# Supplementary material for: Host methylation predicts SARS-CoV-2 infection and clinical outcome
Source: Research Square preprint supplement (doi:10.21203/rs.3.rs-334297/v1), 2021-03-22
Supplement: Supplementary file 1 [file 546879cbbee37e0f999dc4c5.csv]

probeID	chromosome	position	p.value	q.value	beta	statistic	sigma.e	sigma.g	platform	gene	meanbeta_covid	meanbeta_virus	deltabeta
cg25888371_TC21	21	41425781	2.55E-14	1.92E-08	-0.239508375	66.27533648	0.274952447	0.445202997	C0	MX1	0.756912438	0.604712985	-0.152199453
cg22930808	3	122281881	7.34E-13	2.76E-07	-0.188419477	57.85628955	0.279131681	0.451970013	B4	DTX3L;PARP9	0.700057726	0.532771943	-0.167285783
cg15215519	4	185214632	3.81E-12	9.56E-07	0.391702419	53.82659753	0.281200646	0.455320081	B4	NA	0.767303731	0.840952753	0.073649022
cg10728454	15	40201507	1.22E-11	2.21E-06	0.213538116	51.00582894	0.282676595	0.457709937	B4	GPR176	0.51845137	0.663385896	0.144934526
cg13794460	4	175181359	1.76E-11	2.21E-06	0.473580149	50.13270946	0.28313818	0.458457336	B4	FBXO8	0.843017444	0.876153739	0.033136295
cg22488164	12	14716910	1.72E-11	2.21E-06	0.270870134	50.19359213	0.283105921	0.458405101	B4	PLBD1	0.707728394	0.80273885	0.095010456
cg22107082	11	59886242	2.23E-11	2.40E-06	0.308654439	49.57020469	0.283436756	0.45894079	B4	NA	0.877056153	0.916354706	0.039298552
cg01028142	2	7004578	5.41E-11	4.52E-06	-0.243052262	47.46323675	0.284563581	0.460765344	B4	CMPK2	0.869929285	0.799011721	-0.070917564
cg09554140	16	12280351	4.82E-11	4.52E-06	0.535853212	47.73484068	0.284417569	0.460528923	B4	SNX29	0.89971629	0.919081049	0.019364759
cg12955084	19	41886265	8.65E-11	6.51E-06	0.540557089	46.35333669	0.285162595	0.461735269	B4	TMEM91	0.505983674	0.58203998	0.076056306
cg04523589	3	48265146	1.25E-10	7.26E-06	0.590798458	45.48774693	0.28563239	0.46249596	B4	CAMP	0.599476331	0.652252646	0.052776315
cg06146977	13	43469464	1.07E-10	7.26E-06	0.373643984	45.84673891	0.285437267	0.462180017	B4	EPSTI1	0.922242484	0.94036729	0.018124805
cg15633603	2	190399258	1.33E-10	7.26E-06	0.410074069	45.34307634	0.285711136	0.462623466	B4	NA	0.909440608	0.928617348	0.01917674
cg16332119	3	48259336	1.35E-10	7.26E-06	-0.949938951	45.30561917	0.285731535	0.462656496	B4	NA	0.349835898	0.359850211	0.010014314
cg07018629	5	90446250	1.82E-10	8.72E-06	0.315223005	44.60847125	0.286111998	0.463272541	B4	ADGRV1	0.596859502	0.68580504	0.088945539
cg25888372_TC21	21	41425788	1.85E-10	8.72E-06	-0.286163527	44.56419892	0.28613621	0.463311746	C0	MX1	0.6602801	0.569074228	-0.091205872
cg05301191	22	31852880	3.02E-10	1.34E-05	0.419337401	43.42551821	0.286761077	0.46432353	B4	EIF4ENIF1	0.893888275	0.920193601	0.026305326
cg02770216	7	91687079	3.39E-10	1.42E-05	0.324660315	43.1542705	0.286910533	0.464565529	B4	AKAP9	0.821608556	0.885718849	0.064110293
cg25119415	1	158799935	3.96E-10	1.57E-05	0.276240611	42.79047501	0.287111349	0.46489069	B4	MNDA	0.786257088	0.839136537	0.052879449
cg15551881	9	123688715	5.68E-10	2.14E-05	0.311826358	41.95664602	0.28757322	0.465638553	B4	TRAF1	0.363399186	0.441953339	0.078554153
cg22748815	7	99965437	6.33E-10	2.27E-05	0.376287528	41.70418027	0.287713505	0.465865702	B4	PILRB	0.865001654	0.899118966	0.034117312
cg04381163	22	31852077	6.71E-10	2.30E-05	0.298877133	41.57013435	0.287788073	0.465986442	B4	EIF4ENIF1	0.808139822	0.86857674	0.060436918
cg02107842	5	66255772	9.63E-10	2.36E-05	0.273843716	40.73682305	0.288252933	0.466739144	B4	MAST4	0.569528022	0.681887594	0.112359571
cg03753191	13	43566902	8.78E-10	2.36E-05	-0.276137884	40.9480996	0.28813486	0.46654796	B4	EPSTI1	0.156136044	0.096930856	-0.059205188
cg04576915	13	76277579	7.86E-10	2.36E-05	0.417572849	41.20520232	0.287991372	0.466315624	B4	LMO7	0.922943651	0.939684716	0.016741065
cg07957619	6	43595208	1.00E-09	2.36E-05	-0.44193394	40.64723749	0.288303043	0.466820281	B4	GTPBP2	0.392617078	0.356534681	-0.036082398
cg11251971	5	139587026	8.85E-10	2.36E-05	-0.340702988	40.92926931	0.288145378	0.46656499	B4	CYSTM1	0.585568343	0.520402955	-0.065165387
cg14897843	17	71020214	9.63E-10	2.36E-05	0.26647934	40.73471428	0.288254113	0.466741054	B4	SLC39A11	0.868730988	0.917760586	0.049029598
cg21549285	21	42799141	8.67E-10	2.36E-05	-0.162036191	40.97702582	0.288118706	0.466521803	B4	MX1	0.789629348	0.649469691	-0.140159657
cg23649619	2	98461039	9.49E-10	2.36E-05	0.217407998	40.76843995	0.288235255	0.466710519	B4	TMEM131	0.700160419	0.815070734	0.114910315
cg25888374_TC21	21	41425952	1.01E-09	2.36E-05	-0.33517114	40.63714909	0.288308687	0.466829421	C0	MX1	0.280663739	0.231665595	-0.048998144
cg26416074	13	46688810	9.86E-10	2.36E-05	0.346369693	40.68074809	0.288284296	0.466789926	B4	NA	0.909603119	0.92879917	0.019196051
cg02481950	16	21665002	1.07E-09	2.44E-05	0.411239063	40.49225265	0.288389795	0.46696075	B4	METTL9;IGSF6	0.765055799	0.797715734	0.032659934
cg26312951_BC21	21	41425920	1.15E-09	2.55E-05	-0.293172444	40.32503325	0.288483483	0.46711245	C0	MX1	0.388092754	0.310543923	-0.077548831
cg00969476_BC21	1	78619191	1.25E-09	2.61E-05	-0.228564428	40.13473382	0.288590213	0.467285267	C0	IFI44L	0.879781811	0.822259178	-0.057522633
cg11791770	11	611791	1.24E-09	2.61E-05	-0.318815933	40.1588052	0.288576706	0.467263397	B4	PHRF1	0.928680036	0.894624663	-0.034055373
cg25110019	16	83838230	1.28E-09	2.61E-05	0.351038557	40.07980278	0.288621043	0.467335188	B4	LOC102724163	0.804630942	0.842324037	0.037693095
cg00969476_TC21	1	78619191	1.40E-09	2.78E-05	-0.264601393	39.86927425	0.288739295	0.467526661	C0	IFI44L	0.871674226	0.827767649	-0.043906578
cg13452062	1	79088559	1.46E-09	2.83E-05	-0.082432712	39.77240747	0.288793753	0.467614839	B4	IFI44L	0.861822406	0.69841735	-0.163405056
cg27180555	12	112822378	1.51E-09	2.85E-05	0.739565759	39.69673659	0.288836316	0.467683758	B4	NA	0.385040826	0.433290299	0.048249472
cg14956920	7	55605953	1.60E-09	2.93E-05	0.564760926	39.57405525	0.288905362	0.467795556	B4	VOPP1	0.668403739	0.701188743	0.032785004
cg24273484	18	18637322	1.94E-09	3.48E-05	0.303689043	39.12658405	0.289157621	0.468204014	B4	ROCK1	0.82800996	0.883060254	0.055050294
cg00344572	2	137080313	2.10E-09	3.68E-05	0.881014156	38.94610137	0.289259554	0.468369064	B4	NA	0.321011656	0.370087172	0.049075516
cg09054339	3	188265293	2.39E-09	4.00E-05	0.322284949	38.6517724	0.289426016	0.4686386	B4	LPP	0.507371722	0.645717577	0.138345855
cg27420834	15	56940578	2.35E-09	4.00E-05	0.327080166	38.6852642	0.28940706	0.468607906	B4	ZNF280D	0.591337816	0.709267014	0.117929198
cg15582417	7	55605399	2.56E-09	4.18E-05	0.796701655	38.49757838	0.289513338	0.468779992	B4	VOPP1	0.4156021	0.449982805	0.034380704
cg13155430	21	42795929	3.19E-09	5.11E-05	-0.157890294	37.99119797	0.289800664	0.46924523	B4	MX1	0.911577991	0.835337574	-0.076240416
cg20061654	22	45608492	3.32E-09	5.20E-05	0.174009533	37.90360822	0.28985045	0.469325844	B4	C22orf9	0.918938159	0.947137709	0.02819955
cg18257193	12	106699438	3.68E-09	5.65E-05	0.640367918	37.67050275	0.289983073	0.469540587	B4	TCP11L2	0.484707767	0.539254237	0.05454647
cg26312951	21	42797847	3.78E-09	5.68E-05	-0.286296633	37.60979679	0.290017641	0.469596559	B4	MX1	0.384167533	0.308320358	-0.075847174
cg26839028	6	88457622	5.04E-09	7.43E-05	0.668793848	36.95573305	0.290390872	0.470200894	B4	NA	0.290737982	0.336530515	0.045792533
cg18543074	2	6933690	5.93E-09	8.58E-05	-0.431910683	36.58760309	0.290601574	0.470542063	B4	NA	0.428872074	0.410745855	-0.018126219
cg19763025	7	107577607	6.38E-09	9.07E-05	0.213518453	36.41871816	0.29069839	0.470698827	B4	LAMB1	0.543567934	0.686250511	0.142682577
cg22676821	7	55605845	6.72E-09	9.37E-05	0.615831739	36.30327265	0.290764627	0.470806078	B4	VOPP1	0.50770798	0.545610404	0.037902424
cg13876756	5	173360041	7.14E-09	9.46E-05	0.27333005	36.16645116	0.290843187	0.470933282	B4	CPEB4	0.752158945	0.838452801	0.086293857
cg26283713	7	128375140	7.17E-09	9.46E-05	0.475887274	36.15783203	0.290848138	0.470941299	B4	NA	0.803200593	0.832340421	0.029139828
cg27271532	11	612762	7.16E-09	9.46E-05	-0.7046097	36.15877355	0.290847597	0.470940423	B4	IRF7	0.728928364	0.711152918	-0.017775446
cg12424383	1	27990967	7.49E-09	9.72E-05	-0.316641689	36.05786186	0.290905582	0.471034312	B4	NA	0.875830181	0.838581655	-0.037248527
cg07363028	15	63823236	7.97E-09	0.000101731	0.35607827	35.91710808	0.290986518	0.471165364	B4	USP3	0.501580746	0.595762248	0.094181502
cg12359279_BC21	21	41426026	8.41E-09	0.000105585	-0.454531876	35.79535202	0.291056585	0.471278816	C0	MX1	0.073485339	0.061700512	-0.011784827
cg27142757	1	150573467	1.03E-08	0.000127429	-0.342367598	35.33459558	0.291322194	0.471708892	B4	NA	0.535348881	0.493382012	-0.041966869
cg19822755	16	30108259	1.09E-08	0.000132076	0.306663263	35.21745859	0.291389836	0.471818416	B4	YPEL3	0.709143417	0.776084057	0.06694064
cg17281677	12	6658557	1.27E-08	0.000152155	0.387691153	34.86351211	0.29159451	0.472149826	B4	IFFO1	0.637526949	0.682578827	0.045051879
cg16625613	3	46503692	1.48E-08	0.000174293	0.367702339	34.51954345	0.291793829	0.472472563	B4	LTF	0.587830845	0.655760184	0.067929339
cg24103563	11	5645324	1.51E-08	0.000174293	-0.231114189	34.48248975	0.291815325	0.472507369	B4	TRIM6-TRIM34;TRIM34	0.906515504	0.863320191	-0.043195313
cg25701517	3	12671175	1.53E-08	0.000174293	0.360499352	34.45447401	0.291831581	0.47253369	B4	RAF1	0.882765831	0.902734879	0.019969048
cg23338668	8	74240259	1.64E-08	0.000183853	-0.649660365	34.30116023	0.291920587	0.47267781	B4	NA	0.368781647	0.398649804	0.029868157
cg10549986	2	7018153	1.78E-08	0.000196848	-0.145927117	34.11512331	0.292028701	0.472852867	B4	RSAD2	0.187601352	0.124348024	-0.063253328
cg19242112	3	140664727	1.90E-08	0.000205219	0.412078818	33.96550436	0.292115738	0.472993797	B4	SLC25A36	0.898075187	0.919218304	0.021143117
cg26955963	2	8466005	1.91E-08	0.000205219	0.327561275	33.95713139	0.292120611	0.473001688	B4	LINC00299	0.653905289	0.74074645	0.08684116
cg22434506	12	6657818	1.97E-08	0.000209134	0.21698184	33.8831778	0.292163663	0.473071397	B4	IFFO1	0.927860537	0.944645136	0.016784599
cg17114584	11	613792	2.05E-08	0.000214772	-0.227029966	33.7924766	0.292216489	0.473156934	B4	IRF7	0.606095749	0.464223786	-0.141871963
cg05167074	19	41091695	2.16E-08	0.000222664	-0.397157621	33.68105692	0.292281423	0.473262074	B4	SHKBP1	0.505189339	0.483181154	-0.022008185
cg12906975	8	144105259	2.21E-08	0.000224121	-0.250269398	33.62500891	0.292314103	0.47331499	B4	NA	0.952838827	0.930325509	-0.022513317
cg14750551	3	122401343	2.23E-08	0.000224121	-0.399872091	33.60615657	0.292325097	0.473332792	B4	PARP14	0.948514597	0.930492073	-0.018022524
cg03247739	16	3910867	2.44E-08	0.000236101	0.46915569	33.40796475	0.292440759	0.473520071	B4	CREBBP	0.38544607	0.445634978	0.060188908
cg13117953	7	157706117	2.45E-08	0.000236101	0.21475258	33.40245174	0.292443978	0.473525284	B4	PTPRN2	0.866198294	0.913880616	0.047682322
cg18526310	14	52379531	2.42E-08	0.000236101	0.412360593	33.42396059	0.292431419	0.473504948	B4	GNG2	0.844452052	0.863281275	0.018829223
cg22418084	6	73623666	2.59E-08	0.000246688	0.541147915	33.27624913	0.292517702	0.473644657	B4	KCNQ5	0.552147519	0.604088983	0.051941463
cg03879629	3	46152446	2.84E-08	0.000260456	-0.208097144	33.073162	0.292636456	0.473836944	B4	NA	0.373594077	0.298533699	-0.075060378
cg09577455	6	29593382	2.81E-08	0.000260456	-0.466122486	33.08994687	0.292626636	0.473821043	B4	GABBR1	0.440194556	0.403564508	-0.036630048
cg20498089	11	44614255	2.84E-08	0.000260456	-0.845321583	33.0722124	0.292637012	0.473837843	B4	CD82	0.256278997	0.269783428	0.013504431
cg25474638	6	159484481	2.95E-08	0.000267505	0.589817574	32.98577429	0.2926876	0.473919756	B4	NA	0.625546777	0.668042659	0.042495882
cg21522405	2	216444711	3.08E-08	0.000276016	0.367778837	32.88942449	0.29274402	0.474011112	B4	NA	0.776162147	0.818242625	0.042080478
cg04321224	21	46341380	3.43E-08	0.000303606	0.477721875	32.65124729	0.292883632	0.474237171	B4	ITGB2	0.342423573	0.379880136	0.037456563
cg22652934	21	36180035	3.58E-08	0.000313104	-0.249153808	32.55681048	0.292939043	0.474326892	B4	RUNX1	0.288550951	0.236939708	-0.051611242
cg04068159	3	195973977	3.67E-08	0.000317502	-0.92788959	32.50014966	0.292972304	0.474380749	B4	PCYT1A	0.30189417	0.327667572	0.025773402
cg01355089	1	93495018	3.90E-08	0.000333863	0.354689879	32.3632129	0.293052735	0.474510983	B4	NA	0.581372071	0.620542189	0.039170118
cg16382882	12	113435923	4.12E-08	0.000348745	0.553509775	32.24138017	0.29312435	0.474626942	B4	OAS2	0.959454763	0.961415781	0.001961018
cg02516957	8	128011063	4.23E-08	0.000350602	0.445193038	32.18330506	0.293158506	0.474682248	B4	NA	0.460155464	0.524976399	0.064820935
cg15049177	12	117476704	4.24E-08	0.000350602	0.39090948	32.18031039	0.293160268	0.4746851	B4	NA	0.584639841	0.640359546	0.055719705
cg05304729	1	158800024	4.51E-08	0.000368897	0.2507424	32.0433196	0.293240886	0.474815637	B4	MNDA	0.26745996	0.331084449	0.063624489
cg01061416	21	42832451	4.83E-08	0.000391239	-0.246725742	31.88909694	0.293331724	0.474962722	B4	NA	0.94807096	0.917306512	-0.030764449
cg03403209	16	29666641	4.92E-08	0.000393679	0.535164434	31.85164695	0.293353795	0.47499846	B4	NA	0.395351914	0.441978405	0.046626491
cg16152846	14	81630352	5.09E-08	0.000403641	0.335777612	31.77289897	0.293400222	0.475073633	B4	NA	0.858966965	0.895887257	0.036920293
cg15560375	17	55059968	5.20E-08	0.000407956	0.475522575	31.72618998	0.29342777	0.475118239	B4	SCPEP1	0.526287732	0.581391983	0.055104251
cg14237301	16	28506477	5.43E-08	0.000421179	0.312406335	31.63269573	0.293482934	0.475207561	B4	APOB48R	0.683427723	0.739523814	0.05609609
cg04222851	9	126520021	5.66E-08	0.00043475	0.663480502	31.5398792	0.293537729	0.475296285	B4	DENND1A	0.957106974	0.957058646	-4.83E-05
cg02797539	17	72740524	6.13E-08	0.00046133	0.643775822	31.36408184	0.293641597	0.475464468	B4	RAB37	0.266463461	0.313689533	0.047226072
cg21834463	6	134538515	6.10E-08	0.00046133	0.48005064	31.37449088	0.293635443	0.475454505	B4	SGK1	0.323645779	0.397738437	0.074092658
cg24908179	4	169190224	6.37E-08	0.000475159	0.489596757	31.27687475	0.293693163	0.475547964	B4	DDX60	0.955717692	0.961577239	0.005859547
cg01885405	8	116283637	7.26E-08	0.000520421	0.441619675	30.99038104	0.29386276	0.475822575	B4	NA	0.403583122	0.468511017	0.064927896
cg05948127	7	107577779	7.23E-08	0.000520421	0.215269011	30.99945058	0.293857387	0.475813875	B4	LAMB1	0.444732278	0.565915931	0.121183653
cg11642382	7	145813066	7.15E-08	0.000520421	0.334221668	31.02452993	0.293842529	0.475789818	B4	CNTNAP2	0.026605259	0.037105942	0.010500683
cg14455991	X	41582245	7.19E-08	0.000520421	0.301145169	31.01211018	0.293849887	0.475801731	B4	GPR82;CASK	0.719515831	0.783405716	0.063889885
cg09331334	7	55605423	7.38E-08	0.000521552	0.772413779	30.95322012	0.29388478	0.47585823	B4	VOPP1	0.503962765	0.533386463	0.029423697
cg18663307	21	46341389	7.41E-08	0.000521552	0.418441071	30.9439918	0.293890249	0.475867086	B4	ITGB2	0.343625532	0.383346517	0.039720986
cg10906971	4	154400195	7.49E-08	0.000522124	0.411384488	30.92106864	0.293903835	0.475889085	B4	KIAA0922	0.714126575	0.771409279	0.057282704
cg07362849	19	17516901	7.67E-08	0.000529823	-0.285953466	30.86848617	0.293935008	0.475939559	B4	BISPR;MVB12A;BST2	0.187228174	0.153052482	-0.034175692
cg08084228	16	50700118	7.83E-08	0.000535822	-0.288243662	30.82345835	0.29396171	0.475982795	B4	NA	0.777308222	0.7649523	-0.012355921
cg22862003	21	42797588	7.90E-08	0.000535822	-0.265374198	30.80361125	0.293973481	0.476001856	B4	MX1	0.644584727	0.571141491	-0.073443235
cg16548864	3	60188195	8.22E-08	0.000552772	-0.365088853	30.71525251	0.294025906	0.476086742	B4	FHIT	0.832774486	0.820565575	-0.012208912
cg08122652	3	122281939	8.77E-08	0.000584609	-0.19111712	30.57240367	0.29411072	0.476224073	B4	DTX3L;PARP9	0.814727362	0.734094172	-0.08063319
cg06070445	3	187453772	9.03E-08	0.00059621	0.314850203	30.50977703	0.294147927	0.476284317	B4	BCL6	0.821608311	0.877115319	0.055507009
cg16815882	1	35908609	9.27E-08	0.000606864	0.63908679	30.45160247	0.294182501	0.4763403	B4	KIAA0319L	0.303512041	0.344634832	0.04112279
cg26343550	17	35502609	1.02E-07	0.000660702	0.528533365	30.24570299	0.294304969	0.4765386	B4	ACACA	0.743593618	0.768003743	0.024410125
cg08319289	3	190261614	1.05E-07	0.000669337	0.428673112	30.16937414	0.294350408	0.476612175	B4	IL1RAP	0.64732504	0.694253381	0.046928341
cg08835163	20	34475554	1.07E-07	0.000669337	0.474673296	30.1427036	0.29436629	0.476637891	B4	PHF20	0.381875513	0.471643764	0.089768251
cg08888522	2	163172908	1.05E-07	0.000669337	-0.221179434	30.16966112	0.294350237	0.476611899	B4	IFIH1	0.916716985	0.888588503	-0.028128481
cg25474641	2	174221705	1.07E-07	0.000669337	0.285261765	30.14412399	0.294365444	0.476636522	B4	CDCA7	0.82286963	0.873140156	0.050270525
cg12313149	2	136763629	1.09E-07	0.000669925	-0.507299192	30.08655371	0.294399735	0.476692046	B4	NA	0.324727281	0.344527476	0.019800195
cg18142930	3	157839900	1.09E-07	0.000669925	0.701670231	30.09355726	0.294395563	0.47668529	B4	RSRC1	0.932939308	0.929700643	-0.003238665
cg18898103	11	128452127	1.09E-07	0.000669925	0.317677243	30.10393732	0.29438938	0.476675278	B4	ETS1	0.81914849	0.871024961	0.051876471
cg16612971	10	75686132	1.12E-07	0.000677154	0.663257006	30.04521063	0.294424368	0.476731931	B4	NA	0.439847277	0.48866335	0.048816073
cg18098839	3	167742700	1.14E-07	0.000686916	-0.421364058	29.9961658	0.294453598	0.47677926	B4	GOLIM4	0.138805249	0.121614042	-0.017191208
cg06981309	3	146260954	1.18E-07	0.000700468	-0.301450799	29.92217216	0.294497713	0.476850692	B4	PLSCR1	0.386043858	0.348846369	-0.037197489
cg11292438	16	67424867	1.18E-07	0.000700468	0.611725325	29.91846417	0.294499924	0.476854272	B4	TPPP3	0.397099352	0.451272688	0.054173336
cg23655126	22	38967436	1.20E-07	0.000703687	0.509761663	29.89119946	0.294516185	0.476880601	B4	DMC1	0.386655415	0.475869248	0.089213832
cg17199162	15	68593485	1.25E-07	0.000722497	0.448287554	29.80326746	0.294568646	0.476965546	B4	NA	0.775414723	0.815510262	0.040095539
cg20380468	5	39203057	1.25E-07	0.000722497	0.33443042	29.79934469	0.294570987	0.476969337	B4	FYB	0.352179881	0.412633809	0.060453928
cg03963853	16	4732369	1.31E-07	0.00074588	0.179482093	29.69605867	0.294632646	0.477069174	B4	MGRN1	0.932819774	0.948212068	0.015392294
cg08156824	16	715007	1.30E-07	0.00074588	-0.249560593	29.70093836	0.294629732	0.477064456	B4	WDR90	0.892342353	0.868067313	-0.02427504
cg06792742	11	114269589	1.35E-07	0.000758389	0.334652544	29.6233756	0.294676059	0.477139468	B4	C11orf71	0.781065669	0.831449542	0.050383874
cg07124045	10	103595509	1.37E-07	0.000758389	0.231758118	29.59421161	0.294693483	0.477167683	B4	KCNIP2	0.836784833	0.898974603	0.06218977
cg22346073	2	122402890	1.35E-07	0.000758389	0.3880157	29.63188652	0.294670974	0.477131236	B4	CLASP1	0.356535159	0.447001796	0.090466637
cg26704180	7	137859780	1.37E-07	0.000758389	-0.641822043	29.60151364	0.29468912	0.477160618	B4	NA	0.916807776	0.894326168	-0.022481608
cg00089960	12	122245655	1.42E-07	0.000781889	0.36821075	29.51133492	0.294743017	0.477247887	B4	SETD1B	0.483727032	0.557204347	0.073477315
cg17615052	4	12117897	1.50E-07	0.000816991	0.297506751	29.39928745	0.294810025	0.477356387	B4	NA	0.580180266	0.641650364	0.061470099
cg10014405	1	16012344	1.67E-07	0.000902708	0.326559344	29.16528722	0.294950112	0.477583216	B4	PLEKHM2	0.759414829	0.809517782	0.050102953
cg04708790	12	113355675	1.74E-07	0.000916535	0.377760414	29.07712588	0.295002943	0.477668759	B4	OAS1	0.915559646	0.925401378	0.009841732
cg09764233	10	75003627	1.72E-07	0.000916535	0.660016813	29.09216991	0.294993926	0.477654159	B4	DNAJC9	0.388920582	0.436360626	0.047440044
cg11832534	1	3563998	1.74E-07	0.000916535	0.225152307	29.070068	0.295007173	0.47767561	B4	WDR8	0.860230772	0.900663132	0.04043236
cg16176675	5	134786942	1.71E-07	0.000916535	0.368075143	29.10960291	0.294983478	0.477637241	B4	TIFAB	0.839227049	0.851919193	0.012692144
cg07133321	3	45607976	1.81E-07	0.000939331	0.325357578	28.98998397	0.295055191	0.477753359	B4	NA	0.723206077	0.78048708	0.057281002
cg13280734	11	57252275	1.81E-07	0.000939331	0.824613205	28.98606355	0.295057542	0.477757166	B4	SLC43A1	0.318058404	0.3577263	0.039667896
cg19339102	12	40601799	1.90E-07	0.000978191	0.714797003	28.88254895	0.295119644	0.477857721	B4	NA	0.942717775	0.938600708	-0.004117067
cg21770436	11	93272548	1.92E-07	0.000980916	0.350761751	28.86157902	0.295132229	0.4778781	B4	C11orf75	0.802554335	0.842067114	0.039512779
cg16785077	21	42791867	2.02E-07	0.001027349	-0.235662365	28.7458686	0.295201703	0.477990592	B4	MX1	0.851445692	0.788613019	-0.062832673
cg08642859	3	126175220	2.08E-07	0.001053356	0.274924198	28.67665818	0.295243281	0.478057915	B4	ZXDC	0.821213322	0.863850122	0.0426368
cg19222895	16	14020501	2.12E-07	0.001063295	0.358965937	28.6415958	0.295264352	0.478092033	B4	ERCC4	0.753783923	0.797183751	0.043399828
cg17053201	6	29593246	2.14E-07	0.001067939	-0.75405289	28.61760944	0.295278769	0.478115377	B4	GABBR1	0.233981792	0.227298053	-0.006683739
cg07638954	5	86596168	2.16E-07	0.001069952	0.434724117	28.59911672	0.295289885	0.478133376	B4	RASA1	0.911997221	0.92819	0.01619278
cg16609548	2	172568685	2.25E-07	0.001106766	-0.286780732	28.51110254	0.29534281	0.478219073	B4	DYNC1I2	0.821099447	0.813554765	-0.007544682
cg00969526_BO21	1	78628575	2.32E-07	0.001132827	-0.121423546	28.44620937	0.29538185	0.478282286	C0	IFI44L	0.734329563	0.637237491	-0.097092072
cg07226581	9	37859354	2.41E-07	0.001167009	0.34906281	28.36359324	0.295431575	0.478362801	B4	DCAF10	0.792281017	0.834130197	0.04184918
cg08920210	10	101686811	2.42E-07	0.001167009	-0.879658754	28.35337514	0.295437727	0.478372761	B4	NCRNA00093;DNMBP	0.28252756	0.281744632	-0.000782928
cg21506763	3	38060329	2.44E-07	0.001170545	0.48448721	28.3328774	0.295450068	0.478392745	B4	PLCD1	0.433512849	0.470937449	0.037424599
cg27167895	4	88818173	2.56E-07	0.001219327	0.430850983	28.23019971	0.295511914	0.478492886	B4	NA	0.583749168	0.646337799	0.06258863
cg04841160	12	1721749	2.74E-07	0.001297082	0.534719535	28.08202472	0.295601233	0.478637511	B4	NA	0.330371792	0.400090134	0.069718342
cg08661617	8	17198946	2.79E-07	0.00131465	-0.614915922	28.03914797	0.295627094	0.478679385	B4	MTMR7	0.407439742	0.403527337	-0.003912405
cg03975178	9	125835066	2.91E-07	0.001360123	0.640987388	27.95170696	0.295679855	0.478764815	B4	RABGAP1	0.946689975	0.947068981	0.000379006
cg14094841	20	3692262	2.94E-07	0.001366417	-0.511420623	27.92822192	0.29569403	0.478787768	B4	NA	0.316607614	0.302317337	-0.014290277
cg14275931	16	15730730	2.96E-07	0.001367466	0.643896093	27.91318595	0.295703107	0.478802465	B4	KIAA0430	0.397420835	0.415020357	0.017599522
cg09278865	3	48779789	3.09E-07	0.0014119	0.532384401	27.81725131	0.295761038	0.478896268	B4	NA	0.925594275	0.929539857	0.003945581
cg12877361	12	113356935	3.08E-07	0.0014119	0.251341192	27.82449901	0.295756661	0.478889179	B4	OAS1	0.82635059	0.862063617	0.035713027
cg05847519	16	83829911	3.20E-07	0.001448535	0.175238205	27.74635495	0.295803872	0.478965624	B4	CDH13	0.56056126	0.67755484	0.11699358
cg18278694	1	179945973	3.21E-07	0.001448535	0.750706028	27.73548707	0.29581044	0.478976259	B4	CEP350	0.268957317	0.311358623	0.042401306
cg05144113	12	56578049	3.31E-07	0.001484048	0.406263522	27.66996994	0.295850043	0.479040384	B4	SMARCC2	0.926251671	0.93541084	0.009159169
cg21161138	5	399360	3.44E-07	0.001505019	0.44952591	27.5884868	0.295899319	0.479120172	B4	AHRR	0.726893413	0.751221767	0.024328354
cg22862003_BC21	21	41425661	3.41E-07	0.001505019	-0.246790047	27.60522249	0.295889197	0.479103781	C0	MX1	0.653757986	0.579142229	-0.074615757
cg23078782	22	29516651	3.38E-07	0.001505019	-0.198107914	27.62662681	0.295876251	0.479082821	B4	KREMEN1	0.869388543	0.826941831	-0.042446712
cg23540139	11	614521	3.42E-07	0.001505019	-0.561119525	27.60070698	0.295891928	0.479108204	B4	IRF7	0.699551266	0.666470982	-0.033080284
cg05197514	3	185656291	3.48E-07	0.001516083	0.311038004	27.56003099	0.295916533	0.479148045	B4	TRA2B	0.504458668	0.612626105	0.108167437
cg05263215	1	6093602	3.55E-07	0.001534279	0.554135009	27.52166363	0.295939748	0.479185635	B4	KCNAB2	0.691574534	0.716811513	0.025236978
cg03921763	1	232054260	3.73E-07	0.001606206	0.331778361	27.40994138	0.296007379	0.479295143	B4	DISC1;TSNAX-DISC1	0.572633093	0.614861726	0.042228633
cg10652637	5	98299078	3.79E-07	0.001620445	0.277795594	27.37847197	0.296026437	0.479326002	B4	NA	0.917608665	0.936218971	0.018610306
cg22028539	12	92341557	3.85E-07	0.001635799	0.233996337	27.34576794	0.296046247	0.479358078	B4	NA	0.769129895	0.826867928	0.057738034
cg07252680	14	94857224	3.89E-07	0.001644492	-0.442863257	27.32208564	0.296060595	0.47938131	B4	SERPINA1	0.476294013	0.469034095	-0.007259919
cg08924256	8	107672853	3.97E-07	0.001657354	0.491712837	27.27887704	0.296086778	0.479423705	B4	OXR1	0.945524239	0.943671226	-0.001853012
cg14755717	11	2415046	3.99E-07	0.001657354	-0.408076767	27.26826763	0.296093208	0.479434116	B4	CD81	0.875392537	0.834591643	-0.040800895
cg21327712	1	111744503	4.01E-07	0.001657354	0.282025101	27.25708815	0.296099984	0.479445088	B4	DENND2D	0.598218138	0.67688415	0.078666012
cg24757001	19	54714774	3.97E-07	0.001657354	-0.363920685	27.27953119	0.296086381	0.479423063	B4	NA	0.075238194	0.065277759	-0.009960434
cg06712932	12	94672432	4.06E-07	0.001660027	0.210660455	27.22993763	0.296116442	0.479471737	B4	PLXNC1	0.675416547	0.737842948	0.062426401
cg27509121	4	14169971	4.04E-07	0.001660027	-1.021881225	27.23749374	0.296111861	0.47946432	B4	NA	0.948336472	0.935564511	-0.012771961
cg08127490	20	16598004	4.22E-07	0.001715476	-0.874828804	27.1470894	0.296166679	0.479553081	B4	NA	0.959596092	0.949965822	-0.009630271
cg13304609	1	79085162	4.30E-07	0.001740304	-0.184220756	27.10433315	0.296192616	0.479595077	B4	IFI44L	0.920424564	0.882464579	-0.037959985
cg23701226	3	122516277	4.35E-07	0.001752228	0.358978764	27.07796134	0.296208616	0.479620986	B4	DIRC2	0.701074605	0.727640984	0.02656638
cg13359301	7	148843026	4.40E-07	0.001756462	0.304688153	27.05507979	0.296222502	0.479643469	B4	ZNF398	0.415479593	0.50744872	0.091969127
cg25232236	10	126412275	4.41E-07	0.001756462	0.383210664	27.04972882	0.296225749	0.479648727	B4	FAM53B	0.21624333	0.254971317	0.038727987
cg18218638	19	54768850	4.46E-07	0.001766638	0.307740088	27.02582167	0.296240259	0.479672222	B4	NA	0.838385606	0.879304107	0.0409185
cg06662144	8	134696335	4.57E-07	0.001781268	0.352919716	26.97411222	0.296271651	0.479723052	B4	NA	0.634902486	0.656144984	0.021242498
cg12633399	8	128052382	4.57E-07	0.001781268	0.33813674	26.97436789	0.296271496	0.479722801	B4	NA	0.712808249	0.76371478	0.050906532
cg16400320	8	144105210	4.54E-07	0.001781268	-0.257383776	26.98458863	0.29626529	0.479712753	B4	NA	0.929374905	0.904403517	-0.024971388
cg00649794	12	99093196	4.59E-07	0.001783115	0.286121774	26.96069794	0.296279796	0.479736241	B4	APAF1	0.897328558	0.920327132	0.022998574
cg14126711	2	44363123	4.62E-07	0.001784344	0.333611031	26.94809403	0.29628745	0.479748634	B4	NA	0.797819274	0.841953593	0.04413432
cg00170307	7	95752710	4.74E-07	0.00181171	0.295567957	26.89313904	0.296320829	0.47980268	B4	SLC25A13	0.727653273	0.80081339	0.073160117
cg12783890	5	31825289	4.74E-07	0.00181171	-0.545002565	26.89438211	0.296320074	0.479801457	B4	PDZD2	0.301913298	0.294040182	-0.007873116
cg04432278	10	72326192	4.83E-07	0.001835769	0.745547401	26.85368866	0.296344797	0.47984149	B4	PALD1	0.39788997	0.446436933	0.048546963
cg19091967	8	96049113	4.92E-07	0.001862212	0.332854486	26.81190496	0.296370189	0.479882605	B4	NDUFAF6	0.841604261	0.880243797	0.038639536
cg21019156	12	71930408	4.98E-07	0.001876186	0.360776511	26.78492784	0.296386587	0.479909156	B4	LGR5	0.618729784	0.641868428	0.023138644
cg10600828	8	123931655	5.04E-07	0.001888041	0.391258944	26.76055114	0.296401406	0.479933151	B4	ZHX2	0.860158249	0.865289212	0.005130963
cg00982274	1	154405736	5.10E-07	0.001899973	0.619492885	26.73460676	0.296417181	0.479958694	B4	IL6R	0.545030971	0.574287429	0.029256458
cg03449427	15	35601271	5.12E-07	0.001899973	0.328334333	26.72556481	0.296422679	0.479967597	B4	NA	0.900180254	0.922343682	0.022163428
cg02176569	2	231092121	5.16E-07	0.001903357	-0.378939736	26.7111113	0.296431469	0.479981829	B4	SP140	0.398417762	0.356976144	-0.041441619
cg24939380	4	84189574	5.21E-07	0.00191288	0.398722879	26.68977756	0.296444444	0.480002838	B4	COQ2	0.898672074	0.915366819	0.016694745
cg14551975	15	59478332	5.26E-07	0.001921843	0.354333835	26.66918089	0.296456973	0.480023125	B4	MYO1E	0.39366361	0.482649077	0.088985466
cg08809333	19	8118857	5.36E-07	0.001950847	0.425017589	26.62639532	0.296483003	0.480065274	B4	CCL25	0.839124212	0.866257907	0.027133695
cg04725636	8	67004538	5.79E-07	0.002084372	-0.246706931	26.46282599	0.296582582	0.480226511	B4	DNAJC5B	0.428485862	0.385289648	-0.043196213
cg10327647	1	192914734	5.76E-07	0.002084372	0.649584321	26.47116559	0.296577503	0.480218287	B4	LINC01032	0.423950083	0.450721387	0.026771304
cg00969526_BC21	1	78628575	5.86E-07	0.002099391	-0.1290956	26.43705215	0.296598282	0.480251932	C0	IFI44L	0.703621583	0.616268251	-0.087353333
cg00547727	16	714968	5.91E-07	0.002108286	0.575183267	26.4176937	0.296610076	0.480271029	B4	WDR90	0.966401236	0.964611142	-0.001790094
cg25888265_TC21	21	41420035	5.95E-07	0.00211261	-0.450976536	26.40308366	0.296618977	0.480285442	C0	MX1	0.370256165	0.341490097	-0.028766069
cg15184529	21	40132309	5.98E-07	0.002112614	0.414718127	26.39293441	0.296625162	0.480295456	B4	LINC00114	0.418882067	0.478138038	0.059255971
cg13827596	1	185298424	6.01E-07	0.002113226	-0.35885678	26.38221395	0.296631694	0.480306034	B4	GS1-279B7.1	0.455730326	0.443338785	-0.012391541
cg03614034	1	87783910	6.08E-07	0.002121009	0.442413477	26.35549457	0.296647978	0.480332401	B4	NA	0.760735218	0.766356326	0.005621108
cg20272496	11	46685396	6.09E-07	0.002121009	0.423885589	26.35423939	0.296648743	0.48033364	B4	ATG13	0.601476979	0.642046734	0.040569755
cg00021275	2	128142155	6.17E-07	0.002139511	0.356219142	26.32556731	0.296666221	0.480361939	B4	NA	0.64243106	0.701770401	0.05933934
cg18222865	11	14664689	6.20E-07	0.002140242	0.412793127	26.31492435	0.296672709	0.480372445	B4	PSMA1;PDE3B	0.624597562	0.665649631	0.041052069
cg19371652	12	113415883	6.36E-07	0.002178427	-0.423475824	26.25852325	0.2967071	0.48042813	B4	OAS2	0.333018437	0.28958605	-0.043432388
cg23529129	3	171870162	6.37E-07	0.002178427	-0.357677772	26.25714755	0.296707939	0.480429489	B4	FNDC3B	0.780574822	0.767420197	-0.013154625
cg22659920	4	153237081	6.41E-07	0.002184272	0.3214159	26.24160695	0.296717417	0.480444836	B4	NA	0.847601124	0.886323237	0.038722113
cg13108141	7	129590607	6.55E-07	0.002219975	0.352810131	26.1944835	0.296746163	0.480491381	B4	UBE2H	0.154222596	0.174888616	0.020666021
cg13274938	17	38493822	6.61E-07	0.002219975	0.425893399	26.17765084	0.296756433	0.48050801	B4	RARA	0.745341345	0.772060088	0.026718743
cg18565023	17	32503	6.59E-07	0.002219975	-0.219780228	26.18183149	0.296753882	0.48050388	B4	DOC2B	0.823830428	0.778591924	-0.045238504
cg10697445	12	92851733	6.86E-07	0.002266298	0.253137478	26.0955328	0.296806551	0.480589162	B4	NA	0.868193047	0.884675724	0.016482677
cg15480653	9	132751589	6.86E-07	0.002266298	0.555506677	26.09550187	0.29680657	0.480589192	B4	FNBP1	0.329144638	0.351068077	0.021923439
cg16668097	1	230253723	6.87E-07	0.002266298	0.251483914	26.0939747	0.296807502	0.480590702	B4	GALNT2	0.814818008	0.863070817	0.048252808
cg16871561	12	98986887	6.89E-07	0.002266298	0.219737189	26.08566838	0.296812573	0.480598913	B4	SLC25A3	0.61652573	0.680731895	0.064206165
cg23549385	3	49318213	6.82E-07	0.002266298	-0.291748703	26.10912729	0.296798252	0.480575724	B4	USP4	0.810052123	0.811484675	0.001432552
cg23686027	2	43184882	6.99E-07	0.002281018	0.753930943	26.05459265	0.296831547	0.480629635	B4	NA	0.308708453	0.34485373	0.036145277
cg24707889	21	46341304	7.00E-07	0.002281018	0.329828066	26.05302148	0.296832506	0.480631189	B4	ITGB2	0.588161638	0.615948858	0.027787221
cg26918935_TC21	13	108268453	7.11E-07	0.002308659	0.26923765	26.01780894	0.296854011	0.480666008	C0	TNFSF13B	0.805008225	0.867483323	0.062475098
cg11132913	1	59285109	7.16E-07	0.002312834	0.386545235	26.00466882	0.296862036	0.480679004	B4	NA	0.878307862	0.906407806	0.028099944
cg22537960	22	30304185	7.37E-07	0.002370225	0.233100126	25.94273239	0.296899875	0.480740273	B4	MTMR3	0.816053139	0.867285452	0.051232313
cg16622958	16	87397796	7.51E-07	0.002404464	0.097714799	25.90272039	0.296924328	0.480779866	B4	FBXO31	0.816221602	0.892552524	0.076330921
cg15452182	1	170502937	7.73E-07	0.002445457	0.207599487	25.83910585	0.296963217	0.480842835	B4	GORAB;LOC101928650	0.742453767	0.825590349	0.083136582
cg24819835	4	15780011	7.71E-07	0.002445457	-0.362590714	25.84592573	0.296959047	0.480836083	B4	CD38	0.125263029	0.100683212	-0.024579816
cg25888264_BC21	21	41420023	7.71E-07	0.002445457	-0.422309163	25.84459672	0.296959859	0.480837399	C0	MX1	0.523997389	0.488580582	-0.035416808
cg18593727	3	121380792	7.89E-07	0.002485487	0.473187169	25.795197	0.296990068	0.480886312	B4	HCLS1	0.945610696	0.947038231	0.001427535
cg11343553	6	42346034	7.94E-07	0.0024912	0.391263703	25.78129076	0.296998573	0.480900084	B4	TRERF1	0.87151718	0.870113446	-0.001403733
cg10778971	14	94577101	8.01E-07	0.002503259	-0.225238894	25.76197971	0.297010386	0.480919211	B4	IFI27	0.89385467	0.852285598	-0.041569072
cg05309505	11	612837	8.08E-07	0.002512955	-0.302982207	25.7437965	0.29702151	0.480937223	B4	IRF7	0.984037467	0.977435516	-0.00660195
cg24376955	10	43637359	8.11E-07	0.002512955	0.559988962	25.73591775	0.29702633	0.480945028	B4	CSGALNACT2	0.619109218	0.648430444	0.029321225
cg14470223	15	69431645	8.18E-07	0.002524702	0.514184755	25.71707645	0.297037858	0.480963695	B4	MIR548H4	0.742346806	0.763935755	0.021588949
cg08724371	15	91442212	8.47E-07	0.002601603	-0.487645078	25.64385	0.297082676	0.481036263	B4	NA	0.940967637	0.934406042	-0.006561596
cg26874185	7	139408686	8.53E-07	0.002609658	-0.803701452	25.62846578	0.297092094	0.481051513	B4	HIPK2	0.957676363	0.946072513	-0.011603851
cg02411663	12	8130007	8.78E-07	0.002665823	0.485765644	25.56536991	0.297130731	0.481114075	B4	NA	0.277406991	0.324443042	0.047036051
cg13575216_BC21	21	41443280	8.77E-07	0.002665823	-0.344904071	25.56910373	0.297128445	0.481110372	C0	MX1	0.868040888	0.851755941	-0.016284946
cg26171784	6	130018227	9.02E-07	0.002727543	0.46875918	25.50761214	0.297166113	0.481171364	B4	ARHGAP18	0.737453822	0.776882051	0.039428229
cg15518353	21	42818806	9.11E-07	0.002743478	-0.526914254	25.48651351	0.297179041	0.481192297	B4	MX1	0.950305993	0.937173001	-0.013132993
cg12340267	5	142170186	9.43E-07	0.002829636	0.494822266	25.41161858	0.297224945	0.481266625	B4	ARHGAP26	0.589146657	0.640522497	0.051375841
cg04420502	12	70320468	9.49E-07	0.002833908	0.339689921	25.39985628	0.297232156	0.481278302	B4	MYRFL	0.944585363	0.953378873	0.00879351
cg08176258	7	1938450	9.53E-07	0.002834545	-0.360116317	25.3908807	0.297237659	0.481287213	B4	MAD1L1	0.536397919	0.510905899	-0.025492019
cg05706766	12	47740526	9.65E-07	0.002859602	0.350012475	25.36354983	0.297254418	0.481314349	B4	NA	0.91654167	0.931710727	0.015169057
cg03582582	7	139444053	9.85E-07	0.002907732	0.174813564	25.31934123	0.297281533	0.481358252	B4	HIPK2	0.709929676	0.776469736	0.06654006
cg02969426	13	45775005	9.93E-07	0.00291948	-0.578548664	25.302309	0.297291981	0.48137517	B4	GTF2F2;KCTD4	0.512733846	0.521084163	0.008350318
cg02508743	8	56903623	1.02E-06	0.002989516	0.476980936	25.24314767	0.297328281	0.481433948	B4	LYN	0.410899943	0.437364576	0.026464632
cg17550329	5	133797432	1.03E-06	0.003016588	-0.296814208	25.21551082	0.297345244	0.481461413	B4	NA	0.910353645	0.887625992	-0.022727653
cg24770782	6	144144818	1.05E-06	0.003059457	-0.392312468	25.17699367	0.297368888	0.481499698	B4	PHACTR2	0.384093504	0.407432316	0.023338811
cg04441796	4	108834026	1.06E-06	0.003067102	0.321636716	25.16339369	0.297377238	0.481513219	B4	LOC101929595;SGMS2	0.795969174	0.853991398	0.058022224
cg22141907	1	20915180	1.06E-06	0.003067388	0.365051695	25.1549718	0.29738241	0.481521592	B4	CDA	0.734393279	0.757449143	0.023055863
cg02618071	17	42406184	1.08E-06	0.003082114	0.708928829	25.12757136	0.297399236	0.481548837	B4	NA	0.467405775	0.497266309	0.029860534
cg04880620	12	113415945	1.08E-06	0.003082114	-0.572570565	25.11451061	0.297407257	0.481561825	B4	OAS2	0.58917078	0.544130289	-0.045040491
cg08926253	11	614761	1.08E-06	0.003082114	-0.306080097	25.13005854	0.297397708	0.481546364	B4	IRF7	0.5751818	0.525896399	-0.049285401
cg24818060	9	101595573	1.08E-06	0.003082114	0.528891774	25.11214254	0.297408712	0.48156418	B4	GALNT12	0.947711077	0.949567201	0.001856123
cg26147480	10	126490099	1.11E-06	0.003139756	0.331714655	25.06440574	0.297438036	0.481611662	B4	FAM175B	0.891486879	0.901319308	0.009832429
cg15409307	12	6661142	1.12E-06	0.003147245	0.392666307	25.05127294	0.297446105	0.481624727	B4	IFFO1	0.865639619	0.883807015	0.018167396
cg22185977	5	1518133	1.14E-06	0.003200388	0.309236218	25.00743168	0.297473046	0.48166835	B4	LPCAT1	0.48676034	0.554042574	0.067282234
cg18518074	11	64642316	1.16E-06	0.003249797	0.375303395	24.96667705	0.297498096	0.481708912	B4	EHD1	0.439842981	0.499670209	0.059827229
cg21533743	16	87402123	1.17E-06	0.003265785	-0.074307694	24.94823808	0.297509432	0.481727267	B4	FBXO31	0.535761473	0.407225657	-0.128535816
cg21858904	1	55411328	1.18E-06	0.003272054	-0.330744404	24.93622575	0.297516818	0.481739226	B4	NA	0.374544259	0.351043147	-0.023501113
cg26327551	3	15358747	1.20E-06	0.00332092	0.226898887	24.89663676	0.297541163	0.481778645	B4	SH3BP5	0.444277569	0.563567178	0.11928961
cg07790294	19	928287	1.21E-06	0.003324411	0.590457774	24.88654075	0.297547372	0.4817887	B4	ARID3A	0.55046481	0.58972771	0.0392629
cg07815522	3	122282157	1.22E-06	0.003344765	-0.186277666	24.86566673	0.297560212	0.481809489	B4	DTX3L;PARP9	0.731020794	0.669562524	-0.06145827
cg04862328	2	202818890	1.23E-06	0.003358636	-0.432131977	24.84126496	0.297575223	0.481833796	B4	NA	0.077041884	0.07514996	-0.001891925
cg19526722	1	89061160	1.23E-06	0.003358636	-0.279447843	24.84898791	0.297570472	0.481826103	B4	PKN2-AS1	0.167905253	0.164757867	-0.003147386
cg14064762	9	123688745	1.24E-06	0.003363406	0.290810539	24.83049694	0.297581848	0.481844523	B4	TRAF1	0.18320862	0.224432758	0.041224138
cg01434938	14	50833146	1.26E-06	0.003400586	0.452682637	24.79928856	0.297601052	0.481875617	B4	CDKL1	0.698276311	0.723921177	0.025644866
cg01044314	19	2442930	1.26E-06	0.003407616	0.347735958	24.78719844	0.297608492	0.481887665	B4	LMNB2	0.717220429	0.755053369	0.03783294
cg11421485	10	11192344	1.27E-06	0.003420536	0.333571494	24.77146107	0.297618178	0.481903348	B4	CELF2	0.291541438	0.325445868	0.03390443
cg17716338	14	89718478	1.28E-06	0.00342511	0.378821087	24.76098465	0.297624626	0.481913789	B4	FOXN3	0.59734344	0.677348918	0.080005478
cg13588599	9	131102140	1.29E-06	0.003429491	-0.361540938	24.74309519	0.297635639	0.48193162	B4	SLC27A4	0.808554872	0.778469722	-0.03008515
cg14541119	6	140371491	1.29E-06	0.003429491	0.23103985	24.74861438	0.297632241	0.481926119	B4	LOC100507477	0.620586541	0.715557129	0.094970588
cg16663980	1	158809049	1.30E-06	0.003448451	0.281804675	24.72377488	0.297647533	0.48195088	B4	MNDA	0.619482176	0.687117551	0.067635375
cg15283622	2	191208022	1.32E-06	0.003485763	0.605990225	24.69326914	0.297666316	0.481981294	B4	INPP1	0.314545798	0.351882041	0.037336243
cg07808881	14	89974621	1.33E-06	0.003492066	0.288540027	24.68113617	0.297673788	0.481993392	B4	FOXN3	0.768719337	0.819479385	0.050760048
cg26080684	7	72775853	1.33E-06	0.003492066	0.217960726	24.67446889	0.297677894	0.482000041	B4	NA	0.73372387	0.80332689	0.06960302
cg07477602	1	56961319	1.37E-06	0.003554709	-0.491292421	24.61427895	0.29771497	0.482060074	B4	PPAP2B	0.319138268	0.316086664	-0.003051604
cg11474081	8	129234520	1.37E-06	0.003554709	0.390895951	24.61796153	0.297712701	0.4820564	B4	NA	0.546796239	0.555619662	0.008823423
cg22479453	1	110367354	1.36E-06	0.003554709	0.578794006	24.62268755	0.29770979	0.482051686	B4	NA	0.546067475	0.577733652	0.031666176
cg07814318	15	31624584	1.39E-06	0.003591857	0.344832788	24.5847269	0.297733179	0.482089557	B4	KLF13	0.396482029	0.43900731	0.042525281
cg15562569	11	119443838	1.41E-06	0.003638174	0.379671038	24.55004542	0.297754552	0.482124165	B4	NA	0.749931281	0.783753676	0.033822394
cg09291834	15	39873260	1.42E-06	0.003639218	0.481890856	24.54213421	0.297759428	0.48213206	B4	THBS1	0.024267361	0.027887862	0.003620501
cg06188083	10	91093005	1.44E-06	0.003682123	-0.244845517	24.50984133	0.297779334	0.482164293	B4	IFIT3	0.610087649	0.541579274	-0.068508375
cg00969478_BC21	1	78619537	1.50E-06	0.003818763	-0.188432906	24.42483823	0.297831752	0.482249168	C0	IFI44L	0.93336164	0.901920538	-0.031441102
cg20240407	2	198253063	1.52E-06	0.003861413	0.543423664	24.39392416	0.297850823	0.482280046	B4	NA	0.520136955	0.563204227	0.043067272
cg02827175	7	1986245	1.58E-06	0.003962369	-0.294074457	24.31454276	0.297899808	0.482359364	B4	MAD1L1	0.508369428	0.503126844	-0.005242584
cg03037271	17	40548565	1.57E-06	0.003962369	0.356808441	24.31747686	0.297897997	0.482356431	B4	NA	0.47056984	0.537347404	0.066777565
cg15357118	2	128927972	1.58E-06	0.003962369	0.515945642	24.31025512	0.297902455	0.482363649	B4	UGGT1	0.52845686	0.563538014	0.035081154
cg22954836	6	138242678	1.56E-06	0.003962369	0.30035258	24.33130439	0.297889463	0.482342612	B4	NA	0.92343763	0.937668304	0.014230674
cg08238388	17	66301554	1.59E-06	0.003965983	0.294765798	24.30121573	0.297908035	0.482372684	B4	ARSG	0.840275451	0.880951558	0.040676107
cg12461141	11	5710654	1.61E-06	0.0040211	-0.31083825	24.26472104	0.297930565	0.482409165	B4	TRIM22	0.545894911	0.492510739	-0.053384173
cg06967696	19	2625719	1.63E-06	0.004041506	0.587513228	24.24688457	0.297941579	0.482426998	B4	GNG7	0.53636953	0.568225424	0.031855894
cg12174507	1	167603130	1.65E-06	0.004075526	0.435695894	24.21499771	0.297961271	0.482458884	B4	RCSD1	0.628349337	0.676620963	0.048271626
cg23334466	5	134551807	1.65E-06	0.004075526	0.75398077	24.2159991	0.297960652	0.482457882	B4	C5orf66	0.427215575	0.449424862	0.022209287
cg08871005	17	62333513	1.66E-06	0.004083927	0.461555295	24.20363354	0.29796829	0.482470249	B4	TEX2	0.933961988	0.944576438	0.01061445
cg24388175	13	100949858	1.69E-06	0.00413972	0.195158154	24.16776879	0.297990445	0.482506123	B4	PCCA	0.710537796	0.794647364	0.084109568
cg03515040	12	57935396	1.73E-06	0.004213444	0.35033307	24.11674823	0.298021971	0.482557169	B4	DCTN2	0.640271577	0.705991478	0.065719901
cg06697074	7	106710020	1.74E-06	0.004213444	0.266631007	24.10402074	0.298029837	0.482569906	B4	PRKAR2B	0.869720702	0.888236315	0.018515613
cg06805837	8	27748464	1.74E-06	0.004213444	0.282521461	24.1019994	0.298031086	0.482571929	B4	SCARA5	0.786537917	0.81844038	0.031902463
cg12685166	2	175455876	1.74E-06	0.004213444	0.361726221	24.10589569	0.298028678	0.482568029	B4	WIPF1	0.321441868	0.358480864	0.037038996
cg21995613	8	144106922	1.75E-06	0.004213444	-0.254437425	24.09575325	0.298034947	0.48257818	B4	NA	0.812919353	0.739974075	-0.072945279
cg24481177	11	114269501	1.76E-06	0.004237022	0.389126229	24.07705434	0.298046505	0.482596895	B4	C11orf71	0.869020243	0.892012288	0.022992046
cg14366738	2	217542547	1.78E-06	0.004244223	0.303190346	24.05987519	0.298057125	0.482614091	B4	IGFBP5	0.52157541	0.587569406	0.065993997
cg22052026	14	77417199	1.77E-06	0.004244223	0.461817904	24.06100151	0.298056428	0.482612963	B4	NA	0.515374939	0.568467196	0.053092257
cg00488091	6	144536326	1.79E-06	0.004257263	0.712941395	24.04659462	0.298065335	0.482627385	B4	NA	0.315705418	0.354950223	0.039244805
cg14579056	13	97931273	1.79E-06	0.004261572	0.193237189	24.0377134	0.298070826	0.482636277	B4	MBNL2	0.788697199	0.860111129	0.07141393
cg11167160	16	72051243	1.81E-06	0.004289105	-0.526859398	24.01729738	0.298083451	0.482656718	B4	DHODH	0.406487278	0.431672931	0.025185653
cg08761339	14	94576947	1.88E-06	0.00443745	-0.461681015	23.93824607	0.298132347	0.482735891	B4	IFI27	0.951089885	0.932800224	-0.018289662
cg03727207	11	71927844	1.91E-06	0.004444152	0.327297317	23.9019439	0.298154809	0.482772262	B4	FOLR2	0.891811843	0.903708003	0.011896161
cg10369537	9	78834330	1.91E-06	0.004444152	0.435098616	23.90284069	0.298154254	0.482771363	B4	PCSK5	0.320968458	0.367874714	0.046906256
cg25723331	11	44613980	1.91E-06	0.004444152	-0.657256306	23.9079116	0.298151116	0.482766282	B4	CD82	0.321077218	0.341671549	0.020594331
cg26436204	21	47892256	1.91E-06	0.004444152	0.50242355	23.90538608	0.298152679	0.482768812	B4	DIP2A	0.452023397	0.50339737	0.051373972
cg26507821	7	37888364	1.90E-06	0.004444152	0.41922329	23.91978919	0.298143767	0.482754381	B4	NME8	0.893718116	0.895137405	0.001419288
cg03269757	2	38602134	1.93E-06	0.004468758	0.390821053	23.88364154	0.298166136	0.482790602	B4	ATL2	0.910928121	0.922212535	0.011284415
cg21754618	6	106944802	1.95E-06	0.004484561	-0.528019976	23.86308205	0.298178861	0.482811206	B4	NA	0.416683976	0.425549521	0.008865545
cg22883080	22	36841223	1.95E-06	0.004484561	0.314141356	23.86333769	0.298178703	0.48281095	B4	NA	0.722657721	0.763529852	0.040872131
cg12553378	12	105038708	1.98E-06	0.004541303	0.50595567	23.82984596	0.298199436	0.482844521	B4	CHST11	0.387787414	0.432354358	0.044566944
cg27224435	8	134416192	1.99E-06	0.004545435	1.08067429	23.82143821	0.298204641	0.482852949	B4	NA	0.25040722	0.289062661	0.038655441
cg26227957	1	19547285	2.00E-06	0.004555328	0.295574064	23.8103612	0.2982115	0.482864054	B4	KIAA0090	0.561946708	0.63144781	0.069501101
cg02547054	12	48296637	2.00E-06	0.004560225	0.544119373	23.80164259	0.298216898	0.482872796	B4	VDR	0.685208672	0.707616734	0.022408062
cg03084350	3	38065265	2.01E-06	0.004564759	0.583199175	23.79311544	0.298222178	0.482881346	B4	PLCD1	0.576444655	0.599093077	0.022648423
cg03285705	3	188260652	2.04E-06	0.004620557	0.476950069	23.76089073	0.298242136	0.48291366	B4	LPP	0.88926575	0.891027387	0.001761637
cg00504445	5	66712085	2.09E-06	0.004700792	0.318236492	23.71494876	0.298270595	0.482959742	B4	NA	0.490205409	0.544543166	0.054337757
cg06867755	2	225397387	2.10E-06	0.004700792	0.473270405	23.70663213	0.298275748	0.482968085	B4	CUL3	0.400961466	0.470618771	0.069657304
cg07704771	6	89760139	2.10E-06	0.004700792	-0.325452907	23.70523419	0.298276614	0.482969487	B4	NA	0.479540419	0.482755255	0.003214836
cg00969515_BO21	1	78627119	2.11E-06	0.004701448	-0.092005357	23.69232545	0.298284612	0.482982438	C0	IFI44L	0.895421026	0.793609717	-0.101811309
cg06058049	1	212068356	2.11E-06	0.004701448	0.303418995	23.6927452	0.298284352	0.482982017	B4	NA	0.894506548	0.912154945	0.017648397
cg22226197	3	121380526	2.12E-06	0.004702307	0.326925427	23.68565934	0.298288743	0.482989127	B4	HCLS1	0.907857298	0.925292732	0.017435434
cg01328348	1	160839299	2.14E-06	0.004723213	-0.569804192	23.66605456	0.298300892	0.483008799	B4	NA	0.305306299	0.328528213	0.023221914
cg04523826	12	92587036	2.15E-06	0.004723213	0.387717298	23.65751203	0.298306186	0.483017371	B4	NA	0.901373827	0.913537197	0.01216337
cg05647891	4	153346037	2.14E-06	0.004723213	0.228236342	23.66007838	0.298304596	0.483014796	B4	FBXW7	0.629391724	0.729565803	0.100174079
cg08692757	12	24753659	2.16E-06	0.00473047	-0.467157773	23.64804699	0.298312053	0.48302687	B4	NA	0.179510257	0.171838374	-0.007671883
cg00500907	18	21173829	2.19E-06	0.00478564	-0.209183	23.6172297	0.298331155	0.483057801	B4	NA	0.525774863	0.53977816	0.014003298
cg09318880	1	65232182	2.26E-06	0.004939689	0.418389439	23.54287615	0.29837726	0.483132454	B4	RAVER2	0.892041931	0.90747449	0.01543256
cg18194850	3	67699305	2.27E-06	0.004939689	0.217614134	23.53763189	0.298380513	0.48313772	B4	SUCLG2	0.738122193	0.825490245	0.087368052
cg22327832	7	111913258	2.28E-06	0.004951304	-0.553979433	23.52651792	0.298387406	0.483148882	B4	ZNF277	0.651784809	0.619778554	-0.032006254
cg01130991	17	46510392	2.30E-06	0.004956033	0.321116257	23.51374244	0.298395331	0.483161714	B4	NA	0.823008357	0.859230932	0.036222575
cg17445342	4	164395512	2.30E-06	0.004956033	0.331597479	23.51228943	0.298396232	0.483163173	B4	TKTL2	0.676583477	0.733564201	0.056980724
cg00969478_TO21	1	78619537	2.31E-06	0.004958087	-0.134631686	23.50007561	0.298403809	0.483175442	C0	IFI44L	0.889053746	0.838332218	-0.050721528
cg21060789	2	163176242	2.31E-06	0.004958087	-0.478775655	23.49927889	0.298404303	0.483176242	B4	IFIH1	0.947320867	0.931148101	-0.016172767
cg14962159	13	37441585	2.32E-06	0.004960326	0.291487182	23.48969061	0.298410252	0.483185874	B4	SMAD9	0.882010742	0.904946289	0.022935546
cg18088139	20	20248664	2.33E-06	0.004960326	0.43487274	23.4862592	0.298412381	0.483189322	B4	CFAP61	0.676654824	0.709330605	0.032675781
cg01661897	12	4671207	2.38E-06	0.00497356	0.329519436	23.43892845	0.298441751	0.483236877	B4	NA	0.361930593	0.411222573	0.04929198
cg05136628	16	83829916	2.36E-06	0.00497356	0.154996897	23.45454656	0.298432059	0.483221183	B4	CDH13	0.410373413	0.526509506	0.116136094
cg09426038	6	147476199	2.36E-06	0.00497356	0.251582035	23.4579306	0.298429959	0.483217783	B4	STXBP5-AS1	0.835365053	0.882553831	0.047188778
cg12206840	2	136826451	2.37E-06	0.00497356	0.421160187	23.4489166	0.298435552	0.483226841	B4	NA	0.605809722	0.644175359	0.038365637
cg13354241	2	64447091	2.38E-06	0.00497356	0.332140979	23.44022676	0.298440945	0.483235573	B4	NA	0.837910155	0.872423219	0.034513064
cg13783994	14	62066539	2.37E-06	0.00497356	0.319502035	23.44596824	0.298437382	0.483229803	B4	FLJ22447	0.812770367	0.860222089	0.047451723
cg21935981	22	45608465	2.37E-06	0.00497356	0.173373215	23.45037669	0.298434646	0.483225373	B4	C22orf9	0.933929747	0.952160094	0.018230348
cg03110996	2	191883483	2.40E-06	0.00500028	-0.257412924	23.42167216	0.298452461	0.483254219	B4	NA	0.865611267	0.826385236	-0.03922603
cg10383510	15	91245363	2.48E-06	0.005138333	0.632179479	23.35217166	0.298495608	0.483324083	B4	CRTC3-AS1	0.465622162	0.507834463	0.042212301
cg19388268	18	3679451	2.47E-06	0.005138333	0.271177066	23.35522053	0.298493715	0.483321018	B4	DLGAP1	0.785171322	0.820439169	0.035267847
cg00532802	11	121594220	2.49E-06	0.005146222	-0.403420715	23.33726343	0.298504866	0.483339074	B4	NA	0.202410896	0.195222985	-0.007187911
cg01995927	1	24257839	2.49E-06	0.005146222	0.336594929	23.34135095	0.298502328	0.483334963	B4	NA	0.532379031	0.566949257	0.034570226
cg25998594	14	24632095	2.59E-06	0.005334766	-0.269969061	23.25516243	0.298555865	0.483421651	B4	IRF9	0.909416407	0.877099784	-0.032316623
cg25648980	12	51719079	2.63E-06	0.005390111	0.549283041	23.22749972	0.298573054	0.483449484	B4	BIN2	0.334965828	0.403344539	0.06837871
cg09451849	11	10613643	2.81E-06	0.005738565	-0.434946744	23.08325443	0.298662734	0.483594693	B4	MRVI1-AS1;MRVI1	0.296023532	0.313027065	0.017003534
cg16584834	4	144311265	2.81E-06	0.005738565	0.293221829	23.08609438	0.298660968	0.483591833	B4	GAB1	0.486293251	0.554633509	0.068340257
cg03318904	22	39801522	2.91E-06	0.005927213	0.263175035	23.00903156	0.298708911	0.483669463	B4	MAP3K7IP1	0.840949529	0.856745019	0.015795489
cg00937359	6	86350540	2.96E-06	0.005997763	0.529882732	22.97826939	0.298728056	0.483700463	B4	SYNCRIP	0.577849845	0.58691445	0.009064605
cg16597887	5	177815410	2.99E-06	0.006041546	-0.757469933	22.95717669	0.298741185	0.483721721	B4	COL23A1	0.352260048	0.368262619	0.01600257
cg03104970	7	50435337	3.04E-06	0.006139946	0.389112926	22.91730513	0.298766008	0.483761914	B4	IKZF1	0.814662568	0.843708248	0.02904568
cg18655494	20	14542753	3.08E-06	0.006194808	-0.548873705	22.89281804	0.298781256	0.483786604	B4	MACROD2;MACROD2-IT1	0.90690138	0.884489736	-0.022411644
cg09971626	20	3691986	3.10E-06	0.006216223	-0.419763238	22.87986764	0.298789321	0.483799662	B4	NA	0.373651671	0.356171546	-0.017480125
cg09250656	18	8751117	3.11E-06	0.006223648	0.380649028	22.87120856	0.298794714	0.483808395	B4	MTCL1	0.93880412	0.945674191	0.006870071
cg16644494	22	50971601	3.12E-06	0.006223648	-0.238197732	22.86608939	0.298797902	0.483813557	B4	ODF3B	0.86243796	0.830512792	-0.031925168
cg05868799	8	71316869	3.13E-06	0.006230686	-0.442632674	22.8580949	0.298802881	0.48382162	B4	NCOA2	0.147891932	0.150770035	0.002878103
cg03906347	6	109079920	3.14E-06	0.006247106	0.382833379	22.84693936	0.29880983	0.483832871	B4	LINC00222	0.848285573	0.880000573	0.031715
cg06793357	1	244390052	3.22E-06	0.006381795	0.293714723	22.79625331	0.298841408	0.483884003	B4	NA	0.388657082	0.476081162	0.08742408
cg10913394	2	102137177	3.26E-06	0.006449392	-0.341512934	22.76841745	0.298858755	0.48391209	B4	NA	0.662911643	0.645191788	-0.017719855
cg04864378	7	151037217	3.32E-06	0.006520809	0.371012887	22.73125367	0.298881919	0.483949598	B4	NA	0.395993207	0.409525952	0.013532746
cg06883852	18	2650498	3.33E-06	0.006520809	0.266225411	22.72855547	0.298883601	0.483952321	B4	NA	0.896160826	0.922762574	0.026601748
cg22115835_BC21	17	6756799	3.32E-06	0.006520809	-0.277251549	22.73161961	0.298881691	0.483949228	C0	XAF1	0.153827179	0.128843419	-0.024983761
cg23560388	6	155542639	3.36E-06	0.006565813	0.269363303	22.70852054	0.298896091	0.483972545	B4	TIAM2	0.813076086	0.857591488	0.044515401
cg19733255	9	74918970	3.37E-06	0.006567389	0.239041735	22.70253057	0.298899826	0.483978592	B4	LINC01504	0.857079022	0.891111501	0.03403248
cg09439276	16	66554515	3.40E-06	0.006609869	0.474879799	22.68343653	0.298911731	0.483997869	B4	TK2	0.485136618	0.535221818	0.0500852
cg02762945	10	75621858	3.47E-06	0.006723209	-0.958094403	22.64158744	0.29893783	0.484040128	B4	CAMK2G	0.298706714	0.322826252	0.024119538
cg17096111	14	96846027	3.47E-06	0.006723209	0.338660568	22.63662027	0.298940928	0.484045145	B4	GSKIP	0.578198005	0.673473315	0.095275311
cg23699170	12	118832042	3.49E-06	0.006727958	0.37401892	22.62970448	0.298945242	0.48405213	B4	SUDS3	0.922957498	0.932802696	0.009845199
cg05046444	3	193965305	3.50E-06	0.006735997	-0.458864661	22.6212141	0.298950538	0.484060705	B4	LOC100505920;LOC101929337	0.390864698	0.427373839	0.036509142
cg07319071	20	1359422	3.52E-06	0.006735997	0.689326217	22.61099376	0.298956913	0.484071029	B4	FKBP1A-SDCBP2;FKBP1A	0.959942888	0.957412061	-0.002530827
cg26405097	6	15428301	3.52E-06	0.006735997	0.557635248	22.6111928	0.298956789	0.484070828	B4	JARID2	0.352563932	0.385330972	0.03276704
cg12465973	1	64598909	3.53E-06	0.006740799	-0.334307807	22.60412008	0.298961202	0.484077972	B4	ROR1	0.611642858	0.605989421	-0.005653437
cg06067437	16	68572999	3.55E-06	0.006761713	-0.408443968	22.59222258	0.298968624	0.484089991	B4	ZFP90	0.02061689	0.020385884	-0.000231007
cg18377866	3	193965288	3.58E-06	0.006793082	-0.190254529	22.57352114	0.298980293	0.484108885	B4	LOC100505920;LOC101929337	0.895750938	0.882737668	-0.013013271
cg25888758_TC21	21	41450146	3.58E-06	0.006793082	0.48800423	22.57177981	0.29898138	0.484110644	C0	MX1	0.948472826	0.951081178	0.002608352
cg15425763	12	113358846	3.60E-06	0.00679789	0.400919271	22.55990678	0.298988789	0.484122641	B4	NA	0.951915075	0.957040896	0.00512582
cg23558966	2	20522947	3.60E-06	0.00679789	-0.374834741	22.55967318	0.298988934	0.484122877	B4	PUM2	0.762128095	0.700921965	-0.06120613
cg16995606_TC21	13	108268460	3.64E-06	0.006848631	0.301752069	22.53868357	0.299002034	0.484144087	C0	TNFSF13B	0.780456268	0.839654718	0.05919845
cg04086394	1	193082764	3.69E-06	0.006921891	0.319635729	22.51094601	0.299019347	0.48417212	B4	NA	0.933672782	0.942520662	0.008847879
cg16862821	6	32938469	3.71E-06	0.006953643	-0.612227313	22.49602584	0.299028661	0.484187202	B4	BRD2	0.174984131	0.159210144	-0.015773987
cg05658730	2	231579557	3.73E-06	0.0069651	0.371646341	22.48730586	0.299034105	0.484196016	B4	CAB39	0.4409382	0.480834141	0.03989594
cg08398132	2	8557381	3.75E-06	0.006984683	0.349994373	22.47569565	0.299041353	0.484207754	B4	NA	0.462756345	0.559765539	0.097009193
cg24499891	6	25007637	3.76E-06	0.006984683	-0.195818317	22.47092956	0.299044329	0.484212572	B4	FAM65B	0.209884615	0.17250657	-0.037378045
cg17413846	16	25227013	3.77E-06	0.006989608	0.200284836	22.46423655	0.299048508	0.484219339	B4	AQP8	0.76575242	0.834489547	0.068737127
cg05011216	22	43551308	3.80E-06	0.006991629	0.417440251	22.44848701	0.299058343	0.484235263	B4	TSPO	0.739998434	0.776449657	0.036451223
cg09668627	1	1371844	3.80E-06	0.006991629	0.185383255	22.44664179	0.299059495	0.484237129	B4	VWA1	0.694202999	0.747027173	0.052824174
cg11914068	12	132654862	3.79E-06	0.006991629	-0.459109837	22.45298541	0.299055534	0.484230715	B4	NA	0.267570238	0.26617829	-0.001391948
cg23935522	12	77162317	3.81E-06	0.006991629	0.270140018	22.44293454	0.29906181	0.484240878	B4	ZDHHC17	0.697244335	0.766979836	0.069735501
cg19644850	11	62571803	3.93E-06	0.007194239	0.572968097	22.37666849	0.299103202	0.484307899	B4	NXF1	0.45297852	0.470667157	0.017688637
cg22214659	15	91455349	3.94E-06	0.007194239	0.524493326	22.37239041	0.299105875	0.484312226	B4	MAN2A2	0.722904876	0.753356674	0.030451798
cg13373048	3	71892575	3.96E-06	0.007211058	-0.501293537	22.36235035	0.299112147	0.484322384	B4	NA	0.300704196	0.319785115	0.019080919
cg19296486	8	54675468	3.97E-06	0.007212993	0.483659605	22.35547017	0.299116446	0.484329344	B4	ATP6V1H	0.53546904	0.583366361	0.047897321
cg25379837	16	58418405	3.98E-06	0.007212993	0.344698847	22.35159398	0.299118868	0.484333266	B4	NA	0.913507263	0.922459372	0.008952109
cg02643958	2	191726329	4.02E-06	0.007281948	0.475567823	22.32645016	0.299134581	0.484358708	B4	NA	0.554764485	0.61217668	0.057412195
cg00221271	11	85912347	4.04E-06	0.007285878	0.441791989	22.32024845	0.299138457	0.484364983	B4	NA	0.770182341	0.787753466	0.017571125
cg00969515_BC21	1	78627119	4.05E-06	0.007293215	-0.096282398	22.31307446	0.29914294	0.484372243	C0	IFI44L	0.90589845	0.824422007	-0.081476444
cg00954162	20	20284520	4.06E-06	0.007294103	0.269430562	22.30777864	0.29914625	0.484377603	B4	CFAP61	0.851186978	0.868755768	0.01756879
cg15069098	5	96100736	4.12E-06	0.007392874	-0.67615247	22.27439053	0.299167121	0.484411396	B4	CAST;ERAP1	0.966735803	0.960259619	-0.006476184
cg24482293	2	46803238	4.20E-06	0.007502028	0.387627596	22.23847733	0.299189575	0.484447754	B4	LOC100506142;RHOQ	0.768718676	0.808839005	0.040120329
cg12359279	21	42797953	4.23E-06	0.007552285	-0.304923485	22.21940281	0.299201503	0.484467067	B4	MX1	0.070430165	0.05743717	-0.012992995
cg14182166	1	40508568	4.27E-06	0.007595849	0.462239889	22.20229152	0.299212204	0.484484395	B4	CAP1	0.592716953	0.62409054	0.031373587
cg05164144	5	59474020	4.34E-06	0.007703871	0.208610443	22.1675574	0.29923393	0.484519575	B4	PDE4D	0.656158059	0.753301779	0.097143719
cg17348029	2	72151487	4.36E-06	0.007722246	-0.420057744	22.15757396	0.299240176	0.484529687	B4	NA	0.361179709	0.369909802	0.008730093
cg25888264_TC21	21	41420023	4.40E-06	0.007770821	-0.370751234	22.13941088	0.29925154	0.484548088	C0	MX1	0.532677318	0.499429979	-0.033247339
cg17265470	7	135006595	4.43E-06	0.007788874	-0.258330306	22.12465486	0.299260773	0.484563038	B4	NA	0.46280452	0.439828191	-0.02297633
cg19093630	20	3999025	4.42E-06	0.007788874	-0.859458074	22.12669278	0.299259498	0.484560973	B4	NA	0.178933781	0.197097116	0.018163335
cg05253151	6	158506818	4.46E-06	0.007822522	0.328383814	22.11065783	0.299269532	0.48457722	B4	SYNJ2	0.904731971	0.916657641	0.01192567
cg04575476	6	126853160	4.49E-06	0.007869368	0.485842667	22.09317715	0.299280472	0.484594934	B4	NA	0.699784054	0.71077234	0.010988286
cg16758150	4	169796814	4.56E-06	0.007960174	0.352480625	22.06078235	0.299300749	0.484627766	B4	PALLD	0.737533233	0.782001635	0.044468402
cg19411922	8	82012575	4.57E-06	0.007960174	0.188396074	22.05924137	0.299301713	0.484629328	B4	PAG1	0.687115717	0.791498925	0.104383208
cg18038415	8	126553272	4.64E-06	0.008070055	0.344012049	22.02550577	0.299322834	0.484663527	B4	NA	0.603985217	0.642977288	0.038992071
cg26918935	13	108920801	4.75E-06	0.00823668	0.205896237	21.97762637	0.299352817	0.484712076	B4	TNFSF13B	0.840700587	0.892225524	0.051524937
cg19880425	17	28650886	4.88E-06	0.008453788	-0.173104514	21.91802915	0.299390151	0.484772527	B4	TMIGD1	0.117092101	0.087765625	-0.029326476
cg20804756	6	31507857	4.97E-06	0.008588105	0.59779543	21.88003306	0.299413961	0.484811079	B4	BAT1	0.229748197	0.237718928	0.007970731
cg01607862	5	141959716	4.99E-06	0.008598697	0.365019717	21.87262075	0.299418606	0.484818601	B4	NA	0.912189815	0.92159398	0.009404164
cg16795184	16	56777257	5.08E-06	0.008729275	0.579796023	21.83611142	0.29944149	0.484855655	B4	NUP93	0.48958591	0.533280026	0.043694116
cg20995564	2	145172035	5.10E-06	0.008748579	-0.130557002	21.82666965	0.299447409	0.484865239	B4	ZEB2	0.662921076	0.629166304	-0.033754772
cg03663120	7	2284600	5.17E-06	0.00878736	0.201539145	21.79829474	0.299465199	0.484894045	B4	NUDT1	0.941779498	0.952665439	0.01088594
cg07918933	6	72051803	5.16E-06	0.00878736	0.298348739	21.80073626	0.299463668	0.484891566	B4	NA	0.78164582	0.825282676	0.043636856
cg25800166	12	113375896	5.16E-06	0.00878736	-0.362111216	21.80326066	0.299462086	0.484889003	B4	OAS3	0.574963367	0.560227963	-0.014735405
cg27307975	15	58797839	5.17E-06	0.00878736	-0.194465087	21.7995613	0.299464405	0.484892759	B4	LIPC	0.847643352	0.818755046	-0.028888306
cg24597457	7	129028641	5.25E-06	0.008902334	0.341468455	21.76622303	0.299485311	0.48492661	B4	AHCYL2	0.578609699	0.671176145	0.092566446
cg16148346	11	58826475	5.27E-06	0.008920703	-0.272596692	21.75716005	0.299490995	0.484935814	B4	NA	0.931312957	0.914005058	-0.017307899
cg21912872	12	68055270	5.34E-06	0.009016448	0.476773211	21.73000087	0.299508031	0.484963397	B4	DYRK2	0.599147907	0.63583194	0.036684034
cg03842440	12	41831532	5.41E-06	0.009097567	-0.144070808	21.70177294	0.299525739	0.484992071	B4	PDZRN4	0.669029445	0.605676344	-0.063353101
cg14496854	8	98929197	5.41E-06	0.009097567	-0.340116708	21.70229503	0.299525412	0.484991541	B4	MATN2	0.099176685	0.09113388	-0.008042805
cg03750061	10	119131167	5.61E-06	0.009389453	0.345018136	21.62877734	0.299571548	0.485066244	B4	PDZD8	0.638948196	0.670410161	0.031461965
cg04997452	15	39697356	5.61E-06	0.009389453	0.320043025	21.62606151	0.299573252	0.485069005	B4	NA	0.935969927	0.945028808	0.009058881
cg05867050_TC21	3	187366910	5.64E-06	0.009416292	0.548404814	21.61540317	0.299579943	0.485079838	C0	RTP4	0.947152088	0.947604901	0.000452813
cg19697042	15	92080308	5.66E-06	0.009419964	-0.660649523	21.60993202	0.299583377	0.485085399	B4	NA	0.286140408	0.276322632	-0.009817776
cg26768406	17	35446112	5.68E-06	0.009436072	0.478522165	21.60170169	0.299588544	0.485093765	B4	ACACA	0.522686514	0.566264026	0.043577512
cg02976843	17	2843257	5.70E-06	0.009457489	0.411745003	21.59230881	0.299594441	0.485103314	B4	RAP1GAP2	0.489257237	0.538330694	0.049073457
cg23928417	21	16230107	5.74E-06	0.009499871	0.317665443	21.57829759	0.299603239	0.485117558	B4	NA	0.82214694	0.852434547	0.030287607
cg01959774	16	290115	5.76E-06	0.00950842	0.439384966	21.5717983	0.299607319	0.485124166	B4	ITFG3	0.355944144	0.409769902	0.053825758
cg03614664	22	41346948	5.80E-06	0.009557362	-0.526150188	21.55641761	0.299616978	0.485139805	B4	RBX1	0.064340811	0.062874323	-0.001466489
cg02755089	1	114401259	5.85E-06	0.009593974	0.607472523	21.53922055	0.299627778	0.485157292	B4	PTPN22;AP4B1-AS1	0.550071002	0.585879541	0.035808539
cg08485415	11	85954222	5.84E-06	0.009593974	0.363825992	21.54239121	0.299625786	0.485154068	B4	EED	0.876239513	0.889967621	0.013728107
cg26180383	8	129061048	6.02E-06	0.009851408	0.533710356	21.47906666	0.299665564	0.485218476	B4	MIR1207;PVT1	0.624744972	0.635450103	0.010705131
cg19772886	11	109952914	6.04E-06	0.009863857	0.43865472	21.47185832	0.299670093	0.48522581	B4	NA	0.272220914	0.333666044	0.06144513
cg25195424	12	94571192	6.11E-06	0.009915155	0.187550709	21.44735982	0.299685487	0.485250735	B4	PLXNC1	0.771791958	0.836990748	0.065198791
cg25282281	4	154577141	6.10E-06	0.009915155	-0.663002698	21.45089136	0.299683268	0.485247142	B4	NA	0.361803107	0.37358862	0.011785512
cg27469606	19	1154485	6.11E-06	0.009915155	-0.27145952	21.44838754	0.299684841	0.48524969	B4	SBNO2	0.881468302	0.861629768	-0.019838534
cg26559235	19	15203331	6.18E-06	0.010003039	-0.183962744	21.42432567	0.299699963	0.485274175	B4	NA	0.760723616	0.73763124	-0.023092376
cg21616897	2	74612600	6.21E-06	0.010025317	1.035641132	21.41515093	0.29970573	0.485283512	B4	DCTN1;DCTN1-AS1	0.309591788	0.351460122	0.041868334
cg11534391	12	41831486	6.24E-06	0.010065334	-0.166172327	21.40229586	0.29971381	0.485296595	B4	PDZRN4	0.626844245	0.555991198	-0.070853047
cg04369622	14	67119468	6.26E-06	0.010066605	0.271904456	21.39754346	0.299716797	0.485301433	B4	GPHN	0.715531278	0.764135855	0.048604577
cg25888695_BC21	21	41445233	6.32E-06	0.010138223	0.239422892	21.37819457	0.299728961	0.485321128	C0	MX1	0.856213493	0.888512933	0.03229944
cg09008531	16	46695850	6.37E-06	0.01020341	0.261146045	21.36028364	0.299740222	0.485339362	B4	VPS35	0.774938348	0.821607723	0.046669374
cg03364760	1	199138268	6.43E-06	0.010274863	0.293250698	21.34119018	0.299752228	0.485358801	B4	NA	0.666488224	0.698117524	0.0316293
cg04877786	2	111791007	6.48E-06	0.010300244	0.347854455	21.32386767	0.299763121	0.48537644	B4	ACOXL	0.890611529	0.899015714	0.008404185
cg06222419	5	140753491	6.53E-06	0.010300244	-0.351270534	21.30758922	0.299773359	0.485393018	B4	PCDHGB3;PCDHGB2;PCDHGB1;PCDHGA2;PCDHGA3;PCDHGA1;PCDHGA6;PCDHGA4;PCDHGA5	0.271235586	0.244944994	-0.026290592
cg11681597	1	249116587	6.54E-06	0.010300244	0.466389636	21.30611317	0.299774288	0.485394521	B4	SH3BP5L	0.399242462	0.460904105	0.061661643
cg13711762	10	76598375	6.52E-06	0.010300244	0.230931659	21.31209138	0.299770528	0.485388433	B4	KAT6B	0.788524236	0.843336787	0.054812551
cg20448562	2	216994243	6.54E-06	0.010300244	0.370288428	21.30508092	0.299774937	0.485395572	B4	XRCC5	0.439770871	0.515339104	0.075568234
cg25556225	15	31515750	6.53E-06	0.010300244	0.124102461	21.30771265	0.299773282	0.485392892	B4	NA	0.78844737	0.839925574	0.051478204
cg27081704	11	118574745	6.50E-06	0.010300244	0.331223379	21.31837796	0.299766574	0.48538203	B4	NA	0.870934495	0.87697108	0.006036586
cg02332932	10	74607702	6.65E-06	0.010446007	0.325694557	21.2712388	0.299796225	0.485430042	B4	MCU	0.424639206	0.542488018	0.117848812
cg21210021	3	151978579	6.71E-06	0.010530327	0.279180598	21.25001453	0.299809578	0.485451663	B4	NA	0.61743206	0.693235272	0.075803212
cg04751885	21	40386689	6.75E-06	0.010542564	-0.47490531	21.23886513	0.299816593	0.485463022	B4	NA	0.305732912	0.31314879	0.007415878
cg16875121	11	105100761	6.74E-06	0.010542564	0.355304778	21.24251896	0.299814294	0.4854593	B4	NA	0.787187691	0.830073419	0.042885728
cg00771469	14	23260933	6.79E-06	0.010588652	0.37719365	21.22537914	0.29982508	0.485476763	B4	SLC7A7	0.639751167	0.688077096	0.048325929
cg09519218	10	126390317	6.83E-06	0.010627874	1.006367857	21.21329635	0.299832684	0.485489076	B4	FAM53B	0.315727473	0.357644155	0.041916682
cg17843665	13	24351673	6.97E-06	0.01079306	0.324201526	21.17233844	0.299858463	0.485530818	B4	MIPEP	0.738703189	0.75970307	0.020999881
cg22280375	3	69482417	6.97E-06	0.01079306	0.21443962	21.17281186	0.299858165	0.485530335	B4	NA	0.711547021	0.753479427	0.041932406
cg06385226	20	62539841	7.04E-06	0.010883599	0.277859252	21.15053154	0.299872192	0.485553047	B4	DNAJC5	0.824879643	0.864343228	0.039463585
cg11967079	22	24910828	7.12E-06	0.010946839	-0.346407625	21.12553126	0.299887933	0.485578535	B4	UPB1	0.239366937	0.228754362	-0.010612575
cg15964920	13	24753435	7.11E-06	0.010946839	-0.199514344	21.12992815	0.299885164	0.485574052	B4	SPATA13	0.818775698	0.792231812	-0.026543886
cg22437221	5	39203007	7.12E-06	0.010946839	0.426509177	21.12558479	0.299887899	0.48557848	B4	FYB	0.290805829	0.317960137	0.027154309
cg25261361	8	145057101	7.17E-06	0.010983755	-0.397520052	21.1130581	0.299895787	0.485591253	B4	PARP10	0.786213828	0.751348246	-0.034865582
cg25347743	22	30193271	7.18E-06	0.010983755	0.466305891	21.10994886	0.299897745	0.485594423	B4	ASCC2	0.865970824	0.869137827	0.003167002
cg03981685	1	87615654	7.23E-06	0.011047084	0.280717117	21.09365643	0.299908006	0.485611037	B4	LOC339524	0.696852738	0.746788018	0.04993528
cg00552846	11	64017116	7.27E-06	0.011082711	-0.495976803	21.0826705	0.299914925	0.485622241	B4	NA	0.731218801	0.704267117	-0.026951684
cg02061804	17	32453	7.33E-06	0.011132562	-0.150616135	21.06633325	0.299925216	0.485638903	B4	DOC2B	0.58297741	0.507787877	-0.075189533
cg08949269	20	31443298	7.33E-06	0.011132562	0.391961242	21.06481271	0.299926173	0.485640454	B4	NA	0.571249107	0.601689921	0.030440814
cg05660634	15	38965109	7.39E-06	0.01114148	0.296977014	21.04929187	0.299935951	0.485656286	B4	NA	0.428293182	0.489892768	0.061599587
cg13230009	3	11266695	7.40E-06	0.01114148	0.244794123	21.04684089	0.299937495	0.485658786	B4	HRH1	0.640122716	0.680485373	0.040362657
cg17292973_BC21	12	12069996	7.40E-06	0.01114148	0.281519679	21.04683769	0.299937497	0.485658789	C0	BCL2L14	0.894143892	0.9148974	0.020753508
cg20226460	18	60867251	7.40E-06	0.01114148	0.447652993	21.04631947	0.299937823	0.485659318	B4	BCL2	0.119142624	0.137101008	0.017958384
cg05087792	6	116683689	7.46E-06	0.011167771	0.344104539	21.02886189	0.299948822	0.485677127	B4	DSE	0.875998561	0.891673144	0.015674583
cg22983257	5	169739625	7.44E-06	0.011167771	0.529339223	21.03536817	0.299944723	0.48567049	B4	NA	0.59252165	0.609941852	0.017420202
cg24441907	11	117365574	7.45E-06	0.011167771	0.465804724	21.03237956	0.299946606	0.485673539	B4	DSCAML1	0.715623892	0.726504169	0.010880277
cg01172604	20	39212526	7.62E-06	0.011386342	0.4990353	20.98413571	0.299977007	0.485722764	B4	NA	0.68600478	0.687963156	0.001958376
cg17915189	7	43789728	7.69E-06	0.011433567	-0.373818282	20.96476169	0.299989218	0.485742536	B4	NA	0.68659437	0.645529862	-0.041064508
cg18874710	12	50291025	7.70E-06	0.011433567	-0.459555007	20.9630548	0.299990294	0.485744278	B4	FAIM2	0.951618216	0.937768574	-0.013849642
cg19210413	6	65623935	7.69E-06	0.011433567	-0.559163274	20.96500362	0.299989065	0.485742289	B4	EYS	0.945178074	0.933624581	-0.011553493
cg21733756	1	151592397	7.79E-06	0.011546774	0.56956657	20.93831621	0.300005889	0.485769529	B4	SNX27	0.715269881	0.738819742	0.023549861
cg03082902	12	27727207	7.83E-06	0.011586016	-0.278716878	20.92710364	0.300012958	0.485780975	B4	PPFIBP1	0.818161476	0.820651204	0.002489728
cg10744805	10	64262977	7.92E-06	0.011694407	0.313295703	20.9035177	0.300027829	0.485805055	B4	ZNF365	0.876661572	0.897024783	0.020363211
cg03306224	5	10352807	7.97E-06	0.011747023	0.27964462	20.88980239	0.300036478	0.485819059	B4	6-Mar	0.320214774	0.397172483	0.076957709
cg08515817	12	46881377	8.00E-06	0.011747023	0.28833031	20.88185976	0.300041487	0.485827169	B4	LOC100288798	0.71166639	0.756765301	0.04509891
cg19285358	15	74928240	7.99E-06	0.011747023	0.497503093	20.88498764	0.300039514	0.485823975	B4	EDC3	0.396280864	0.455225459	0.058944595
cg01459052	3	47016537	8.04E-06	0.011753965	0.754827483	20.87268588	0.300047272	0.485836538	B4	CCDC12	0.243419269	0.274691449	0.031272179
cg07150145	1	47656137	8.06E-06	0.011753965	-0.802445859	20.86697151	0.300050876	0.485842373	B4	PDZK1IP1	0.281080081	0.286923194	0.005843113
cg20058599	10	101836831	8.07E-06	0.011753965	0.527964821	20.86526894	0.30005195	0.485844112	B4	CPN1	0.799115367	0.806792905	0.007677538
cg25194194	12	69143431	8.07E-06	0.011753965	0.659599525	20.86438003	0.300052511	0.48584502	B4	SLC35E3	0.384855669	0.428087926	0.043232257
cg18205786	3	188286699	8.15E-06	0.011851048	0.301852411	20.84313752	0.30006591	0.485866716	B4	LPP-AS1;LPP	0.396597652	0.461869965	0.065272313
cg04558386	6	13815568	8.21E-06	0.011904201	0.319382381	20.82974728	0.300074357	0.485880393	B4	CCDC90A	0.841582881	0.864627435	0.023044554
cg25451702	2	225440982	8.33E-06	0.012063892	-0.387065774	20.79786323	0.300094473	0.485912965	B4	CUL3	0.077552123	0.079733045	0.002180922
cg24555816	12	47328682	8.39E-06	0.012122291	0.296729724	20.78375199	0.300103378	0.485927383	B4	NA	0.355081737	0.40913327	0.054051533
cg03673687	14	100259804	8.41E-06	0.012134958	-0.395755053	20.77756068	0.300107285	0.48593371	B4	EML1	0.068168358	0.0640393	-0.004129058
cg08845574	5	81055436	8.43E-06	0.012140311	0.319086373	20.77263837	0.300110391	0.48593874	B4	NA	0.787646519	0.821567277	0.033920758
cg12439472	13	43565399	8.56E-06	0.012294495	-0.100100685	20.74226965	0.300129558	0.485969775	B4	EPSTI1	0.627615713	0.52145593	-0.106159783
cg01095328	17	78238779	8.57E-06	0.01229541	-0.421722111	20.73812978	0.300132171	0.485974006	B4	RNF213	0.675279032	0.62498354	-0.050295492
cg24698774	2	61562609	8.74E-06	0.012505859	0.329651587	20.69869141	0.300157069	0.48601432	B4	USP34	0.617086478	0.673889847	0.056803369
cg26850469	3	53051694	8.77E-06	0.012523393	0.412195178	20.69179606	0.300161423	0.48602137	B4	SFMBT1	0.691600459	0.728454537	0.036854078
cg02011576	3	38060265	8.84E-06	0.012609272	0.329420268	20.67355865	0.300172939	0.486040016	B4	PLCD1	0.54856627	0.589281014	0.040714743
cg04986899	16	17553784	8.93E-06	0.012638261	0.245212212	20.65305179	0.300185889	0.486060986	B4	XYLT1	0.871246301	0.895435525	0.024189224
cg06217905	12	113435438	8.92E-06	0.012638261	0.413336796	20.65620959	0.300183895	0.486057757	B4	OAS2	0.955946485	0.959630709	0.003684224
cg10461099	9	123540965	8.93E-06	0.012638261	0.60385855	20.65299689	0.300185924	0.486061042	B4	FBXW2	0.916574977	0.910510202	-0.006064775
cg12430027	12	46615473	8.88E-06	0.012638261	0.432503036	20.6642683	0.300178805	0.486049516	B4	SLC38A1	0.550321484	0.607009111	0.056687627
cg22290528	15	72669149	8.95E-06	0.012647698	0.401356421	20.64751542	0.300189386	0.486066648	B4	HEXA;C15orf34	0.489556112	0.549200265	0.059644153
cg08152411	1	198629993	9.00E-06	0.012683236	0.45657296	20.63774021	0.30019556	0.486076645	B4	PTPRC	0.509611104	0.528726472	0.019115367
cg15370819	19	54379397	9.02E-06	0.012686683	0.476810969	20.63326526	0.300198386	0.486081221	B4	MYADM	0.526920752	0.557018571	0.030097819
cg12030946	1	210034961	9.08E-06	0.012727325	-0.617665443	20.61879333	0.300207528	0.486096023	B4	NA	0.412549802	0.40233098	-0.010218823
cg23055674	7	99954284	9.06E-06	0.012727325	0.932752495	20.62247605	0.300205201	0.486092257	B4	PILRB	0.509176414	0.530791461	0.021615047
cg08871244	16	88848307	9.30E-06	0.013010629	0.372245416	20.56894077	0.300239025	0.486147023	B4	FAM38A	0.139837749	0.150283746	0.010445997
cg26804423	7	8201134	9.33E-06	0.013033488	0.278236902	20.56139933	0.30024379	0.486154739	B4	ICA1	0.681079671	0.730542784	0.049463113
cg01079652	1	79118191	9.45E-06	0.013117982	-0.269027885	20.53420924	0.300260974	0.486182563	B4	IFI44	0.947587145	0.923995279	-0.023591866
cg17364865	3	121380361	9.45E-06	0.013117982	0.533535358	20.53517551	0.300260363	0.486181574	B4	HCLS1	0.418814353	0.470254075	0.051439722
cg21513672	18	53254387	9.46E-06	0.013117982	-0.25688535	20.53247686	0.300262069	0.486184336	B4	TCF4	0.147217584	0.143400499	-0.003817086
cg24338255	4	169140742	9.45E-06	0.013117982	0.397066803	20.5343007	0.300260916	0.48618247	B4	DDX60	0.942486713	0.944889413	0.002402701
cg00018572	13	77386497	9.49E-06	0.013139586	0.276407185	20.52520205	0.300266667	0.486191781	B4	NA	0.902070736	0.915231402	0.013160666
cg00597118	8	103870375	9.61E-06	0.013198507	0.330731982	20.50057512	0.300282234	0.486216988	B4	AZIN1	0.870949999	0.890951673	0.020001675
cg05850338	17	79933123	9.58E-06	0.013198507	0.298528705	20.50713664	0.300278086	0.486210271	B4	NA	0.564303851	0.627876335	0.063572484
cg22753522	11	95065896	9.59E-06	0.013198507	0.240130719	20.50351529	0.300280375	0.486213978	B4	NA	0.617447507	0.702914944	0.085467437
cg25921813	3	194797138	9.60E-06	0.013198507	0.123095349	20.50140443	0.30028171	0.486216139	B4	C3orf21	0.943522919	0.955926146	0.012403227
cg09278021	3	16830243	9.64E-06	0.013223845	0.29718289	20.49276838	0.300287169	0.486224979	B4	NA	0.860844738	0.894440845	0.033596107
cg21061175	8	103836796	9.73E-06	0.013316992	-0.425978013	20.47432473	0.30029883	0.48624386	B4	NA	0.338154147	0.375953802	0.037799655
cg10205767	9	130524835	9.75E-06	0.013325835	1.206112139	20.46914943	0.300302103	0.486249159	B4	SH2D3C	0.31200593	0.353384813	0.041378883
cg05007923	13	49721418	9.85E-06	0.013431925	-0.278146264	20.44882265	0.300314956	0.486269971	B4	FNDC3A	0.704790558	0.666921134	-0.037869424
cg01741041	7	5567862	9.91E-06	0.013442427	0.422466289	20.43611452	0.300322993	0.486282984	B4	ACTB	0.429334581	0.44881799	0.019483409
cg11474175	5	156912109	9.90E-06	0.013442427	1.23290416	20.43876178	0.300321318	0.486280273	B4	ADAM19	0.277787406	0.31947784	0.041690434
cg18572276	9	112860970	9.91E-06	0.013442427	0.505811502	20.43588545	0.300323137	0.486283218	B4	PALM2-AKAP2;AKAP2	0.954656061	0.953452117	-0.001203944
cg16253064	1	180945704	9.96E-06	0.013489262	0.371290335	20.4248752	0.300330101	0.486294494	B4	STX6	0.753961497	0.799484571	0.045523075
cg04897607	18	53243669	1.00E-05	0.013505268	-0.201509823	20.41491224	0.300336402	0.486304697	B4	TCF4	0.70177876	0.704161921	0.002383161
cg06752040	10	14647373	1.00E-05	0.013505268	0.297467173	20.41794588	0.300334484	0.48630159	B4	FAM107B	0.702557639	0.739799026	0.037241387
cg08130658	2	226867170	1.01E-05	0.013507165	0.303301427	20.40343579	0.300343662	0.486316451	B4	NA	0.912749103	0.925445942	0.012696838
cg10722267	3	197608554	1.00E-05	0.013507165	0.222761703	20.40791626	0.300340828	0.486311862	B4	NA	0.702883362	0.75186607	0.048982708
cg21185441	11	73134284	1.00E-05	0.013507165	0.252111552	20.40657783	0.300341674	0.486313233	B4	FAM168A	0.880356487	0.896212824	0.015856337
cg19007952	16	87992718	1.01E-05	0.013594805	0.284578995	20.38623367	0.300354544	0.486334071	B4	BANP	0.921286102	0.926085497	0.004799395
cg08521176	5	74147684	1.02E-05	0.013661951	-0.552945347	20.3722522	0.300363389	0.486348394	B4	FAM169A	0.270618128	0.276751672	0.006133544
cg02845658	13	47188869	1.03E-05	0.013774615	0.519956784	20.35142755	0.300376565	0.486369729	B4	LRCH1	0.922512064	0.927081512	0.004569448
cg25078519	11	111321477	1.04E-05	0.013795398	-0.305893333	20.34459074	0.300380892	0.486376734	B4	NA	0.923737667	0.896777753	-0.026959913
cg05013507	17	35851406	1.04E-05	0.013797515	0.122855627	20.34058416	0.300383427	0.486380839	B4	DUSP14	0.663351449	0.754633045	0.091281596
cg07456681	16	15146876	1.04E-05	0.013798693	0.423193453	20.3367259	0.300385869	0.486384793	B4	NTAN1	0.482888063	0.53694698	0.054058917
cg24606533	1	56973115	1.04E-05	0.013801559	-0.735196441	20.33261938	0.300388467	0.486389001	B4	PPAP2B	0.299618433	0.321447895	0.021829462
cg07477401	17	34445934	1.05E-05	0.013934043	-0.284069496	20.30903757	0.300403392	0.486413167	B4	NA	0.948339693	0.939022849	-0.009316844
cg00123090	1	234667087	1.07E-05	0.014015468	0.397145396	20.28510594	0.30041854	0.486437695	B4	NA	0.769979791	0.787093496	0.017113705
cg06353167	11	2415019	1.07E-05	0.014015468	-0.483129487	20.28281034	0.300419994	0.486440048	B4	CD81	0.861702752	0.826586358	-0.035116394
cg11835978	5	9041061	1.07E-05	0.014015468	0.532655926	20.2807199	0.300421317	0.486442191	B4	SEMA5A	0.90856524	0.90515008	-0.00341516
cg16544734	14	20972508	1.07E-05	0.014015468	0.261026224	20.27955822	0.300422052	0.486443381	B4	NA	0.866182854	0.896291395	0.03010854
cg20693659	1	150736318	1.07E-05	0.014015468	0.253936851	20.27865844	0.300422622	0.486444304	B4	CTSS	0.766505053	0.803910586	0.037405534
cg14222879	8	71316696	1.08E-05	0.014112237	-0.273625191	20.26069186	0.300433996	0.486462721	B4	NCOA2	0.038213563	0.036615355	-0.001598208
cg03076094	16	4357346	1.08E-05	0.01412547	0.600082103	20.25223365	0.300439352	0.486471393	B4	NA	0.339425864	0.366484097	0.027058232
cg21923525	18	9474143	1.08E-05	0.01412547	1.454909845	20.24789541	0.300442099	0.48647584	B4	RALBP1	0.252042503	0.29078164	0.038739138
cg25592685	10	126375711	1.08E-05	0.01412547	0.253169026	20.24858333	0.300441663	0.486475135	B4	FAM53B	0.907304334	0.922951371	0.015647037
cg11206969	18	60006696	1.09E-05	0.014199357	0.513299123	20.23342324	0.300451263	0.486490679	B4	TNFRSF11A	0.288134778	0.333391743	0.045256965
cg18745131	7	1269963	1.11E-05	0.014411197	0.497482987	20.19897744	0.300473077	0.486526001	B4	NA	0.112947353	0.132023825	0.019076472
cg00589699	3	50267754	1.11E-05	0.014429642	0.663263443	20.1927247	0.300477038	0.486532414	B4	GNAI2	0.34112319	0.374579111	0.033455921
cg02284273	10	14051679	1.12E-05	0.014432535	0.141142179	20.1859403	0.300481335	0.486539372	B4	FRMD4A	0.643218484	0.675636317	0.032417833
cg08328225	6	7183048	1.12E-05	0.014432535	0.291167441	20.18514928	0.300481836	0.486540184	B4	RREB1	0.757092521	0.807518406	0.050425886
cg05319638	17	4052668	1.12E-05	0.014454281	0.61152809	20.17844376	0.300486084	0.486547061	B4	CYB5D2	0.706804914	0.730403017	0.023598103
cg02468625	7	77523915	1.12E-05	0.014458437	0.69462407	20.1742816	0.30048872	0.48655133	B4	PHTF2	0.957717968	0.955325964	-0.002392004
cg06470149	17	3561358	1.13E-05	0.014489895	0.30266339	20.16619784	0.300493841	0.486559622	B4	CTNS	0.920417237	0.926710767	0.00629353
cg25250013	19	11302225	1.13E-05	0.014527965	-0.647768444	20.15718245	0.300499553	0.48656887	B4	KANK2	0.571540045	0.552525154	-0.019014892
cg12074299	17	3741782	1.14E-05	0.014622052	0.434009306	20.13668867	0.300512537	0.486589895	B4	C17orf85	0.540971942	0.594880971	0.053909029
cg17098449	22	31364349	1.14E-05	0.014622052	-0.281954849	20.13665668	0.300512558	0.486589928	B4	MORC2;TUG1	0.94125112	0.934386144	-0.006864976
cg13038373	1	192877228	1.15E-05	0.014734797	0.284979053	20.1171314	0.30052493	0.486609961	B4	NA	0.697233192	0.771950933	0.074717741
cg01965939	5	148442694	1.16E-05	0.014764875	-0.868872983	20.10935997	0.300529855	0.486617936	B4	SH3TC2	0.280566247	0.283450464	0.002884218
cg25616055	12	89638890	1.16E-05	0.014792577	0.343590083	20.10193788	0.300534559	0.486625552	B4	NA	0.115065674	0.145715054	0.03064938
cg26918935_BC21	13	108268453	1.17E-05	0.014798252	0.204288771	20.0976257	0.300537292	0.486629977	C0	TNFSF13B	0.844691077	0.893983518	0.049292441
cg05399785	1	3564031	1.17E-05	0.01483922	0.212104684	20.08836291	0.300543163	0.486639483	B4	WDR8	0.772688826	0.825464299	0.052775473
cg02909097	17	2843206	1.18E-05	0.014872605	0.459549193	20.0774874	0.300550056	0.486650645	B4	RAP1GAP2	0.629970479	0.666010331	0.036039852
cg11537510	9	126253131	1.18E-05	0.014872605	0.412668164	20.0766881	0.300550563	0.486651465	B4	DENND1A	0.929771833	0.936408282	0.00663645
cg03100906	16	84637476	1.18E-05	0.014894884	0.264812107	20.06659927	0.300556958	0.48666182	B4	COTL1	0.891037722	0.903305523	0.012267802
cg05271743	1	205216467	1.18E-05	0.014894884	-0.437872171	20.06945412	0.300555148	0.48665889	B4	TMCC2	0.394045183	0.393731173	-0.00031401
cg09310636	14	90760903	1.19E-05	0.014948545	0.38419169	20.05563685	0.300563907	0.486673073	B4	NRDE2	0.556854352	0.623277535	0.066423183
cg13869120	19	7702767	1.20E-05	0.015055507	0.327221933	20.03491824	0.300577043	0.486694342	B4	STXBP2	0.673069756	0.719734599	0.046664843
cg17571286	1	108613442	1.20E-05	0.015055507	0.297010348	20.03386157	0.300577713	0.486695427	B4	NA	0.935877564	0.945037409	0.009159845
cg26039480	22	45984041	1.21E-05	0.015085174	0.417235031	20.02630552	0.300582504	0.486703184	B4	FBLN1	0.745917347	0.76252657	0.016609223
cg21692838	8	61807417	1.21E-05	0.015154648	0.600479092	20.01329078	0.300590756	0.486716547	B4	NA	0.248436886	0.290135635	0.041698749
cg15618517	5	112161949	1.22E-05	0.015199133	0.869710394	20.00374437	0.30059681	0.486726349	B4	APC	0.959223898	0.953885476	-0.005338422
cg03716231	X	23684892	1.23E-05	0.015364051	0.247331827	19.97785047	0.300613232	0.48675294	B4	PRDX4	0.655811404	0.713448702	0.057637298
cg02615905	15	66112205	1.24E-05	0.015422506	0.389400517	19.96469522	0.300621577	0.486766451	B4	NA	0.961933106	0.960853954	-0.001079152
cg04828792	21	42733433	1.24E-05	0.015422506	-0.358520293	19.96308572	0.300622597	0.486768104	B4	MX2	0.910436585	0.891223647	-0.019212938
cg22323734	11	64017337	1.25E-05	0.015497848	-0.495161367	19.94952524	0.3006312	0.486782033	B4	NA	0.484609406	0.467633154	-0.016976253
cg06046714	17	8855356	1.26E-05	0.015536854	0.553269379	19.94087902	0.300636685	0.486790914	B4	PIK3R5	0.960490921	0.959768292	-0.000722629
cg04232816	2	96905390	1.26E-05	0.015542368	0.348487378	19.93672867	0.300639318	0.486795178	B4	LOC285033	0.668676131	0.71382532	0.045149189
cg00633969	3	122284550	1.26E-05	0.015578105	-0.377257396	19.92854563	0.300644509	0.486803584	B4	DTX3L;PARP9	0.963375457	0.957142915	-0.006232542
cg14353998	12	121477219	1.27E-05	0.015588797	-0.304878701	19.92371793	0.300647572	0.486808544	B4	OASL	0.141888398	0.136548233	-0.005340165
cg21124952	12	56544386	1.28E-05	0.015680443	0.281880708	19.90813322	0.300657461	0.486824555	B4	NA	0.569700221	0.628240983	0.058540762
cg25790531	6	113755716	1.28E-05	0.015687457	-0.38944463	19.90381404	0.300660202	0.486828993	B4	NA	0.478767444	0.524844914	0.04607747
cg10929447	16	87401169	1.29E-05	0.015722998	0.224965973	19.89234671	0.300667479	0.486840776	B4	FBXO31	0.695882693	0.725482838	0.029600145
cg20022589	18	21719352	1.29E-05	0.015722998	-0.180535238	19.89459454	0.300666052	0.486838466	B4	CABYR	0.037368294	0.025550807	-0.011817487
cg00889210	16	14280183	1.29E-05	0.015778681	0.260214735	19.88162396	0.300674284	0.486851795	B4	MKL2	0.492686689	0.538422011	0.045735322
cg20306694	12	51718251	1.30E-05	0.015778712	0.463923152	19.87825296	0.300676423	0.486855259	B4	BIN2	0.315994404	0.337272662	0.021278258
cg01297872	6	45674277	1.30E-05	0.015830615	0.348281705	19.86571353	0.300684382	0.486868146	B4	NA	0.613085087	0.656840523	0.043755436
cg15016379	1	55009752	1.30E-05	0.015830615	0.307329507	19.86399905	0.30068547	0.486869908	B4	NA	0.894042225	0.908663402	0.014621177
cg23879504	5	35183225	1.31E-05	0.015830615	0.227693541	19.86135824	0.300687146	0.486872622	B4	PRLR	0.822471035	0.869363183	0.046892148
cg27424960	6	12370276	1.31E-05	0.015871113	-0.468851708	19.85270234	0.300692641	0.486881518	B4	NA	0.418427138	0.42071444	0.002287303
cg26884033	21	47786512	1.32E-05	0.015961608	-0.657759824	19.83754491	0.300702263	0.486897098	B4	PCNT	0.410750283	0.422626457	0.011876174
cg25576801	10	49932245	1.32E-05	0.015962409	-0.63307716	19.834107	0.300704445	0.486900632	B4	WDFY4	0.297321117	0.315978329	0.018657212
cg07810014	6	108918896	1.33E-05	0.01600683	0.38961108	19.82500303	0.300710225	0.48690999	B4	FOXO3	0.761170361	0.798658483	0.037488122
cg07182221	6	37219263	1.34E-05	0.016115879	0.320225493	19.80124087	0.300725312	0.48693442	B4	TMEM217	0.4469451	0.534659957	0.087714857
cg08560387	10	82247853	1.35E-05	0.016115879	0.268596615	19.79763507	0.300727602	0.486938127	B4	TSPAN14	0.071205309	0.092128166	0.020922857
cg15748217	9	110471350	1.35E-05	0.016115879	0.287595518	19.79827753	0.300727194	0.486937466	B4	NA	0.776404752	0.813342416	0.036937664
cg22601524	2	69763115	1.34E-05	0.016115879	0.272139177	19.80544704	0.300722641	0.486930095	B4	AAK1	0.827724346	0.841786298	0.014061951
cg00273504	5	112258552	1.37E-05	0.016301602	0.331309634	19.76723048	0.30074691	0.486969391	B4	REEP5	0.555660222	0.605993071	0.05033285
cg08447387	8	131369596	1.37E-05	0.016301602	0.375144904	19.76871997	0.300745964	0.486967859	B4	ASAP1	0.626751821	0.648820347	0.022068526
cg03339817	2	128458281	1.37E-05	0.016376616	0.167676106	19.75440251	0.300755058	0.486982584	B4	SFT2D3	0.955883499	0.960742372	0.004858873
cg08684511	5	177890047	1.38E-05	0.016447807	0.292476013	19.74210708	0.300762868	0.486995229	B4	COL23A1	0.350297046	0.418750348	0.068453302
cg11058037	11	62229913	1.39E-05	0.016451401	0.717832055	19.73837414	0.300765239	0.486999069	B4	AHNAK	0.462871158	0.468940978	0.00606982
cg22673476	2	233983207	1.39E-05	0.016537423	0.504595598	19.7242675	0.3007742	0.487013579	B4	INPP5D	0.352440627	0.379237489	0.026796862
cg00240598	5	76363946	1.41E-05	0.016676341	0.221562385	19.69834002	0.300790673	0.487040252	B4	NA	0.777843248	0.831332722	0.053489474
cg00725690	16	74560818	1.41E-05	0.016676341	0.202414517	19.69710479	0.300791458	0.487041523	B4	GLG1	0.622659199	0.730675535	0.108016336
cg08511818	20	30104637	1.41E-05	0.016676341	0.343753018	19.69815713	0.300790789	0.48704044	B4	HM13	0.638189153	0.671013871	0.032824719
cg03573679	7	2445727	1.42E-05	0.016744841	-0.332417646	19.68219794	0.30080093	0.48705686	B4	CHST12	0.023178108	0.020373133	-0.002804975
cg18006990	6	43594962	1.42E-05	0.016744841	-0.781155972	19.6820926	0.300800997	0.487056968	B4	GTPBP2	0.433119195	0.429591188	-0.003528007
cg00512563	16	87398040	1.43E-05	0.016798322	0.261612435	19.67222916	0.300807265	0.487067117	B4	FBXO31	0.477447645	0.52768162	0.050233975
cg18187385	17	75149960	1.43E-05	0.016814331	0.173150949	19.66701447	0.300810579	0.487072483	B4	SEC14L1	0.820285986	0.875157289	0.054871303
cg13979618	11	68383973	1.44E-05	0.016846712	0.593200756	19.65978822	0.300815171	0.487079919	B4	NA	0.950561301	0.947623442	-0.002937859
cg14898005	16	28118377	1.45E-05	0.016954393	0.302591344	19.64333368	0.300825629	0.487096853	B4	XPO6	0.947484284	0.95196363	0.004479346
cg17298403	19	15218155	1.45E-05	0.01697248	0.228461115	19.63789904	0.300829084	0.487102447	B4	SYDE1	0.129526999	0.161411076	0.031884078
cg17227300	11	122617067	1.47E-05	0.017106538	0.576925725	19.61835126	0.30084151	0.487122567	B4	UBASH3B	0.537679969	0.537104028	-0.000575941
cg18507060	12	113399046	1.48E-05	0.017253983	-0.323739112	19.59732733	0.300854876	0.487144209	B4	OAS3	0.722609737	0.655701463	-0.066908274
cg06036380	9	35569742	1.49E-05	0.017272346	-0.479624766	19.58068887	0.300865455	0.487161339	B4	NA	0.316423059	0.360809297	0.044386238
cg11502375	19	4540550	1.50E-05	0.017272346	-0.50156997	19.57914326	0.300866438	0.48716293	B4	LRG1	0.234446736	0.254873233	0.020426497
cg11682697	1	56992372	1.49E-05	0.017272346	0.415342421	19.58612331	0.300861999	0.487155744	B4	PPAP2B	0.505106479	0.539982463	0.034875983
cg18615437	10	106094821	1.49E-05	0.017272346	0.458959032	19.58210807	0.300864552	0.487159878	B4	ITPRIP	0.695788382	0.722118295	0.026329912
cg22083904	17	80480960	1.49E-05	0.017272346	0.463909031	19.59132048	0.300858695	0.487150393	B4	FOXK2	0.470588814	0.522319604	0.051730791
cg00402559	19	2566449	1.50E-05	0.017311631	-0.198714856	19.57124832	0.300871458	0.487171059	B4	GNG7	0.78226022	0.767794599	-0.014465621
cg06128826	1	180946766	1.51E-05	0.017372452	0.303323817	19.5544597	0.300882134	0.487188346	B4	STX6	0.785473402	0.821054191	0.035580788
cg07779484	3	49435172	1.51E-05	0.017372452	0.492674954	19.55472974	0.300881963	0.487188068	B4	RHOA	0.516759925	0.553856353	0.037096428
cg23434216	1	9291085	1.51E-05	0.017372452	-0.395558262	19.55702455	0.300880503	0.487185705	B4	NA	0.280712526	0.27798493	-0.002727597
cg20141108	1	165907859	1.53E-05	0.017514286	0.432314677	19.5344288	0.300894874	0.487208975	B4	NA	0.427339773	0.472398827	0.045059054
cg06617834	4	54942790	1.54E-05	0.017575601	0.381000869	19.52402341	0.300901493	0.487219691	B4	NA	0.593836266	0.648513165	0.054676899
cg11643402	7	100267838	1.55E-05	0.017661364	0.430857946	19.51077513	0.30090992	0.487233337	B4	NA	0.58960258	0.642623341	0.053020761
cg21432462	13	114263737	1.56E-05	0.01776979	-0.63621218	19.49493462	0.300919998	0.487249654	B4	TFDP1	0.340639829	0.363999099	0.02335927
cg00605470	11	1776688	1.56E-05	0.017780367	-0.68805993	19.49056021	0.300922781	0.487254161	B4	CTSD	0.471225444	0.472272823	0.001047379
cg23473850	8	29223826	1.57E-05	0.017866807	0.389793157	19.47423592	0.300933167	0.487270978	B4	NA	0.790409939	0.801998731	0.011588792
cg26177760	6	31507785	1.57E-05	0.017866807	0.393499761	19.47549979	0.300932363	0.487269676	B4	BAT1	0.522112703	0.546169678	0.024056975
cg06753787	2	220074208	1.58E-05	0.017875939	-0.76450077	19.46702741	0.300937754	0.487278405	B4	ZFAND2B	0.440397722	0.446101817	0.005704095
cg07637989	5	142871584	1.58E-05	0.017875939	0.264650179	19.46692965	0.300937816	0.487278506	B4	NA	0.857210943	0.887499293	0.03028835
cg13127478	3	55385070	1.59E-05	0.017921432	0.191188858	19.45854277	0.300943153	0.487287148	B4	NA	0.821822883	0.85202542	0.030202537
cg24392753	2	174025831	1.60E-05	0.018081598	-0.530935321	19.4369824	0.300956874	0.487309365	B4	ZAK	0.361570309	0.39985973	0.038289421
cg07298772	2	176306492	1.61E-05	0.01812181	0.256279903	19.42927036	0.300961782	0.487317312	B4	NA	0.60433938	0.69365736	0.08931798
cg13240204	13	74276630	1.61E-05	0.0181242	0.23837962	19.4258955	0.30096393	0.48732079	B4	KLF12	0.507779609	0.59089051	0.083110901
cg20259191	17	55059920	1.61E-05	0.018142365	0.258350081	19.42072192	0.300967223	0.487326122	B4	SCPEP1	0.856136171	0.890433805	0.034297634
cg19633645	15	76428015	1.62E-05	0.018158006	0.180549356	19.41454326	0.300971156	0.48733249	B4	C15orf27	0.764207657	0.812655108	0.048447451
cg21789367	7	45038325	1.62E-05	0.018158006	0.308742146	19.41275603	0.300972294	0.487334332	B4	CCM2	0.954320546	0.959621167	0.005300621
cg26988922	16	709298	1.62E-05	0.01817082	-0.559488655	19.4082109	0.300975187	0.487339017	B4	WDR90	0.778002672	0.751478831	-0.026523841
cg26899367	17	32399	1.63E-05	0.018219126	-0.394066598	19.39962938	0.30098065	0.487347863	B4	DOC2B	0.339290738	0.338241044	-0.001049694
cg15112223	2	153323898	1.65E-05	0.018404767	0.33007351	19.37554283	0.300995984	0.487372692	B4	FMNL2	0.543352678	0.611927462	0.068574784
cg00552529	2	20097827	1.66E-05	0.01843394	0.321489787	19.36919199	0.301000028	0.48737924	B4	TTC32	0.939991944	0.946141797	0.006149854
cg06422146	16	70488547	1.66E-05	0.018509858	0.39190475	19.35761079	0.301007402	0.48739118	B4	FUK	0.019800632	0.024381401	0.004580769
cg26121789	19	56123855	1.68E-05	0.018635601	0.242745674	19.34052191	0.301018284	0.4874088	B4	ZNF865	0.696708099	0.753037674	0.056329575
cg05352995	8	48236231	1.69E-05	0.018744286	0.457285447	19.32541848	0.301027903	0.487424375	B4	SPIDR	0.939355344	0.94294523	0.003589886
cg14155388	9	92087586	1.70E-05	0.018846115	0.37289802	19.30809967	0.301038934	0.487442236	B4	SEMA4D	0.892243833	0.906714577	0.014470744
cg20195799	4	37395903	1.70E-05	0.018846115	0.35213775	19.31049055	0.301037411	0.48743977	B4	NWD2	0.908670952	0.917518494	0.008847542
cg00349493	2	131566727	1.71E-05	0.018868137	-0.449542717	19.30264023	0.301042411	0.487447867	B4	NA	0.582873273	0.568758097	-0.014115176
cg04184571	5	158647548	1.72E-05	0.018911104	0.275806836	19.28581354	0.30105313	0.487465223	B4	NA	0.52145017	0.612489319	0.091039149
cg11445178	1	59441766	1.72E-05	0.018911104	0.456087812	19.29438293	0.301047671	0.487456384	B4	NA	0.503546766	0.543629269	0.040082503
cg16071100	6	112042311	1.72E-05	0.018911104	0.397816589	19.28673797	0.301052541	0.487464269	B4	FYN	0.853548587	0.864339606	0.01079102
cg17965614	16	66623309	1.72E-05	0.018911104	0.46200557	19.29025122	0.301050303	0.487460646	B4	NA	0.78422606	0.790560759	0.006334698
cg19591392	21	27513218	1.73E-05	0.018926134	0.226535485	19.2811505	0.301056101	0.487470033	B4	APP	0.821418906	0.868444687	0.047025781
cg22232952	19	10206625	1.73E-05	0.018980245	-0.207805215	19.27190426	0.301061992	0.487479571	B4	ANGPTL6	0.518257546	0.489838537	-0.028419008
cg27389255	11	14664598	1.74E-05	0.018980245	0.428640318	19.26921549	0.301063705	0.487482345	B4	PSMA1;PDE3B	0.667084321	0.695957423	0.028873103
cg17294228	3	14865505	1.76E-05	0.019175283	-0.421851684	19.24503791	0.30107911	0.487507289	B4	FGD5	0.310220723	0.313272459	0.003051736
cg02587214	14	93130392	1.76E-05	0.019223136	0.407152149	19.23687712	0.30108431	0.48751571	B4	RIN3	0.677309639	0.707327073	0.030017434
cg01324489	21	40114053	1.77E-05	0.019257371	0.302571708	19.22718306	0.301090488	0.487525713	B4	LINC00114	0.78810099	0.814794094	0.026693103
cg02176715	17	3183482	1.78E-05	0.019257371	-0.23159611	19.22124012	0.301094275	0.487531845	B4	OR3A2	0.394392529	0.387753254	-0.006639275
cg08369401	14	93119896	1.77E-05	0.019257371	0.568037944	19.22524176	0.301091725	0.487527716	B4	RIN3	0.213633648	0.238310497	0.024676849
cg14491465	6	18265778	1.78E-05	0.019257371	0.694678897	19.22368383	0.301092718	0.487529323	B4	DEK	0.428758991	0.459942685	0.031183694
cg08352115	17	66356057	1.80E-05	0.019439796	0.316523082	19.19874158	0.301108615	0.487555064	B4	ARSG	0.634649193	0.667958798	0.033309605
cg06973176	5	1067634	1.80E-05	0.019463353	-0.473361176	19.19000135	0.301114186	0.487564085	B4	SLC12A7	0.837209499	0.817302121	-0.019907379
cg11468085	11	67435577	1.80E-05	0.019463353	0.275542349	19.19315587	0.301112176	0.487560829	B4	ALDH3B2	0.525561541	0.538191275	0.012629734
cg17109681	22	38136648	1.81E-05	0.019463353	0.266353267	19.1843704	0.301117776	0.487569897	B4	TRIOBP	0.794567679	0.813602319	0.01903464
cg18589209	20	48367340	1.81E-05	0.019463353	0.540392464	19.18577357	0.301116881	0.487568449	B4	NA	0.609373684	0.623687204	0.014313521
cg02421202	1	185600068	1.82E-05	0.019505026	0.497339542	19.17698753	0.301122482	0.487577518	B4	NA	0.95732706	0.958679166	0.001352106
cg13658000	14	24569206	1.83E-05	0.019585733	0.320335492	19.16548924	0.301129813	0.487589387	B4	PCK2	0.760246005	0.779084133	0.018838129
cg19931529	2	64072167	1.83E-05	0.019623038	0.262274712	19.15860403	0.301134202	0.487596495	B4	UGP2	0.883551289	0.910979627	0.027428339
cg10549916	4	95972631	1.84E-05	0.019628452	-0.366041615	19.1550908	0.301136442	0.487600122	B4	BMPR1B	0.941357353	0.921512084	-0.019845269
cg00526281	11	48101308	1.87E-05	0.019856591	0.280906977	19.11944964	0.301159169	0.487636921	B4	PTPRJ	0.64230841	0.698094681	0.055786272
cg06625767	5	176836695	1.86E-05	0.019856591	-0.55403614	19.1262558	0.301154829	0.487629893	B4	F12	0.36136433	0.366457275	0.005092945
cg15882664	16	2236268	1.87E-05	0.019856591	0.539444847	19.12116197	0.301158077	0.487635153	B4	CASKIN1	0.977288153	0.974710442	-0.00257771
cg25069807	17	76171191	1.86E-05	0.019856591	-0.07148267	19.12399803	0.301156268	0.487632224	B4	TK1	0.951785657	0.900287766	-0.051497891
cg15723956	2	30332822	1.87E-05	0.019904691	-0.749681449	19.11152247	0.301164224	0.487645107	B4	NA	0.294759734	0.296552938	0.001793204
cg16879432	19	33786219	1.88E-05	0.019907219	-0.287014463	19.10834331	0.301166252	0.48764839	B4	NA	0.840585279	0.831162242	-0.009423038
cg00098369	7	20007713	1.88E-05	0.019916978	-0.28440875	19.10095509	0.301170964	0.487656019	B4	LOC101927668	0.933454677	0.921084591	-0.012370086
cg12461347	10	74321670	1.88E-05	0.019916978	0.374632513	19.10389496	0.301169089	0.487652983	B4	MICU1	0.295340823	0.337768614	0.042427791
cg26164761	2	169055243	1.89E-05	0.019916978	0.195022939	19.09860483	0.301172463	0.487658447	B4	STK39	0.728092663	0.808071669	0.079979006
cg26957356	17	38463355	1.89E-05	0.019977352	0.321057981	19.08944278	0.301178307	0.487667909	B4	NA	0.925423245	0.921384857	-0.004038388
cg01342981	2	127415063	1.93E-05	0.020084051	-0.338889879	19.05537302	0.301200041	0.4877031	B4	GYPC	0.069331263	0.061205482	-0.00812578
cg06689758	2	207847420	1.91E-05	0.020084051	0.396465214	19.06939108	0.301191098	0.48768862	B4	NA	0.711914641	0.727331954	0.015417313
cg11031945	12	56520954	1.91E-05	0.020084051	1.345444633	19.07350243	0.301188475	0.487684373	B4	ESYT1	0.264162702	0.299679496	0.035516794
cg15880456	3	150607040	1.92E-05	0.020084051	0.197625046	19.05772269	0.301198542	0.487700673	B4	NA	0.636978397	0.705635886	0.068657489
cg17656426	19	2137788	1.92E-05	0.020084051	-0.471755676	19.05835072	0.301198141	0.487700024	B4	AP3D1	0.698730363	0.705773635	0.007043273
cg18888234	1	12916036	1.92E-05	0.020084051	-0.375109306	19.06057426	0.301196722	0.487697727	B4	PRAMEF2	0.951901665	0.936408651	-0.015493014
cg22257008	6	113754264	1.92E-05	0.020084051	-1.050787073	19.06577114	0.301193407	0.487692359	B4	NA	0.26107565	0.288574252	0.027498602
cg22505006	1	154981829	1.93E-05	0.020084051	0.419062921	19.05591351	0.301199696	0.487702542	B4	ZBTB7B	0.369697295	0.401688718	0.031991423
cg08673532	16	87422913	1.93E-05	0.020129399	0.410273519	19.04784491	0.301204844	0.487710877	B4	FBXO31	0.906428921	0.915928722	0.0094998
cg12310881	18	60905355	1.96E-05	0.020315672	0.295380341	19.01738335	0.30122428	0.487742349	B4	BCL2	0.821836236	0.859658826	0.03782259
cg22090525	10	12078334	1.96E-05	0.020315672	0.299275866	19.02300382	0.301220694	0.487736542	B4	UPF2	0.659516015	0.70231459	0.042798575
cg22401657	5	156536396	1.96E-05	0.020315672	-0.432327881	19.0178647	0.301223973	0.487741852	B4	HAVCR2	0.814313388	0.780962078	-0.03335131
cg23731663	1	26825530	1.96E-05	0.020315672	0.317206729	19.02246943	0.301221035	0.487737094	B4	NA	0.413669811	0.458836543	0.045166733
cg26633168	10	100140714	1.96E-05	0.020318477	0.332919669	19.01425518	0.301226277	0.487745581	B4	NA	0.957385097	0.95870415	0.001319053
cg19357305	20	32232347	1.98E-05	0.020411492	0.314566193	19.00197173	0.301234116	0.487758274	B4	CBFA2T2	0.975199178	0.977106238	0.00190706
cg04350136	6	30616105	1.99E-05	0.020503796	0.414513728	18.98980768	0.301241879	0.487770845	B4	C6orf136	0.937016476	0.941908206	0.00489173
cg03451760	1	197924256	2.00E-05	0.02052852	0.261069611	18.98165913	0.30124708	0.487779266	B4	NA	0.688824374	0.766335058	0.077510684
cg13936938	10	114708973	1.99E-05	0.02052852	-0.426982408	18.98393444	0.301245628	0.487776915	B4	TCF7L2	0.104804353	0.101763234	-0.003041119
cg24379742	3	194397111	2.00E-05	0.020556882	0.319034161	18.97598206	0.301250704	0.487785134	B4	NA	0.896845572	0.90667258	0.009827008
cg22455529	17	73495353	2.00E-05	0.020557789	-0.197810139	18.97307227	0.301252561	0.487788141	B4	KIAA0195	0.843178661	0.811973734	-0.031204927
cg04022194	4	8317995	2.02E-05	0.020668304	0.489767641	18.95917366	0.301261433	0.487802507	B4	NA	0.707339803	0.718723059	0.011383256
cg04445427	8	133699791	2.03E-05	0.020728485	0.251663517	18.95035258	0.301267065	0.487811625	B4	NA	0.549285333	0.629688448	0.080403115
cg10836059	22	43322007	2.03E-05	0.020765609	0.258096302	18.94384719	0.301271218	0.48781835	B4	PACSIN2	0.866878299	0.895191923	0.028313624
cg02386875	17	28927378	2.05E-05	0.02079977	0.126168814	18.93034465	0.301279839	0.487832309	B4	LRRC37B2	0.026119815	0.040774243	0.014654429
cg10076951	16	90072776	2.04E-05	0.02079977	0.471342648	18.93190928	0.30127884	0.487830691	B4	DBNDD1	0.727539732	0.738911672	0.011371941
cg12020957	3	37534565	2.05E-05	0.02079977	-0.819511198	18.92507749	0.301283202	0.487837755	B4	ITGA9	0.328883946	0.352086378	0.023202432
cg14321810	4	36292218	2.05E-05	0.02079977	0.342455013	18.92787979	0.301281412	0.487834857	B4	DTHD1	0.670838963	0.739972884	0.069133921
cg18448767	16	27654341	2.04E-05	0.02079977	-0.291456124	18.93161557	0.301279027	0.487830995	B4	KIAA0556	0.63130452	0.614160127	-0.017144393
cg25605773	4	140443230	2.05E-05	0.02079977	0.296829353	18.92369068	0.301284087	0.487839188	B4	SETD7	0.901253581	0.912461849	0.011208268
cg12104982	19	5592815	2.06E-05	0.020819801	0.195536287	18.91892152	0.301287133	0.487844119	B4	SAFB2	0.938362993	0.944583273	0.006220281
cg02314339	10	91020653	2.06E-05	0.020833349	-0.283594409	18.91412851	0.301290193	0.487849075	B4	NA	0.650322879	0.618577197	-0.031745682
cg15223598	1	150588456	2.06E-05	0.020833349	0.255916904	18.91202891	0.301291534	0.487851246	B4	NA	0.721750721	0.7670982	0.045347479
cg03607951	1	79085586	2.07E-05	0.020903712	-0.172835651	18.90229258	0.301297751	0.487861313	B4	IFI44L	0.487669562	0.450605395	-0.037064167
cg18254848	19	40227949	2.09E-05	0.020992698	0.354245966	18.89075001	0.301305123	0.487873249	B4	CLC	0.920258793	0.929936499	0.009677707
cg13328415	X	13034341	2.10E-05	0.021083756	0.441311474	18.87904609	0.301312598	0.487885353	B4	NA	0.598249841	0.621809454	0.023559614
cg02167757	16	48395953	2.11E-05	0.021132133	0.376634187	18.87155394	0.301317383	0.487893101	B4	SIAH1	0.822590627	0.844549816	0.021959189
cg06984345	14	75162215	2.14E-05	0.021403176	0.299841828	18.84247184	0.301335961	0.487923182	B4	AREL1	0.793994303	0.826501411	0.032507109
cg07103415	16	67424843	2.14E-05	0.021404385	0.550182905	18.83362673	0.301341611	0.487932331	B4	TPPP3	0.561558072	0.596459894	0.034901822
cg12644034	19	17652391	2.14E-05	0.021404385	-0.227489782	18.8368564	0.301339548	0.48792899	B4	FAM129C	0.425259573	0.406975721	-0.018283852
cg13034459	5	139536887	2.15E-05	0.021404385	-0.348753937	18.83230553	0.301342456	0.487933698	B4	LOC101929719	0.058832341	0.053529002	-0.005303339
cg18283844	1	114495894	2.15E-05	0.021404385	0.309351509	18.83138211	0.301343045	0.487934654	B4	HIPK1	0.899658397	0.911871679	0.012213282
cg07044526	16	83847549	2.15E-05	0.021451276	0.282975595	18.82412795	0.30134768	0.487942158	B4	NA	0.893686709	0.910169354	0.016482645
cg15901598	2	113478871	2.17E-05	0.021544088	0.338719646	18.81248072	0.301355122	0.487954208	B4	NA	0.537531834	0.571778152	0.034246318
cg24365676	2	201922108	2.17E-05	0.021574265	0.246286475	18.80686332	0.301358712	0.48796002	B4	FAM126B	0.878126956	0.906998078	0.028871122
cg06500418	2	174025843	2.18E-05	0.021574343	-0.517454713	18.79869822	0.301363929	0.487968468	B4	ZAK	0.344071608	0.381289625	0.037218016
cg18624512	6	151248413	2.18E-05	0.021574343	0.200061164	18.8006789	0.301362664	0.487966419	B4	MTHFD1L	0.453328646	0.545712925	0.092384279
cg23606722	12	133319848	2.18E-05	0.021574343	0.265987968	18.80172906	0.301361992	0.487965332	B4	ANKLE2	0.726393128	0.805795522	0.079402394
cg15593714	17	34309173	2.20E-05	0.021753574	0.503743221	18.77890173	0.301376581	0.487988953	B4	CCL16	0.616483418	0.631980908	0.01549749
cg17852026	10	31077499	2.21E-05	0.021759135	-0.442448755	18.77366829	0.301379925	0.487994369	B4	NA	0.217832628	0.20397088	-0.013861748
cg26959655	8	103379529	2.21E-05	0.021759135	0.520334121	18.77296149	0.301380377	0.487995101	B4	UBR5	0.361928167	0.406298872	0.044370706
cg02019746	12	53254214	2.21E-05	0.021764996	-0.431655397	18.76970455	0.301382459	0.487998471	B4	NA	0.800459895	0.783225086	-0.017234809
cg00637104	20	1785303	2.23E-05	0.021862479	-0.523386886	18.74971029	0.301395239	0.488019165	B4	NA	0.298295182	0.329514438	0.031219256
cg07873060	11	68474523	2.23E-05	0.021862479	-0.489276966	18.75185552	0.301393867	0.488016945	B4	NA	0.440839396	0.426722882	-0.014116514
cg11399589	20	36147549	2.23E-05	0.021862479	-0.697825161	18.75308993	0.301393078	0.488015667	B4	BLCAP	0.522030794	0.525539012	0.003508218
cg22490365	16	85948856	2.23E-05	0.021862479	0.714687537	18.74983531	0.301395159	0.488019035	B4	IRF8	0.344161504	0.378602182	0.034440678
cg04502834	4	26220119	2.25E-05	0.021950596	0.275316336	18.73604408	0.301403975	0.488033311	B4	NA	0.780615802	0.807845336	0.027229533
cg04649041	4	169231710	2.25E-05	0.021950596	0.575546296	18.73718301	0.301403247	0.488032132	B4	DDX60	0.959685278	0.958771332	-0.000913946
cg16744143	3	52713851	2.26E-05	0.022011032	0.288998815	18.72769261	0.301409314	0.488041956	B4	PBRM1	0.771408811	0.812720771	0.04131196
cg17354858	9	37371322	2.26E-05	0.022033798	0.27489098	18.72288651	0.301412387	0.488046931	B4	NA	0.362663937	0.427543325	0.064879389
cg09837467	1	183523933	2.28E-05	0.022108051	0.317205027	18.71060869	0.301420237	0.488059642	B4	NA	0.363702859	0.422085831	0.058382973
cg12495996	10	132239568	2.27E-05	0.022108051	0.157815645	18.71228098	0.301419167	0.48805791	B4	NA	0.865592057	0.903123956	0.037531899
cg25301641	3	151895735	2.29E-05	0.022189593	0.400698041	18.70034867	0.301426797	0.488070264	B4	NA	0.895582284	0.901528875	0.005946592
cg07180353	6	157801149	2.29E-05	0.022198121	-0.487843686	18.69689777	0.301429004	0.488073837	B4	ZDHHC14	0.065017867	0.065555884	0.000538016
cg08062215	6	134785219	2.30E-05	0.022219136	0.184800532	18.69229046	0.30143195	0.488078607	B4	LINC01010;LOC101928231	0.839472453	0.880003702	0.040531249
cg16766036	13	114800309	2.30E-05	0.022260979	0.323023321	18.68542868	0.301436338	0.488085712	B4	RASA3	0.957442801	0.957447295	4.49E-06
cg22639561	5	153451974	2.31E-05	0.022260979	-0.422007325	18.68310928	0.301437821	0.488088114	B4	NA	0.105667625	0.094072448	-0.011595177
cg14756514	11	847547	2.34E-05	0.022515538	-0.40692894	18.65700297	0.301454517	0.488115149	B4	TSPAN4	0.901253319	0.886752047	-0.014501272
cg06717097	16	84103349	2.35E-05	0.02255547	0.293264024	18.64808232	0.301460223	0.488124388	B4	MBTPS1	0.332051256	0.398857813	0.066806557
cg10469383	20	20243713	2.35E-05	0.02255547	-0.428541047	18.64807008	0.301460231	0.4881244	B4	CFAP61	0.364673519	0.395049046	0.030375527
cg15434896	5	79782956	2.35E-05	0.022589222	0.30434288	18.64235175	0.301463889	0.488130323	B4	FAM151B	0.908334409	0.923169538	0.01483513
cg25956106	10	47696803	2.37E-05	0.022681887	0.265238508	18.63127633	0.301470973	0.488141795	B4	ANTXRL	0.831075268	0.857470627	0.026395359
cg07351262	1	110198909	2.38E-05	0.022762649	0.180500011	18.62131783	0.301477344	0.48815211	B4	GSTM4	0.073499393	0.113731835	0.040232442
cg00858078	17	80540329	2.39E-05	0.022795997	0.244056383	18.6130558	0.30148263	0.488160669	B4	FOXK2	0.81962041	0.860017535	0.040397126
cg14766524	5	68663909	2.38E-05	0.022795997	0.326787578	18.61482725	0.301481497	0.488158834	B4	RAD17;AK6;TAF9	0.837212395	0.861338571	0.024126176
cg15107286	17	28194734	2.40E-05	0.022918903	0.230526088	18.59934885	0.3014914	0.488174869	B4	SSH2	0.900252179	0.922744084	0.022491905
cg19751789	19	11199944	2.41E-05	0.022936373	-0.25970617	18.58994997	0.301497414	0.488184607	B4	LDLR	0.098085343	0.085315949	-0.012769395
cg21104869	13	76079856	2.41E-05	0.022936373	0.349939146	18.59124994	0.301496582	0.48818326	B4	NA	0.875839914	0.884297623	0.008457709
cg23852535	17	8857258	2.41E-05	0.022936373	0.354865605	18.59203457	0.30149608	0.488182447	B4	PIK3R5	0.927430634	0.937636789	0.010206155
cg02475528	11	72806692	2.42E-05	0.022946347	0.369460612	18.58385175	0.301501316	0.488190925	B4	FCHSD2	0.921479217	0.925143471	0.003664254
cg02648589	13	114877260	2.42E-05	0.022946347	0.270561328	18.58575112	0.301500101	0.488188957	B4	RASA3	0.375649073	0.438413004	0.062763932
cg07013541	2	226925347	2.44E-05	0.023011004	0.238480875	18.56915902	0.301510718	0.488206149	B4	NA	0.820905401	0.84867299	0.027767589
cg18400471	20	48885160	2.44E-05	0.023011004	0.354893783	18.56768591	0.301511661	0.488207676	B4	LINC01272	0.823130337	0.843168275	0.020037938
cg23761075	20	39693246	2.43E-05	0.023011004	0.486279048	18.57214951	0.301508805	0.488203051	B4	TOP1	0.944807881	0.942924727	-0.001883154
cg24318575	19	40865255	2.43E-05	0.023011004	0.323374752	18.5753674	0.301506745	0.488199716	B4	PLD3	0.928415625	0.93488037	0.006464744
cg19452202	15	80503626	2.44E-05	0.023034396	0.246266853	18.56300824	0.301514655	0.488212523	B4	LINC01314	0.876506205	0.904343769	0.027837563
cg01126481	6	45508422	2.45E-05	0.023047432	0.324359614	18.55926244	0.301517052	0.488216405	B4	RUNX2	0.697566304	0.728831904	0.0312656
cg01745810	9	126497597	2.46E-05	0.023076615	0.243759447	18.55407721	0.301520371	0.488221778	B4	DENND1A	0.877567365	0.894093159	0.016525794
cg17207772	15	86062747	2.47E-05	0.023160791	0.302136866	18.5439972	0.301526822	0.488232225	B4	AKAP13	0.747792972	0.794060463	0.046267492
cg01443339	18	9285911	2.47E-05	0.023171752	-0.356718281	18.53788646	0.301530734	0.488238558	B4	ANKRD12	0.915384103	0.901263553	-0.014120551
cg26552158	6	46096318	2.47E-05	0.023171752	0.350019044	18.53979816	0.30152951	0.488236577	B4	ENPP4	0.294782047	0.363918698	0.069136651
cg00898064	3	38029323	2.49E-05	0.02323257	-0.302634545	18.52736009	0.301537472	0.488249468	B4	NA	0.514033524	0.518355231	0.004321707
cg11176595	4	40232649	2.49E-05	0.02323257	0.316789545	18.52913173	0.301536338	0.488247632	B4	RHOH	0.57070267	0.598694415	0.027991745
cg07505901	2	170627447	2.50E-05	0.023312665	0.530024619	18.51280132	0.301546792	0.488264559	B4	NA	0.930519484	0.929456111	-0.001063373
cg07992500	2	37896583	2.51E-05	0.023312665	0.178425755	18.50497631	0.301551801	0.488272671	B4	CDC42EP3	0.55908704	0.670216967	0.111129928
cg08766812	15	93610780	2.50E-05	0.023312665	0.276196463	18.51670157	0.301544295	0.488260516	B4	RGMA	0.807191028	0.817153912	0.009962884
cg17753843	5	150605144	2.51E-05	0.023312665	0.324366193	18.50699648	0.301550508	0.488270577	B4	CCDC69	0.58813016	0.642568641	0.054438481
cg17867252	6	73364350	2.51E-05	0.023312665	0.254031935	18.50911402	0.301549152	0.488268382	B4	KCNQ5-IT1;KCNQ5	0.826233748	0.857001184	0.030767436
cg20740133	5	106792666	2.51E-05	0.023312665	0.341314555	18.50974127	0.301548751	0.488267731	B4	EFNA5	0.688478074	0.727082817	0.038604743
cg12459798	12	122230734	2.54E-05	0.023497775	0.526861095	18.48613746	0.301563863	0.488292201	B4	RHOF	0.269883456	0.273319191	0.003435734
cg12520664	16	83762345	2.55E-05	0.023508666	0.198874034	18.47824237	0.301568918	0.488300387	B4	CDH13	0.380573428	0.448697505	0.068124078
cg13597815	5	163342977	2.55E-05	0.023508666	-0.339062783	18.47626099	0.301570187	0.488302441	B4	NA	0.061803974	0.063688132	0.001884158
cg14403400	X	44766169	2.55E-05	0.023508666	0.261353834	18.47506706	0.301570952	0.488303679	B4	KDM6A	0.604840295	0.686880889	0.082040594
cg19747953	7	137858693	2.54E-05	0.023508666	-0.676223046	18.48148271	0.301566844	0.488297027	B4	NA	0.946546234	0.932696214	-0.01385002
cg04539559	18	9754156	2.56E-05	0.023520902	0.23461505	18.47147368	0.301573253	0.488307405	B4	RAB31	0.611442933	0.680400113	0.06895718
cg25481186	17	80892080	2.56E-05	0.023552175	-0.554315859	18.46621767	0.301576619	0.488312855	B4	TBCD	0.853779434	0.838354164	-0.01542527
cg19543782	10	35775490	2.58E-05	0.023655472	0.375667069	18.45468461	0.301584004	0.488324814	B4	CCNY	0.674594435	0.729976257	0.055381822
cg06140900	6	33868466	2.58E-05	0.023656965	0.451984969	18.44953483	0.301587302	0.488330154	B4	NA	0.761443933	0.76693434	0.005490408
cg07107661	14	97877297	2.58E-05	0.023656965	0.225760757	18.45047657	0.301586699	0.488329178	B4	NA	0.480095816	0.554417091	0.074321275
cg02861000	1	34736201	2.59E-05	0.023728728	0.30387368	18.44078849	0.301592904	0.488339225	B4	NA	0.648399726	0.673334216	0.02493449
cg22084453	16	1541786	2.60E-05	0.02373829	0.491790429	18.43745622	0.301595039	0.488342681	B4	NA	0.71543167	0.728813395	0.013381724
cg17853302	1	51984744	2.61E-05	0.023791495	-0.515542516	18.42977131	0.301599961	0.488350651	B4	EPS15	0.073889332	0.071494683	-0.002394649
cg18830052	20	3801106	2.61E-05	0.023791495	-0.308237106	18.42655544	0.301602021	0.488353986	B4	C20orf29	0.046831581	0.04171229	-0.005119291
cg22709453	3	122786502	2.61E-05	0.023791495	-0.489613449	18.42535584	0.301602789	0.48835523	B4	PDIA5	0.072134837	0.068694792	-0.003440045
cg10876628	11	72741250	2.62E-05	0.023796371	0.5122282	18.41995721	0.301606247	0.48836083	B4	FCHSD2	0.928759838	0.92929167	0.000531832
cg11303536	14	89001592	2.62E-05	0.023796371	0.37845232	18.4218383	0.301605042	0.488358879	B4	PTPN21	0.283217999	0.32927565	0.046057651
cg04342993	7	37023984	2.63E-05	0.023844241	0.630679622	18.41229652	0.301611155	0.488368776	B4	ELMO1	0.510825601	0.545353116	0.034527515
cg04724720	11	65640939	2.63E-05	0.023844241	-0.380215878	18.41085294	0.301612079	0.488370273	B4	EFEMP2	0.070620416	0.067582726	-0.00303769
cg05836908	15	45474074	2.67E-05	0.024138389	-0.339889966	18.38171539	0.301630747	0.4884005	B4	SHF	0.345097453	0.335799488	-0.009297965
cg09117950	17	16053684	2.67E-05	0.024138389	0.237459724	18.3787656	0.301632637	0.48840356	B4	NCOR1	0.851562308	0.893707931	0.042145623
cg09495478	3	44938102	2.68E-05	0.024138389	0.384761591	18.37135571	0.301637385	0.488411248	B4	TGM4	0.781331096	0.798457166	0.017126069
cg13215646	20	47887476	2.68E-05	0.024138389	-0.224493423	18.37365058	0.301635914	0.488408867	B4	ZNFX1	0.916562062	0.912362357	-0.004199705
cg25010177	10	112622225	2.69E-05	0.024138389	0.40445727	18.36832003	0.30163933	0.488414397	B4	NA	0.301478678	0.352385904	0.050907226
cg25423174	3	12236303	2.68E-05	0.024138389	-0.242310712	18.37195528	0.301637001	0.488410626	B4	NA	0.457015078	0.447655836	-0.009359243
cg25477292	3	194330084	2.68E-05	0.024138389	-0.309678693	18.37055365	0.301637899	0.48841208	B4	TMEM44	0.89792323	0.867807019	-0.030116211
cg22945457	1	225612608	2.71E-05	0.024334893	0.405116349	18.34812294	0.301652273	0.488435354	B4	LBR	0.692024945	0.716654749	0.024629804
cg26978396	14	71921564	2.72E-05	0.024334893	0.427832201	18.34671396	0.301653176	0.488436816	B4	NA	0.943393544	0.944774326	0.001380782
cg14154735	11	1509296	2.73E-05	0.024413742	-0.528573073	18.33760276	0.301659015	0.488446271	B4	MOB2	0.536466333	0.506317558	-0.030148775
cg27621029	3	50379973	2.73E-05	0.024447094	0.608289942	18.33234478	0.301662385	0.488451728	B4	ZMYND10	0.363610214	0.401075431	0.037465217
cg23608915	2	102333795	2.74E-05	0.024488493	0.349336834	18.32641712	0.301666184	0.48845788	B4	MAP4K4	0.310164345	0.332371824	0.022207479
cg23481862	11	89655871	2.75E-05	0.024518879	-0.284920004	18.32142293	0.301669385	0.488463063	B4	LOC729384	0.920793894	0.909556048	-0.011237845
cg00752969	2	70311984	2.79E-05	0.024597067	0.220193474	18.29303159	0.301687585	0.488492532	B4	NA	0.850721062	0.860734048	0.010012986
cg01721555	3	122401300	2.78E-05	0.024597067	-0.53655229	18.29574794	0.301685844	0.488489712	B4	PARP14	0.952622123	0.938018989	-0.014603134
cg04837616	17	75880542	2.78E-05	0.024597067	0.643393845	18.29476794	0.301686472	0.488490729	B4	FLJ45079	0.453754849	0.496027645	0.042272796
cg06086141	1	226113058	2.78E-05	0.024597067	0.350674492	18.29589627	0.301685748	0.488489558	B4	PYCR2	0.924809699	0.936371392	0.011561694
cg12944251	9	137302146	2.78E-05	0.024597067	-0.324594522	18.30128698	0.301682293	0.488483963	B4	RXRA	0.263656253	0.262974056	-0.000682197
cg13902579	3	154830965	2.77E-05	0.024597067	0.406235938	18.30395905	0.30168058	0.488481189	B4	MME	0.354675136	0.373782699	0.019107563
cg19613776	15	42579085	2.77E-05	0.024597067	-0.257342244	18.30651465	0.301678942	0.488478536	B4	GANC	0.624708394	0.622289149	-0.002419245
cg22249252	16	11726595	2.78E-05	0.024597067	0.273675966	18.29964672	0.301683344	0.488485665	B4	NA	0.913526858	0.923992942	0.010466084
cg24145401	1	159047177	2.77E-05	0.024597067	-0.189413273	18.30750343	0.301678308	0.48847751	B4	AIM2	0.527235784	0.505005425	-0.022230359
cg01838759	3	52491910	2.80E-05	0.024667508	0.389514929	18.28232429	0.30169445	0.488503647	B4	NISCH	0.443861441	0.504802716	0.060941275
cg11956483	12	96723406	2.80E-05	0.024667508	0.307561195	18.28351147	0.301693688	0.488502415	B4	CDK17	0.53142482	0.596532782	0.065107963
cg22400420	1	183851242	2.81E-05	0.024708053	-0.415758392	18.27653784	0.30169816	0.488509654	B4	RGL1	0.381774813	0.413392039	0.031617226
cg04250055	11	60790391	2.82E-05	0.02474085	-0.676153083	18.2682799	0.301703454	0.488518227	B4	NA	0.307857967	0.305700722	-0.002157245
cg08635575	9	80189185	2.83E-05	0.02474085	0.241266721	18.26335604	0.301706611	0.48852334	B4	GNA14	0.837270403	0.870782406	0.033512003
cg08799032	2	46229638	2.83E-05	0.02474085	0.275921783	18.26182038	0.301707596	0.488524934	B4	PRKCE	0.536452366	0.609491437	0.073039071
cg14914220	19	30897573	2.83E-05	0.02474085	0.415375269	18.26286096	0.301706929	0.488523854	B4	ZNF536	0.09719047	0.122078665	0.024888194
cg16531222	12	11816105	2.82E-05	0.02474085	0.273831678	18.26562416	0.301705157	0.488520985	B4	ETV6	0.865915373	0.884922318	0.019006945
cg03541887	1	248903323	2.85E-05	0.02482707	0.224603102	18.24998876	0.301715183	0.488537219	B4	LOC646627	0.557098433	0.595466661	0.038368227
cg17335281	5	126087919	2.85E-05	0.02482707	0.325207494	18.24988579	0.301715249	0.488537326	B4	NA	0.583591448	0.654659988	0.07106854
cg16569373	16	3904593	2.87E-05	0.024979769	0.875611528	18.23250427	0.301726396	0.488555375	B4	CREBBP	0.557815181	0.579194037	0.021378855
cg18671668	1	179872974	2.87E-05	0.024979769	0.298004658	18.23380234	0.301725563	0.488554027	B4	TOR1AIP1	0.827123232	0.855236212	0.028112981
cg04095165	17	10189823	2.88E-05	0.024989522	-0.310240068	18.224577	0.30173148	0.488563607	B4	NA	0.078376321	0.07620759	-0.002168731
cg09385060	4	129835126	2.88E-05	0.024989522	0.342758462	18.22460958	0.301731459	0.488563573	B4	SCLT1	0.879008477	0.89601559	0.017007112
cg23423412	5	95384446	2.88E-05	0.024989522	0.268950283	18.22797369	0.301729302	0.488560079	B4	LOC101929710	0.871762067	0.898843361	0.027081294
cg25007283	3	147112143	2.89E-05	0.025007336	-0.292667159	18.22074164	0.30173394	0.48856759	B4	ZIC4	0.377708954	0.354460944	-0.02324801
cg19039578	16	11483144	2.90E-05	0.025052498	-0.258003244	18.21229932	0.301739355	0.488576358	B4	NA	0.558899425	0.553620878	-0.005278547
cg25953417	6	30690712	2.90E-05	0.025052498	0.40343605	18.21466239	0.301737839	0.488573904	B4	TUBB	0.447313693	0.462887526	0.015573833
cg22529432	17	68349095	2.90E-05	0.025062956	0.438492503	18.20907983	0.30174142	0.488579701	B4	NA	0.926816018	0.931471972	0.004655954
cg16785077_TC21	21	41419940	2.91E-05	0.025113914	-0.227833446	18.20254308	0.301745613	0.488586491	C0	MX1	0.826676786	0.770742015	-0.055934771
cg17984982	13	43543192	2.92E-05	0.02514988	0.342222859	18.19724372	0.301749012	0.488591995	B4	EPSTI1	0.918055792	0.924282681	0.006226889
cg00688297	8	145752292	2.93E-05	0.02521638	-0.09073248	18.18945891	0.301754006	0.488600081	B4	MGC70857;LRRC24	0.176278564	0.112181671	-0.064096893
cg04058821	5	95678409	2.94E-05	0.025229446	-0.285589713	18.18366379	0.301757724	0.488606101	B4	LOC101929710	0.88117518	0.883995063	0.002819883
cg04915891	2	46621477	2.96E-05	0.025229446	0.401803047	18.16958137	0.301766759	0.48862073	B4	NA	0.940288524	0.941848151	0.001559627
cg08110950	13	49109917	2.95E-05	0.025229446	0.321943317	18.17732399	0.301761791	0.488612687	B4	NA	0.741198596	0.782374279	0.041175683
cg08125310	13	77989720	2.95E-05	0.025229446	0.475115839	18.17584206	0.301762742	0.488614226	B4	NA	0.706903565	0.712130752	0.005227187
cg12378285	2	136808729	2.94E-05	0.025229446	0.258578075	18.18577733	0.301756368	0.488603905	B4	NA	0.572562155	0.645436868	0.072874713
cg13780089	4	14164719	2.96E-05	0.025229446	0.28402207	18.16734371	0.301768194	0.488623055	B4	NA	0.873342226	0.887671305	0.014329079
cg15537651	3	141056124	2.94E-05	0.025229446	0.319288935	18.17952175	0.301760381	0.488610404	B4	ZBTB38	0.905649812	0.91030628	0.004656468
cg16824319	1	248903933	2.96E-05	0.025229446	0.268922988	18.16789633	0.30176784	0.488622481	B4	LOC646627	0.694811254	0.719463319	0.024652065
cg22001533	2	50574516	2.96E-05	0.025229446	0.502940162	18.1679062	0.301767834	0.48862247	B4	NRXN1	0.120541803	0.133197643	0.01265584
cg05296770	16	4357318	2.97E-05	0.025260034	0.402865564	18.16252614	0.301771285	0.48862806	B4	NA	0.24115682	0.278712434	0.037555614
cg02049955	11	118045910	2.98E-05	0.025326166	0.657847939	18.15482588	0.301776226	0.48863606	B4	SCN2B	0.357395908	0.399919809	0.042523901
cg00989036	1	47060074	3.00E-05	0.02543177	0.453976763	18.1428078	0.301783938	0.488648547	B4	MKNK1	0.935545441	0.940730151	0.005184711
cg17343483	2	97527523	3.00E-05	0.02543177	0.227451823	18.14163099	0.301784693	0.488649769	B4	SEMA4C	0.963684182	0.965971641	0.002287459
cg12670310	22	20071307	3.01E-05	0.025436158	0.287774798	18.1343404	0.301789372	0.488657345	B4	DGCR8	0.803995656	0.833662828	0.029667173
cg22016995	11	614787	3.01E-05	0.025436158	-0.156189939	18.13443392	0.301789312	0.488657248	B4	IRF7	0.981335791	0.968691366	-0.012644425
cg23540819	8	17940228	3.01E-05	0.025436158	0.390124839	18.13595754	0.301788334	0.488655665	B4	ASAH1	0.599650201	0.649400182	0.049749981
cg05746499	2	179969765	3.06E-05	0.025759386	0.22269112	18.1014645	0.301810472	0.48869151	B4	SESTD1	0.8328974	0.878530262	0.045632862
cg19060760	12	1887038	3.06E-05	0.025759386	0.16369381	18.10279612	0.301809617	0.488690126	B4	ADIPOR2	0.667040674	0.763198108	0.096157433
cg21881287	5	131766579	3.05E-05	0.025759386	0.273991835	18.10419387	0.30180872	0.488688673	B4	C5orf56	0.802376211	0.81745651	0.0150803
cg02135861	5	2752139	3.06E-05	0.025766368	0.196240627	18.09860887	0.301812305	0.488694478	B4	C5orf38;IRX2	0.17321218	0.24311504	0.069902859
cg00781277	2	71830428	3.08E-05	0.025791913	-0.664222368	18.08877105	0.30181862	0.488704703	B4	DYSF	0.385179804	0.384572942	-0.000606862
cg05824709	1	156119420	3.08E-05	0.025791913	0.246454094	18.08791781	0.301819167	0.48870559	B4	SEMA4A	0.69389007	0.749773496	0.055883426
cg10363678	4	185383655	3.07E-05	0.025791913	0.432092298	18.09293947	0.301815944	0.48870037	B4	IRF2	0.880412395	0.883496715	0.00308432
cg21520055	14	21504190	3.08E-05	0.025791913	0.2934704	18.08740402	0.301819497	0.488706124	B4	RNASE13	0.777046804	0.820209701	0.043162897
cg04345008	5	138604103	3.09E-05	0.025826375	-0.515234756	18.08010981	0.30182418	0.488713706	B4	NA	0.268834138	0.267547401	-0.001286737
cg04993355	15	84642940	3.09E-05	0.025826375	0.167919877	18.07787907	0.301825612	0.488716025	B4	ADAMTSL3	0.815504197	0.855930112	0.040425915
cg07846307	17	3861532	3.09E-05	0.025826375	0.480057027	18.07781046	0.301825656	0.488716096	B4	ATP2A3	0.474578603	0.531043658	0.056465055
cg08286170	X	40437464	3.11E-05	0.025896704	0.203019276	18.06804839	0.301831923	0.488726244	B4	NA	0.593167847	0.670474868	0.077307022
cg23590549	X	9285546	3.11E-05	0.025896704	0.550057434	18.06766758	0.301832167	0.48872664	B4	NA	0.538280355	0.550385398	0.012105043
cg14778405	10	6319483	3.13E-05	0.02599854	-0.498718443	18.05505823	0.301840263	0.488739748	B4	NA	0.364048791	0.373626222	0.009577431
cg15843572	12	133249005	3.13E-05	0.02599854	0.464728092	18.05577738	0.301839801	0.488739	B4	POLE	0.548478046	0.579253702	0.030775656
cg08774868	7	80399952	3.14E-05	0.026104987	0.276325995	18.04439314	0.301847111	0.488750836	B4	SEMA3C	0.866516724	0.890687859	0.024171136
cg19531495	6	14873242	3.17E-05	0.026261051	0.241368293	18.02987894	0.301856431	0.488765927	B4	NA	0.786174891	0.825496678	0.039321786
cg26072939	14	96707179	3.19E-05	0.026445603	-0.457162397	18.01322658	0.301867125	0.488783243	B4	BDKRB2	0.968819521	0.96358371	-0.005235811
cg17087356	3	59749626	3.20E-05	0.026448514	0.297121195	18.01074113	0.301868721	0.488785828	B4	FHIT	0.916962302	0.928721324	0.011759022
cg19946512	9	36342357	3.20E-05	0.0264635	-0.266718346	18.00732053	0.301870918	0.488789385	B4	RNF38	0.099702376	0.10191132	0.002208944
cg26672452	16	88794582	3.22E-05	0.026607025	-0.487381889	17.99395325	0.301879504	0.488803287	B4	FAM38A	0.854404334	0.835970883	-0.018433451
cg02112168	14	45579561	3.24E-05	0.026708323	0.316649985	17.98389486	0.301885965	0.488813748	B4	PRPF39;SNORD127	0.370642232	0.433542875	0.062900643
cg19986254	11	2077522	3.25E-05	0.026741616	0.195671164	17.97908672	0.301889053	0.488818749	B4	NA	0.842771084	0.843140963	0.000369879
cg00813378	1	1475209	3.26E-05	0.026784926	0.133222048	17.97127213	0.301894073	0.488826878	B4	C1orf70	0.180040478	0.2256516	0.045611122
cg18307303	5	158757456	3.26E-05	0.026784926	0.402590263	17.97317916	0.301892848	0.488824894	B4	IL12B	0.644239431	0.674149315	0.029909884
cg19504061	3	137755698	3.27E-05	0.026815009	0.202293045	17.96672493	0.301896994	0.488831608	B4	NA	0.322786914	0.405493164	0.082706251
cg04365699	3	177320997	3.27E-05	0.026822388	0.328840307	17.96392087	0.301898796	0.488834525	B4	NA	0.906471864	0.922563915	0.016092051
cg00421164	6	7111068	3.27E-05	0.02682693	0.330043624	17.96133667	0.301900456	0.488837213	B4	RREB1	0.566184281	0.635390731	0.06920645
cg25304129	22	26125490	3.28E-05	0.02683205	0.133647578	17.95871073	0.301902143	0.488839944	B4	NA	0.575442499	0.636495817	0.061053318
cg00355089	17	27053983	3.30E-05	0.026960638	-0.554347229	17.94665957	0.301909886	0.488852481	B4	TLCD1	0.08241458	0.080263005	-0.002151575
cg18836258	X	71793459	3.30E-05	0.026982198	0.237462256	17.94278886	0.301912373	0.488856508	B4	HDAC8	0.712702953	0.766999993	0.05429704
cg07174400	2	234259009	3.31E-05	0.027010072	0.564051298	17.93844193	0.301915166	0.488861031	B4	NA	0.41850956	0.465095297	0.046585736
cg14111685	2	242930205	3.35E-05	0.027290053	0.14483105	17.91316715	0.301931407	0.488887329	B4	NA	0.597252388	0.647423175	0.050170786
cg17518427	12	65076857	3.35E-05	0.027290053	0.575728663	17.91281901	0.301931631	0.488887691	B4	RASSF3	0.917104043	0.915070839	-0.002033204
cg07060111	10	79073497	3.36E-05	0.027303941	0.450147222	17.90780369	0.301934854	0.48889291	B4	KCNMA1	0.693695402	0.719508555	0.025813152
cg16729467	3	14865571	3.36E-05	0.027303941	-0.694335614	17.90733927	0.301935153	0.488893393	B4	FGD5	0.331681537	0.360460204	0.028778667
cg09020199	6	30297320	3.38E-05	0.027385505	-0.822950121	17.89900081	0.301940512	0.488902071	B4	TRIM39	0.366097478	0.386074955	0.019977477
cg01943694	6	20498055	3.40E-05	0.027547443	0.420580177	17.8823501	0.301951214	0.488919399	B4	NA	0.888009523	0.892097692	0.004088169
cg06273051	16	83803650	3.40E-05	0.027547443	0.117624351	17.88240898	0.301951176	0.488919338	B4	CDH13	0.593049139	0.692165486	0.099116347
cg20352371	12	41831595	3.41E-05	0.027547443	-0.112634634	17.8802692	0.301952551	0.488921565	B4	PDZRN4	0.779720035	0.72197811	-0.057741925
cg10123669	2	168970900	3.41E-05	0.027555171	0.226064616	17.87528778	0.301955753	0.48892675	B4	STK39	0.66056468	0.757850648	0.097285968
cg23858467	6	135635876	3.41E-05	0.027555171	0.394191493	17.87557118	0.301955571	0.488926455	B4	AHI1	0.929148408	0.935755928	0.00660752
cg15458222	3	121380533	3.43E-05	0.02761878	0.23621698	17.86835516	0.30196021	0.488933966	B4	HCLS1	0.880007195	0.912892594	0.0328854
cg20519597	11	33156606	3.45E-05	0.027773396	0.288380948	17.85469879	0.301968989	0.488948181	B4	CSTF3	0.90756808	0.925749014	0.018180934
cg05665383	7	158329266	3.46E-05	0.027788143	-0.394829957	17.84891885	0.301972705	0.488954197	B4	PTPRN2	0.94053173	0.92844167	-0.01209006
cg08001109	17	61618011	3.46E-05	0.027788143	0.471350028	17.84837997	0.301973051	0.488954758	B4	KCNH6	0.954825999	0.955176923	0.000350924
cg19931663	15	33087357	3.46E-05	0.027788143	-0.725360849	17.84703381	0.301973916	0.48895616	B4	FMN1	0.952091613	0.943424584	-0.008667029
cg21891597	8	132936123	3.47E-05	0.027814631	0.201239941	17.8428912	0.30197658	0.488960472	B4	EFR3A	0.755190191	0.800882035	0.045691844
cg07328987	13	47188916	3.48E-05	0.027839033	0.315270383	17.83672442	0.301980545	0.488966892	B4	LRCH1	0.853938525	0.882184488	0.028245963
cg19225798	9	123165816	3.48E-05	0.027839033	-0.460672598	17.83871218	0.301979267	0.488964823	B4	CDK5RAP2	0.249749663	0.258303778	0.008554115
cg05932702	12	72148251	3.48E-05	0.027847034	-0.240424443	17.83395469	0.301982326	0.488969776	B4	RAB21	0.253919131	0.237075987	-0.016843145
cg10281604	22	40732359	3.49E-05	0.027902719	0.498604857	17.82767723	0.301986362	0.488976311	B4	NA	0.497122718	0.522669996	0.025547279
cg21416544	12	8986988	3.51E-05	0.027977666	0.253340708	17.81999709	0.3019913	0.488984308	B4	A2ML1	0.635643124	0.699777096	0.064133972
cg03892034	12	46763876	3.51E-05	0.027990096	0.300319695	17.81683552	0.301993333	0.4889876	B4	SLC38A2	0.841529454	0.867890089	0.026360635
cg21142743	1	228272495	3.52E-05	0.027990096	0.338532447	17.8147423	0.301994679	0.488989779	B4	ARF1	0.106167491	0.120622033	0.014454542
cg19214239	1	22834996	3.53E-05	0.028026542	0.225399967	17.8099039	0.301997791	0.488994817	B4	ZBTB40	0.826809579	0.8789711	0.052161521
cg16054184	10	78944582	3.53E-05	0.028027371	0.220317701	17.80551403	0.302000614	0.488999388	B4	KCNMA1	0.905571197	0.928737998	0.023166802
cg26955383	10	105218660	3.53E-05	0.028027371	0.319145494	17.8071148	0.301999584	0.488997721	B4	CALHM1	0.276492167	0.303142329	0.026650162
cg16264777	16	85870789	3.54E-05	0.028047733	0.526890222	17.80186271	0.302002962	0.48900319	B4	NA	0.586597076	0.613566288	0.026969212
cg11964810	1	1478170	3.55E-05	0.028078449	-0.159397147	17.79729178	0.302005901	0.48900795	B4	SSU72	0.82576484	0.799130638	-0.026634202
cg17053854	17	75463180	3.55E-05	0.028078449	0.22760883	17.7953015	0.302007181	0.489010022	B4	9-Sep	0.904399143	0.909728265	0.005329122
cg06393376	22	38137995	3.57E-05	0.028098421	0.277748534	17.78396953	0.30201447	0.489021824	B4	TRIOBP	0.864440698	0.89626259	0.031821892
cg06445633	12	54148283	3.57E-05	0.028098421	-0.196483479	17.78674611	0.302012684	0.489018932	B4	CISTR	0.915529479	0.904070286	-0.011459193
cg16452467	1	46509145	3.57E-05	0.028098421	0.377786397	17.78309462	0.302015032	0.489022735	B4	PIK3R3	0.884429822	0.888879626	0.004449803
cg22451300	1	61692418	3.57E-05	0.028098421	-0.26911271	17.78495311	0.302013837	0.489020799	B4	NFIA	0.347302889	0.375630795	0.028327907
cg24872431	16	85016361	3.56E-05	0.028098421	0.214942334	17.78809832	0.302011814	0.489017524	B4	ZDHHC7	0.777908411	0.816472969	0.038564558
cg07391265	20	47369564	3.58E-05	0.028099984	0.461084283	17.78083777	0.302016484	0.489025085	B4	PREX1	0.314023609	0.375094061	0.061070453
cg01553433	19	17515486	3.60E-05	0.028140582	-0.260223101	17.76517837	0.302026556	0.489041394	B4	BISPR;MVB12A;BST2	0.212257408	0.19396981	-0.018287597
cg14838757	1	180662660	3.59E-05	0.028140582	0.340093466	17.77220917	0.302022034	0.489034072	B4	XPR1	0.702345876	0.741776709	0.039430833
cg16890093	6	32813084	3.59E-05	0.028140582	-0.341696319	17.77467476	0.302020448	0.489031504	B4	TAP1;PSMB8	0.067574421	0.059430333	-0.008144088
cg21506258	12	40569152	3.60E-05	0.028140582	0.243296458	17.76911756	0.302024023	0.489037292	B4	NA	0.863020785	0.880097713	0.017076928
cg22106847	5	118584299	3.60E-05	0.028140582	0.55574971	17.76506692	0.302026628	0.48904151	B4	DMXL1	0.934420421	0.929084842	-0.00533558
cg23282441	10	73533927	3.59E-05	0.028140582	0.201982662	17.77007283	0.302023408	0.489036297	B4	C10orf54;CDH23	0.323082185	0.377693386	0.054611201
cg03290827	17	75180760	3.63E-05	0.028358935	0.214225213	17.74708445	0.302038196	0.489060241	B4	SEC14L1	0.698430621	0.781711673	0.083281052
cg06633081	14	55120781	3.65E-05	0.028359607	-0.368401526	17.73935084	0.302043171	0.489068297	B4	SAMD4A	0.577094267	0.549790043	-0.027304224
cg08704974	4	169231356	3.65E-05	0.028359607	0.423503323	17.74140093	0.302041852	0.489066162	B4	DDX60	0.942851982	0.945179006	0.002327024
cg17014327	4	2488581	3.65E-05	0.028359607	0.253698346	17.74101759	0.302042099	0.489066561	B4	RNF4	0.691499361	0.753636628	0.062137267
cg23831685	1	174844547	3.65E-05	0.028359607	-0.266637308	17.73855115	0.302043686	0.48906913	B4	RABGAP1L	0.917625692	0.895796211	-0.021829481
cg23836747	4	186559629	3.66E-05	0.028428325	0.293088832	17.73147168	0.302048241	0.489076505	B4	SORBS2	0.445801432	0.471437876	0.025636444
cg00826902	1	3563954	3.67E-05	0.028457458	0.201893686	17.72514655	0.30205231	0.489083095	B4	WDR8	0.856520489	0.895169213	0.038648725
cg17766035	2	40506325	3.67E-05	0.028457458	-0.231928177	17.72535892	0.302052174	0.489082874	B4	SLC8A1	0.844615891	0.807580353	-0.037035538
cg20303259	21	46341918	3.68E-05	0.028461722	0.390074509	17.72273038	0.302053865	0.489085612	B4	ITGB2;ITGB2-AS1	0.86109985	0.8569183	-0.00418155
cg02155111	3	112695305	3.70E-05	0.02857002	0.288287223	17.71283507	0.302060232	0.489095922	B4	CD200R1	0.869440553	0.894872137	0.025431584
cg03587597	8	144105055	3.72E-05	0.028724199	-0.26917725	17.69759193	0.302070041	0.489111805	B4	NA	0.952039703	0.939059558	-0.012980145
cg25055946	12	58328060	3.72E-05	0.028724199	0.240145989	17.6990899	0.302069077	0.489110244	B4	NA	0.80569853	0.844702703	0.039004173
cg21969795	17	7759140	3.74E-05	0.028786001	-0.299574168	17.69108507	0.302074228	0.489118585	B4	TMEM88	0.683650922	0.663348567	-0.020302356
cg05472536	17	73687477	3.77E-05	0.028869766	-0.360209047	17.67333079	0.302085655	0.489137087	B4	SAP30BP	0.305654751	0.288625748	-0.017029002
cg11399136	16	17510922	3.76E-05	0.028869766	0.386158639	17.68021744	0.302081223	0.48912991	B4	XYLT1	0.482976784	0.504400188	0.021423404
cg11948159	11	57103751	3.77E-05	0.028869766	0.324931921	17.67391988	0.302085276	0.489136473	B4	SSRP1	0.079943418	0.090229573	0.010286156
cg13156132	2	235399596	3.76E-05	0.028869766	0.228103671	17.67697449	0.30208331	0.489133289	B4	NA	0.361076011	0.399129772	0.038053761
cg14186779	9	139243399	3.77E-05	0.028869766	-0.402883713	17.67257429	0.302086142	0.489137875	B4	GPSM1	0.856280561	0.826479933	-0.029800628
cg17515347	1	159047163	3.76E-05	0.028869766	-0.182884889	17.67933268	0.302081792	0.489130832	B4	AIM2	0.613543976	0.602168134	-0.011375843
cg20006294	3	69342285	3.77E-05	0.028878009	0.374836631	17.66990446	0.30208786	0.489140658	B4	FRMD4B	0.547406986	0.603298664	0.055891678
cg15444997	18	6211045	3.79E-05	0.028949688	-0.248412495	17.66273963	0.302092472	0.489148125	B4	L3MBTL4	0.686374435	0.694116926	0.007742491
cg24620622	15	31690382	3.80E-05	0.02901463	0.182127301	17.65606584	0.302096768	0.489155081	B4	KLF13	0.885593034	0.910236263	0.024643229
cg01824652	8	75653980	3.81E-05	0.029043101	-0.777976537	17.65197726	0.3020994	0.489159342	B4	NA	0.938001481	0.91997223	-0.018029251
cg03208983	12	10767011	3.83E-05	0.029102398	0.64049876	17.63940979	0.30210749	0.489172442	B4	MAGOHB	0.939975027	0.932871162	-0.007103865
cg04508912	7	16844714	3.84E-05	0.029102398	0.270592638	17.63699009	0.302109048	0.489174964	B4	AGR2	0.742796928	0.777808369	0.035011441
cg06656240	17	76412890	3.85E-05	0.029102398	-0.386841423	17.62847772	0.302114528	0.489183838	B4	PGS1	0.740078742	0.732839751	-0.007238991
cg10787639	6	107673937	3.86E-05	0.029102398	0.540918941	17.62302609	0.302118038	0.489189521	B4	PDSS2	0.397153506	0.446920006	0.0497665
cg13523561	12	12970188	3.86E-05	0.029102398	-0.105692246	17.62424614	0.302117252	0.489188249	B4	DDX47	0.959557998	0.93721085	-0.022347148
cg16615151	3	111409324	3.85E-05	0.029102398	0.268130952	17.62943963	0.302113909	0.489182835	B4	PLCXD2	0.601538982	0.635069951	0.03353097
cg22024140	19	46527471	3.83E-05	0.029102398	0.300876946	17.63826745	0.302108225	0.489173633	B4	PGLYRP1	0.702443494	0.767811233	0.065367739
cg22653982	14	80698222	3.83E-05	0.029102398	-0.496957495	17.63927748	0.302107575	0.48917258	B4	DIO2-AS1;DIO2	0.916043656	0.895194627	-0.020849029
cg24632582	15	41233701	3.86E-05	0.029102398	-0.567872918	17.62343667	0.302117773	0.489189093	B4	NA	0.497685591	0.490693324	-0.006992267
cg26595939	4	91047985	3.82E-05	0.029102398	0.296747754	17.64520772	0.302103757	0.489166398	B4	CCSER1	0.093911825	0.116991007	0.023079182
cg26984593	10	14051636	3.85E-05	0.029102398	0.192430759	17.62989855	0.302113613	0.489182357	B4	FRMD4A	0.487419178	0.510732362	0.023313184
cg27325404	10	75578748	3.86E-05	0.029102398	0.648426744	17.62581663	0.302116241	0.489186612	B4	CAMK2G	0.369905069	0.41073075	0.040825682
cg11800019	6	154555741	3.90E-05	0.029328225	0.255138806	17.60513414	0.302129558	0.489208174	B4	OPRM1;IPCEF1	0.849620576	0.876977333	0.027356757
cg09251764	17	6659070	3.92E-05	0.029469125	-0.373113029	17.59004321	0.302139276	0.489223909	B4	XAF1	0.247641197	0.239968531	-0.007672666
cg10105512	22	31643111	3.93E-05	0.029469125	0.236031769	17.58917451	0.302139835	0.489224815	B4	LIMK2	0.913827737	0.919221405	0.005393667
cg19830657	5	180597246	3.92E-05	0.029469125	-0.316390979	17.58977755	0.302139447	0.489224186	B4	NA	0.195966841	0.185874399	-0.010092441
cg03135975	14	71159191	3.93E-05	0.029474396	0.21192876	17.58676614	0.302141386	0.489227326	B4	NA	0.880494998	0.896177286	0.015682288
cg00623437	10	94025806	3.94E-05	0.029517267	0.387976698	17.57971038	0.30214593	0.489234684	B4	CPEB3	0.901425382	0.903965148	0.002539766
cg20862047	10	126150218	3.94E-05	0.029517267	-0.325805736	17.58046459	0.302145444	0.489233897	B4	LHPP	0.06598162	0.060421138	-0.005560482
cg10862235	2	32489693	3.95E-05	0.029537543	0.647670338	17.57626774	0.302148147	0.489238274	B4	NLRC4	0.355818243	0.384732379	0.028914136
cg11803424	17	6663743	3.96E-05	0.02956159	0.353821855	17.57256681	0.302150531	0.489242133	B4	XAF1	0.944542783	0.947400972	0.002858188
cg27019594	3	127892866	4.00E-05	0.029872877	0.481012575	17.54907519	0.302165661	0.489266633	B4	EEFSEC	0.572302545	0.597430623	0.025128078
cg13429095	1	206913187	4.01E-05	0.029879612	0.438720955	17.54336806	0.302169338	0.489272586	B4	NA	0.650286259	0.64359592	-0.006690339
cg20217367	3	189086311	4.01E-05	0.029879612	-0.386863171	17.54626046	0.302167474	0.489269569	B4	NA	0.450223599	0.435840364	-0.014383235
cg21802801	13	88652224	4.02E-05	0.029879612	-0.42718994	17.5425318	0.302169876	0.489273458	B4	NA	0.864782348	0.841729336	-0.023053012
cg02198853	8	38688866	4.03E-05	0.029887162	0.37468768	17.53796998	0.302172815	0.489278216	B4	TACC1	0.894347331	0.909243639	0.014896308
cg24227770	1	228336392	4.02E-05	0.029887162	-0.504249931	17.53847026	0.302172493	0.489277694	B4	GJC2;GUK1	0.77639836	0.753443662	-0.022954698
cg08824724	19	51972371	4.03E-05	0.029909301	0.241729232	17.53344634	0.302175729	0.489282935	B4	NA	0.738731584	0.780081805	0.04135022
cg12969026	4	10537896	4.04E-05	0.029909301	0.294211237	17.53241709	0.302176392	0.489284008	B4	CLNK	0.792751729	0.818676056	0.025924326
cg22523078	15	74417907	4.05E-05	0.029959271	0.360457943	17.52698284	0.302179893	0.489289677	B4	NA	0.883187926	0.905207004	0.022019078
cg08741063	2	171949370	4.07E-05	0.030087296	0.303224677	17.51623616	0.302186817	0.489300888	B4	TLK1	0.78554313	0.828200778	0.042657648
cg25485176	3	62799608	4.10E-05	0.030256841	-0.718747302	17.50271709	0.302195527	0.489314991	B4	CADPS	0.933698564	0.915860278	-0.017838287
cg03102881	16	81130802	4.12E-05	0.030386784	0.216975198	17.48792131	0.302205061	0.489330429	B4	GCSH	0.887659994	0.918783415	0.031123421
cg16147878	2	207474733	4.12E-05	0.030386784	0.237878277	17.48797263	0.302205028	0.489330375	B4	ADAM23	0.838356965	0.868938954	0.030581988
cg24596008	2	242741273	4.12E-05	0.030386784	0.204984114	17.49191483	0.302202487	0.489326262	B4	GAL3ST2	0.981666404	0.98561627	0.003949866
cg19642177	6	74270821	4.14E-05	0.03040531	0.270176407	17.48267001	0.302208445	0.489335908	B4	NA	0.920839482	0.931133869	0.010294387
cg21209552	12	51512417	4.13E-05	0.03040531	0.484332363	17.48340719	0.30220797	0.489335139	B4	TFCP2	0.422719792	0.489111054	0.066391262
cg13026137	6	31701260	4.18E-05	0.030658533	0.523238349	17.46169361	0.302221963	0.489357797	B4	CLIC1	0.396023096	0.433868003	0.037844906
cg18569695	8	143433909	4.17E-05	0.030658533	-0.517957942	17.46330159	0.302220927	0.489356119	B4	TSNARE1	0.891909765	0.875772357	-0.016137408
cg07652854	7	80551731	4.19E-05	0.03072443	0.270974772	17.45530343	0.302226082	0.489364466	B4	NA	0.853280852	0.87492303	0.021642178
cg16230983	14	52336657	4.20E-05	0.030737592	0.338483214	17.45243418	0.302227931	0.48936746	B4	GNG2	0.702022287	0.733673041	0.031650754
cg13369266	7	35821562	4.21E-05	0.030745762	0.23550864	17.44592455	0.302232127	0.489374254	B4	SEPT7-AS1	0.844283673	0.877851482	0.033567809
cg17015517	10	73069704	4.21E-05	0.030745762	0.430859086	17.44653443	0.302231734	0.489373618	B4	NA	0.699312153	0.723878954	0.024566802
cg24816286	8	54753935	4.21E-05	0.030745762	0.253058703	17.4466491	0.30223166	0.489373498	B4	ATP6V1H	0.7931524	0.824155146	0.031002746
cg06218095	2	16126293	4.24E-05	0.030906315	-0.263529452	17.43298725	0.302240466	0.489387757	B4	NA	0.880695725	0.844421237	-0.036274488
cg17796923	14	34305432	4.24E-05	0.030906315	0.415959242	17.43129581	0.302241556	0.489389523	B4	NA	0.927648725	0.929648734	0.002000009
cg04497015	16	85780385	4.25E-05	0.030964614	-0.173989961	17.4254578	0.30224532	0.489395616	B4	C16orf74	0.829434046	0.80390576	-0.025528286
cg03743624	3	16549040	4.26E-05	0.030991645	0.357638585	17.42169322	0.302247747	0.489399546	B4	RFTN1	0.713319408	0.750956603	0.037637195
cg17460285	17	40985453	4.27E-05	0.031010283	0.219660805	17.41848606	0.302249814	0.489402894	B4	PSME3	0.272983343	0.321853178	0.048869835
cg08621778	1	202102420	4.29E-05	0.031157931	0.263789186	17.40678989	0.302257355	0.489415103	B4	ARL8A	0.600768043	0.641927825	0.041159782
cg01387455	6	11515198	4.31E-05	0.031213166	0.161167867	17.39774166	0.302263189	0.489424549	B4	NA	0.76052953	0.801632303	0.041102773
cg05300029	14	21148957	4.34E-05	0.031213166	0.130196423	17.38157219	0.302273615	0.489441431	B4	NA	0.842097312	0.886715396	0.044618083
cg08086385	3	72430211	4.33E-05	0.031213166	0.2954861	17.39020377	0.302268049	0.489432419	B4	RYBP	0.805112813	0.844838647	0.039725834
cg11614245	4	146539248	4.34E-05	0.031213166	0.358052831	17.3822189	0.302273198	0.489440756	B4	MMAA	0.450272177	0.486719843	0.036447666
cg19278246	16	29911140	4.33E-05	0.031213166	-0.39419445	17.38648067	0.30227045	0.489436306	B4	ASPHD1;SEZ6L2	0.069842144	0.067200531	-0.002641613
cg21504624	9	34653580	4.33E-05	0.031213166	-0.822286615	17.38695686	0.302270143	0.489435809	B4	IL11RA	0.285258091	0.280973537	-0.004284554
cg21645341	13	49230980	4.33E-05	0.031213166	0.483615111	17.38973068	0.302268354	0.489432913	B4	CYSLTR2	0.307597013	0.367057516	0.059460503
cg23027487	19	47827348	4.34E-05	0.031213166	0.228153053	17.38287307	0.302272776	0.489440073	B4	NA	0.922674402	0.934452992	0.011778591
cg23243492	3	194214992	4.32E-05	0.031213166	0.563507797	17.39103366	0.302267514	0.489431553	B4	NA	0.933553203	0.931225768	-0.002327435
cg25888759_BC21	21	41450167	4.31E-05	0.031213166	0.44619038	17.3988188	0.302262494	0.489423425	C0	MX1	0.94721836	0.949705955	0.002487595
cg26681488	2	173118137	4.34E-05	0.031213166	-0.345940354	17.38562961	0.302270998	0.489437195	B4	NA	0.14577624	0.136345754	-0.009430486
cg17865549	8	23541133	4.36E-05	0.031309477	-0.372735309	17.37331667	0.302278938	0.489450051	B4	NKX3-1	0.199826552	0.195658412	-0.00416814
cg01816726	10	17496989	4.37E-05	0.031309936	-0.442509942	17.37133702	0.302280215	0.489452118	B4	ST8SIA6	0.173111539	0.182804616	0.009693077
cg18097518	2	36932700	4.38E-05	0.031379557	0.228126752	17.36484475	0.302284402	0.489458898	B4	VIT	0.894792771	0.913877713	0.019084942
cg20512925	15	48235115	4.40E-05	0.031477301	-0.529182837	17.35653596	0.30228976	0.489467574	B4	NA	0.918812667	0.900446079	-0.018366588
cg17989051	3	158683982	4.41E-05	0.031562702	-0.624321749	17.34904905	0.302294589	0.489475393	B4	NA	0.934975469	0.919425366	-0.015550103
cg17619619	5	90361979	4.43E-05	0.031634457	0.233536702	17.34246159	0.302298838	0.489482272	B4	ADGRV1	0.842359723	0.869910938	0.027551215
cg11172930	X	68721481	4.43E-05	0.031635006	0.158371188	17.34048617	0.302300112	0.489484335	B4	NA	0.791486486	0.833823282	0.042336797
cg00381193	5	170042332	4.44E-05	0.031641344	-0.438442392	17.33620202	0.302302875	0.48948881	B4	KCNIP1	0.537767576	0.510575215	-0.027192361
cg22565309	6	25434076	4.44E-05	0.031641344	0.273219715	17.33648374	0.302302693	0.489488516	B4	LRRC16A	0.818589406	0.850472664	0.031883259
cg15095482	17	61190825	4.46E-05	0.031703329	0.336423804	17.33026427	0.302306705	0.489495011	B4	MIR548W;TANC2	0.715807758	0.772523901	0.056716143
cg00752973	14	75114694	4.48E-05	0.031725095	0.431790364	17.32051314	0.302312995	0.489505196	B4	NA	0.778342013	0.789259159	0.010917146
cg07324116	5	80060102	4.48E-05	0.031725095	0.237596076	17.31729326	0.302315072	0.48950856	B4	MSH3	0.797406588	0.840557093	0.043150505
cg13468144	17	4081428	4.47E-05	0.031725095	-0.435931799	17.32177398	0.302312182	0.489503879	B4	ANKFY1	0.352402379	0.384559019	0.03215664
cg13895329	19	46527458	4.47E-05	0.031725095	0.290728115	17.3235104	0.302311062	0.489502066	B4	PGLYRP1	0.803926411	0.854539436	0.050613024
cg18236066	12	113293823	4.48E-05	0.031725095	0.451770972	17.31814338	0.302314524	0.489507672	B4	RPH3A	0.550125237	0.579388089	0.029262852
cg20555854	8	142231133	4.47E-05	0.031725095	0.285909848	17.32547488	0.302309795	0.489500014	B4	SLC45A4	0.912390322	0.923670847	0.011280525
cg20108872	7	127595297	4.49E-05	0.031742807	0.333475737	17.31423024	0.302317048	0.489511759	B4	SND1	0.920760365	0.931126324	0.010365959
cg10158707	5	116102379	4.50E-05	0.031782567	-0.172932619	17.30975044	0.302319938	0.489516439	B4	NA	0.615864278	0.580899743	-0.034964535
cg16061885	3	101556884	4.51E-05	0.031829793	0.427946171	17.30479598	0.302323135	0.489521614	B4	NFKBIZ	0.53356424	0.59679578	0.06323154
cg04215511	16	76310816	4.53E-05	0.031937293	0.203647039	17.29493939	0.302329494	0.489531911	B4	CNTNAP4	0.855855061	0.870148495	0.014293434
cg06995969	8	131369034	4.53E-05	0.031937293	0.324011063	17.29407069	0.302330054	0.489532818	B4	ASAP1	0.392522918	0.459847308	0.06732439
cg23263840	17	33382216	4.54E-05	0.031972273	-0.273567063	17.28991995	0.302332732	0.489537155	B4	RFFL;RAD51L3-RFFL	0.864771265	0.806405348	-0.058365917
cg25370025	2	85231178	4.56E-05	0.032079389	-0.326332281	17.28117007	0.302338378	0.489546296	B4	KCMF1	0.920390633	0.904200011	-0.016190623
cg01673784	16	88841221	4.59E-05	0.032244743	0.4929893	17.26874889	0.302346393	0.489559274	B4	PIEZO1	0.757755715	0.774542252	0.016786537
cg14164839	1	26823481	4.62E-05	0.032419951	-0.180909787	17.25385828	0.302356003	0.489574834	B4	NA	0.604433103	0.572144431	-0.032288672
cg23039316	12	6452051	4.62E-05	0.032419951	0.343319708	17.2551576	0.302355164	0.489573476	B4	TNFRSF1A	0.908424291	0.921286896	0.012862605
cg05058316	6	168786787	4.64E-05	0.032430966	-0.280763438	17.24554391	0.302361368	0.489583522	B4	NA	0.834022194	0.802315052	-0.031707143
cg05089897	21	38886664	4.65E-05	0.032430966	0.31183679	17.24147536	0.302363994	0.489587774	B4	DYRK1A	0.508600747	0.59744046	0.088839713
cg06872964_TC21	1	78619565	4.63E-05	0.032430966	-0.201537642	17.25068493	0.30235805	0.48957815	C0	IFI44L	0.474068635	0.431396826	-0.042671809
cg07185592	1	197733005	4.66E-05	0.032430966	0.275886678	17.23949499	0.302365272	0.489589843	B4	DENND1B	0.922475115	0.936120402	0.013645287
cg12897860	15	48647789	4.67E-05	0.032430966	0.561068789	17.23472698	0.30236835	0.489594826	B4	NA	0.45990811	0.480529947	0.020621837
cg14817691	15	96582239	4.67E-05	0.032430966	0.229562291	17.23567154	0.30236774	0.489593839	B4	NA	0.8609171	0.886315494	0.025398394
cg15339539	3	184890598	4.65E-05	0.032430966	0.209473213	17.24459521	0.302361981	0.489584513	B4	EHHADH-AS1	0.875979808	0.898530886	0.022551078
cg17418742	11	15602030	4.66E-05	0.032430966	0.269009488	17.23852081	0.302365901	0.489590861	B4	NA	0.736054348	0.800000814	0.063946466
cg19684776	1	222763335	4.67E-05	0.032430966	-0.398623421	17.2342168	0.302368679	0.48959536	B4	TAF1A-AS1;TAF1A	0.060701519	0.057672671	-0.003028847
cg27216853	2	10205672	4.66E-05	0.032430966	0.32434905	17.2404269	0.302364671	0.48958887	B4	CYS1	0.553752629	0.590600085	0.036847456
cg07845483	19	10990043	4.69E-05	0.032525392	-0.457433568	17.22468775	0.30237483	0.489605319	B4	CARM1	0.752629634	0.711145219	-0.041484415
cg23559544	14	95961108	4.70E-05	0.032525392	-0.414944108	17.22262432	0.302376162	0.489607475	B4	NA	0.227433452	0.242385125	0.014951673
cg25111284	3	66504370	4.70E-05	0.032525392	0.376100913	17.2230261	0.302375902	0.489607055	B4	LRIG1	0.849930291	0.870746607	0.020816316
cg24412760	2	239113423	4.72E-05	0.03268664	0.186397584	17.21063657	0.3023839	0.489620005	B4	ILKAP	0.740759531	0.796321781	0.05556225
cg22027837	1	55320014	4.74E-05	0.032773272	0.340993363	17.20153144	0.302389778	0.489629523	B4	DHCR24	0.930182681	0.93555293	0.00537025
cg22807822	19	11289365	4.74E-05	0.032773272	-0.28953331	17.20147321	0.302389815	0.489629583	B4	KANK2	0.803693412	0.800575737	-0.003117675
cg14537533	12	52626904	4.76E-05	0.032827157	0.209012767	17.19624156	0.302393193	0.489635052	B4	KRT7	0.050352418	0.067824538	0.01747212
cg15473026	11	130170452	4.76E-05	0.032836069	0.404932953	17.19381441	0.30239476	0.489637589	B4	ZBTB44	0.937965835	0.941412898	0.003447063
cg00920130	5	169694350	4.82E-05	0.033194509	-0.372893753	17.16975782	0.302410292	0.489662739	B4	LCP2	0.383104967	0.34526129	-0.037843677
cg00358010	1	221338314	4.83E-05	0.03319726	-0.441933033	17.16602848	0.3024127	0.489666639	B4	NA	0.282335231	0.277479684	-0.004855548
cg06430309	7	2397685	4.83E-05	0.03319726	0.28998899	17.16398786	0.302414018	0.489668772	B4	EIF3B	0.852766828	0.891572707	0.038805879
cg08631528	10	14051445	4.83E-05	0.03319726	0.169561499	17.164915	0.302413419	0.489667803	B4	FRMD4A	0.423516244	0.44747309	0.023956847
cg01618932	1	68151160	4.88E-05	0.033405429	-0.4320355	17.1455958	0.302425895	0.489688003	B4	GADD45A	0.050967705	0.049676505	-0.0012912
cg09477573	8	48290341	4.89E-05	0.033405429	0.315580142	17.14191669	0.302428271	0.489691851	B4	SPIDR	0.620034365	0.684274627	0.064240262
cg10402995	1	248903325	4.88E-05	0.033405429	0.297590938	17.14317017	0.302427461	0.48969054	B4	LOC646627	0.538406027	0.570563691	0.032157664
cg16416759	12	95186935	4.87E-05	0.033405429	0.303773784	17.14908812	0.30242364	0.489684352	B4	NA	0.355875931	0.38705538	0.031179449
cg18115174	12	116725771	4.88E-05	0.033405429	0.40168908	17.14216651	0.30242811	0.489691589	B4	NA	0.481368551	0.555157619	0.073789068
cg12663684	10	75570314	4.90E-05	0.033480007	0.597026228	17.13550628	0.302432411	0.489698554	B4	NDST2	0.211521555	0.244883444	0.033361889
cg06019050	4	83928766	4.91E-05	0.033499166	0.304341561	17.13248469	0.302434363	0.489701714	B4	LIN54	0.778527863	0.811458328	0.032930465
cg08065565	19	8008274	4.91E-05	0.033507862	-0.468667171	17.13010328	0.302435901	0.489704205	B4	TIMM44	0.06527717	0.063225016	-0.002052153
cg01436487	7	1890148	4.93E-05	0.033601004	-0.337101474	17.1225194	0.302440799	0.489712136	B4	MAD1L1	0.662594401	0.639009141	-0.023585261
cg07161341	4	38110932	4.94E-05	0.033601004	0.242512924	17.12073568	0.302441951	0.489714002	B4	TBC1D1	0.924703331	0.937191549	0.012488218
cg06489912	12	51015475	4.97E-05	0.033783862	0.414912801	17.1078041	0.302450304	0.489727527	B4	DIP2B	0.882044852	0.887873727	0.005828876
cg06988336	16	89922397	4.99E-05	0.033874474	0.206794452	17.10048923	0.302455029	0.489735178	B4	SPIRE2	0.825418188	0.853697711	0.028279522
cg10036918	7	103969166	5.00E-05	0.033926257	0.348278495	17.09552711	0.302458235	0.489740368	B4	LHFPL3	0.014198951	0.017360432	0.00316148
cg18683292	16	76508259	5.03E-05	0.034078718	0.088112643	17.08269043	0.302466528	0.489753796	B4	CNTNAP4	0.770984604	0.852249848	0.081265244
cg18815674	22	26655629	5.03E-05	0.034078718	-0.278446521	17.08301309	0.302466319	0.489753459	B4	SEZ6L	0.106165266	0.099325004	-0.006840262
cg26326621	14	77332983	5.04E-05	0.034123109	0.159199589	17.07819487	0.302469432	0.489758499	B4	C14orf166B	0.768203068	0.788793285	0.020590217
cg03699462	1	185284707	5.07E-05	0.034128845	0.320078221	17.06503769	0.302477933	0.489772264	B4	IVNS1ABP	0.708131598	0.723302147	0.015170549
cg06465076	5	96027378	5.07E-05	0.034128845	-0.342799189	17.06515958	0.302477855	0.489772137	B4	CAST	0.423119702	0.477205933	0.054086231
cg17136839	7	139040622	5.07E-05	0.034128845	0.727735711	17.06525333	0.302477794	0.489772038	B4	NA	0.950561294	0.94612091	-0.004440385
cg17408994	2	236992199	5.05E-05	0.034128845	-0.470209211	17.07550452	0.302471171	0.489761314	B4	AGAP1	0.919247202	0.895610629	-0.023636573
cg17765629	12	105898262	5.06E-05	0.034128845	0.246344218	17.07011949	0.30247465	0.489766947	B4	NA	0.763778167	0.793120747	0.02934258
cg27013931	16	30674490	5.05E-05	0.034128845	-0.372847317	17.07268066	0.302472995	0.489764268	B4	FBRS	0.928024765	0.916851451	-0.011173314
cg27182880	5	16623360	5.07E-05	0.034128845	0.281196578	17.06607157	0.302477265	0.489771182	B4	LOC101929524	0.734975329	0.771560985	0.036585656
cg00771778	1	235998714	5.10E-05	0.034192266	0.223993055	17.05457026	0.302484697	0.489783216	B4	LYST	0.869319066	0.89844519	0.029126125
cg01491932	11	70535168	5.09E-05	0.034192266	0.254021689	17.05921059	0.302481699	0.489778361	B4	SHANK2	0.91824895	0.928011545	0.009762595
cg04486536	5	169572695	5.10E-05	0.034192266	0.552898064	17.0523152	0.302486154	0.489785575	B4	NA	0.186589899	0.22574014	0.039150241
cg19905351	10	76144671	5.10E-05	0.034192266	0.676816413	17.05214401	0.302486265	0.489785754	B4	ADK	0.31855523	0.365772316	0.047217085
cg25511363	10	101945677	5.10E-05	0.034192266	-0.332095497	17.05317051	0.302485602	0.48978468	B4	ERLIN1	0.024524956	0.024124994	-0.000399962
cg09207372	8	38763116	5.17E-05	0.034583627	0.485032632	17.02528023	0.302503626	0.489813865	B4	PLEKHA2	0.28886359	0.340136025	0.051272435
cg09247619	1	198648849	5.17E-05	0.034583627	-0.592238939	17.02652681	0.30250282	0.48981256	B4	PTPRC	0.329832465	0.321927629	-0.007904836
cg05921767	5	139044215	5.18E-05	0.034612754	-0.221375768	17.02174962	0.302505908	0.48981756	B4	CXXC5	0.240161376	0.225608003	-0.014553373
cg04051889	16	85028024	5.20E-05	0.034689566	0.282630831	17.01536132	0.302510036	0.489824245	B4	ZDHHC7	0.827714681	0.861310068	0.033595386
cg04087681	9	108640112	5.20E-05	0.034689566	-0.258204847	17.01304179	0.302511536	0.489826673	B4	NA	0.905645659	0.895780401	-0.009865257
cg18709562	20	20248696	5.21E-05	0.034689566	0.243008307	17.01179845	0.302512339	0.489827974	B4	CFAP61	0.701204653	0.75047542	0.049270768
cg02369308	12	12000852	5.22E-05	0.034693646	0.386652111	17.00614668	0.302515993	0.489833889	B4	RNU6-19P;ETV6	0.603959599	0.654996235	0.051036636
cg13973074	1	249080767	5.22E-05	0.034693646	0.282486643	17.00652797	0.302515746	0.48983349	B4	NA	0.385543504	0.433504099	0.047960595
cg14750782	17	4119394	5.21E-05	0.034693646	-0.279549248	17.00922612	0.302514002	0.489830666	B4	ANKFY1	0.927210537	0.905078941	-0.022131595
cg12071423	22	22555873	5.24E-05	0.034756371	0.300765984	17.00065919	0.30251954	0.489839633	B4	NA	0.482958458	0.502794904	0.019836446
cg21126583	7	145813421	5.26E-05	0.034897781	0.156521064	16.99057334	0.302526059	0.48985019	B4	CNTNAP2	0.080289276	0.104485737	0.024196461
cg03331924	1	208038413	5.29E-05	0.035001083	-0.33330866	16.9809483	0.302532282	0.489860265	B4	NA	0.742081676	0.733808551	-0.008273125
cg09828520	12	58169646	5.28E-05	0.035001083	0.894260595	16.98216404	0.302531496	0.489858992	B4	METTL21B	0.472649856	0.484539748	0.011889892
cg13485293	19	18279106	5.30E-05	0.035045556	0.765038606	16.975387	0.302535877	0.489866086	B4	PIK3R2	0.368279858	0.371348633	0.003068775
cg27060220	5	74753673	5.30E-05	0.035045556	0.348916613	16.97477062	0.302536276	0.489866732	B4	COL4A3BP	0.825539891	0.851192733	0.025652842
cg06559916	2	103042386	5.31E-05	0.035048765	0.186486855	16.97279299	0.302537554	0.489868802	B4	IL18RAP	0.627873772	0.707310421	0.079436649
cg07868909	6	137114217	5.32E-05	0.035117731	-0.306081639	16.96699242	0.302541304	0.489874874	B4	MAP3K5	0.076758306	0.07066422	-0.006094086
cg27007807	20	46355955	5.33E-05	0.035133575	0.413958208	16.9642845	0.302543055	0.489877709	B4	SULF2	0.433223893	0.478256128	0.045032236
cg00388871	20	62530407	5.36E-05	0.035289862	0.372168225	16.95344213	0.302550066	0.489889061	B4	DNAJC5	0.262829046	0.312553181	0.049724135
cg14304326	16	50369262	5.37E-05	0.035323689	-0.141202267	16.9479849	0.302553594	0.489894774	B4	BRD7	0.443026771	0.370908931	-0.072117841
cg18330536	7	23327266	5.37E-05	0.035323689	-0.639639109	16.94792041	0.302553636	0.489894842	B4	NA	0.340963408	0.37032717	0.029363762
cg25205240	19	11350146	5.38E-05	0.035357678	-0.518596578	16.9441771	0.302556057	0.489898761	B4	DOCK6;C19orf80	0.580806797	0.579319617	-0.00148718
cg04404543	12	54019307	5.40E-05	0.035396389	0.48155182	16.93661088	0.302560949	0.489906684	B4	ATF7	0.49503177	0.520209125	0.025177356
cg04574358	6	43349415	5.40E-05	0.035396389	0.638806492	16.93756206	0.302560334	0.489905688	B4	NA	0.428058246	0.477718465	0.049660219
cg13184651	20	37390401	5.40E-05	0.035396389	0.687860201	16.93684037	0.302560801	0.489906443	B4	ACTR5	0.286278214	0.342524087	0.056245872
cg07247797	1	41746150	5.43E-05	0.035545295	0.635870088	16.925016	0.302568448	0.489918825	B4	NA	0.39906581	0.425355585	0.026289775
cg15331115	6	130013600	5.43E-05	0.035545295	0.345926592	16.92449902	0.302568782	0.489919366	B4	ARHGAP18	0.81476176	0.855333777	0.040572016
cg00161124	1	234366259	5.45E-05	0.03559925	-0.338059272	16.91963346	0.302571929	0.489924461	B4	SLC35F3	0.164828221	0.156377583	-0.008450638
cg06121272	22	41018064	5.46E-05	0.035612336	0.293874836	16.91534544	0.302574702	0.489928952	B4	MKL1	0.375677924	0.435397204	0.05971928
cg20018022	17	35851415	5.46E-05	0.035612336	0.130248772	16.91603208	0.302574258	0.489928233	B4	DUSP14	0.551414747	0.648341245	0.096926498
cg10813029	18	3715502	5.48E-05	0.035686419	0.290296153	16.9086173	0.302579054	0.489935998	B4	DLGAP1	0.737491981	0.758802431	0.021310449
cg15073115	13	105187317	5.48E-05	0.035686419	-0.363656799	16.90636683	0.302580509	0.489938355	B4	NA	0.912991502	0.905194582	-0.00779692
cg22145857	3	128433867	5.48E-05	0.035686419	0.532445093	16.90581087	0.302580869	0.489938937	B4	NA	0.573938403	0.588843065	0.014904662
cg04118695	17	15142509	5.49E-05	0.035692522	0.320025295	16.90369996	0.302582234	0.489941148	B4	PMP22	0.9283524	0.93474982	0.006397419
cg01168339	12	120935726	5.51E-05	0.035770168	0.356721771	16.89750721	0.30258624	0.489947634	B4	DYNLL1	0.886440319	0.893812365	0.007372046
cg15809217	6	31607648	5.52E-05	0.035830812	-0.257658856	16.89229343	0.302589612	0.489953095	B4	BAT3	0.294696742	0.298874346	0.004177604
cg21389750	9	123869283	5.54E-05	0.035933281	0.481658244	16.88471198	0.302594517	0.489961036	B4	CNTRL	0.521077223	0.570705662	0.049628439
cg00156232	7	65417317	5.58E-05	0.036114984	-0.257143545	16.87091595	0.302603441	0.489975487	B4	VKORC1L1	0.592332627	0.599250498	0.00691787
cg11601519	21	15451242	5.58E-05	0.036114984	-0.631407377	16.87131335	0.302603184	0.48997507	B4	NA	0.979476993	0.974714009	-0.004762984
cg13011182	10	73083223	5.62E-05	0.036336372	-0.76223437	16.85670174	0.302612638	0.489990377	B4	SLC29A3	0.304841054	0.335249052	0.030407999
cg04674832	2	72078638	5.65E-05	0.036507703	-0.640991453	16.84361032	0.302621108	0.490004093	B4	NA	0.428497779	0.437299645	0.008801866
cg07154858	5	137704938	5.65E-05	0.036507703	0.380343793	16.84470079	0.302620403	0.49000295	B4	KDM3B	0.644201395	0.686295816	0.042094421
cg03685475	22	41597321	5.67E-05	0.036556586	0.433356648	16.83738825	0.302625134	0.490010612	B4	NA	0.221739709	0.257254492	0.035514783
cg20376277	5	16615924	5.67E-05	0.036556586	0.214405401	16.83803655	0.302624715	0.490009933	B4	FAM134B;LOC101929524	0.523381981	0.577811403	0.054429421
cg01632240	8	42009223	5.70E-05	0.036710188	0.618753908	16.82630068	0.302632309	0.490022229	B4	AP3M2	0.372720621	0.424090246	0.051369625
cg09712616	16	11892591	5.71E-05	0.036710188	0.254280606	16.82530893	0.302632951	0.490023269	B4	ZC3H7A	0.846658663	0.863552384	0.016893721
cg10821511	17	47286445	5.71E-05	0.036710188	0.769743488	16.82361089	0.30263405	0.490025048	B4	ABI3;GNGT2	0.63107403	0.61754024	-0.01353379
cg06506936	12	68152006	5.72E-05	0.03676007	0.354137565	16.81888134	0.302637111	0.490030004	B4	NA	0.602870131	0.614047857	0.011177726
cg12728588	1	36025489	5.73E-05	0.03676007	0.331584371	16.81736421	0.302638092	0.490031594	B4	NCDN	0.818863449	0.841492714	0.022629265
cg27542301	1	203256315	5.78E-05	0.03704404	-0.365465588	16.79994178	0.302649368	0.490049852	B4	LINC01353	0.061309131	0.057791235	-0.003517896
cg07748253	5	14306269	5.79E-05	0.037077373	0.221806169	16.79637324	0.302651678	0.490053591	B4	TRIO	0.75700644	0.812191908	0.055185469
cg07007841	11	77919886	5.81E-05	0.037210044	0.401208348	16.78735975	0.302657512	0.490063038	B4	USP35	0.817788038	0.842538945	0.024750907
cg20959965	X	37606012	5.82E-05	0.037213924	0.389520683	16.78541496	0.302658771	0.490065076	B4	NA	0.489045571	0.505376677	0.016331106
cg00843606	2	30146441	5.82E-05	0.037227279	-0.425361698	16.78295295	0.302660365	0.490067657	B4	NA	0.902612269	0.884826889	-0.01778538
cg09443515	11	102214688	5.83E-05	0.037241818	-0.440277303	16.78042795	0.302661999	0.490070304	B4	NA	0.651581002	0.67358287	0.022001868
cg03782775	20	2967463	5.85E-05	0.03725223	-0.359436207	16.77520788	0.302665378	0.490075775	B4	PTPRA	0.463317945	0.457267234	-0.006050711
cg05926904	10	51571362	5.85E-05	0.03725223	0.397074014	16.77295605	0.302666836	0.490078135	B4	TIMM23B;NCOA4	0.552217602	0.590010149	0.037792547
cg15655655	7	87843586	5.85E-05	0.03725223	0.301580367	16.77359494	0.302666423	0.490077466	B4	SRI	0.903371182	0.922946107	0.019574926
cg24690314	6	144018564	5.85E-05	0.03725223	0.235832708	16.77400444	0.302666157	0.490077036	B4	PHACTR2	0.427551321	0.531674583	0.104123262
cg01303420	3	157296174	5.89E-05	0.037272002	-0.237190615	16.76179552	0.302674061	0.490089834	B4	C3orf55	0.867193021	0.814915677	-0.052277344
cg07182084	15	101484583	5.90E-05	0.037272002	0.299297345	16.75599265	0.302677818	0.490095917	B4	LRRK1	0.841265107	0.847956358	0.006691251
cg09566189	8	108896455	5.90E-05	0.037272002	0.256241294	16.75613814	0.302677724	0.490095765	B4	NA	0.841269253	0.870589224	0.029319972
cg11341144	3	185656289	5.91E-05	0.037272002	0.262875813	16.75328055	0.302679574	0.49009876	B4	TRA2B	0.502171811	0.602631728	0.100459916
cg11655319	14	76983563	5.86E-05	0.037272002	-0.444728764	16.76993984	0.302668789	0.490081297	B4	NA	0.481947579	0.470673177	-0.011274402
cg13166622	3	150904863	5.88E-05	0.037272002	0.322818244	16.76206887	0.302673884	0.490089548	B4	MED12L	0.50960903	0.542639423	0.033030393
cg17987666	11	116025363	5.89E-05	0.037272002	-0.502583491	16.760346	0.302675	0.490091354	B4	NA	0.917688507	0.897053321	-0.020635186
cg19642604	2	201287749	5.88E-05	0.037272002	-0.327516685	16.76507145	0.30267194	0.4900864	B4	SPATS2L	0.922847231	0.910699233	-0.012147998
cg20012607	13	100085455	5.90E-05	0.037272002	-0.375463479	16.75694674	0.3026772	0.490094917	B4	NA	0.09925408	0.087529165	-0.011724915
cg23489671	10	14614245	5.91E-05	0.037272002	0.26733761	16.75301518	0.302679746	0.490099039	B4	FAM107B	0.607963799	0.649668038	0.041704239
cg24771289	14	102966893	5.88E-05	0.037272002	-0.380554351	16.76298415	0.302673292	0.490088588	B4	TECPR2	0.26741379	0.268669309	0.00125552
cg14463638	13	73721126	5.92E-05	0.037286216	0.365377422	16.75053254	0.302681353	0.490101641	B4	NA	0.567922049	0.636018768	0.068096719
cg02805890	6	27778836	5.93E-05	0.037335963	-0.309261043	16.74611164	0.302684215	0.490106276	B4	NA	0.125311474	0.111349778	-0.013961696
cg16239521	16	67523838	5.95E-05	0.037399965	0.354436132	16.74091924	0.302687577	0.490111719	B4	NA	0.855279562	0.87284555	0.017565988
cg02604407	7	87849519	5.96E-05	0.03747184	0.604245442	16.73530634	0.302691212	0.490117604	B4	SRI	0.02254855	0.026273961	0.003725411
cg15700636	11	57156050	5.98E-05	0.037560416	0.387741653	16.72873681	0.302695466	0.490124492	B4	PRG2	0.851658149	0.860513135	0.008854986
cg18492107	15	85290752	5.99E-05	0.037560416	0.484185162	16.72709817	0.302696527	0.49012621	B4	ZNF592	0.11134582	0.125555154	0.014209334
cg00723424	22	44526144	6.00E-05	0.037584779	0.198001641	16.72408029	0.302698481	0.490129375	B4	PARVB	0.783959433	0.806515468	0.022556036
cg02434443	11	15136456	6.04E-05	0.037774896	0.350887556	16.70754041	0.302709192	0.490146718	B4	INSC	0.021844537	0.029101981	0.007257444
cg04464122	11	34457835	6.05E-05	0.037774896	0.308519465	16.70702918	0.302709523	0.490147254	B4	NA	0.467973505	0.508512501	0.040538996
cg19772747	1	41302182	6.03E-05	0.037774896	0.621016426	16.71152524	0.302706611	0.490142539	B4	KCNQ4	0.591215794	0.605698738	0.014482944
cg26318872	14	104158729	6.04E-05	0.037774896	-0.318008309	16.70986519	0.302707686	0.49014428	B4	KLC1	0.945385769	0.933823872	-0.011561897
cg03159660	11	2078197	6.05E-05	0.037790055	0.320441416	16.70452228	0.302711147	0.490149883	B4	NA	0.753117515	0.744257938	-0.008859577
cg08571362	7	100224015	6.08E-05	0.037893342	-0.44027225	16.6972747	0.30271584	0.490157483	B4	TFR2	0.193197036	0.186674666	-0.00652237
cg19709786	6	135059368	6.09E-05	0.037971433	0.250059263	16.69139501	0.302719649	0.490163649	B4	NA	0.530317418	0.603264674	0.072947255
cg20918393	20	19867136	6.10E-05	0.037972409	0.137247025	16.68965736	0.302720774	0.490165472	B4	NA	0.90286071	0.929292968	0.026432258
cg22851880	1	36038701	6.11E-05	0.038024745	-0.222972311	16.6851684	0.302723682	0.49017018	B4	TFAP2E	0.689270796	0.650661205	-0.038609591
cg14325814	3	32139560	6.12E-05	0.038035264	0.29864474	16.68124167	0.302726225	0.490174298	B4	NA	0.370790376	0.405689008	0.034898633
cg21394039	18	77116310	6.12E-05	0.038035264	-0.275305066	16.68254384	0.302725382	0.490172932	B4	ATP9B	0.944637838	0.933618025	-0.011019813
cg00778995	2	105470558	6.15E-05	0.038123016	0.628244954	16.67363561	0.302731152	0.490182275	B4	POU3F3	0.023182708	0.026705793	0.003523086
cg25621420	11	62689654	6.15E-05	0.038123016	0.203013322	16.67319092	0.30273144	0.490182742	B4	CHRM1	0.837498034	0.859923692	0.022425658
cg02360587	17	64575563	6.17E-05	0.038170087	-0.241655506	16.66732602	0.302735239	0.490188893	B4	PRKCA	0.85843098	0.840426839	-0.018004141
cg06621262	6	18277070	6.16E-05	0.038170087	-0.242343358	16.66871193	0.302734341	0.49018744	B4	NA	0.50533897	0.48009842	-0.02524055
cg23123679	12	49351256	6.17E-05	0.038182051	-0.516160222	16.66501397	0.302736737	0.490191319	B4	ARF3	0.081117147	0.078595395	-0.002521752
cg26771582	16	87415899	6.19E-05	0.038287516	0.240196983	16.65772472	0.302741459	0.490198965	B4	FBXO31	0.236587646	0.282130177	0.045542531
cg16015295	17	78793479	6.23E-05	0.038477606	-0.314024274	16.64596979	0.302749074	0.490211296	B4	RPTOR	0.410355197	0.402901056	-0.00745414
cg11424260	12	110815731	6.24E-05	0.038494926	0.268718414	16.64338396	0.30275075	0.490214008	B4	ANAPC7	0.572188414	0.654534212	0.082345799
cg10251538	3	108800886	6.24E-05	0.038496024	-0.359022414	16.64165774	0.302751868	0.490215819	B4	MORC1	0.251286227	0.231752833	-0.019533394
cg03607951_TO21	1	78619901	6.26E-05	0.038556428	-0.162513562	16.63652633	0.302755193	0.490221203	C0	IFI44L	0.59330498	0.577841629	-0.015463351
cg22281380	7	50861467	6.26E-05	0.038556428	0.233841796	16.63513353	0.302756095	0.490222664	B4	GRB10	0.038980361	0.049563724	0.010583363
cg05807666	8	121769788	6.28E-05	0.03857054	0.230193633	16.63106195	0.302758733	0.490226935	B4	SNTB1	0.110295017	0.1331539	0.022858883
cg08471846	19	799621	6.27E-05	0.03857054	0.410988981	16.63191426	0.302758181	0.490226041	B4	PTBP1	0.314473629	0.336704497	0.022230868
cg11673734	10	125187143	6.28E-05	0.038578505	0.545546597	16.62898034	0.302760082	0.490229119	B4	NA	0.255611696	0.313202139	0.057590443
cg02839202	11	73117693	6.30E-05	0.038621062	0.251295278	16.62246103	0.302764306	0.490235959	B4	FAM168A	0.917963917	0.938450874	0.020486957
cg06070496	18	3706638	6.30E-05	0.038621062	0.392818831	16.62239012	0.302764352	0.490236034	B4	DLGAP1	0.571323421	0.605045225	0.033721804
cg10437902	14	57715629	6.30E-05	0.038621062	0.333872216	16.62176055	0.30276476	0.490236694	B4	EXOC5	0.895103993	0.912450158	0.017346165
cg02915275	3	18459048	6.34E-05	0.038825792	0.298636516	16.60934263	0.302772807	0.490249724	B4	SATB1	0.758880732	0.800450968	0.041570236
cg08656159	9	140487351	6.35E-05	0.038832074	0.510025172	16.60669126	0.302774525	0.490252506	B4	NA	0.601397298	0.635877367	0.034480069
cg17420862	6	14884343	6.36E-05	0.038832074	0.392837786	16.60405472	0.302776234	0.490255272	B4	NA	0.396506082	0.432148897	0.035642815
cg19668630	6	37856905	6.36E-05	0.038832074	0.302497289	16.60503016	0.302775602	0.490254249	B4	ZFAND3	0.86951563	0.89748085	0.02796522
cg00706275	10	94591097	6.38E-05	0.038918217	-0.461546338	16.59624566	0.302781295	0.490263467	B4	NA	0.198126076	0.193258212	-0.004867864
cg14615559	9	130911577	6.38E-05	0.038918217	-0.543783664	16.59704842	0.302780775	0.490262624	B4	LCN2	0.30147934	0.32413501	0.02265567
cg11002060	3	105904770	6.39E-05	0.038919633	-0.538691338	16.59402911	0.302782731	0.490265793	B4	NA	0.942376597	0.931843717	-0.010532879
cg17215831	13	37004853	6.39E-05	0.038919633	-0.243640112	16.59287821	0.302783477	0.490267001	B4	CCNA1	0.16517469	0.138642326	-0.026532364
cg07125725	7	99612773	6.40E-05	0.038936579	0.286811863	16.59034756	0.302785117	0.490269656	B4	ZKSCAN1	0.813162831	0.82560202	0.012439189
cg11571108	14	24863662	6.41E-05	0.038941058	0.452075359	16.58847014	0.302786334	0.490271627	B4	NA	0.411871808	0.433874342	0.022002534
cg00898584	3	71593601	6.42E-05	0.038972557	0.253213809	16.58354195	0.302789528	0.490276798	B4	FOXP1	0.607417782	0.686592179	0.079174397
cg14830216	6	89733625	6.42E-05	0.038972557	0.300505287	16.58425059	0.302789069	0.490276055	B4	NA	0.678622585	0.701325594	0.02270301
cg26893685	6	2523615	6.43E-05	0.038994936	-0.347473441	16.58073444	0.302791348	0.490279745	B4	NA	0.290143225	0.303491824	0.013348599
cg08908247	11	66055170	6.45E-05	0.039031494	0.598365049	16.57555292	0.302794706	0.490285183	B4	YIF1A	0.285131469	0.325621576	0.040490107
cg14127324	5	142176214	6.45E-05	0.039031494	0.317668605	16.57619664	0.302794289	0.490284507	B4	ARHGAP26	0.840166696	0.853186627	0.013019931
cg02395454	11	134605862	6.46E-05	0.039064044	-0.303238893	16.57085172	0.302797754	0.490290117	B4	NA	0.588903949	0.561938607	-0.026965342
cg20989280	1	160343735	6.47E-05	0.039064044	0.324940436	16.57058748	0.302797925	0.490290394	B4	NA	0.5365394	0.604517147	0.067977747
cg01370179	X	153218937	6.52E-05	0.039329735	0.214040815	16.55249676	0.302809652	0.490309383	B4	HCFC1	0.137529082	0.15801565	0.020486568
cg20545490	1	17697680	6.51E-05	0.039329735	0.269513428	16.55504768	0.302807998	0.490306705	B4	PADI6	0.471628472	0.529900039	0.058271567
cg21071466	2	74805822	6.52E-05	0.039329735	0.371535799	16.55190101	0.302810038	0.490310008	B4	M1AP	0.459170083	0.505551648	0.046381565
cg01856141	3	52804944	6.54E-05	0.03936381	-0.363971439	16.54826635	0.302812394	0.490313823	B4	NEK4	0.031581947	0.032253761	0.000671814
cg10852119	6	159516272	6.56E-05	0.03936381	-0.50626069	16.54201017	0.30281645	0.490320391	B4	NA	0.645942054	0.614104725	-0.031837329
cg14303526	10	101609768	6.55E-05	0.03936381	0.263439286	16.54259895	0.302816069	0.490319772	B4	ABCC2	0.646528354	0.706862563	0.060334209
cg15112458	7	104654695	6.54E-05	0.03936381	0.390587408	16.54565321	0.302814088	0.490316566	B4	LOC100216545;MLL5	0.020553731	0.026244836	0.005691104
cg24217726	3	57312921	6.55E-05	0.03936381	0.291207203	16.54370787	0.30281535	0.490318608	B4	ASB14	0.908279017	0.919409491	0.011130474
cg09646392_BC21	13	108268704	6.58E-05	0.039470147	0.136426554	16.53489975	0.30282106	0.490327855	C0	TNFSF13B	0.303813221	0.426382205	0.122568984
cg22282590	19	17514117	6.59E-05	0.039477804	-0.247215233	16.53288464	0.302822367	0.49032997	B4	BST2	0.933883482	0.925916285	-0.007967198
cg27630863	18	45428160	6.59E-05	0.039483763	0.29780862	16.53095845	0.302823615	0.490331992	B4	SMAD2	0.368376918	0.410913334	0.042536417
cg07296650	2	43145429	6.64E-05	0.039652778	-0.380144407	16.51739854	0.302832408	0.490346229	B4	NA	0.685797868	0.681876374	-0.003921494
cg11626153	3	141456305	6.64E-05	0.039652778	0.226554762	16.51530914	0.302833762	0.490348422	B4	RNF7	0.84525254	0.880800316	0.035547776
cg15960002	5	139343884	6.65E-05	0.039652778	-0.520460779	16.51353862	0.30283491	0.490350281	B4	NRG2	0.921320736	0.898171625	-0.023149111
cg17972738	19	51965444	6.65E-05	0.039652778	0.455528162	16.51258189	0.302835531	0.490351286	B4	NA	0.562731838	0.588250745	0.025518907
cg22140708	6	10081664	6.65E-05	0.039652778	0.187260978	16.51301886	0.302835247	0.490350827	B4	NA	0.876968936	0.902125923	0.025156987
cg25159046	1	212312063	6.64E-05	0.039652778	0.476646432	16.51617105	0.302833203	0.490347517	B4	NA	0.729819319	0.761943843	0.032124524
cg02413938	2	239008929	6.69E-05	0.039831134	0.179780418	16.50118289	0.302842923	0.490363255	B4	ESPNL	0.618325876	0.659588498	0.041262622
cg21270228	10	62184989	6.69E-05	0.039831134	-0.303702133	16.50023482	0.302843537	0.49036425	B4	ANK3	0.932919449	0.924516867	-0.008402582
cg24815728	5	148421136	6.73E-05	0.039999196	0.279851045	16.49006386	0.302850133	0.49037493	B4	SH3TC2	0.869677379	0.883950177	0.014272798
cg22818215	10	119184588	6.74E-05	0.040009897	0.377715764	16.48715087	0.302852023	0.490377989	B4	NA	0.365936994	0.407014643	0.041077649
cg23115933	17	7814172	6.74E-05	0.040009897	0.709199651	16.48630935	0.302852568	0.490378873	B4	CHD3	0.361526133	0.403484326	0.041958192
cg17890667	7	77469425	6.75E-05	0.040039697	0.340028158	16.48319188	0.30285459	0.490382147	B4	PHTF2	0.835902115	0.857949762	0.022047647
cg08738516	10	126408016	6.75E-05	0.040041721	0.203404708	16.48148708	0.302855696	0.490383937	B4	FAM53B	0.13245155	0.146361764	0.013910214
cg12591090	7	99954465	6.78E-05	0.040188495	0.492549628	16.47244562	0.30286156	0.490393432	B4	STAG3L5P-PVRIG2P-PILRB;PILRB	0.566557087	0.601727308	0.035170221
cg25600606	11	33308345	6.79E-05	0.040211328	-0.545002851	16.4696912	0.302863346	0.490396325	B4	HIPK3	0.374192708	0.408897724	0.034705015
cg07910010	2	223448731	6.81E-05	0.040239064	-0.379159991	16.46349872	0.302867363	0.490402829	B4	FARSB	0.398771701	0.458154922	0.059383221
cg12496433	2	16847763	6.81E-05	0.040239064	-0.243974468	16.46437376	0.302866795	0.49040191	B4	FAM49A	0.262812577	0.245641077	-0.0171715
cg21800396	10	96968197	6.81E-05	0.040239064	0.193109843	16.464583	0.30286666	0.49040169	B4	ACSM6	0.534112418	0.626591349	0.092478931
cg09917807	12	31882282	6.86E-05	0.04047095	-0.293548991	16.45022044	0.302875976	0.490416775	B4	AMN1	0.071456435	0.065465051	-0.005991384
cg05694292	11	122563400	6.87E-05	0.040530448	0.757968265	16.44564063	0.302878947	0.490421586	B4	UBASH3B	0.339973096	0.38528704	0.045313944
cg09553840	8	131217021	6.92E-05	0.040540601	0.22759241	16.43221431	0.302887657	0.490435689	B4	ASAP1	0.827940502	0.87092038	0.042979878
cg11810303	11	109956144	6.89E-05	0.040540601	0.205309174	16.44217841	0.302881193	0.490425222	B4	NA	0.74027462	0.801835784	0.061561164
cg12488134	10	119179575	6.89E-05	0.040540601	0.41257212	16.43995759	0.302882634	0.490427555	B4	NA	0.30827082	0.34176743	0.03349661
cg12782542	12	64336851	6.92E-05	0.040540601	0.465447827	16.43085282	0.302888541	0.490437119	B4	SRGAP1	0.9162145	0.918078522	0.001864022
cg13138147	1	199243235	6.92E-05	0.040540601	0.223654695	16.43126077	0.302888276	0.490436691	B4	NA	0.546107526	0.591052041	0.044944514
cg17444709	12	3182391	6.90E-05	0.040540601	0.153236084	16.43680738	0.302884678	0.490430864	B4	NA	0.733530672	0.777841699	0.044311027
cg18328190	3	37427383	6.91E-05	0.040540601	0.310936224	16.43474718	0.302886014	0.490433028	B4	NA	0.92145111	0.933597213	0.012146102
cg19769287	6	79668315	6.91E-05	0.040540601	0.213206628	16.43640393	0.302884939	0.490431288	B4	PHIP	0.746431405	0.793520696	0.047089291
cg24788483	10	114911652	6.90E-05	0.040540601	0.185950086	16.43947392	0.302882948	0.490428063	B4	TCF7L2	0.803079336	0.829441933	0.026362597
cg07084617	16	17553768	6.94E-05	0.040582752	0.312434216	16.42632866	0.302891476	0.490441872	B4	XYLT1	0.610460342	0.650822469	0.040362127
cg15243205	6	27859478	6.94E-05	0.040582752	-0.243712319	16.42558095	0.302891961	0.490442658	B4	HIST1H3J	0.888856229	0.876125722	-0.012730507
cg21028671	7	2029240	6.95E-05	0.040604052	-0.34995014	16.42293654	0.302893677	0.490445436	B4	MAD1L1	0.909336904	0.878371267	-0.030965637
cg05957477	20	8228450	6.96E-05	0.040617197	0.398697239	16.42070203	0.302895127	0.490447783	B4	PLCB1	0.664285614	0.70628057	0.041994956
cg13174688	18	8801435	6.98E-05	0.040662356	0.223683461	16.41529396	0.302898635	0.490453465	B4	MTCL1	0.903028569	0.915008174	0.011979606
cg20928986	2	231044540	6.98E-05	0.040662356	0.394075049	16.41550741	0.302898497	0.490453241	B4	SP110	0.866564902	0.877590295	0.011025394
cg03462868	9	33816424	6.99E-05	0.040725933	0.418113908	16.4105454	0.302901717	0.490458454	B4	UBE2R2	0.601967724	0.625880067	0.023912343
cg21025059	1	117032216	7.01E-05	0.040762639	-0.635235968	16.40557254	0.302904943	0.490463678	B4	NA	0.395163379	0.39668697	0.001523591
cg25314817	11	95647661	7.01E-05	0.040762639	0.41522831	16.40666203	0.302904236	0.490462534	B4	MTMR2	0.902942739	0.906181145	0.003238406
cg00177203	1	149901142	7.07E-05	0.040907941	0.245501519	16.38738337	0.302916747	0.49048279	B4	SF3B4;MTMR11	0.910783638	0.925161907	0.014378269
cg01156920	8	68293431	7.07E-05	0.040907941	0.175609164	16.38852929	0.302916003	0.490481586	B4	NA	0.80380012	0.851365454	0.047565334
cg01515516	19	14544032	7.06E-05	0.040907941	0.127951195	16.39080269	0.302914528	0.490479197	B4	PKN1	0.131578808	0.180293497	0.048714689
cg04101015	1	159170275	7.07E-05	0.040907941	0.201647599	16.3885822	0.302915969	0.490481531	B4	CADM3	0.725041319	0.761273485	0.036232166
cg11066245	5	39196896	7.07E-05	0.040907941	0.343122234	16.38847662	0.302916037	0.490481642	B4	FYB	0.793110088	0.789955189	-0.003154899
cg12875599	12	121497393	7.06E-05	0.040907941	-0.229363477	16.39224938	0.302913589	0.490477677	B4	NA	0.815365631	0.799354201	-0.016011429
cg20308459	2	224032236	7.05E-05	0.040907941	-0.620447771	16.39344047	0.302912816	0.490476426	B4	NA	0.95170915	0.937631132	-0.014078018
cg02290460	8	619875	7.10E-05	0.04092827	0.234770836	16.38122207	0.302920745	0.490489265	B4	ERICH1	0.854998788	0.880467322	0.025468534
cg02463727	10	79003508	7.12E-05	0.04092827	0.33118914	16.37446027	0.302925133	0.49049637	B4	KCNMA1	0.94835225	0.949918608	0.001566359
cg03256302	5	169730722	7.11E-05	0.04092827	0.378665079	16.37823387	0.302922684	0.490492405	B4	NA	0.401782478	0.433019339	0.031236862
cg04577162	7	73667397	7.10E-05	0.04092827	0.366160632	16.37953829	0.302921838	0.490491034	B4	RFC2	0.558510073	0.606046397	0.047536324
cg10825530	11	16023708	7.09E-05	0.04092827	0.286476781	16.38411294	0.302918869	0.490486227	B4	SOX6	0.417924248	0.452015045	0.034090797
cg15106296	5	153862752	7.11E-05	0.04092827	-0.405490113	16.37645036	0.302923842	0.490494279	B4	NA	0.106067319	0.098913071	-0.007154248
cg18686270	3	146258875	7.12E-05	0.04092827	-0.281049777	16.37392467	0.302925481	0.490496933	B4	PLSCR1	0.94455069	0.922659802	-0.021890888
cg26204803	2	153364045	7.10E-05	0.04092827	-0.577285904	16.37869123	0.302922388	0.490491924	B4	FMNL2	0.934575715	0.916460407	-0.018115308
cg10071700	10	35226979	7.14E-05	0.040977543	0.272756345	16.36992901	0.302928074	0.490501132	B4	NA	0.296549672	0.318100036	0.021550364
cg08376310	11	2858621	7.15E-05	0.041009748	0.103588692	16.36678308	0.302930116	0.490504438	B4	KCNQ1	0.936856875	0.956050684	0.019193809
cg06089705	2	60784792	7.18E-05	0.0410219	-0.423307155	16.35845176	0.302935524	0.490513194	B4	NA	0.048851062	0.047123745	-0.001727317
cg07527426	6	44125473	7.16E-05	0.0410219	-0.318622543	16.36382914	0.302932033	0.490507543	B4	CAPN11	0.867917541	0.838264104	-0.029653437
cg12363342	2	225439130	7.16E-05	0.0410219	0.265820016	16.36169822	0.302933417	0.490509782	B4	CUL3	0.585412268	0.677890214	0.092477946
cg23775411	20	5668835	7.18E-05	0.0410219	-0.20869264	16.3584762	0.302935508	0.490513169	B4	NA	0.416182113	0.419312256	0.003130143
cg24143196	19	14644474	7.17E-05	0.0410219	0.453022285	16.35914347	0.302935075	0.490512467	B4	TECR	0.956438887	0.954142095	-0.002296791
cg20937677	20	5803245	7.19E-05	0.041042709	0.384036401	16.35433791	0.302938194	0.490517518	B4	C20orf196	0.925688121	0.931101125	0.005413004
cg26261940	2	242169525	7.19E-05	0.041042709	0.485809325	16.35472722	0.302937941	0.490517109	B4	HDLBP	0.682982235	0.712224554	0.029242319
cg05213157	20	13802663	7.22E-05	0.041153351	0.232910909	16.34578927	0.302943743	0.490526503	B4	NA	0.734522394	0.800783384	0.06626099
cg09073263	20	61771440	7.22E-05	0.041153351	0.223630959	16.3461469	0.302943511	0.490526127	B4	NA	0.799719714	0.825399538	0.025679823
cg27183435	1	23746677	7.24E-05	0.041221702	0.319586289	16.34088008	0.30294693	0.490531663	B4	TCEA3	0.810141285	0.845983314	0.035842029
cg16777780	17	76862186	7.25E-05	0.041229373	-0.263611258	16.33896579	0.302948172	0.490533675	B4	TIMP2	0.160995122	0.143415512	-0.01757961
cg23497219	12	19411039	7.27E-05	0.041353759	0.291645018	16.33131064	0.302953142	0.490541722	B4	PLEKHA5	0.700543257	0.748774203	0.048230946
cg00201196	16	8738469	7.30E-05	0.041358987	0.685795581	16.32492552	0.302957287	0.490548434	B4	C16orf68	0.542715167	0.570006873	0.027291706
cg00765653	20	57415144	7.30E-05	0.041358987	-1.183330233	16.32503634	0.302957215	0.490548317	B4	GNASAS;GNAS	0.556790646	0.540845038	-0.015945608
cg01355407	5	102117717	7.29E-05	0.041358987	0.259000287	16.3260652	0.302956547	0.490547236	B4	NA	0.821583826	0.856026627	0.034442801
cg07795766	22	45608516	7.29E-05	0.041358987	0.31244464	16.32603299	0.302956568	0.490547269	B4	C22orf9	0.966179787	0.965433751	-0.000746036
cg20650539	6	107363798	7.31E-05	0.041410892	0.421147564	16.32084851	0.302959934	0.49055272	B4	C6orf203	0.596019957	0.608986688	0.012966731
cg01123783	7	147591551	7.32E-05	0.041419259	-0.578713787	16.31891012	0.302961193	0.490554757	B4	CNTNAP2;MIR548F3	0.941436284	0.9280211	-0.013415184
cg14795390	1	165907852	7.33E-05	0.041474082	0.195383127	16.31469637	0.302963928	0.490559187	B4	NA	0.785573511	0.829245892	0.043672381
cg17591474	17	16718123	7.36E-05	0.041609961	0.289531667	16.30652668	0.302969233	0.490567776	B4	NA	0.925098717	0.92969155	0.004592833
cg07457727	8	131451983	7.39E-05	0.04174613	0.247245036	16.29836619	0.302974531	0.490576356	B4	NA	0.861165146	0.883487224	0.022322078
cg17230356	17	75150033	7.42E-05	0.041850191	0.264048001	16.29178648	0.302978804	0.490583274	B4	SEC14L1	0.612011669	0.683348438	0.071336769
cg05273999	6	39788266	7.44E-05	0.041933467	0.466258858	16.28470652	0.302983401	0.490590718	B4	DAAM2	0.938390279	0.937777297	-0.000612982
cg16366262	1	1118157	7.44E-05	0.041933467	-0.144627162	16.28594449	0.302982598	0.490589416	B4	TTLL10	0.126766471	0.097192692	-0.029573778
cg26398797	20	52302538	7.47E-05	0.042050281	0.594398703	16.27753745	0.302988057	0.490598256	B4	NA	0.563897606	0.562762492	-0.001135114
cg15267998	11	34373473	7.47E-05	0.042055233	0.246034176	16.27577994	0.302989198	0.490600104	B4	ABTB2	0.635414681	0.691368656	0.055953975
cg02855936	19	42449790	7.49E-05	0.042109433	0.392374198	16.27013121	0.302992867	0.490606044	B4	NA	0.315706395	0.31897049	0.003264096
cg13786975	7	65790221	7.49E-05	0.042109433	0.54152115	16.27145733	0.302992006	0.49060465	B4	TPST1	0.348278059	0.395076008	0.046797949
cg06528771	2	102513985	7.54E-05	0.042336713	-0.371930113	16.2576858	0.30300095	0.490619132	B4	NA	0.3662777	0.38127747	0.01499977
cg14616533	4	108758755	7.55E-05	0.042345503	0.415246384	16.25575065	0.303002207	0.490621167	B4	SGMS2	0.377384188	0.410690389	0.033306202
cg00022101	10	129079552	7.58E-05	0.0423615	0.240906035	16.24756093	0.303007526	0.490629781	B4	DOCK1	0.776471971	0.811183049	0.034711078
cg08009935	4	164403497	7.58E-05	0.0423615	0.277891557	16.24592605	0.303008588	0.4906315	B4	NA	0.161491924	0.20335877	0.041866846
cg12648819	1	3223607	7.58E-05	0.0423615	-0.191472139	16.24852682	0.303006899	0.490628765	B4	PRDM16	0.760002435	0.733510457	-0.026491977
cg12828354	5	149466715	7.58E-05	0.0423615	0.395091035	16.24620528	0.303008407	0.490631206	B4	CSF1R	0.559357131	0.581965582	0.022608451
cg14566567	5	148146611	7.58E-05	0.0423615	0.498320379	16.24603051	0.30300852	0.49063139	B4	NA	0.940220384	0.941689727	0.001469343
cg26436927	3	98484917	7.56E-05	0.0423615	0.227710929	16.25220798	0.303004508	0.490624893	B4	ST3GAL6	0.692915017	0.750616514	0.057701498
cg03133975	4	169226397	7.59E-05	0.042379075	-0.377600232	16.24357819	0.303010113	0.490633969	B4	DDX60	0.91333272	0.894592394	-0.018740326
cg14403690	3	167769502	7.63E-05	0.042531654	0.240517579	16.23477721	0.30301583	0.490643226	B4	GOLIM4	0.553165375	0.641104391	0.087939015
cg12449916	2	207847811	7.63E-05	0.042533229	0.430392754	16.23319875	0.303016855	0.490644886	B4	NA	0.385442725	0.435535651	0.050092926
cg08597808	5	10794201	7.64E-05	0.042551972	-0.199968807	16.2300994	0.303018869	0.490648147	B4	NA	0.940129242	0.927616149	-0.012513094
cg11277097	7	4754709	7.65E-05	0.042551972	0.749263985	16.22930115	0.303019387	0.490648986	B4	FOXK1	0.390253383	0.417047912	0.026794529
cg00650680	5	134728082	7.71E-05	0.042816353	0.588815564	16.21335657	0.303029746	0.490665758	B4	H2AFY	0.410210531	0.426491189	0.016280657
cg01179256	12	105141965	7.71E-05	0.042816353	0.451473014	16.21223132	0.303030477	0.490666942	B4	CHST11	0.624472865	0.62916367	0.004690805
cg01787553	8	134241398	7.71E-05	0.042816353	0.267706744	16.21239098	0.303030373	0.490666774	B4	WISP1	0.856936898	0.881783342	0.024846444
cg10995397	19	51971816	7.72E-05	0.042848414	0.433548129	16.20921554	0.303032436	0.490670115	B4	NA	0.752148343	0.769361719	0.017213376
cg09948345	2	134907228	7.74E-05	0.042924124	0.388270975	16.20413692	0.303035736	0.490675458	B4	NA	0.961070452	0.960886099	-0.000184354
cg27333146	X	56827695	7.76E-05	0.042987461	0.50324744	16.19965005	0.303038651	0.490680178	B4	LINC01420	0.605469006	0.618215478	0.012746473
cg03492094	9	91994786	7.78E-05	0.043073501	0.456451457	16.19409874	0.303042258	0.490686018	B4	SEMA4D	0.685249961	0.703066725	0.017816764
cg04043561	10	75753581	7.80E-05	0.04313313	0.348381512	16.18979921	0.303045052	0.490690542	B4	NA	0.852666647	0.872491716	0.01982507
cg22203678	9	114614258	7.86E-05	0.043423402	-0.496084841	16.17357731	0.303055593	0.49070761	B4	NA	0.416613514	0.428671985	0.012058471
cg23555322	4	86850378	7.86E-05	0.043423402	0.357721038	16.17320736	0.303055833	0.490708	B4	ARHGAP24	0.654209209	0.666029717	0.011820508
cg08051713	14	57311640	7.87E-05	0.043431106	0.237594933	16.16987184	0.303058001	0.490711509	B4	OTX2OS1	0.423489083	0.451709013	0.02821993
cg27430961	16	77246657	7.87E-05	0.043431106	0.533263632	16.17014929	0.303057821	0.490711217	B4	SYCE1L	0.02611916	0.02988452	0.00376536
cg08504765	8	37457295	7.88E-05	0.043443248	0.254249488	16.1678185	0.303059335	0.49071367	B4	NA	0.850342989	0.87126834	0.020925351
cg00233198	13	24844684	7.89E-05	0.043450971	-0.326496746	16.16597281	0.303060535	0.490715612	B4	SPATA13	0.138462364	0.123847703	-0.014614661
cg01093786	11	96047698	7.90E-05	0.04349496	-0.313336711	16.16243565	0.303062834	0.490719334	B4	MAML2	0.064793446	0.058961398	-0.005832048
cg18003662	14	95911016	7.91E-05	0.0434975	0.316668731	16.16083438	0.303063874	0.490721019	B4	SYNE3	0.852789973	0.859088402	0.006298429
cg19050418	12	83288336	7.92E-05	0.043525894	-0.292200569	16.15802859	0.303065698	0.490723972	B4	TMTC2	0.924824539	0.914674031	-0.010150508
cg16442638	2	120989893	7.93E-05	0.043571035	-0.338904449	16.1544448	0.303068027	0.490727743	B4	NA	0.101196134	0.088367362	-0.012828772
cg12439163	17	5165803	7.95E-05	0.043627866	0.384268229	16.15032058	0.303070707	0.490732084	B4	NA	0.450915572	0.477831502	0.026915931
cg10283505	11	94278912	7.96E-05	0.043663186	0.994038011	16.14720032	0.303072735	0.490735368	B4	FUT4	0.337021128	0.375724408	0.03870328
cg21602274	22	38637003	8.01E-05	0.043856745	-0.545089616	16.13527299	0.303080488	0.490747921	B4	TMEM184B	0.265055076	0.274722183	0.009667107
cg27235313	1	114692880	8.00E-05	0.043856745	0.694990311	16.13659808	0.303079627	0.490746526	B4	SYT6	0.588072666	0.580918746	-0.00715392
cg00653613	5	173311873	8.06E-05	0.044064701	-0.313348298	16.12272759	0.303088643	0.490761125	B4	NA	0.095906603	0.084388253	-0.01151835
cg13191951	15	71685353	8.05E-05	0.044064701	-0.301711293	16.12399035	0.303087822	0.490759796	B4	THSD4	0.830452504	0.810341145	-0.020111359
cg00092123	2	99415612	8.07E-05	0.044115923	0.420435152	16.11889828	0.303091132	0.490765156	B4	KIAA1211L	0.664551467	0.688459136	0.023907669
cg13727277	7	1062871	8.09E-05	0.04418253	-0.297694019	16.11436635	0.303094078	0.490769926	B4	MIR339;C7orf50	0.903730674	0.877957206	-0.025773468
cg11942235	18	55410491	8.13E-05	0.044327769	-0.49886714	16.10623895	0.303099362	0.490778482	B4	ATP8B1	0.948885321	0.935400445	-0.013484875
cg01257194	9	116161247	8.15E-05	0.044422841	0.441695135	16.09895594	0.303104097	0.490786149	B4	ALAD	0.359867334	0.402136217	0.042268882
cg19929355	4	48272059	8.15E-05	0.044422841	-0.358012992	16.1002769	0.303103238	0.490784758	B4	TEC	0.069814341	0.067235819	-0.002578522
cg12085119	13	110431691	8.16E-05	0.044444817	0.488357916	16.09648572	0.303105703	0.490788749	B4	IRS2	0.433637966	0.433480911	-0.000157055
cg08173709	3	71103443	8.17E-05	0.044452943	0.398082606	16.09430391	0.303107122	0.490791046	B4	FOXP1	0.55274619	0.593144972	0.040398782
cg15417244	12	41831558	8.18E-05	0.044452943	-0.098857645	16.09278828	0.303108107	0.490792642	B4	PDZRN4	0.847074564	0.800890472	-0.046184092
cg17317834	4	86647985	8.18E-05	0.044452943	0.234989312	16.09172017	0.303108802	0.490793766	B4	ARHGAP24	0.881175754	0.898553737	0.017377984
cg17813054	X	92924956	8.21E-05	0.044554678	-0.256392951	16.08415952	0.303113718	0.490801726	B4	NA	0.780152408	0.772585631	-0.007566776
cg18615457	14	45719962	8.21E-05	0.044554678	0.244153965	16.08542853	0.303112893	0.49080039	B4	C14orf106	0.863779748	0.881625923	0.017846176
cg18585629	14	51327525	8.27E-05	0.044787249	-0.417224672	16.07068135	0.303122482	0.490815917	B4	NA	0.090382765	0.100722724	0.010339959
cg23131421	15	71119538	8.27E-05	0.044787249	-0.350629637	16.07077517	0.303122421	0.490815818	B4	NA	0.849483996	0.841681372	-0.007802624
cg07709590	22	44529759	8.29E-05	0.044888355	0.093914299	16.06465047	0.303126404	0.490822267	B4	PARVB	0.388477085	0.482903678	0.094426593
cg04005840	21	16045883	8.34E-05	0.044996945	0.609146016	16.05318795	0.303133858	0.490834338	B4	NA	0.960511032	0.957543663	-0.002967369
cg05026674	20	39704724	8.32E-05	0.044996945	0.35126091	16.05795042	0.303130761	0.490829322	B4	TOP1	0.894549748	0.905648197	0.01109845
cg07064872	3	195161246	8.34E-05	0.044996945	0.300703763	16.05247575	0.303134321	0.490835088	B4	ACAP2	0.556277462	0.589889592	0.03361213
cg09468836	19	55889611	8.33E-05	0.044996945	-0.227800075	16.05631892	0.303131822	0.49083104	B4	TMEM190	0.932385343	0.913473187	-0.018912156
cg12173702	6	53482466	8.34E-05	0.044996945	0.249034588	16.05373305	0.303133504	0.490833763	B4	NA	0.859684141	0.887828773	0.028144632
cg07003360	20	42875708	8.36E-05	0.04503657	-0.251324877	16.04923912	0.303136426	0.490838496	B4	GDAP1L1	0.098004602	0.087909529	-0.010095074
cg13149147	2	105757726	8.41E-05	0.045292355	0.499311333	16.03630605	0.303144838	0.490852116	B4	NA	0.35927529	0.387643297	0.028368007
cg04888852	2	179387493	8.42E-05	0.045299751	0.221752543	16.03409598	0.303146276	0.490854444	B4	MIR548N;TTN-AS1	0.682833709	0.778166857	0.095333148
cg23707565	22	37309130	8.42E-05	0.045299751	0.402088659	16.03307676	0.303146938	0.490855517	B4	CSF2RB	0.90003991	0.903428834	0.003388924
cg19311890	15	90721869	8.45E-05	0.045413149	0.138114278	16.02656075	0.303151177	0.49086238	B4	NA	0.176020946	0.223584729	0.047563783
cg02577773	2	208027870	8.47E-05	0.045499227	0.268836439	16.02127557	0.303154615	0.490867946	B4	KLF7	0.509048492	0.554881253	0.045832761
cg21461811	10	30821806	8.48E-05	0.045529596	-0.380097827	16.01847765	0.303156435	0.490870893	B4	NA	0.596933259	0.592426278	-0.004506981
cg00742062	2	21022971	8.49E-05	0.045537477	-0.483667986	16.01668249	0.303157602	0.490872784	B4	LDAH	0.019057073	0.019712314	0.000655241
cg11963447	2	109674969	8.52E-05	0.045678064	-0.190450384	16.00899093	0.303162606	0.490880886	B4	NA	0.713684483	0.682917118	-0.030767365
cg08223428	2	74220649	8.56E-05	0.045821943	0.400291384	15.99994214	0.303168493	0.490890418	B4	TET3	0.879555632	0.88550554	0.005949908
cg11271990	7	65285831	8.57E-05	0.045821943	0.242327567	15.99832876	0.303169542	0.490892117	B4	NA	0.347605276	0.399352883	0.051747607
cg17600630	2	144053418	8.58E-05	0.045821943	0.238310852	15.99685435	0.303170502	0.49089367	B4	ARHGAP15	0.601645218	0.67945218	0.077806963
cg19749167	17	79304289	8.57E-05	0.045821943	0.555550111	15.99828729	0.303169569	0.490892161	B4	TMEM105	0.554347112	0.574617212	0.0202701
cg05236720	2	37893255	8.58E-05	0.045838965	-0.21701403	15.99466363	0.303171927	0.490895978	B4	CDC42EP3	0.513343175	0.487694935	-0.02564824
cg19897222	5	156975312	8.60E-05	0.045860617	0.453104603	15.99226966	0.303173484	0.4908985	B4	ADAM19	0.491933056	0.525330254	0.033397198
cg00660272	1	24231353	8.62E-05	0.045938251	-0.535404739	15.9859711	0.303177582	0.490905136	B4	CNR2	0.095511866	0.094559859	-0.000952007
cg22090713	3	50379032	8.62E-05	0.045938251	0.659950119	15.98709475	0.303176851	0.490903952	B4	RASSF1;ZMYND10	0.343077195	0.36611657	0.023039375
cg22059413	2	69831408	8.65E-05	0.046045814	0.256404849	15.97979773	0.303181599	0.490911639	B4	AAK1	0.906975596	0.914190702	0.007215106
cg15427587	9	120471783	8.66E-05	0.046051732	0.243749564	15.97810463	0.303182701	0.490913423	B4	TLR4	0.804459647	0.834498997	0.03003935
cg27440381	8	52809682	8.66E-05	0.046058508	0.29734808	15.97637483	0.303183826	0.490915246	B4	PCMTD1	0.54505624	0.622895975	0.077839734
cg03333153	3	127974426	8.67E-05	0.046084201	0.319149468	15.97381408	0.303185492	0.490917944	B4	EEFSEC	0.830931629	0.846481821	0.015550192
cg13755924_BO21	21	41420010	8.70E-05	0.046146836	-0.244239499	15.96696376	0.30318995	0.490925161	C0	MX1	0.683887828	0.654997173	-0.028890655
cg22510659	2	101039343	8.69E-05	0.046146836	0.325902499	15.96925622	0.303188458	0.490922746	B4	NA	0.864312982	0.886323402	0.02201042
cg25173739	5	176920516	8.70E-05	0.046146836	0.700149861	15.96677612	0.303190072	0.490925359	B4	PDLIM7	0.588103844	0.604203612	0.016099768
cg00865356	4	91048559	8.71E-05	0.046161807	0.200339793	15.96469234	0.303191428	0.490927555	B4	FAM190A	0.037060438	0.052199828	0.01513939
cg04389574	8	131364660	8.73E-05	0.046193941	0.443336431	15.96185684	0.303193273	0.490930542	B4	ASAP1	0.330177012	0.376986726	0.046809715
cg04459751	4	153499517	8.74E-05	0.046228695	0.35364711	15.9574851	0.303196118	0.490935149	B4	NA	0.808615769	0.824717481	0.016101713
cg18851887	3	122487700	8.74E-05	0.046228695	0.292196123	15.95782456	0.303195897	0.490934791	B4	HSPBAP1	0.426247485	0.526577981	0.100330496
cg16952026	6	106968674	8.76E-05	0.046267686	0.430647432	15.9531878	0.303198915	0.490939677	B4	AIM1	0.740655712	0.71822819	-0.022427522
cg21368479	6	149415018	8.76E-05	0.046267686	-0.233414951	15.95293311	0.30319908	0.490939945	B4	NA	0.865664578	0.849256975	-0.016407603
cg26696612	22	19333586	8.79E-05	0.046356709	0.355726348	15.94761808	0.303202539	0.490945546	B4	HIRA	0.925445647	0.934762893	0.009317246
cg14758757	17	79265454	8.80E-05	0.046391835	0.318463078	15.94466417	0.303204462	0.490948659	B4	SLC38A10	0.873355163	0.897794674	0.024439511
cg05323251	19	10449942	8.86E-05	0.046513231	0.581088477	15.9304501	0.303213713	0.490963638	B4	ICAM3	0.227650408	0.243182811	0.015532403
cg08791234	6	33267781	8.84E-05	0.046513231	0.338184007	15.93544232	0.303210464	0.490958377	B4	TAPBP;RGL2	0.022353468	0.028933374	0.006579905
cg14416559	18	21719381	8.84E-05	0.046513231	-0.210325898	15.93528809	0.303210564	0.490958539	B4	CABYR	0.030430938	0.023822852	-0.006608086
cg16905822	10	924646	8.87E-05	0.046513231	0.235651588	15.92946307	0.303214355	0.490964678	B4	LARP4B	0.862688346	0.88880651	0.026118164
cg17413460	12	96367302	8.86E-05	0.046513231	0.292233329	15.93058739	0.303213623	0.490963493	B4	HAL	0.897229702	0.906762241	0.009532539
cg19089201	7	45002287	8.87E-05	0.046513231	-0.124827212	15.92947863	0.303214345	0.490964662	B4	MYO1G	0.829683397	0.775649749	-0.054033648
cg24334029	20	58296208	8.85E-05	0.046513231	-0.306550363	15.93216038	0.3032126	0.490961836	B4	PHACTR3	0.529010108	0.518433084	-0.010577024
cg07827130	12	69747617	8.87E-05	0.046525169	0.535510917	15.92753196	0.303215612	0.490966713	B4	LYZ	0.937233357	0.934035293	-0.003198064
cg12507168	1	15551031	8.89E-05	0.046545414	-0.392509554	15.92499026	0.303217266	0.490969392	B4	NA	0.405420121	0.394988884	-0.010431236
cg19047119	5	59482823	8.89E-05	0.046545414	0.27448048	15.92383123	0.303218021	0.490970614	B4	PDE4D	0.815996602	0.850209733	0.034213132
cg18069911	14	64390073	8.92E-05	0.046643821	0.173878402	15.91814484	0.303221722	0.490976607	B4	SYNE2	0.620082256	0.664325813	0.044243557
cg00218742	8	142012213	8.93E-05	0.046682231	0.290771406	15.91507032	0.303223723	0.490979847	B4	PTK2	0.090387533	0.111262669	0.020875136
cg02946634	14	92856308	8.94E-05	0.04669165	0.458031691	15.91300083	0.303225071	0.490982029	B4	SLC24A4	0.824529147	0.827118493	0.002589346
cg19136487_BC21	13	108268519	8.95E-05	0.04669165	0.150931199	15.91115759	0.30322627	0.490983971	C0	TNFSF13B	0.561614013	0.655951127	0.094337115
cg24937298	12	92535892	8.95E-05	0.04669165	0.304001161	15.9104461	0.303226734	0.490984721	B4	C12orf79;BTG1	0.819899367	0.818774139	-0.001125229
cg13264822	7	137565290	8.98E-05	0.046824368	0.20305418	15.90329378	0.303231389	0.49099226	B4	CREB3L2	0.834445267	0.883499694	0.049054427
cg22253012	17	36192365	9.00E-05	0.046885576	0.336027788	15.89924583	0.303234025	0.490996527	B4	NA	0.900956439	0.903426684	0.002470245
cg07595134	19	2278708	9.01E-05	0.046895881	0.300187257	15.89739957	0.303235227	0.490998473	B4	C19orf35	0.966374603	0.967394648	0.001020046
cg17584633	4	1977976	9.09E-05	0.047270531	0.546482686	15.87988437	0.30324663	0.491016937	B4	WHSC1	0.962350162	0.961401269	-0.000948894
cg23744755	10	106096667	9.12E-05	0.047393761	0.295152942	15.87321314	0.303250973	0.49102397	B4	ITPRIP	0.274113942	0.279789904	0.005675962
cg01101380	1	36039173	9.14E-05	0.047466604	-0.211353702	15.86870522	0.303253908	0.491028723	B4	TFAP2E	0.286374972	0.246320959	-0.040054013
cg13289493	2	7016958	9.15E-05	0.047498	-0.478966887	15.86538442	0.303256071	0.491032224	B4	RSAD2	0.914675553	0.891191154	-0.023484399
cg23577001	19	340965	9.15E-05	0.047498	0.387651479	15.86457337	0.303256599	0.491033079	B4	MIER2	0.598266348	0.617064034	0.018797687
cg15939920	17	35457385	9.18E-05	0.047591153	0.507375595	15.85792823	0.303260926	0.491040085	B4	ACACA	0.303713521	0.34074167	0.037028148
cg16364066	10	6821184	9.18E-05	0.047591153	0.288329973	15.85781718	0.303260998	0.491040203	B4	NA	0.83008796	0.853382666	0.023294706
cg23321154	5	140997722	9.20E-05	0.047617006	-0.33102097	15.85532455	0.303262621	0.491042831	B4	DIAPH1	0.052926456	0.048241378	-0.004685079
cg03864128	20	32398023	9.21E-05	0.047644796	0.193656979	15.85136014	0.303265203	0.491047011	B4	CHMP4B	0.602106145	0.693676855	0.09157071
cg11099984	18	60864615	9.21E-05	0.047644796	0.329038474	15.85232946	0.303264572	0.491045989	B4	BCL2	0.554671272	0.579948403	0.025277131
cg05240712	2	241533389	9.26E-05	0.047805505	-0.372167585	15.84037527	0.303272357	0.491058594	B4	CAPN10	0.951631355	0.943093758	-0.008537597
cg06427395	12	44870441	9.26E-05	0.047805505	-0.283398677	15.84162502	0.303271543	0.491057276	B4	NA	0.806586213	0.785785681	-0.020800532
cg17428032	16	75835567	9.25E-05	0.047805505	0.283436252	15.8424667	0.303270995	0.491056389	B4	NA	0.575278337	0.572848282	-0.002430055
cg19951437	15	57753959	9.29E-05	0.047903255	0.203117623	15.83485288	0.303275953	0.491064417	B4	CGNL1	0.544395794	0.583335394	0.0389396
cg01834974	22	42818139	9.32E-05	0.047986384	0.370387435	15.82889163	0.303279835	0.491070704	B4	NFAM1	0.424186648	0.467957021	0.043770373
cg11912503	10	81030244	9.32E-05	0.047986384	0.445343671	15.82857166	0.303280044	0.491071041	B4	ZMIZ1	0.651363495	0.677058483	0.025694988
cg04145890	4	1007657	9.34E-05	0.048041793	-0.620897455	15.82485143	0.303282467	0.491074965	B4	FGFRL1	0.806922506	0.777774599	-0.029147907
cg02828078	22	40599692	9.35E-05	0.048059892	0.309896097	15.82179233	0.303284459	0.491078191	B4	TNRC6B	0.100770429	0.127651498	0.026881069
cg09975215	12	6880611	9.35E-05	0.048059892	-0.622148714	15.82132358	0.303284765	0.491078685	B4	LAG3	0.524957736	0.51969925	-0.005258486
cg08245053	11	2965555	9.37E-05	0.048117434	0.419817669	15.81752017	0.303287242	0.491082696	B4	NA	0.940924437	0.937842392	-0.003082045
cg00254017	5	56119093	9.38E-05	0.048124236	0.331701956	15.81585381	0.303288327	0.491084454	B4	MAP3K1	0.755770183	0.759009045	0.003238861
cg01962937	10	124221066	9.40E-05	0.048192274	0.379654427	15.81161481	0.303291088	0.491088925	B4	HTRA1	0.024608694	0.029211647	0.004602952
cg16995606	13	108920808	9.41E-05	0.048227202	0.183250739	15.80877004	0.303292941	0.491091925	B4	TNFSF13B	0.798693235	0.861950235	0.063257
cg00094412	6	29592854	9.43E-05	0.048307717	-0.332032626	15.80382588	0.303296162	0.49109714	B4	GABBR1	0.558416521	0.527668201	-0.030748321
cg04104358	11	12180973	9.44E-05	0.048307717	0.217927998	15.80264004	0.303296934	0.49109839	B4	MICAL2	0.561359469	0.62845701	0.067097541
cg01952989	7	1986334	9.45E-05	0.048342039	-0.114859285	15.7998271	0.303298767	0.491101357	B4	MAD1L1	0.582052995	0.539973022	-0.042079973
cg25477542	3	101561941	9.46E-05	0.048355844	0.265501464	15.79787474	0.303300039	0.491103417	B4	NFKBIZ	0.753814617	0.813094936	0.059280319
cg13915501	4	187426127	9.48E-05	0.048404442	-0.465418198	15.79446826	0.303302258	0.49110701	B4	NA	0.91400783	0.898524923	-0.015482907
cg26867393	8	30440319	9.52E-05	0.048578962	-0.171938181	15.7858122	0.303307897	0.491116141	B4	GTF2E2	0.825678201	0.814424915	-0.011253287
cg12131419	15	49353073	9.58E-05	0.048815557	0.196737738	15.77323837	0.303316089	0.491129405	B4	NA	0.892543911	0.908035214	0.015491303
cg13755924_BC21	21	41420010	9.58E-05	0.048815557	-0.235761744	15.77341217	0.303315975	0.491129222	C0	MX1	0.748955231	0.719492041	-0.02946319
cg09561353	9	131047932	9.62E-05	0.049024376	-0.288421821	15.76323152	0.303322609	0.491139962	B4	SWI5	0.922595899	0.906129219	-0.01646668
cg02311275	4	84277683	9.68E-05	0.049264083	0.288411601	15.75062656	0.303330822	0.491153261	B4	NA	0.706219866	0.747935515	0.041715649
cg15238481	17	79102908	9.68E-05	0.049264083	-0.377096738	15.7511618	0.303330473	0.491152696	B4	AATK	0.904606703	0.883147785	-0.021458917
cg05573654	5	1518179	9.70E-05	0.049298637	0.28086319	15.74731287	0.303332981	0.491156757	B4	LPCAT1	0.762877546	0.788673593	0.025796047
cg24934137	8	98869237	9.70E-05	0.049298637	-0.204748163	15.74647583	0.303333527	0.491157641	B4	NA	0.933662612	0.918802321	-0.014860292
cg13989196	9	20997763	9.78E-05	0.049633966	0.305596582	15.73139711	0.303343353	0.491173551	B4	NA	0.735739934	0.756105375	0.020365442
cg09854626	16	1030568	9.79E-05	0.049663383	0.167493598	15.72883493	0.303345023	0.491176255	B4	SOX8	0.024816251	0.037382453	0.012566201
cg23777479	13	101169917	9.81E-05	0.049716777	0.201315578	15.72529861	0.303347327	0.491179987	B4	PCCA	0.718661113	0.770989203	0.052328089
cg05257429	14	89936184	9.82E-05	0.049727009	0.350111044	15.72352064	0.303348486	0.491181863	B4	FOXN3	0.775289602	0.803865409	0.028575806
cg18595479	1	38939716	9.82E-05	0.049732702	0.518349459	15.7219283	0.303349524	0.491183544	B4	NA	0.952542178	0.95175702	-0.000785158
cg20406758	11	2703128	9.83E-05	0.049756078	0.473705134	15.71961791	0.30335103	0.491185982	B4	KCNQ1OT1;KCNQ1	0.907251236	0.907332156	8.09E-05
cg02081263	16	87048928	9.88E-05	0.049778055	-0.138992928	15.70989485	0.303357367	0.491196243	B4	NA	0.738570744	0.706504055	-0.03206669
cg05590818	2	171943243	9.86E-05	0.049778055	0.259242923	15.71382584	0.303354805	0.491192094	B4	TLK1	0.387781119	0.415927782	0.028146663
cg06195280	17	6658706	9.88E-05	0.049778055	-0.314781764	15.70923173	0.303357799	0.491196943	B4	XAF1	0.933286525	0.927712664	-0.005573861
cg07831198	19	39148414	9.88E-05	0.049778055	0.302287863	15.70923775	0.303357795	0.491196936	B4	ACTN4	0.626274897	0.65889484	0.032619944
cg08625808	3	50379923	9.88E-05	0.049778055	0.571463536	15.71081024	0.30335677	0.491195277	B4	ZMYND10	0.492364036	0.520837377	0.028473342
cg11432630	7	100224149	9.86E-05	0.049778055	-0.490762609	15.71428199	0.303354508	0.491191613	B4	TFR2	0.175550868	0.172758541	-0.002792327
cg24493060	7	104793890	9.85E-05	0.049778055	0.415638506	15.715842	0.303353491	0.491189967	B4	SRPK2	0.95747396	0.955542377	-0.001931584
cg01597112	12	46759825	9.92E-05	0.049852665	0.287220503	15.70124157	0.303363007	0.491205376	B4	SLC38A2	0.351441014	0.433805645	0.082364631
cg13652798	7	102084084	9.92E-05	0.049852665	-0.374682236	15.70259138	0.303362127	0.491203951	B4	ORAI2	0.280687989	0.298464178	0.017776189
cg14338521	11	3147867	9.93E-05	0.049852665	-0.536371412	15.70079827	0.303363296	0.491205844	B4	OSBPL5	0.315369997	0.337183684	0.021813687
cg16649629	11	74780823	9.92E-05	0.049852665	0.36685391	15.70182409	0.303362628	0.491204761	B4	NA	0.929510044	0.927894888	-0.001615156
cg02138358	17	56358318	9.94E-05	0.049885375	-0.70386908	15.69812295	0.30336504	0.491208667	B4	MPO	0.316272042	0.33633738	0.020065338
cg00830121	16	85904858	9.96E-05	0.049973916	-0.477569821	15.69318875	0.303368257	0.491213875	B4	NA	0.926313903	0.90478733	-0.021526572
