# Supplementary material for: Host methylation predicts SARS-CoV-2 infection and clinical outcome
Source: Research Square preprint supplement (doi:10.21203/rs.3.rs-334297/v1), 2021-03-22
Supplement: Supplementary file 2 [file 9d6ac469967d75b5fb8e10e7.csv]

Probe_ID	Chromosome	Coordinate	Gene_NCBI	Transcript_NCBI	Feature_NCBI	M	U	DESIGN	COLOR_CHANNEL.x	Strand	Multimapping	Included_in_Analysis
cg00012362_BC21	chr1	153599487	S100A13	NM_001024210.2	TSSBody	NA	55692905	II	Both	-	FALSE	TRUE
cg00014176_TC21	chr15	74315106	PML	NM_033246.2	TSSBody	NA	55725942	II	Both	+	FALSE	TRUE
cg00020172_BC21	chr6	31050373	NA	NA	NA	NA	40622876	II	Both	-	FALSE	TRUE
cg00028881_BC21	chr6	31632939	GPANK1	NM_001199237.1	TSSBody	NA	89700838	II	Both	-	FALSE	TRUE
cg00030918_TC21	chr1	152679697	NA	NA	NA	NA	6604553	II	Both	+	FALSE	TRUE
cg00031105_TC21	chr6	33166117	RXRB	NM_001291989.1	TSSBody	NA	33715168	II	Both	+	FALSE	TRUE
cg00034425_BC21	chr6	30864248	DDR1	NM_001297652.1	TSSBody	NA	1697338	II	Both	-	FALSE	TRUE
cg00034425_TC21	chr6	30864248	DDR1	NM_001297652.1	TSSBody	NA	92700448	II	Both	+	FALSE	TRUE
cg00040423_BC21	chr6	30293951	TRIM39	NM_001369522.1	TSS1500	NA	5711223	II	Both	-	FALSE	TRUE
cg00045190_TC21	chr6	33216612	HCG25	NR_044997.1	TSS1500	NA	76810305	II	Both	+	FALSE	TRUE
cg00065481_TC21	chr1	2485643	TNFRSF14-AS1	NR_037844.2	TSSBody	NA	90715537	II	Both	+	FALSE	TRUE
cg00065482_BC21	chr1	2485650	TNFRSF14-AS1	NR_037844.2	TSSBody	NA	41664595	II	Both	-	FALSE	TRUE
cg00065484_TC21	chr1	2485722	TNFRSF14-AS1	NR_037844.2	TSSBody	NA	98725428	II	Both	+	FALSE	TRUE
cg00065490_BC21	chr1	2485866	TNFRSF14-AS1	NR_037844.2	TSSBody	NA	10656253	II	Both	-	FALSE	TRUE
cg00065499_BC21	chr1	2488900	TNFRSF14	NM_001297605.1	TSSBody	NA	70776118	II	Both	-	FALSE	TRUE
cg00065499_TC21	chr1	2488900	TNFRSF14	NM_001297605.1	TSSBody	NA	55788222	II	Both	+	FALSE	TRUE
cg00065501_TC21	chr1	2488931	TNFRSF14	NM_001297605.1	TSSBody	NA	97763979	II	Both	+	FALSE	TRUE
cg00065502_TC21	chr1	2488944	TNFRSF14	NM_001297605.1	TSSBody	NA	37663122	II	Both	+	FALSE	TRUE
cg00065509_TC21	chr1	2489200	TNFRSF14	NM_001297605.1	TSSBody	NA	19764233	II	Both	+	FALSE	TRUE
cg00065510_BC21	chr1	2489214	TNFRSF14	NM_001297605.1	TSSBody	NA	80788853	II	Both	-	FALSE	TRUE
cg00065511_BC21	chr1	2489230	TNFRSF14	NM_001297605.1	TSSBody	NA	91710359	II	Both	-	FALSE	TRUE
cg00065512_BC21	chr1	2489248	TNFRSF14	NM_001297605.1	TSSBody	NA	61749124	II	Both	-	FALSE	TRUE
cg00065513_TC21	chr1	2486286	TNFRSF14-AS1	NR_037844.2	TSSBody	NA	68653534	II	Both	+	FALSE	TRUE
cg00065514_BC21	chr1	2486312	TNFRSF14	NM_001297605.1	TSS1500	NA	16804549	II	Both	-	FALSE	TRUE
cg00065514_TC21	chr1	2486312	TNFRSF14	NM_001297605.1	TSS1500	NA	66801836	II	Both	+	FALSE	TRUE
cg00065517_TC21	chr1	2486469	TNFRSF14	NM_001297605.1	TSS1500	NA	2769229	II	Both	+	FALSE	TRUE
cg00065518_TC21	chr1	2486560	TNFRSF14	NM_001297605.1	TSS1500	NA	31758939	II	Both	+	FALSE	TRUE
cg00065519_BC21	chr1	2486637	TNFRSF14	NM_001297605.1	TSS1500	NA	86759507	II	Both	-	FALSE	TRUE
cg00065520_BC21	chr1	2486682	TNFRSF14	NM_001297605.1	TSS1500	NA	26725889	II	Both	-	FALSE	TRUE
cg00065520_TC21	chr1	2486682	TNFRSF14	NM_001297605.1	TSS1500	NA	99746103	II	Both	+	FALSE	TRUE
cg00065521_BC21	chr1	2486687	TNFRSF14	NM_001297605.1	TSS1500	NA	25631929	II	Both	-	FALSE	TRUE
cg00065525_BC21	chr1	2486761	TNFRSF14	NM_001297605.1	TSS1500	NA	65644874	II	Both	-	FALSE	TRUE
cg00065526_BC21	chr1	2486804	TNFRSF14	NM_001297605.1	TSS1500	NA	94764256	II	Both	-	FALSE	TRUE
cg00065527_TC21	chr1	2486868	TNFRSF14	NM_001297605.1	TSS1500	NA	60805122	II	Both	+	FALSE	TRUE
cg00065532_BC21	chr1	2487105	TNFRSF14	NM_001297605.1	TSS1500	NA	88632561	II	Both	-	FALSE	TRUE
cg00065532_TC21	chr1	2487105	TNFRSF14	NM_001297605.1	TSS1500	NA	3617966	II	Both	+	FALSE	TRUE
cg00065533_BC21	chr1	2487143	TNFRSF14	NM_001297605.1	TSS1500	NA	60705186	II	Both	-	FALSE	TRUE
cg00065541_BC21	chr1	2487230	TNFRSF14	NM_001297605.1	TSS1500	NA	52704260	II	Both	-	FALSE	TRUE
cg00065542_TC21	chr1	2487262	TNFRSF14	NM_001297605.1	TSS1500	NA	6712928	II	Both	+	FALSE	TRUE
cg00065543_BC21	chr1	2487285	TNFRSF14	NM_001297605.1	TSS1500	NA	68711291	II	Both	-	FALSE	TRUE
cg00065546_BC21	chr1	2487414	TNFRSF14	NM_001297605.1	TSS1500	NA	34694822	II	Both	-	FALSE	TRUE
cg00065547_TC21	chr1	2487416	TNFRSF14	NM_001297605.1	TSS1500	NA	2688105	II	Both	+	FALSE	TRUE
cg00065550_TC21	chr1	2487505	TNFRSF14	NM_001297605.1	TSS1500	NA	8788391	II	Both	+	FALSE	TRUE
cg00065551_BC21	chr1	2487551	TNFRSF14	NM_001297605.1	TSS1500	NA	9632364	II	Both	-	FALSE	TRUE
cg00065551_TC21	chr1	2487551	TNFRSF14	NM_001297605.1	TSS1500	NA	49758542	II	Both	+	FALSE	TRUE
cg00065552_BC21	chr1	2487571	TNFRSF14	NM_001297605.1	TSS1500	NA	76766298	II	Both	-	FALSE	TRUE
cg00065552_TC21	chr1	2487571	TNFRSF14	NM_001297605.1	TSS1500	NA	17790949	II	Both	+	FALSE	TRUE
cg00065554_BC21	chr1	2487659	TNFRSF14	NM_001297605.1	TSS200	NA	87710594	II	Both	-	FALSE	TRUE
cg00065554_TO21	chr1	2487659	TNFRSF14	NM_001297605.1	TSS200	NA	64733231	II	Both	+	FALSE	TRUE
cg00065555_TC21	chr1	2487664	TNFRSF14	NM_001297605.1	TSS200	NA	9660822	II	Both	+	FALSE	TRUE
cg00065557_TC21	chr1	2487751	TNFRSF14	NM_001297605.1	TSS200	NA	97607897	II	Both	+	FALSE	TRUE
cg00065563_BC21	chr1	2487855	TNFRSF14	NM_001297605.1	TSSBody	NA	97756461	II	Both	-	FALSE	TRUE
cg00065571_BC21	chr1	2488025	TNFRSF14	NM_001297605.1	TSSBody	NA	58770234	II	Both	-	FALSE	TRUE
cg00065571_TO21	chr1	2488025	TNFRSF14	NM_001297605.1	TSSBody	NA	49784203	II	Both	+	FALSE	TRUE
cg00065572_TC21	chr1	2488079	TNFRSF14	NM_001297605.1	TSSBody	NA	43723110	II	Both	+	FALSE	TRUE
cg00065573_TC21	chr1	2488087	TNFRSF14	NM_001297605.1	TSSBody	NA	5793263	II	Both	+	FALSE	TRUE
cg00065584_TC21	chr1	2488313	TNFRSF14	NM_001297605.1	TSSBody	NA	79690855	II	Both	+	FALSE	TRUE
cg00065585_TC21	chr1	2488398	TNFRSF14	NM_001297605.1	TSSBody	NA	86607586	II	Both	+	FALSE	TRUE
cg00065586_BC21	chr1	2488421	TNFRSF14	NM_001297605.1	TSSBody	NA	5763238	II	Both	-	FALSE	TRUE
cg00065589_BC21	chr1	2488491	TNFRSF14	NM_001297605.1	TSSBody	NA	88723457	II	Both	-	FALSE	TRUE
cg00065590_BC21	chr1	2488501	TNFRSF14	NM_001297605.1	TSSBody	NA	41602223	II	Both	-	FALSE	TRUE
cg00065592_BC21	chr1	2488510	TNFRSF14	NM_001297605.1	TSSBody	NA	97772222	II	Both	-	FALSE	TRUE
cg00065592_TC21	chr1	2488510	TNFRSF14	NM_001297605.1	TSSBody	NA	68705111	II	Both	+	FALSE	TRUE
cg00065593_BC21	chr1	2488531	TNFRSF14	NM_001297605.1	TSSBody	NA	13605252	II	Both	-	FALSE	TRUE
cg00065596_TC21	chr1	2488702	TNFRSF14	NM_001297605.1	TSSBody	NA	90683258	II	Both	+	FALSE	TRUE
cg00065596_TO21	chr1	2488702	TNFRSF14	NM_001297605.1	TSSBody	NA	52810550	II	Both	+	FALSE	TRUE
cg00065597_BC21	chr1	2488720	TNFRSF14	NM_001297605.1	TSSBody	NA	98767131	II	Both	-	FALSE	TRUE
cg00065601_TC21	chr1	2488994	TNFRSF14	NM_001297605.1	TSSBody	NA	34752160	II	Both	+	FALSE	TRUE
cg00065603_TC21	chr1	2489032	TNFRSF14	NM_001297605.1	TSSBody	NA	72752205	II	Both	+	FALSE	TRUE
cg00065604_BC21	chr1	2489060	TNFRSF14	NM_001297605.1	TSSBody	NA	43709988	II	Both	-	FALSE	TRUE
cg00065609_BC21	chr1	2489534	TNFRSF14	NM_001297605.1	TSSBody	NA	93713335	II	Both	-	FALSE	TRUE
cg00065610_BC21	chr1	2489553	TNFRSF14	NM_001297605.1	TSSBody	NA	59612575	II	Both	-	FALSE	TRUE
cg00065610_TC21	chr1	2489553	TNFRSF14	NM_001297605.1	TSSBody	NA	3798879	II	Both	+	FALSE	TRUE
cg00065611_BC21	chr1	2489597	TNFRSF14	NM_001297605.1	TSSBody	NA	22664598	II	Both	-	FALSE	TRUE
cg00065611_TC21	chr1	2489597	TNFRSF14	NM_001297605.1	TSSBody	NA	22796206	II	Both	+	FALSE	TRUE
cg00065611_TO21	chr1	2489597	TNFRSF14	NM_001297605.1	TSSBody	NA	75669153	II	Both	+	FALSE	TRUE
cg00065612_BC21	chr1	2489647	TNFRSF14	NM_001297605.1	TSSBody	NA	76748462	II	Both	-	FALSE	TRUE
cg00065612_TC21	chr1	2489647	TNFRSF14	NM_001297605.1	TSSBody	NA	2810824	II	Both	+	FALSE	TRUE
cg00065612_TO21	chr1	2489647	TNFRSF14	NM_001297605.1	TSSBody	NA	52795907	II	Both	+	FALSE	TRUE
cg00065614_BC21	chr1	2489707	TNFRSF14	NM_001297605.1	TSSBody	NA	80796435	II	Both	-	FALSE	TRUE
cg00065615_TC21	chr1	2489709	TNFRSF14	NM_001297605.1	TSSBody	NA	2730465	II	Both	+	FALSE	TRUE
cg00065617_TC21	chr1	2489746	TNFRSF14	NM_001297605.1	TSSBody	NA	96730205	II	Both	+	FALSE	TRUE
cg00065620_BC21	chr1	2489787	TNFRSF14	NM_001297605.1	TSSBody	NA	86604870	II	Both	-	FALSE	TRUE
cg00065621_BC21	chr1	2489804	TNFRSF14	NM_001297605.1	TSSBody	NA	5776873	II	Both	-	FALSE	TRUE
cg00065621_TC21	chr1	2489804	TNFRSF14	NM_001297605.1	TSSBody	NA	63771820	II	Both	+	FALSE	TRUE
cg00065622_TC21	chr1	2489815	TNFRSF14	NM_001297605.1	TSSBody	NA	78650376	II	Both	+	FALSE	TRUE
cg00065623_BC21	chr1	2489926	TNFRSF14	NM_001297605.1	TSSBody	NA	67725298	II	Both	-	FALSE	TRUE
cg00065623_TO21	chr1	2489926	TNFRSF14	NM_001297605.1	TSSBody	NA	17607967	II	Both	+	FALSE	TRUE
cg00065624_BO21	chr1	2489938	TNFRSF14	NM_001297605.1	TSSBody	NA	45774951	II	Both	-	FALSE	TRUE
cg00065631_TC21	chr1	2490121	TNFRSF14	NM_001297605.1	TSSBody	NA	3654442	II	Both	+	FALSE	TRUE
cg00065632_TC21	chr1	2490147	TNFRSF14	NM_001297605.1	TSSBody	NA	69673266	II	Both	+	FALSE	TRUE
cg00065634_TC21	chr1	2490187	TNFRSF14	NM_001297605.1	TSSBody	NA	60742934	II	Both	+	FALSE	TRUE
cg00065635_TC21	chr1	2490219	TNFRSF14	NM_001297605.1	TSSBody	NA	78713215	II	Both	+	FALSE	TRUE
cg00065639_TC21	chr1	2490435	TNFRSF14	NM_001297605.1	TSSBody	NA	97771850	II	Both	+	FALSE	TRUE
cg00065640_BC21	chr1	2490452	TNFRSF14	NM_001297605.1	TSSBody	NA	75725836	II	Both	-	FALSE	TRUE
cg00065640_TO21	chr1	2490452	TNFRSF14	NM_001297605.1	TSSBody	NA	92668203	II	Both	+	FALSE	TRUE
cg00065641_BC21	chr1	2490459	TNFRSF14	NM_001297605.1	TSSBody	NA	46710266	II	Both	-	FALSE	TRUE
cg00065641_TC21	chr1	2490459	TNFRSF14	NM_001297605.1	TSSBody	NA	45776963	II	Both	+	FALSE	TRUE
cg00065642_BC21	chr1	2490513	TNFRSF14	NM_001297605.1	TSSBody	NA	33692177	II	Both	-	FALSE	TRUE
cg00065643_BC21	chr1	2490535	TNFRSF14	NM_001297605.1	TSSBody	NA	5681954	II	Both	-	FALSE	TRUE
cg00065646_BC21	chr1	2490898	TNFRSF14	NM_001297605.1	TSSBody	NA	41638957	II	Both	-	FALSE	TRUE
cg00065648_BC21	chr1	2490928	TNFRSF14	NM_001297605.1	TSSBody	NA	59697284	II	Both	-	FALSE	TRUE
cg00065649_TC21	chr1	2490942	TNFRSF14	NM_001297605.1	TSSBody	NA	89652552	II	Both	+	FALSE	TRUE
cg00065650_BC21	chr1	2490975	TNFRSF14	NM_001297605.1	TSSBody	NA	69746573	II	Both	-	FALSE	TRUE
cg00065650_TC21	chr1	2490975	TNFRSF14	NM_001297605.1	TSSBody	NA	76775551	II	Both	+	FALSE	TRUE
cg00065651_BC21	chr1	2490978	TNFRSF14	NM_001297605.1	TSSBody	NA	89717380	II	Both	-	FALSE	TRUE
cg00065651_TC21	chr1	2490978	TNFRSF14	NM_001297605.1	TSSBody	NA	89689448	II	Both	+	FALSE	TRUE
cg00065652_BC21	chr1	2491019	TNFRSF14	NM_001297605.1	TSSBody	NA	87746841	II	Both	-	FALSE	TRUE
cg00065658_BC21	chr1	2491163	TNFRSF14	NM_001297605.1	TSSBody	NA	15791962	II	Both	-	FALSE	TRUE
cg00065658_TC21	chr1	2491163	TNFRSF14	NM_001297605.1	TSSBody	NA	93654377	II	Both	+	FALSE	TRUE
cg00065658_TO21	chr1	2491163	TNFRSF14	NM_001297605.1	TSSBody	NA	79765902	II	Both	+	FALSE	TRUE
cg00065659_TC21	chr1	2491205	TNFRSF14	NM_001297605.1	TSSBody	NA	97761271	II	Both	+	FALSE	TRUE
cg00065660_BC21	chr1	2491219	TNFRSF14	NM_001297605.1	TSSBody	NA	61788946	II	Both	-	FALSE	TRUE
cg00065661_TC21	chr1	2491228	TNFRSF14	NM_001297605.1	TSSBody	NA	99799578	II	Both	+	FALSE	TRUE
cg00065665_BC21	chr1	2491282	TNFRSF14	NM_001297605.1	TSSBody	NA	47744125	II	Both	-	FALSE	TRUE
cg00065667_BC21	chr1	2491308	TNFRSF14	NM_001297605.1	TSSBody	NA	28618284	II	Both	-	FALSE	TRUE
cg00065668_BC21	chr1	2491341	TNFRSF14	NM_001297605.1	TSSBody	NA	9682308	II	Both	-	FALSE	TRUE
cg00065670_BC21	chr1	2491362	TNFRSF14	NM_001297605.1	TSSBody	NA	73737121	II	Both	-	FALSE	TRUE
cg00065679_BC21	chr1	2491472	TNFRSF14	NM_001297605.1	TSSBody	NA	84800158	II	Both	-	FALSE	TRUE
cg00065680_TC21	chr1	2491497	TNFRSF14	NM_001297605.1	TSSBody	NA	5799899	II	Both	+	FALSE	TRUE
cg00065686_BC21	chr1	2491807	TNFRSF14	NM_001297605.1	TSSBody	NA	87618434	II	Both	-	FALSE	TRUE
cg00065686_TC21	chr1	2491807	TNFRSF14	NM_001297605.1	TSSBody	NA	21680930	II	Both	+	FALSE	TRUE
cg00065687_BC21	chr1	2491842	TNFRSF14	NM_001297605.1	TSSBody	NA	9777954	II	Both	-	FALSE	TRUE
cg00065689_BC21	chr1	2491939	TNFRSF14	NM_001297605.1	TSSBody	NA	79762858	II	Both	-	FALSE	TRUE
cg00065690_BC21	chr1	2491958	TNFRSF14	NM_001297605.1	TSSBody	NA	14738114	II	Both	-	FALSE	TRUE
cg00065691_BC21	chr1	2492004	TNFRSF14	NM_001297605.1	TSSBody	NA	90623940	II	Both	-	FALSE	TRUE
cg00065691_TO21	chr1	2492004	TNFRSF14	NM_001297605.1	TSSBody	NA	81780319	II	Both	+	FALSE	TRUE
cg00065693_BC21	chr1	2492067	TNFRSF14	NM_001297605.1	TSSBody	NA	81728552	II	Both	-	FALSE	TRUE
cg00065695_BC21	chr1	2492165	TNFRSF14	NM_001297605.1	TSSBody	NA	3768199	II	Both	-	FALSE	TRUE
cg00065696_TC21	chr1	2492205	TNFRSF14	NM_001297605.1	TSSBody	NA	90801833	II	Both	+	FALSE	TRUE
cg00065697_BC21	chr1	2492227	TNFRSF14	NM_001297605.1	TSSBody	NA	85610868	II	Both	-	FALSE	TRUE
cg00065697_TC21	chr1	2492227	TNFRSF14	NM_001297605.1	TSSBody	NA	68706175	II	Both	+	FALSE	TRUE
cg00065698_BC21	chr1	2492267	TNFRSF14	NM_001297605.1	TSSBody	NA	73802211	II	Both	-	FALSE	TRUE
cg00065699_BC21	chr1	2492289	TNFRSF14	NM_001297605.1	TSSBody	NA	75723274	II	Both	-	FALSE	TRUE
cg00065699_BO21	chr1	2492289	TNFRSF14	NM_001297605.1	TSSBody	NA	26693284	II	Both	-	FALSE	TRUE
cg00065699_TC21	chr1	2492289	TNFRSF14	NM_001297605.1	TSSBody	NA	66613863	II	Both	+	FALSE	TRUE
cg00065700_TC21	chr1	2492540	TNFRSF14	NM_001297605.1	TSSBody	NA	78642176	II	Both	+	FALSE	TRUE
cg00065701_TC21	chr1	2492625	TNFRSF14	NM_001297605.1	TSSBody	NA	68713959	II	Both	+	FALSE	TRUE
cg00065708_BC21	chr1	2492934	TNFRSF14	NM_001297605.1	TSSBody	NA	67697889	II	Both	-	FALSE	TRUE
cg00065710_TC21	chr1	2493089	TNFRSF14	NM_001297605.1	TSSBody	NA	39805151	II	Both	+	FALSE	TRUE
cg00065713_BC21	chr1	2493129	TNFRSF14	NM_001297605.1	TSSBody	NA	89630829	II	Both	-	FALSE	TRUE
cg00065714_BC21	chr1	2493136	TNFRSF14	NM_001297605.1	TSSBody	NA	5776435	II	Both	-	FALSE	TRUE
cg00065715_TC21	chr1	2493190	TNFRSF14	NM_001297605.1	TSSBody	NA	93776355	II	Both	+	FALSE	TRUE
cg00070944_TC21	chr17	41162751	IFI35	NM_001330230.2	TSSBody	NA	8725264	II	Both	+	FALSE	TRUE
cg00079638_BC21	chr15	45003652	B2M	NM_004048.3	TSS200	NA	87796454	II	Both	-	FALSE	TRUE
cg00082491_BC21	chr6	31633028	GPANK1	NM_001199237.1	TSSBody	NA	9794571	II	Both	-	FALSE	TRUE
cg00089464_BC21	chr6	29717223	HLA-F-AS1	NR_026972.1	TSS1500	NA	8757821	II	Both	-	FALSE	TRUE
cg00119197_BC21	chr4	103422974	NFKB1	NM_001165412.2	TSSBody	NA	95793470	II	Both	-	FALSE	TRUE
cg00137065_TC1	chr2	25763719	DTNB	NM_001256304.2	TSSBody	3604542	96704129	I	Red	+	TRUE	TRUE
cg00137216_BC1	chr1	213323801	RPS6KC1	NM_001349665.1	TSSBody	5773483	69675951	I	Red	-	TRUE	TRUE
cg00137218_BC1	chr9	6798493	KDM4C	NM_001146696.2	TSSBody	87604113	44697832	I	Grn	-	TRUE	TRUE
cg00141143_BO21	chr6	31587821	PRRC2A	NM_080686.3	TSS1500	NA	22775154	II	Both	-	FALSE	TRUE
cg00141143_TC21	chr6	31587821	PRRC2A	NM_080686.3	TSS1500	NA	76713935	II	Both	+	FALSE	TRUE
cg00143020_BO21	chr14	24647176	REC8	NM_005132.3	TSSBody	NA	31603915	II	Both	-	FALSE	TRUE
cg00143020_TC21	chr14	24647176	REC8	NM_005132.3	TSSBody	NA	26749189	II	Both	+	FALSE	TRUE
cg00143020_TO21	chr14	24647176	REC8	NM_005132.3	TSSBody	NA	84693302	II	Both	+	FALSE	TRUE
cg00151089_TC21	chr6	29624824	MOG	NM_206814.6	TSS200	NA	43798992	II	Both	+	FALSE	TRUE
cg00175161_TC1	chr5	88032138	MEF2C	NM_001364330.2	TSSBody	95780382	9796365	I	Red	+	TRUE	TRUE
cg00180097_BC21	chr6	31601157	PRRC2A	NM_080686.3	TSSBody	NA	76764174	II	Both	-	FALSE	TRUE
cg00188321_BC21	chr6	33358615	KIFC1	NM_002263.4	TSS1500	NA	35643567	II	Both	-	FALSE	TRUE
cg00188321_TC21	chr6	33358615	KIFC1	NM_002263.4	TSS1500	NA	73637238	II	Both	+	FALSE	TRUE
cg00195218_BC21	chr19	45504516	RELB	NM_006509.4	TSS1500	NA	55680181	II	Both	-	FALSE	TRUE
cg00204743_TC21	chr6	30848726	NA	NA	NA	NA	8760991	II	Both	+	FALSE	TRUE
cg00210470_BC21	chr6	31581498	NA	NA	NA	NA	66806552	II	Both	-	FALSE	TRUE
cg00211738_BC21	chr6	33217075	HCG25	NR_044997.1	TSS1500	NA	62784956	II	Both	-	FALSE	TRUE
cg00226265_TC21	chr6	32134490	EGFL8	NM_030652.4	TSSBody	NA	20789877	II	Both	+	FALSE	TRUE
cg00232453_BC21	chr6	31864574	EHMT2	NM_006709.5	TSSBody	NA	60716902	II	Both	-	FALSE	TRUE
cg00232453_TC21	chr6	31864574	EHMT2	NM_006709.5	TSSBody	NA	2697909	II	Both	+	FALSE	TRUE
cg00242098_TC21	chr1	152730718	KPRP	NM_001025231.2	TSSBody	NA	75664972	II	Both	+	FALSE	TRUE
cg00244776_BC21	chr6	30883192	VARS2	NM_001167733.2	TSSBody	NA	26798599	II	Both	-	FALSE	TRUE
cg00255853_BC21	chr6	33176439	RING1	NM_002931.4	TSSBody	NA	10683208	II	Both	-	FALSE	TRUE
cg00267325_TC1	chr6	29691936	HLA-F	NM_018950.2	TSSBody	60806954	2764553	I	Grn	+	FALSE	TRUE
cg00267325_TC21	chr6	29691936	HLA-F	NM_018950.2	TSSBody	NA	81693933	II	Both	+	FALSE	TRUE
cg00280174_BC21	chr6	31845469	SLC44A4	NM_001178044.1	TSSBody	NA	71719897	II	Both	-	FALSE	TRUE
cg00280174_BO21	chr6	31845469	SLC44A4	NM_001178044.1	TSSBody	NA	63792229	II	Both	-	FALSE	TRUE
cg00280174_TC21	chr6	31845469	SLC44A4	NM_001178044.1	TSSBody	NA	16785855	II	Both	+	FALSE	TRUE
cg00290174_TC21	chr1	152177682	NA	NA	NA	NA	67689835	II	Both	+	FALSE	TRUE
cg00290174_TO21	chr1	152177682	NA	NA	NA	NA	70797828	II	Both	+	FALSE	TRUE
cg00293330_TC21	chr1	152572678	LCE3C	NM_178434.3	TSS200	NA	96803108	II	Both	+	FALSE	TRUE
cg00293330_TO21	chr1	152572678	LCE3C	NM_178434.3	TSS200	NA	43767886	II	Both	+	FALSE	TRUE
cg00298977_TC21	chr1	153175842	LELP1	NM_001010857.3	TSS200	NA	58630223	II	Both	+	FALSE	TRUE
cg00300233_BC21	chr1	153610800	CHTOP	NM_001244664.1	TSSBody	NA	62652135	II	Both	-	FALSE	TRUE
cg00304288_BC21	chr6	30294170	HCG18	NR_102327.1	TSSBody	NA	98750156	II	Both	-	FALSE	TRUE
cg00305797_BC21	chr4	186989236	TLR3	NM_003265.2	TSS1500	NA	3750363	II	Both	-	FALSE	TRUE
cg00305797_BO21	chr4	186989236	TLR3	NM_003265.2	TSS1500	NA	10770559	II	Both	-	FALSE	TRUE
cg00305797_TC21	chr4	186989236	TLR3	NM_003265.2	TSS1500	NA	84616115	II	Both	+	FALSE	TRUE
cg00346247_BC21	chr6	29716851	HLA-F-AS1	NR_026972.1	TSS200	NA	87627175	II	Both	-	FALSE	TRUE
cg00369658_BC21	chr11	57365088	SERPING1	NM_001032295.2	TSS1500	NA	51776172	II	Both	-	FALSE	TRUE
cg00378282_TC21	chr9	5124481	JAK2	NM_001322195.1	TSSBody	NA	41810581	II	Both	+	FALSE	TRUE
cg00399895_BC21	chr22	39472177	APOBEC3G	NM_001349436.1	TSS1500	NA	9745317	II	Both	-	FALSE	TRUE
cg00406188_TC21	chr1	152647216	LCE2C	NM_178429.3	TSS1500	NA	32700992	II	Both	+	FALSE	TRUE
cg00420808_TC21	chr6	33216383	HCG25	NR_044997.1	TSS1500	NA	97672879	II	Both	+	FALSE	TRUE
cg00433866_BC21	chr6	29623646	MOG	NM_206814.6	TSS1500	NA	38630841	II	Both	-	FALSE	TRUE
cg00433866_TC21	chr6	29623646	MOG	NM_206814.6	TSS1500	NA	45639158	II	Both	+	FALSE	TRUE
cg00448525_BC21	chr1	247581408	NLRP3	NM_001079821.2	TSSBody	NA	35766525	II	Both	-	FALSE	TRUE
cg00448525_BO21	chr1	247581408	NLRP3	NM_001079821.2	TSSBody	NA	6641322	II	Both	-	FALSE	TRUE
cg00456894_TC21	chr16	3096092	MMP25	NM_022468.5	TSS1500	NA	3743254	II	Both	+	FALSE	TRUE
cg00466425_BC21	chr6	30856491	DDR1	NM_001297652.1	TSSBody	NA	76654430	II	Both	-	FALSE	TRUE
cg00479451_BC21	chr6	33216368	HCG25	NR_044997.1	TSS1500	NA	26706955	II	Both	-	FALSE	TRUE
cg00482994_BC21	chr6	32945234	BRD2	NM_005104.4	TSSBody	NA	19611972	II	Both	-	FALSE	TRUE
cg00482994_TC21	chr6	32945234	BRD2	NM_005104.4	TSSBody	NA	76789848	II	Both	+	FALSE	TRUE
cg00491616_TC21	chr6	33379287	PHF1	NM_002636.5	TSSBody	NA	99669527	II	Both	+	FALSE	TRUE
cg00504902_TC21	chr6	29692183	HLA-F	NM_018950.2	TSSBody	NA	60777103	II	Both	+	FALSE	TRUE
cg00510758_TC1	chr7	107896777	NRCAM	NM_001193582.1	TSSBody	42697822	97723362	I	Red	+	TRUE	TRUE
cg00526791_BC21	chr6	30034717	PPP1R11	NM_021959.3	TSS1500	NA	55647105	II	Both	-	FALSE	TRUE
cg00526791_TC21	chr6	30034717	PPP1R11	NM_021959.3	TSS1500	NA	68771211	II	Both	+	FALSE	TRUE
cg00526791_TO21	chr6	30034717	PPP1R11	NM_021959.3	TSS1500	NA	49714260	II	Both	+	FALSE	TRUE
cg00533183_BC21	chr6	32810742	PSMB8-AS1	NR_037176.1	TSS1500	NA	91624111	II	Both	-	FALSE	TRUE
cg00533183_BO21	chr6	32810742	PSMB8-AS1	NR_037176.1	TSS1500	NA	94797961	II	Both	-	FALSE	TRUE
cg00533183_TC21	chr6	32810742	PSMB8-AS1	NR_037176.1	TSS1500	NA	61657267	II	Both	+	FALSE	TRUE
cg00533183_TO21	chr6	32810742	PSMB8-AS1	NR_037176.1	TSS1500	NA	7698240	II	Both	+	FALSE	TRUE
cg00546438_TC1	chr7	107896930	NRCAM	NM_001193582.1	TSSBody	86692946	67718970	I	Red	+	TRUE	TRUE
cg00550442_BC1	chr9	6807519	KDM4C	NM_001146696.2	TSSBody	26795566	81649595	I	Grn	-	TRUE	TRUE
cg00552704_BC21	chr6	32121420	LOC100507547	NR_037169.1	TSSBody	NA	46617113	II	Both	-	FALSE	TRUE
cg00563045_BO21	chr6	30878494	GTF2H4	NM_001517.5	TSSBody	NA	89809217	II	Both	-	FALSE	TRUE
cg00563045_TC21	chr6	30878494	GTF2H4	NM_001517.5	TSSBody	NA	68775953	II	Both	+	FALSE	TRUE
cg00588517_BC21	chr6	31895464	C2	NM_001282459.2	TSS200	NA	56699974	II	Both	-	FALSE	TRUE
cg00599401_TC21	chr6	30538989	ABCF1	NM_001090.3	TSS1500	NA	75775902	II	Both	+	FALSE	TRUE
cg00614280_BO1	chr6	31474903	MICB	NM_001289160.1	TSSBody	37793914	21630296	I	Grn	-	TRUE	TRUE
cg00614280_BO21	chr6	31474903	MICB	NM_001289160.1	TSSBody	NA	5803914	II	Both	-	TRUE	TRUE
cg00614280_TC1	chr6	31474903	MICB	NM_001289160.1	TSSBody	64753943	13755549	I	Red	+	FALSE	TRUE
cg00614280_TC21	chr6	31474903	MICB	NM_001289160.1	TSSBody	NA	43645541	II	Both	+	FALSE	TRUE
cg00624949_BC21	chr6	32134620	EGFL8	NM_030652.4	TSSBody	NA	50687157	II	Both	-	FALSE	TRUE
cg00629289_BC21	chr6	31461728	MICB-DT	NR_149132.1	TSSBody	NA	76602405	II	Both	-	FALSE	TRUE
cg00633793_TC1	chr1	40335723	TRIT1	NM_017646.6	TSSBody	88716239	26809130	I	Red	+	TRUE	TRUE
cg00640087_BC21	chr6	31707202	MSH5	NM_172165.3	TSS1500	NA	8671927	II	Both	-	FALSE	TRUE
cg00640087_BO21	chr6	31707202	MSH5	NM_172165.3	TSS1500	NA	64600240	II	Both	-	FALSE	TRUE
cg00640087_TC21	chr6	31707202	MSH5	NM_172165.3	TSS1500	NA	50654548	II	Both	+	FALSE	TRUE
cg00649377_BC21	chr6	30881728	VARS2	NM_001167733.2	TSS1500	NA	36744582	II	Both	-	FALSE	TRUE
cg00678158_TC21	chr6	30538836	ABCF1	NM_001090.3	TSS1500	NA	81717373	II	Both	+	FALSE	TRUE
cg00699337_TC21	chr12	12223296	BCL2L14	NM_138723.2	TSS1500	NA	71716915	II	Both	+	FALSE	TRUE
cg00716752_TC21	chr6	31588308	PRRC2A	NM_080686.3	TSS200	NA	75710254	II	Both	+	FALSE	TRUE
cg00720829_BC21	chr6	30131219	TRIM15	NM_033229.3	TSS200	NA	40765257	II	Both	-	FALSE	TRUE
cg00720829_BO21	chr6	30131219	TRIM15	NM_033229.3	TSS200	NA	82659825	II	Both	-	FALSE	TRUE
cg00741582_BC21	chr9	139802433	TRAF2	NM_021138.4	TSSBody	NA	95640293	II	Both	-	FALSE	TRUE
cg00766535_TC21	chr6	30717858	NA	NA	NA	NA	44770977	II	Both	+	FALSE	TRUE
cg00773370_TC21	chr12	6483772	SCNN1A	NM_001159575.1	TSSBody	NA	8803189	II	Both	+	FALSE	TRUE
cg00777968_BC21	chr6	32811647	PSMB8-AS1	NR_037176.1	TSS1500	NA	75779469	II	Both	-	FALSE	TRUE
cg00781298_BC21	chr9	4985156	JAK2	NM_001322199.1	TSS200	NA	79789541	II	Both	-	FALSE	TRUE
cg00795626_BC21	chr6	31632915	GPANK1	NM_001199237.1	TSSBody	NA	38704820	II	Both	-	FALSE	TRUE
cg00795626_TC21	chr6	31632915	GPANK1	NM_001199237.1	TSSBody	NA	9653318	II	Both	+	FALSE	TRUE
cg00805874_TC21	chr6	31867847	C2	NM_001282457.2	TSSBody	NA	15744211	II	Both	+	FALSE	TRUE
cg00824743_BC1	chr3	17359432	TBC1D5	NM_001349076.1	TSSBody	85697366	94791233	I	Red	-	TRUE	TRUE
cg00837838_BC21	chr15	45003774	B2M	NM_004048.3	TSSBody	NA	2678980	II	Both	-	FALSE	TRUE
cg00843339_BC21	chr6	31367527	MICA	NM_001289154.2	TSS1500	NA	41681294	II	Both	-	FALSE	TRUE
cg00868747_BC21	chr6	33216392	HCG25	NR_044997.1	TSS1500	NA	76780571	II	Both	-	FALSE	TRUE
cg00868747_TC21	chr6	33216392	HCG25	NR_044997.1	TSS1500	NA	40717125	II	Both	+	FALSE	TRUE
cg00872651_BC21	chr15	44038639	CATSPER2P1	NR_002318.2	TSS200	NA	3629267	II	Both	-	FALSE	TRUE
cg00879843_BC21	chr6	33239764	VPS52	NM_001289174.2	TSS200	NA	3734175	II	Both	-	FALSE	TRUE
cg00879843_TC21	chr6	33239764	VPS52	NM_001289174.2	TSS200	NA	53732987	II	Both	+	FALSE	TRUE
cg00881185_BC21	chr16	57023398	NLRC5	NM_001330552.2	TSS200	NA	78713461	II	Both	-	FALSE	TRUE
cg00887255_BC21	chr6	31600560	PRRC2A	NM_080686.3	TSSBody	NA	75725166	II	Both	-	FALSE	TRUE
cg00888420_TC1	chr8	85223258	RALYL	NM_001354325.1	TSSBody	26609175	59783821	I	Red	+	TRUE	TRUE
cg00929964_BC21	chr6	30879921	GTF2H4	NM_001517.5	TSSBody	NA	49701906	II	Both	-	FALSE	TRUE
cg00933603_TC21	chr6	30883001	VARS2	NM_001167733.2	TSSBody	NA	82754542	II	Both	+	FALSE	TRUE
cg00934322_TC21	chr6	30854109	DDR1	NM_001297652.1	TSSBody	NA	99647508	II	Both	+	FALSE	TRUE
cg00956573_BC21	chr6	32940570	BRD2	NM_005104.4	TSSBody	NA	3603103	II	Both	-	FALSE	TRUE
cg00969472_BC21	chr1	79084332	NA	NA	NA	NA	47754253	II	Both	-	FALSE	TRUE
cg00969472_TC21	chr1	79084332	NA	NA	NA	NA	82697154	II	Both	+	FALSE	TRUE
cg00969476_BC21	chr1	79084876	IFI44L	NM_006820.4	TSS1500	NA	9684449	II	Both	-	FALSE	TRUE
cg00969476_TC21	chr1	79084876	IFI44L	NM_006820.4	TSS1500	NA	8698431	II	Both	+	FALSE	TRUE
cg00969478_BC21	chr1	79085222	IFI44L	NM_006820.4	TSS1500	NA	43704182	II	Both	-	FALSE	TRUE
cg00969478_TO21	chr1	79085222	IFI44L	NM_006820.4	TSS1500	NA	65659185	II	Both	+	FALSE	TRUE
cg00969480_BO21	chr1	79085647	IFI44L	NM_006820.4	TSS1500	NA	4612584	II	Both	-	FALSE	TRUE
cg00969480_TC21	chr1	79085647	IFI44L	NM_006820.4	TSS1500	NA	61810284	II	Both	+	FALSE	TRUE
cg00969508_TC21	chr1	79090199	IFI44L	NM_006820.4	TSSBody	NA	20792941	II	Both	+	FALSE	TRUE
cg00969511_BC21	chr1	79090600	IFI44L	NM_006820.4	TSSBody	NA	60619534	II	Both	-	FALSE	TRUE
cg00969513_BC21	chr1	79091137	IFI44L	NM_006820.4	TSSBody	NA	89688332	II	Both	-	FALSE	TRUE
cg00969515_BC21	chr1	79092804	IFI44L	NM_006820.4	TSSBody	NA	1701109	II	Both	-	FALSE	TRUE
cg00969515_BO21	chr1	79092804	IFI44L	NM_006820.4	TSSBody	NA	78618361	II	Both	-	FALSE	TRUE
cg00969516_BC21	chr1	79093096	IFI44L	NM_006820.4	TSSBody	NA	51780194	II	Both	-	FALSE	TRUE
cg00969516_TC21	chr1	79093096	IFI44L	NM_006820.4	TSSBody	NA	76653232	II	Both	+	FALSE	TRUE
cg00969518_TC21	chr1	79093943	IFI44L	NM_006820.4	TSSBody	NA	52773284	II	Both	+	FALSE	TRUE
cg00969520_BC21	chr1	79093956	IFI44L	NM_006820.4	TSSBody	NA	96803126	II	Both	-	FALSE	TRUE
cg00969520_TC21	chr1	79093956	IFI44L	NM_006820.4	TSSBody	NA	34805279	II	Both	+	FALSE	TRUE
cg00969522_BC21	chr1	79094042	IFI44L	NM_006820.4	TSSBody	NA	70776166	II	Both	-	FALSE	TRUE
cg00969523_TC21	chr1	79094069	IFI44L	NM_006820.4	TSSBody	NA	26632841	II	Both	+	FALSE	TRUE
cg00969523_TO21	chr1	79094069	IFI44L	NM_006820.4	TSSBody	NA	53765214	II	Both	+	FALSE	TRUE
cg00969524_BC21	chr1	79094133	IFI44L	NM_006820.4	TSSBody	NA	61657169	II	Both	-	FALSE	TRUE
cg00969526_BC21	chr1	79094260	IFI44L	NM_006820.4	TSSBody	NA	58757129	II	Both	-	FALSE	TRUE
cg00969526_BO21	chr1	79094260	IFI44L	NM_006820.4	TSSBody	NA	1741981	II	Both	-	FALSE	TRUE
cg00969547_TC21	chr1	79101624	IFI44L	NM_006820.4	TSSBody	NA	8778868	II	Both	+	FALSE	TRUE
cg00969675_BC21	chr1	79124637	IFI44	NR_135640.1	TSSBody	NA	75740334	II	Both	-	FALSE	TRUE
cg00969675_BO21	chr1	79124637	IFI44	NR_135640.1	TSSBody	NA	77773938	II	Both	-	FALSE	TRUE
cg00969688_TC21	chr1	79127269	IFI44	NR_135640.1	TSSBody	NA	47788250	II	Both	+	FALSE	TRUE
cg00969690_TC21	chr1	79127438	IFI44	NR_135640.1	TSSBody	NA	99622183	II	Both	+	FALSE	TRUE
cg00969690_TO21	chr1	79127438	IFI44	NR_135640.1	TSSBody	NA	97684283	II	Both	+	FALSE	TRUE
cg00969692_BC21	chr1	79127970	IFI44	NR_135640.1	TSSBody	NA	99636121	II	Both	-	FALSE	TRUE
cg00978846_BO21	chr6	32605043	HLA-DQA1	NM_002122.5	TSS200	NA	6795583	II	Both	-	FALSE	TRUE
cg00978846_TC21	chr6	32605043	HLA-DQA1	NM_002122.5	TSS200	NA	34642234	II	Both	+	FALSE	TRUE
cg00978846_TO21	chr6	32605043	HLA-DQA1	NM_002122.5	TSS200	NA	92730939	II	Both	+	FALSE	TRUE
cg00981443_TC21	chr1	152681163	LCE4A	NM_178356.3	TSS1500	NA	82778353	II	Both	+	FALSE	TRUE
cg00987176_BC21	chr10	104154298	NFKB2	NM_002502.6	TSS1500	NA	55643125	II	Both	-	FALSE	TRUE
cg01016122_BO21	chr6	31082534	PSORS1C1	NM_014068.3	TSS200	NA	74760895	II	Both	-	FALSE	TRUE
cg01016122_TC21	chr6	31082534	PSORS1C1	NM_014068.3	TSS200	NA	72772952	II	Both	+	FALSE	TRUE
cg01016326_BC21	chr6	31727279	MSH5	NM_172165.3	TSSBody	NA	4663274	II	Both	-	FALSE	TRUE
cg01036205_TC21	chr4	186989523	TLR3	NM_003265.2	TSS1500	NA	65746570	II	Both	+	FALSE	TRUE
cg01044849_BC21	chr6	30002723	ZNRD1ASP	NR_026751.2	TSSBody	NA	55618181	II	Both	-	FALSE	TRUE
cg01044849_BO21	chr6	30002723	ZNRD1ASP	NR_026751.2	TSSBody	NA	15618843	II	Both	-	FALSE	TRUE
cg01044849_TC21	chr6	30002723	ZNRD1ASP	NR_026751.2	TSSBody	NA	45780861	II	Both	+	FALSE	TRUE
cg01089930_BC21	chr12	64890764	TBK1	NM_013254.4	TSSBody	NA	55792233	II	Both	-	FALSE	TRUE
cg01089930_TC21	chr12	64890764	TBK1	NM_013254.4	TSSBody	NA	38672147	II	Both	+	FALSE	TRUE
cg01105356_BC21	chr16	11016097	CIITA	NM_000246.3	TSSBody	NA	61675275	II	Both	-	FALSE	TRUE
cg01119809_BC1	chr1	100323115	AGL	NM_000642.3	TSSBody	21639238	76784383	I	Red	-	TRUE	TRUE
cg01119810_TC1	chr1	100323131	AGL	NM_000642.3	TSSBody	15717848	97713544	I	Red	+	TRUE	TRUE
cg01131076_TC21	chr6	32940655	BRD2	NM_005104.4	TSSBody	NA	42696910	II	Both	+	FALSE	TRUE
cg01137708_BC21	chr4	103423368	NFKB1	NM_001165412.2	TSSBody	NA	60675847	II	Both	-	FALSE	TRUE
cg01143314_BC21	chr6	31916711	CFB	NM_001710.6	TSSBody	NA	31772927	II	Both	-	FALSE	TRUE
cg01143314_TC21	chr6	31916711	CFB	NM_001710.6	TSSBody	NA	17691977	II	Both	+	FALSE	TRUE
cg01157525_TC21	chr6	33409399	SYNGAP1	NM_001130066.2	TSSBody	NA	59743182	II	Both	+	FALSE	TRUE
cg01170201_BC21	chr6	32820976	TAP1	NM_000593.5	TSSBody	NA	16611107	II	Both	-	FALSE	TRUE
cg01170201_TC21	chr6	32820976	TAP1	NM_000593.5	TSSBody	NA	9701117	II	Both	+	FALSE	TRUE
cg01175610_BC21	chr12	12224246	BCL2L14	NM_001370268.1	TSSBody	NA	93725540	II	Both	-	FALSE	TRUE
cg01190484_BC21	chr6	30104593	TRIM40	NM_001286633.2	TSSBody	NA	3772543	II	Both	-	FALSE	TRUE
cg01217601_BC21	chr6	30686747	TUBB	NM_001293214.2	TSS1500	NA	5637386	II	Both	-	FALSE	TRUE
cg01231860_TC1	chr1	115022642	TRIM33	NM_015906.4	TSSBody	19792881	21665239	I	Red	+	TRUE	TRUE
cg01234945_TC21	chr6	33398923	SYNGAP1	NM_001130066.2	TSSBody	NA	99603462	II	Both	+	FALSE	TRUE
cg01240052_BC1	chr15	44062468	PDIA3	NM_005313.5	TSSBody	66760153	10730171	I	Red	-	FALSE	TRUE
cg01240052_BC21	chr15	44062468	PDIA3	NM_005313.5	TSSBody	NA	10668221	II	Both	-	FALSE	TRUE
cg01240052_BC22	chr15	44062468	PDIA3	NM_005313.5	TSSBody	NA	47749946	II	Both	-	FALSE	TRUE
cg01240052_TC21	chr15	44062468	PDIA3	NM_005313.5	TSSBody	NA	4704166	II	Both	+	TRUE	TRUE
cg01241018_BC21	chr6	33176386	RING1	NM_002931.4	TSSBody	NA	75722850	II	Both	-	FALSE	TRUE
cg01249653_BC1	chr6	33095755	HLA-DPB2	NR_001435.2	TSSBody	76684294	95776820	I	Red	-	FALSE	TRUE
cg01282751_BC21	chr6	31600734	PRRC2A	NM_080686.3	TSSBody	NA	62625242	II	Both	-	FALSE	TRUE
cg01283917_BC21	chr6	33386256	CUTA	NM_015921.3	TSS1500	NA	38740226	II	Both	-	FALSE	TRUE
cg01293250_BC21	chr6	33239762	VPS52	NM_001289174.2	TSS200	NA	66723160	II	Both	-	FALSE	TRUE
cg01293250_TC21	chr6	33239762	VPS52	NM_001289174.2	TSS200	NA	5600527	II	Both	+	FALSE	TRUE
cg01305327_TC21	chr6	31371170	MICA	NM_001289154.2	TSSBody	NA	98773187	II	Both	+	FALSE	TRUE
cg01309328_BC21	chr6	32811253	PSMB8-AS1	NR_037176.1	TSS1500	NA	88683974	II	Both	-	FALSE	TRUE
cg01309328_BO21	chr6	32811253	PSMB8-AS1	NR_037176.1	TSS1500	NA	43633237	II	Both	-	FALSE	TRUE
cg01320573_BC21	chr6	33387003	CUTA	NM_015921.3	TSS1500	NA	58773218	II	Both	-	FALSE	TRUE
cg01340312_BC21	chr6	30687511	TUBB	NM_001293214.2	TSS1500	NA	12759906	II	Both	-	FALSE	TRUE
cg01340312_TC21	chr6	30687511	TUBB	NM_001293214.2	TSS1500	NA	89804176	II	Both	+	FALSE	TRUE
cg01347250_TC21	chr1	153600152	S100A13	NM_001024210.2	TSSBody	NA	72604523	II	Both	+	FALSE	TRUE
cg01391445_TC21	chr9	120465374	TLR4	NM_138557.3	TSS1500	NA	91723503	II	Both	+	FALSE	TRUE
cg01393792_BC21	chr6	32936540	BRD2	NM_005104.4	TSSBody	NA	20664526	II	Both	-	FALSE	TRUE
cg01405582_TC21	chr6	29692365	HLA-F	NM_018950.2	TSSBody	NA	86601390	II	Both	+	FALSE	TRUE
cg01414772_BC21	chr4	187002764	TLR3	NM_003265.2	TSSBody	NA	58675191	II	Both	-	FALSE	TRUE
cg01414772_TC21	chr4	187002764	TLR3	NM_003265.2	TSSBody	NA	74735834	II	Both	+	FALSE	TRUE
cg01417267_TC1	chr1	151976070	NA	NA	NA	67783590	88656350	I	Grn	+	TRUE	TRUE
cg01417267_TC21	chr1	151976070	NA	NA	NA	NA	9661195	II	Both	+	TRUE	TRUE
cg01417267_TO1	chr1	151976070	NA	NA	NA	12663295	6691859	I	Grn	+	FALSE	TRUE
cg01417267_TO21	chr1	151976070	NA	NA	NA	NA	46720886	II	Both	+	FALSE	TRUE
cg01417375_TC21	chr1	151989691	NBPF18P	NR_103561.1	TSS1500	NA	9788441	II	Both	+	FALSE	TRUE
cg01417377_TC21	chr1	151989836	NBPF18P	NR_103561.1	TSS1500	NA	5611440	II	Both	+	FALSE	TRUE
cg01417378_TC21	chr1	151990092	NBPF18P	NR_103561.1	TSS1500	NA	98743276	II	Both	+	FALSE	TRUE
cg01417379_TC21	chr1	151990103	NBPF18P	NR_103561.1	TSS1500	NA	90704567	II	Both	+	FALSE	TRUE
cg01417380_BC21	chr1	151990486	NBPF18P	NR_103561.1	TSS1500	NA	44632189	II	Both	-	FALSE	TRUE
cg01417381_BO21	chr1	151990729	NBPF18P	NR_103561.1	TSS200	NA	23711197	II	Both	-	FALSE	TRUE
cg01417381_TC21	chr1	151990729	NBPF18P	NR_103561.1	TSS200	NA	40783885	II	Both	+	FALSE	TRUE
cg01417383_TC21	chr1	151990756	NBPF18P	NR_103561.1	TSSBody	NA	78692303	II	Both	+	FALSE	TRUE
cg01417387_TC21	chr1	151990955	NBPF18P	NR_103561.1	TSSBody	NA	51708114	II	Both	+	FALSE	TRUE
cg01417932_BC21	chr1	152049481	NA	NA	NA	NA	60796932	II	Both	-	FALSE	TRUE
cg01417934_TC21	chr1	152049487	NA	NA	NA	NA	55697523	II	Both	+	FALSE	TRUE
cg01417942_BC21	chr1	152049791	NA	NA	NA	NA	53766887	II	Both	-	FALSE	TRUE
cg01417943_BC21	chr1	152049826	NA	NA	NA	NA	96642858	II	Both	-	FALSE	TRUE
cg01417943_TC21	chr1	152049826	NA	NA	NA	NA	5618148	II	Both	+	FALSE	TRUE
cg01417944_TC21	chr1	152049930	NA	NA	NA	NA	99665311	II	Both	+	FALSE	TRUE
cg01417945_BO21	chr1	152050017	NA	NA	NA	NA	26809568	II	Both	-	FALSE	TRUE
cg01417945_TC21	chr1	152050017	NA	NA	NA	NA	93688255	II	Both	+	FALSE	TRUE
cg01417948_TC21	chr1	152050289	NA	NA	NA	NA	98689383	II	Both	+	FALSE	TRUE
cg01418848_TC21	chr1	152139192	NA	NA	NA	NA	7734476	II	Both	+	FALSE	TRUE
cg01418849_TC21	chr1	152139659	NA	NA	NA	NA	75713451	II	Both	+	FALSE	TRUE
cg01418849_TO21	chr1	152139659	NA	NA	NA	NA	69641833	II	Both	+	FALSE	TRUE
cg01418966_BC21	chr1	152161078	NA	NA	NA	NA	99626239	II	Both	-	FALSE	TRUE
cg01418968_BC21	chr1	152161234	NA	NA	NA	NA	11725169	II	Both	-	FALSE	TRUE
cg01418969_BC21	chr1	152161252	NA	NA	NA	NA	57640858	II	Both	-	FALSE	TRUE
cg01418970_BC21	chr1	152161284	NA	NA	NA	NA	72706288	II	Both	-	FALSE	TRUE
cg01418971_BC21	chr1	152161322	NA	NA	NA	NA	90785295	II	Both	-	FALSE	TRUE
cg01418972_TC21	chr1	152161326	NA	NA	NA	NA	48604249	II	Both	+	FALSE	TRUE
cg01418973_TC21	chr1	152161339	NA	NA	NA	NA	2776298	II	Both	+	FALSE	TRUE
cg01418975_BC21	chr1	152161382	NA	NA	NA	NA	75770550	II	Both	-	FALSE	TRUE
cg01418977_BC21	chr1	152161438	NA	NA	NA	NA	86771488	II	Both	-	FALSE	TRUE
cg01418979_BC21	chr1	152161453	NA	NA	NA	NA	9790341	II	Both	-	FALSE	TRUE
cg01418979_TC21	chr1	152161453	NA	NA	NA	NA	50633183	II	Both	+	FALSE	TRUE
cg01418982_BC21	chr1	152161508	NA	NA	NA	NA	59782573	II	Both	-	FALSE	TRUE
cg01418982_TC21	chr1	152161508	NA	NA	NA	NA	90751883	II	Both	+	FALSE	TRUE
cg01418983_BC21	chr1	152161512	NA	NA	NA	NA	90738315	II	Both	-	FALSE	TRUE
cg01418983_TC21	chr1	152161512	NA	NA	NA	NA	46731879	II	Both	+	FALSE	TRUE
cg01418984_BC21	chr1	152161514	NA	NA	NA	NA	26671896	II	Both	-	FALSE	TRUE
cg01418984_TC21	chr1	152161514	NA	NA	NA	NA	32600966	II	Both	+	FALSE	TRUE
cg01418986_BC21	chr1	152161598	NA	NA	NA	NA	71732526	II	Both	-	FALSE	TRUE
cg01418990_BC21	chr1	152161643	NA	NA	NA	NA	72675213	II	Both	-	FALSE	TRUE
cg01418993_TC21	chr1	152161665	NA	NA	NA	NA	67772970	II	Both	+	FALSE	TRUE
cg01418994_BC21	chr1	152161674	NA	NA	NA	NA	87643553	II	Both	-	FALSE	TRUE
cg01418995_TC21	chr1	152161707	NA	NA	NA	NA	31748586	II	Both	+	FALSE	TRUE
cg01418996_TC21	chr1	152161732	NA	NA	NA	NA	70766113	II	Both	+	FALSE	TRUE
cg01418997_BC21	chr1	152161735	NA	NA	NA	NA	8635147	II	Both	-	FALSE	TRUE
cg01418998_TC21	chr1	152161737	NA	NA	NA	NA	80646178	II	Both	+	FALSE	TRUE
cg01419002_TC21	chr1	152161793	NA	NA	NA	NA	80784136	II	Both	+	FALSE	TRUE
cg01419003_TC21	chr1	152161795	NA	NA	NA	NA	62659115	II	Both	+	FALSE	TRUE
cg01419235_TC21	chr1	152186837	HRNR	NM_001009931.2	TSSBody	NA	76637948	II	Both	+	TRUE	TRUE
cg01419378_BC1	chr1	152192465	HRNR	NM_001009931.2	TSSBody	76609447	51618569	I	Red	-	FALSE	TRUE
cg01419378_BC21	chr1	152192465	HRNR	NM_001009931.2	TSSBody	NA	60727538	II	Both	-	FALSE	TRUE
cg01419500_BC21	chr1	152220049	NA	NA	NA	NA	86695836	II	Both	-	FALSE	TRUE
cg01419500_TC21	chr1	152220049	NA	NA	NA	NA	90757495	II	Both	+	FALSE	TRUE
cg01419501_BC21	chr1	152220280	NA	NA	NA	NA	75800441	II	Both	-	FALSE	TRUE
cg01419502_BC21	chr1	152220352	NA	NA	NA	NA	81632970	II	Both	-	FALSE	TRUE
cg01419502_TC21	chr1	152220352	NA	NA	NA	NA	59788199	II	Both	+	FALSE	TRUE
cg01419503_BO21	chr1	152220360	NA	NA	NA	NA	39792842	II	Both	-	FALSE	TRUE
cg01419503_TC21	chr1	152220360	NA	NA	NA	NA	87686989	II	Both	+	FALSE	TRUE
cg01420007_BC1	chr1	152280073	FLG	NM_002016.2	TSSBody	4616489	75616108	I	Red	-	TRUE	TRUE
cg01420007_BC21	chr1	152280073	FLG	NM_002016.2	TSSBody	NA	87742335	II	Both	-	TRUE	TRUE
cg01420052_TC1	chr1	152282020	FLG	NM_002016.2	TSSBody	26632557	45682258	I	Red	+	FALSE	TRUE
cg01420052_TC21	chr1	152282020	FLG	NM_002016.2	TSSBody	NA	26794231	II	Both	+	FALSE	TRUE
cg01420131_BC21	chr1	152285027	FLG	NM_002016.2	TSSBody	NA	3767365	II	Both	-	FALSE	TRUE
cg01420136_BC21	chr1	152285314	FLG	NM_002016.2	TSSBody	NA	60603970	II	Both	-	FALSE	TRUE
cg01420145_TC21	chr1	152285838	FLG	NM_002016.2	TSSBody	NA	90620900	II	Both	+	FALSE	TRUE
cg01420148_BC21	chr1	152285906	FLG	NM_002016.2	TSSBody	NA	26782573	II	Both	-	FALSE	TRUE
cg01420213_BC21	chr1	152306652	FLG-AS1	NR_103778.1	TSSBody	NA	75753933	II	Both	-	FALSE	TRUE
cg01420225_TC21	chr1	152308971	FLG-AS1	NR_103778.1	TSSBody	NA	6712930	II	Both	+	FALSE	TRUE
cg01420225_TO21	chr1	152308971	FLG-AS1	NR_103778.1	TSSBody	NA	56745542	II	Both	+	FALSE	TRUE
cg01420226_TC21	chr1	152308974	FLG-AS1	NR_103778.1	TSSBody	NA	9616867	II	Both	+	FALSE	TRUE
cg01420334_BC21	chr1	152336644	FLG-AS1	NR_103778.1	TSSBody	NA	84787150	II	Both	-	FALSE	TRUE
cg01420334_BO21	chr1	152336644	FLG-AS1	NR_103778.1	TSSBody	NA	85667305	II	Both	-	FALSE	TRUE
cg01420334_TC21	chr1	152336644	FLG-AS1	NR_103778.1	TSSBody	NA	49640577	II	Both	+	FALSE	TRUE
cg01420335_BC21	chr1	152336675	FLG-AS1	NR_103778.1	TSSBody	NA	95743545	II	Both	-	FALSE	TRUE
cg01420335_BO21	chr1	152336675	FLG-AS1	NR_103778.1	TSSBody	NA	89617422	II	Both	-	FALSE	TRUE
cg01420335_TO21	chr1	152336675	FLG-AS1	NR_103778.1	TSSBody	NA	79628385	II	Both	+	FALSE	TRUE
cg01420336_BC21	chr1	152336821	FLG-AS1	NR_103778.1	TSSBody	NA	78760355	II	Both	-	FALSE	TRUE
cg01420336_TC21	chr1	152336821	FLG-AS1	NR_103778.1	TSSBody	NA	91704154	II	Both	+	FALSE	TRUE
cg01420337_TC21	chr1	152336978	FLG-AS1	NR_103778.1	TSSBody	NA	8603824	II	Both	+	FALSE	TRUE
cg01420339_BC21	chr1	152337873	FLG-AS1	NR_103778.1	TSSBody	NA	80601872	II	Both	-	FALSE	TRUE
cg01420339_TC21	chr1	152337873	FLG-AS1	NR_103778.1	TSSBody	NA	87719978	II	Both	+	FALSE	TRUE
cg01420370_BC21	chr1	152345711	NA	NA	NA	NA	75653531	II	Both	-	FALSE	TRUE
cg01420370_TO21	chr1	152345711	NA	NA	NA	NA	77756927	II	Both	+	FALSE	TRUE
cg01420519_TC21	chr1	152370754	NA	NA	NA	NA	11632145	II	Both	+	FALSE	TRUE
cg01420520_BC21	chr1	152370986	NA	NA	NA	NA	30675154	II	Both	-	FALSE	TRUE
cg01420523_BC21	chr1	152371153	NA	NA	NA	NA	9758851	II	Both	-	FALSE	TRUE
cg01420523_BO21	chr1	152371153	NA	NA	NA	NA	84644324	II	Both	-	FALSE	TRUE
cg01420523_TO21	chr1	152371153	NA	NA	NA	NA	88774591	II	Both	+	FALSE	TRUE
cg01420527_TC21	chr1	152371974	NA	NA	NA	NA	53757175	II	Both	+	FALSE	TRUE
cg01420529_TC21	chr1	152372016	NA	NA	NA	NA	34675854	II	Both	+	FALSE	TRUE
cg01420530_BC21	chr1	152372039	NA	NA	NA	NA	74660223	II	Both	-	FALSE	TRUE
cg01420530_TC21	chr1	152372039	NA	NA	NA	NA	50653533	II	Both	+	FALSE	TRUE
cg01422224_BC21	chr1	152627680	LINC00302	NR_145430.1	TSS1500	NA	34711165	II	Both	-	FALSE	TRUE
cg01422224_BO21	chr1	152627680	LINC00302	NR_145430.1	TSS1500	NA	32805220	II	Both	-	FALSE	TRUE
cg01422224_TC21	chr1	152627680	LINC00302	NR_145430.1	TSS1500	NA	5632141	II	Both	+	FALSE	TRUE
cg01422225_TC21	chr1	152627728	LINC00302	NR_145430.1	TSS1500	NA	75700266	II	Both	+	FALSE	TRUE
cg01422226_BC21	chr1	152627887	LINC00302	NR_145430.1	TSS200	NA	44798239	II	Both	-	FALSE	TRUE
cg01422320_TC21	chr1	152646279	NA	NA	NA	NA	41747880	II	Both	+	FALSE	TRUE
cg01422322_BC21	chr1	152647239	LCE2C	NM_178429.3	TSS1500	NA	61763879	II	Both	-	FALSE	TRUE
cg01422511_TC21	chr1	152680857	LCE4A	NM_178356.3	TSS1500	NA	87689195	II	Both	+	FALSE	TRUE
cg01422512_BC21	chr1	152680869	LCE4A	NM_178356.3	TSS1500	NA	5749281	II	Both	-	FALSE	TRUE
cg01422670_BC21	chr1	152708668	NA	NA	NA	NA	75772438	II	Both	-	FALSE	TRUE
cg01422671_TC21	chr1	152708938	NA	NA	NA	NA	76687438	II	Both	+	FALSE	TRUE
cg01422672_BC21	chr1	152708965	NA	NA	NA	NA	75767184	II	Both	-	FALSE	TRUE
cg01422695_BC21	chr1	152716255	NA	NA	NA	NA	59743158	II	Both	-	FALSE	TRUE
cg01422695_TC21	chr1	152716255	NA	NA	NA	NA	67752141	II	Both	+	FALSE	TRUE
cg01422774_BC21	chr1	152730646	KPRP	NM_001025231.2	TSSBody	NA	81787175	II	Both	-	FALSE	TRUE
cg01422775_TC21	chr1	152730960	KPRP	NM_001025231.2	TSSBody	NA	24784898	II	Both	+	FALSE	TRUE
cg01422775_TO21	chr1	152730960	KPRP	NM_001025231.2	TSSBody	NA	80600321	II	Both	+	FALSE	TRUE
cg01422776_BC21	chr1	152731030	KPRP	NM_001025231.2	TSSBody	NA	76780849	II	Both	-	FALSE	TRUE
cg01422776_TC21	chr1	152731030	KPRP	NM_001025231.2	TSSBody	NA	64607133	II	Both	+	FALSE	TRUE
cg01422777_BC21	chr1	152731051	KPRP	NM_001025231.2	TSSBody	NA	41657892	II	Both	-	FALSE	TRUE
cg01422777_TC21	chr1	152731051	KPRP	NM_001025231.2	TSSBody	NA	14771885	II	Both	+	FALSE	TRUE
cg01422778_TC21	chr1	152731142	KPRP	NM_001025231.2	TSSBody	NA	93771952	II	Both	+	FALSE	TRUE
cg01422779_BO21	chr1	152731170	KPRP	NM_001025231.2	TSSBody	NA	27761140	II	Both	-	FALSE	TRUE
cg01422779_TC21	chr1	152731170	KPRP	NM_001025231.2	TSSBody	NA	22750543	II	Both	+	FALSE	TRUE
cg01422779_TO21	chr1	152731170	KPRP	NM_001025231.2	TSSBody	NA	45761558	II	Both	+	FALSE	TRUE
cg01422781_BC21	chr1	152731523	KPRP	NM_001025231.2	TSSBody	NA	97763497	II	Both	-	FALSE	TRUE
cg01422783_BC21	chr1	152731900	KPRP	NM_001025231.2	TSSBody	NA	42789988	II	Both	-	FALSE	TRUE
cg01422783_BO21	chr1	152731900	KPRP	NM_001025231.2	TSSBody	NA	77754967	II	Both	-	FALSE	TRUE
cg01422971_TC21	chr1	152757440	LCE1E	NM_178353.2	TSS1500	NA	61748165	II	Both	+	FALSE	TRUE
cg01422973_BC21	chr1	152757689	LCE1E	NM_178353.2	TSS1500	NA	51660143	II	Both	-	FALSE	TRUE
cg01422973_TC21	chr1	152757689	LCE1E	NM_178353.2	TSS1500	NA	51741928	II	Both	+	FALSE	TRUE
cg01422974_BC21	chr1	152757741	LCE1E	NM_178353.2	TSS1500	NA	4637159	II	Both	-	FALSE	TRUE
cg01422974_BO21	chr1	152757741	LCE1E	NM_178353.2	TSS1500	NA	64695837	II	Both	-	FALSE	TRUE
cg01422975_TC21	chr1	152758467	LCE1E	NM_178353.2	TSS1500	NA	43740176	II	Both	+	FALSE	TRUE
cg01422976_BC21	chr1	152759119	LCE1E	NM_178353.2	TSSBody	NA	46784953	II	Both	-	FALSE	TRUE
cg01422976_TC21	chr1	152759119	LCE1E	NM_178353.2	TSSBody	NA	91725856	II	Both	+	FALSE	TRUE
cg01423011_BC21	chr1	152767755	LCE1D	NM_178352.3	TSS1500	NA	26760868	II	Both	-	FALSE	TRUE
cg01423012_BC21	chr1	152768147	LCE1D	NM_178352.3	TSS1500	NA	76652445	II	Both	-	FALSE	TRUE
cg01423013_BC21	chr1	152768707	LCE1D	NM_178352.3	TSS1500	NA	3700424	II	Both	-	FALSE	TRUE
cg01423013_BO21	chr1	152768707	LCE1D	NM_178352.3	TSS1500	NA	73733596	II	Both	-	FALSE	TRUE
cg01423014_BC21	chr1	152768866	LCE1D	NM_178352.3	TSS1500	NA	27730253	II	Both	-	FALSE	TRUE
cg01423014_TC21	chr1	152768866	LCE1D	NM_178352.3	TSS1500	NA	13609839	II	Both	+	FALSE	TRUE
cg01423015_BC21	chr1	152768883	LCE1D	NM_178352.3	TSS1500	NA	27675246	II	Both	-	FALSE	TRUE
cg01423015_TO21	chr1	152768883	LCE1D	NM_178352.3	TSS1500	NA	3807206	II	Both	+	FALSE	TRUE
cg01423016_TO21	chr1	152769000	LCE1D	NM_178352.3	TSS200	NA	82612309	II	Both	+	FALSE	TRUE
cg01423339_BC21	chr1	152831110	NA	NA	NA	NA	61769531	II	Both	-	FALSE	TRUE
cg01423339_TC21	chr1	152831110	NA	NA	NA	NA	94683355	II	Both	+	FALSE	TRUE
cg01423340_BC21	chr1	152831339	NA	NA	NA	NA	99712832	II	Both	-	FALSE	TRUE
cg01423341_TC21	chr1	152831484	NA	NA	NA	NA	92642992	II	Both	+	FALSE	TRUE
cg01423342_BC21	chr1	152831941	NA	NA	NA	NA	48653903	II	Both	-	FALSE	TRUE
cg01423342_TC21	chr1	152831941	NA	NA	NA	NA	23699180	II	Both	+	FALSE	TRUE
cg01423343_BC21	chr1	152831965	NA	NA	NA	NA	60705166	II	Both	-	FALSE	TRUE
cg01423343_TC21	chr1	152831965	NA	NA	NA	NA	81701988	II	Both	+	FALSE	TRUE
cg01423344_BC21	chr1	152832116	NA	NA	NA	NA	90674870	II	Both	-	FALSE	TRUE
cg01423344_TC21	chr1	152832116	NA	NA	NA	NA	9633590	II	Both	+	FALSE	TRUE
cg01423344_TO21	chr1	152832116	NA	NA	NA	NA	48699247	II	Both	+	FALSE	TRUE
cg01423345_BC21	chr1	152832452	NA	NA	NA	NA	46723104	II	Both	-	FALSE	TRUE
cg01423345_TC21	chr1	152832452	NA	NA	NA	NA	20722894	II	Both	+	FALSE	TRUE
cg01423345_TO21	chr1	152832452	NA	NA	NA	NA	69671193	II	Both	+	FALSE	TRUE
cg01423637_TC21	chr1	152879591	IVL	NM_005547.3	TSS1500	NA	89731279	II	Both	+	FALSE	TRUE
cg01423638_TC21	chr1	152879691	IVL	NM_005547.3	TSS1500	NA	79608905	II	Both	+	FALSE	TRUE
cg01423640_BC21	chr1	152879955	IVL	NM_005547.3	TSS1500	NA	17675599	II	Both	-	FALSE	TRUE
cg01423859_BO21	chr1	152918543	NA	NA	NA	NA	6649440	II	Both	-	FALSE	TRUE
cg01423859_TC21	chr1	152918543	NA	NA	NA	NA	66746273	II	Both	+	FALSE	TRUE
cg01423861_BC21	chr1	152919060	NA	NA	NA	NA	53792861	II	Both	-	FALSE	TRUE
cg01423861_TC21	chr1	152919060	NA	NA	NA	NA	13760182	II	Both	+	FALSE	TRUE
cg01423862_BC21	chr1	152919074	NA	NA	NA	NA	6632542	II	Both	-	FALSE	TRUE
cg01423862_TC21	chr1	152919074	NA	NA	NA	NA	73730199	II	Both	+	FALSE	TRUE
cg01423863_TC21	chr1	152919374	NA	NA	NA	NA	53745551	II	Both	+	FALSE	TRUE
cg01423865_TC21	chr1	152919520	NA	NA	NA	NA	44736579	II	Both	+	FALSE	TRUE
cg01424076_BC21	chr1	152941666	SPRR4	NM_173080.3	TSS1500	NA	50630523	II	Both	-	FALSE	TRUE
cg01424077_BC21	chr1	152942352	SPRR4	NM_173080.3	TSS1500	NA	20664200	II	Both	-	FALSE	TRUE
cg01424079_BC21	chr1	152942469	SPRR4	NM_173080.3	TSS1500	NA	5700301	II	Both	-	FALSE	TRUE
cg01424079_TC21	chr1	152942469	SPRR4	NM_173080.3	TSS1500	NA	27799861	II	Both	+	FALSE	TRUE
cg01424080_TC21	chr1	152942637	SPRR4	NM_173080.3	TSS1500	NA	90710187	II	Both	+	FALSE	TRUE
cg01424233_TC21	chr1	152973317	SPRR3	NM_005416.2	TSS1500	NA	88625280	II	Both	+	FALSE	TRUE
cg01424234_TC21	chr1	152973391	SPRR3	NM_005416.2	TSS1500	NA	91781240	II	Both	+	FALSE	TRUE
cg01424236_TC21	chr1	152973463	SPRR3	NM_005416.2	TSS1500	NA	59617868	II	Both	+	FALSE	TRUE
cg01424238_TC21	chr1	152973707	SPRR3	NM_005416.2	TSS1500	NA	96725593	II	Both	+	FALSE	TRUE
cg01424364_BC21	chr1	152994947	NA	NA	NA	NA	97678361	II	Both	-	FALSE	TRUE
cg01424366_TC21	chr1	152995512	NA	NA	NA	NA	19611186	II	Both	+	FALSE	TRUE
cg01424367_TC21	chr1	152995539	NA	NA	NA	NA	34723585	II	Both	+	FALSE	TRUE
cg01424374_TC21	chr1	152995922	NA	NA	NA	NA	63685171	II	Both	+	FALSE	TRUE
cg01424375_BC21	chr1	152995957	NA	NA	NA	NA	63758876	II	Both	-	FALSE	TRUE
cg01424403_BC21	chr1	153002606	SPRR1B	NM_003125.3	TSS1500	NA	81718242	II	Both	-	FALSE	TRUE
cg01425233_BC21	chr1	153174499	LELP1	NM_001010857.3	TSS1500	NA	50779906	II	Both	-	FALSE	TRUE
cg01425233_TC21	chr1	153174499	LELP1	NM_001010857.3	TSS1500	NA	89627313	II	Both	+	FALSE	TRUE
cg01425236_BC21	chr1	153175146	LELP1	NM_001010857.3	TSS1500	NA	15767856	II	Both	-	FALSE	TRUE
cg01425237_BC21	chr1	153175318	LELP1	NM_001010857.3	TSS1500	NA	13740273	II	Both	-	FALSE	TRUE
cg01425373_TC21	chr1	153189936	PRR9	NM_001195571.2	TSS200	NA	96697324	II	Both	+	FALSE	TRUE
cg01425432_BC21	chr1	153196268	NA	NA	NA	NA	4704176	II	Both	-	FALSE	TRUE
cg01425433_BC21	chr1	153196304	NA	NA	NA	NA	70788536	II	Both	-	FALSE	TRUE
cg01425433_TC21	chr1	153196304	NA	NA	NA	NA	64736252	II	Both	+	FALSE	TRUE
cg01425434_TC21	chr1	153196319	NA	NA	NA	NA	5772931	II	Both	+	FALSE	TRUE
cg01425435_BC21	chr1	153196380	NA	NA	NA	NA	2724158	II	Both	-	FALSE	TRUE
cg01425435_TC21	chr1	153196380	NA	NA	NA	NA	10778285	II	Both	+	FALSE	TRUE
cg01425437_BC21	chr1	153196898	NA	NA	NA	NA	3798464	II	Both	-	FALSE	TRUE
cg01425437_TO21	chr1	153196898	NA	NA	NA	NA	66678218	II	Both	+	FALSE	TRUE
cg01425438_TC21	chr1	153196960	NA	NA	NA	NA	88777398	II	Both	+	FALSE	TRUE
cg01425439_TC21	chr1	153196976	NA	NA	NA	NA	77801110	II	Both	+	FALSE	TRUE
cg01425443_TC21	chr1	153197371	NA	NA	NA	NA	92632865	II	Both	+	FALSE	TRUE
cg01426350_BC21	chr1	153303974	PGLYRP4	NM_020393.4	TSSBody	NA	9757542	II	Both	-	FALSE	TRUE
cg01426350_TO21	chr1	153303974	PGLYRP4	NM_020393.4	TSSBody	NA	77741174	II	Both	+	FALSE	TRUE
cg01427158_BC1	chr1	153390600	S100A8	NM_001319198.1	TSSBody	6747506	76772945	I	Red	-	TRUE	TRUE
cg01427158_BC21	chr1	153390600	S100A8	NM_001319198.1	TSSBody	NA	6728254	II	Both	-	TRUE	TRUE
cg01427158_TC1	chr1	153390600	S100A8	NM_001319198.1	TSSBody	37750981	75617935	I	Red	+	FALSE	TRUE
cg01427158_TC21	chr1	153390600	S100A8	NM_001319198.1	TSSBody	NA	90630260	II	Both	+	FALSE	TRUE
cg01427163_BO1	chr1	153390968	S100A8	NM_001319198.1	TSSBody	7797923	46666967	I	Grn	-	FALSE	TRUE
cg01427163_TC1	chr1	153390968	S100A8	NM_001319198.1	TSSBody	76610374	58609876	I	Grn	+	TRUE	TRUE
cg01427163_TC21	chr1	153390968	S100A8	NM_001319198.1	TSSBody	NA	51802826	II	Both	+	TRUE	TRUE
cg01427169_BO1	chr1	153391760	S100A8	NM_001319198.1	TSSBody	82643398	77671935	I	Grn	-	FALSE	TRUE
cg01427169_BO21	chr1	153391760	S100A8	NM_001319198.1	TSSBody	NA	29621969	II	Both	-	FALSE	TRUE
cg01427169_TC1	chr1	153391760	S100A8	NM_001319198.1	TSSBody	60690877	94709895	I	Grn	+	TRUE	TRUE
cg01427169_TC21	chr1	153391760	S100A8	NM_001319198.1	TSSBody	NA	74741120	II	Both	+	TRUE	TRUE
cg01427518_TO1	chr1	153431447	S100A7	NM_002963.4	TSSBody	96603305	11629833	I	Grn	+	TRUE	TRUE
cg01427518_TO21	chr1	153431447	S100A7	NM_002963.4	TSSBody	NA	70755222	II	Both	+	TRUE	TRUE
cg01429578_BO21	chr6	31727657	MSH5	NM_172165.3	TSSBody	NA	6790861	II	Both	-	FALSE	TRUE
cg01429578_TC21	chr6	31727657	MSH5	NM_172165.3	TSSBody	NA	73767273	II	Both	+	FALSE	TRUE
cg01429683_BO21	chr1	153598903	S100A13	NM_001024210.2	TSSBody	NA	84641252	II	Both	-	FALSE	TRUE
cg01429683_TC21	chr1	153598903	S100A13	NM_001024210.2	TSSBody	NA	27716571	II	Both	+	FALSE	TRUE
cg01429684_TC21	chr1	153599177	S100A13	NM_001024210.2	TSSBody	NA	2668130	II	Both	+	FALSE	TRUE
cg01429685_BC21	chr1	153599247	S100A13	NM_001024210.2	TSSBody	NA	99624561	II	Both	-	FALSE	TRUE
cg01429686_BC21	chr1	153599299	S100A13	NM_001024210.2	TSSBody	NA	50675225	II	Both	-	FALSE	TRUE
cg01429686_TC21	chr1	153599299	S100A13	NM_001024210.2	TSSBody	NA	75650267	II	Both	+	FALSE	TRUE
cg01429687_TC21	chr1	153599384	S100A13	NM_001024210.2	TSSBody	NA	6794348	II	Both	+	FALSE	TRUE
cg01429688_BC21	chr1	153599493	S100A13	NM_001024210.2	TSSBody	NA	53787923	II	Both	-	FALSE	TRUE
cg01429689_TC21	chr1	153599512	S100A13	NM_001024210.2	TSSBody	NA	46716822	II	Both	+	FALSE	TRUE
cg01429690_TC21	chr1	153599601	S100A13	NM_001024210.2	TSSBody	NA	8695881	II	Both	+	FALSE	TRUE
cg01429692_BC21	chr1	153599733	S100A13	NM_001024210.2	TSSBody	NA	16693152	II	Both	-	FALSE	TRUE
cg01429694_TC21	chr1	153599960	S100A13	NM_001024210.2	TSSBody	NA	3769303	II	Both	+	FALSE	TRUE
cg01429696_BC21	chr1	153600047	S100A13	NM_001024210.2	TSSBody	NA	45704593	II	Both	-	FALSE	TRUE
cg01429697_BC21	chr1	153600070	S100A13	NM_001024210.2	TSSBody	NA	5713893	II	Both	-	FALSE	TRUE
cg01429698_BC21	chr1	153600103	S100A13	NM_001024210.2	TSSBody	NA	61772136	II	Both	-	FALSE	TRUE
cg01429698_BO21	chr1	153600103	S100A13	NM_001024210.2	TSSBody	NA	17640587	II	Both	-	FALSE	TRUE
cg01429698_TC21	chr1	153600103	S100A13	NM_001024210.2	TSSBody	NA	43732115	II	Both	+	FALSE	TRUE
cg01429746_BC21	chr1	153605142	CHTOP	NM_001244664.1	TSS1500	NA	19763981	II	Both	-	FALSE	TRUE
cg01429746_TC21	chr1	153605142	CHTOP	NM_001244664.1	TSS1500	NA	87668566	II	Both	+	FALSE	TRUE
cg01429746_TO21	chr1	153605142	CHTOP	NM_001244664.1	TSS1500	NA	92775843	II	Both	+	FALSE	TRUE
cg01429749_TC21	chr1	153605259	CHTOP	NM_001244664.1	TSS1500	NA	6652820	II	Both	+	FALSE	TRUE
cg01429749_TO21	chr1	153605259	CHTOP	NM_001244664.1	TSS1500	NA	1767953	II	Both	+	FALSE	TRUE
cg01429760_BC21	chr1	153605783	CHTOP	NM_001244664.1	TSS1500	NA	88640453	II	Both	-	FALSE	TRUE
cg01429763_TC21	chr1	153605925	CHTOP	NM_001244664.1	TSS1500	NA	71636834	II	Both	+	FALSE	TRUE
cg01429765_TC21	chr1	153605931	CHTOP	NM_001244664.1	TSS1500	NA	80629251	II	Both	+	FALSE	TRUE
cg01429766_TC21	chr1	153605937	CHTOP	NM_001244664.1	TSS1500	NA	52607255	II	Both	+	FALSE	TRUE
cg01429769_BC21	chr1	153606102	CHTOP	NM_001244664.1	TSS1500	NA	49803139	II	Both	-	FALSE	TRUE
cg01429769_TC21	chr1	153606102	CHTOP	NM_001244664.1	TSS1500	NA	55788882	II	Both	+	FALSE	TRUE
cg01429770_BC21	chr1	153606128	CHTOP	NM_001244664.1	TSS1500	NA	90725419	II	Both	-	FALSE	TRUE
cg01429770_TC21	chr1	153606128	CHTOP	NM_001244664.1	TSS1500	NA	76643962	II	Both	+	FALSE	TRUE
cg01429771_BC21	chr1	153606188	CHTOP	NM_001244664.1	TSS1500	NA	72728156	II	Both	-	FALSE	TRUE
cg01429771_TC21	chr1	153606188	CHTOP	NM_001244664.1	TSS1500	NA	58704892	II	Both	+	FALSE	TRUE
cg01429771_TO21	chr1	153606188	CHTOP	NM_001244664.1	TSS1500	NA	77611228	II	Both	+	FALSE	TRUE
cg01429776_BC21	chr1	153606246	CHTOP	NM_001244664.1	TSS1500	NA	31636854	II	Both	-	FALSE	TRUE
cg01429778_TC21	chr1	153606371	CHTOP	NM_001244664.1	TSS200	NA	13701181	II	Both	+	FALSE	TRUE
cg01429778_TO21	chr1	153606371	CHTOP	NM_001244664.1	TSS200	NA	93777400	II	Both	+	FALSE	TRUE
cg01429787_TC21	chr1	153606489	CHTOP	NM_001244664.1	TSSBody	NA	13710229	II	Both	+	FALSE	TRUE
cg01429788_BC21	chr1	153606496	CHTOP	NM_001244664.1	TSSBody	NA	4750291	II	Both	-	FALSE	TRUE
cg01429790_BO21	chr1	153606510	CHTOP	NM_001244664.1	TSSBody	NA	81720232	II	Both	-	FALSE	TRUE
cg01429790_TC21	chr1	153606510	CHTOP	NM_001244664.1	TSSBody	NA	91622370	II	Both	+	FALSE	TRUE
cg01429791_BC21	chr1	153606522	CHTOP	NM_001244664.1	TSSBody	NA	7609185	II	Both	-	FALSE	TRUE
cg01429791_TO21	chr1	153606522	CHTOP	NM_001244664.1	TSSBody	NA	94770907	II	Both	+	FALSE	TRUE
cg01429876_TC21	chr1	153609290	CHTOP	NM_001244664.1	TSSBody	NA	73678279	II	Both	+	FALSE	TRUE
cg01429877_TC21	chr1	153609404	CHTOP	NM_001244664.1	TSSBody	NA	78661119	II	Both	+	FALSE	TRUE
cg01429878_BC21	chr1	153609851	CHTOP	NM_001244664.1	TSSBody	NA	58692599	II	Both	-	FALSE	TRUE
cg01429880_TC21	chr1	153609853	CHTOP	NM_001244664.1	TSSBody	NA	81666253	II	Both	+	FALSE	TRUE
cg01429888_BC21	chr1	153610125	CHTOP	NM_001244664.1	TSSBody	NA	90701505	II	Both	-	FALSE	TRUE
cg01429890_TC21	chr1	153610539	CHTOP	NM_001244664.1	TSSBody	NA	1712423	II	Both	+	FALSE	TRUE
cg01453221_TC21	chr6	31865268	EHMT2	NM_001318833.1	TSS1500	NA	65808139	II	Both	+	FALSE	TRUE
cg01462744_TC21	chr6	30457252	HLA-E	NM_005516.6	TSS200	NA	13753110	II	Both	+	FALSE	TRUE
cg01462744_TO21	chr6	30457252	HLA-E	NM_005516.6	TSS200	NA	50601869	II	Both	+	FALSE	TRUE
cg01462864_TC1	chr1	155653317	YY1AP1	NM_139118.2	TSSBody	72700182	71806567	I	Red	+	TRUE	TRUE
cg01465130_BC1	chr15	43459262	TMEM62	NM_001347030.1	TSSBody	41735181	57749261	I	Red	-	TRUE	TRUE
cg01465527_BC21	chr6	29548535	SNORD32B	NR_003049.1	TSS1500	NA	92771837	II	Both	-	FALSE	TRUE
cg01465527_TC21	chr6	29548535	SNORD32B	NR_003049.1	TSS1500	NA	95746419	II	Both	+	FALSE	TRUE
cg01468420_TC21	chr6	33393112	SYNGAP1	NM_001130066.2	TSSBody	NA	49713242	II	Both	+	FALSE	TRUE
cg01498733_TC21	chr1	158968325	IFI16	NM_001364867.2	TSS1500	NA	46621905	II	Both	+	FALSE	TRUE
cg01498733_TO21	chr1	158968325	IFI16	NM_001364867.2	TSS1500	NA	37686275	II	Both	+	FALSE	TRUE
cg01498734_BC21	chr1	158968377	IFI16	NM_001364867.2	TSS1500	NA	27768585	II	Both	-	FALSE	TRUE
cg01498734_TC21	chr1	158968377	IFI16	NM_001364867.2	TSS1500	NA	88605367	II	Both	+	FALSE	TRUE
cg01498735_BC21	chr1	158968564	IFI16	NM_001364867.2	TSS1500	NA	98665549	II	Both	-	FALSE	TRUE
cg01498735_TC21	chr1	158968564	IFI16	NM_001364867.2	TSS1500	NA	61603522	II	Both	+	FALSE	TRUE
cg01498736_TC21	chr1	158968620	IFI16	NM_001364867.2	TSS1500	NA	45636848	II	Both	+	FALSE	TRUE
cg01498736_TO21	chr1	158968620	IFI16	NM_001364867.2	TSS1500	NA	73733156	II	Both	+	FALSE	TRUE
cg01498737_BC21	chr1	158968634	IFI16	NM_001364867.2	TSS1500	NA	85624125	II	Both	-	FALSE	TRUE
cg01498737_BO21	chr1	158968634	IFI16	NM_001364867.2	TSS1500	NA	39611559	II	Both	-	FALSE	TRUE
cg01498737_TO21	chr1	158968634	IFI16	NM_001364867.2	TSS1500	NA	74712158	II	Both	+	FALSE	TRUE
cg01498738_TC21	chr1	158968740	IFI16	NM_001364867.2	TSS1500	NA	76670306	II	Both	+	FALSE	TRUE
cg01498739_BC21	chr1	158968748	IFI16	NM_001364867.2	TSS1500	NA	70780828	II	Both	-	FALSE	TRUE
cg01498742_TC21	chr1	158968878	IFI16	NM_001364867.2	TSS1500	NA	43777969	II	Both	+	FALSE	TRUE
cg01498747_TC21	chr1	158968902	IFI16	NM_001364867.2	TSS1500	NA	81744434	II	Both	+	FALSE	TRUE
cg01498748_BC21	chr1	158968917	IFI16	NM_001364867.2	TSS1500	NA	51718584	II	Both	-	FALSE	TRUE
cg01498750_BC21	chr1	158969220	IFI16	NM_001364867.2	TSS1500	NA	26646920	II	Both	-	FALSE	TRUE
cg01498754_TC21	chr1	158969446	IFI16	NM_001364867.2	TSS1500	NA	15784189	II	Both	+	FALSE	TRUE
cg01498755_TC21	chr1	158969596	IFI16	NM_001364867.2	TSS200	NA	28604118	II	Both	+	FALSE	TRUE
cg01498801_TC21	chr1	158974475	IFI16	NM_001364867.2	TSSBody	NA	34740885	II	Both	+	FALSE	TRUE
cg01498803_BC21	chr1	158974854	IFI16	NM_001364867.2	TSSBody	NA	68603591	II	Both	-	FALSE	TRUE
cg01498804_BC21	chr1	158974883	IFI16	NM_001364867.2	TSSBody	NA	54652922	II	Both	-	FALSE	TRUE
cg01498804_TC21	chr1	158974883	IFI16	NM_001364867.2	TSSBody	NA	80802961	II	Both	+	FALSE	TRUE
cg01498805_BC21	chr1	158974904	IFI16	NM_001364867.2	TSSBody	NA	21810869	II	Both	-	FALSE	TRUE
cg01498806_TC21	chr1	158974909	IFI16	NM_001364867.2	TSSBody	NA	58641253	II	Both	+	FALSE	TRUE
cg01498830_BC21	chr1	158977310	IFI16	NM_001364867.2	TSSBody	NA	45750276	II	Both	-	FALSE	TRUE
cg01498835_BO21	chr1	158978268	IFI16	NM_001206567.2	TSS1500	NA	80705498	II	Both	-	FALSE	TRUE
cg01498835_TC21	chr1	158978268	IFI16	NM_001206567.2	TSS1500	NA	2779397	II	Both	+	FALSE	TRUE
cg01498838_BC21	chr1	158978997	IFI16	NM_001206567.2	TSS1500	NA	76758567	II	Both	-	FALSE	TRUE
cg01498870_BC21	chr1	158983200	IFI16	NM_001364867.2	TSSBody	NA	19796162	II	Both	-	FALSE	TRUE
cg01498876_BC1	chr1	158984054	IFI16	NM_001364867.2	TSSBody	97672861	55740986	I	Red	-	FALSE	TRUE
cg01498876_BC21	chr1	158984054	IFI16	NM_001364867.2	TSSBody	NA	48796118	II	Both	-	FALSE	TRUE
cg01498876_BC22	chr1	158984054	IFI16	NM_001364867.2	TSSBody	NA	92748376	II	Both	-	FALSE	TRUE
cg01498876_BO21	chr1	158984054	IFI16	NM_001364867.2	TSSBody	NA	35699555	II	Both	-	TRUE	TRUE
cg01498876_TC1	chr1	158984054	IFI16	NM_001364867.2	TSSBody	75789923	45768271	I	Grn	+	TRUE	TRUE
cg01498876_TC21	chr1	158984054	IFI16	NM_001364867.2	TSSBody	NA	76706279	II	Both	+	TRUE	TRUE
cg01498879_TC21	chr1	158984677	IFI16	NM_001364867.2	TSSBody	NA	19646121	II	Both	+	FALSE	TRUE
cg01498880_TC21	chr1	158984691	IFI16	NM_001364867.2	TSSBody	NA	44752544	II	Both	+	FALSE	TRUE
cg01498881_TC21	chr1	158984811	IFI16	NM_001364867.2	TSSBody	NA	42783879	II	Both	+	FALSE	TRUE
cg01499060_BC21	chr1	159001521	IFI16	NM_001364867.2	TSSBody	NA	9715233	II	Both	-	FALSE	TRUE
cg01499167_BC1	chr1	159018761	IFI16	NM_001364867.2	TSSBody	68806599	38777553	I	Red	-	TRUE	TRUE
cg01499167_BC21	chr1	159018761	IFI16	NM_001364867.2	TSSBody	NA	8809189	II	Both	-	TRUE	TRUE
cg01499167_TC1	chr1	159018761	IFI16	NM_001364867.2	TSSBody	17621539	50627219	I	Red	+	FALSE	TRUE
cg01499167_TC21	chr1	159018761	IFI16	NM_001364867.2	TSSBody	NA	53762178	II	Both	+	FALSE	TRUE
cg01499606_TC21	chr1	158985352	IFI16	NM_001364867.2	TSSBody	NA	36719235	II	Both	+	FALSE	TRUE
cg01506341_BC21	chr6	30104709	TRIM40	NM_001286633.2	TSSBody	NA	97752587	II	Both	-	FALSE	TRUE
cg01506341_TO21	chr6	30104709	TRIM40	NM_001286633.2	TSSBody	NA	94695459	II	Both	+	FALSE	TRUE
cg01535635_BC21	chr17	41163970	IFI35	NM_001330230.2	TSSBody	NA	29742848	II	Both	-	FALSE	TRUE
cg01535635_TC21	chr17	41163970	IFI35	NM_001330230.2	TSSBody	NA	51669953	II	Both	+	FALSE	TRUE
cg01535635_TO21	chr17	41163970	IFI35	NM_001330230.2	TSSBody	NA	32796236	II	Both	+	FALSE	TRUE
cg01540301_TC21	chr6	32940371	BRD2	NM_005104.4	TSSBody	NA	89729990	II	Both	+	FALSE	TRUE
cg01547742_BC21	chr6	32821155	TAP1	NM_000593.5	TSSBody	NA	95746412	II	Both	-	FALSE	TRUE
cg01554625_BC21	chr6	30688579	TUBB	NM_001293214.2	TSSBody	NA	41620174	II	Both	-	FALSE	TRUE
cg01554777_BC21	chr4	154622943	TLR2	NM_001318793.2	TSSBody	NA	45601920	II	Both	-	FALSE	TRUE
cg01574481_BC21	chr14	24641852	REC8	NM_005132.3	TSSBody	NA	66644141	II	Both	-	FALSE	TRUE
cg01595997_TC21	chr6	31915184	CFB	NM_001710.6	TSSBody	NA	90725408	II	Both	+	FALSE	TRUE
cg01595997_TO21	chr6	31915184	CFB	NM_001710.6	TSSBody	NA	8618909	II	Both	+	FALSE	TRUE
cg01606580_TC1	chr3	15783479	ANKRD28	NM_001349279.2	TSSBody	64688251	50602954	I	Red	+	TRUE	TRUE
cg01628905_BC21	chr6	33389696	SYNGAP1	NM_001130066.2	TSSBody	NA	99759185	II	Both	-	FALSE	TRUE
cg01628905_TC21	chr6	33389696	SYNGAP1	NM_001130066.2	TSSBody	NA	6773170	II	Both	+	FALSE	TRUE
cg01634707_BC1	chr1	176364662	NA	NA	NA	4784504	11689264	I	Grn	-	TRUE	TRUE
cg01645115_TC21	chr6	31851358	EHMT2	NM_006709.5	TSSBody	NA	38614187	II	Both	+	FALSE	TRUE
cg01648751_BC21	chr5	38931978	OSMR	NM_001323505.2	TSSBody	NA	5700123	II	Both	-	FALSE	TRUE
cg01652681_BC21	chr6	32937649	BRD2	NM_001113182.3	TSS1500	NA	87763497	II	Both	-	FALSE	TRUE
cg01674119_BC21	chr6	31583231	AIF1	NM_001318970.2	TSSBody	NA	76808107	II	Both	-	FALSE	TRUE
cg01678893_BO21	chr19	13049949	CALR	NM_004343.3	TSSBody	NA	89726884	II	Both	-	FALSE	TRUE
cg01678893_TC21	chr19	13049949	CALR	NM_004343.3	TSSBody	NA	92772506	II	Both	+	FALSE	TRUE
cg01702338_BC21	chr6	32812571	PSMB8-AS1	NR_037176.1	TSSBody	NA	69646175	II	Both	-	FALSE	TRUE
cg01702338_TO21	chr6	32812571	PSMB8-AS1	NR_037176.1	TSSBody	NA	23644836	II	Both	+	FALSE	TRUE
cg01734628_BC21	chr6	31926014	NELFE	NM_002904.6	TSSBody	NA	35803949	II	Both	-	FALSE	TRUE
cg01775827_TC21	chr1	196619772	CFH	NM_001014975.2	TSS1500	NA	2712439	II	Both	+	FALSE	TRUE
cg01775830_BC21	chr1	196620386	CFH	NM_001014975.2	TSS1500	NA	10706547	II	Both	-	FALSE	TRUE
cg01775979_TC21	chr1	196644798	CFH	NM_001014975.2	TSSBody	NA	93796212	II	Both	+	FALSE	TRUE
cg01775981_BC21	chr1	196645057	CFH	NM_001014975.2	TSSBody	NA	71689238	II	Both	-	FALSE	TRUE
cg01775984_BC21	chr1	196645380	CFH	NM_001014975.2	TSSBody	NA	76674112	II	Both	-	FALSE	TRUE
cg01775984_TC21	chr1	196645380	CFH	NM_001014975.2	TSSBody	NA	5741484	II	Both	+	FALSE	TRUE
cg01775988_TC21	chr1	196645591	CFH	NM_001014975.2	TSSBody	NA	40657176	II	Both	+	FALSE	TRUE
cg01775988_TO21	chr1	196645591	CFH	NM_001014975.2	TSSBody	NA	79742562	II	Both	+	FALSE	TRUE
cg01775990_TC21	chr1	196645847	CFH	NM_001014975.2	TSSBody	NA	92605522	II	Both	+	FALSE	TRUE
cg01776269_TC1	chr1	196692993	CFH	NM_000186.4	TSSBody	2805389	99784491	I	Red	+	FALSE	TRUE
cg01776269_TC21	chr1	196692993	CFH	NM_000186.4	TSSBody	NA	81759107	II	Both	+	FALSE	TRUE
cg01776269_TO21	chr1	196692993	CFH	NM_000186.4	TSSBody	NA	59733128	II	Both	+	FALSE	TRUE
cg01776343_BC21	chr1	196705008	CFH	NM_000186.4	TSSBody	NA	40758211	II	Both	-	FALSE	TRUE
cg01776343_BO21	chr1	196705008	CFH	NM_000186.4	TSSBody	NA	88678853	II	Both	-	FALSE	TRUE
cg01776345_BC21	chr1	196705072	CFH	NM_000186.4	TSSBody	NA	3690188	II	Both	-	FALSE	TRUE
cg01776345_TC21	chr1	196705072	CFH	NM_000186.4	TSSBody	NA	9720851	II	Both	+	FALSE	TRUE
cg01776346_BC21	chr1	196705171	CFH	NM_000186.4	TSSBody	NA	3652113	II	Both	-	FALSE	TRUE
cg01776346_TC21	chr1	196705171	CFH	NM_000186.4	TSSBody	NA	67674295	II	Both	+	FALSE	TRUE
cg01776347_TC21	chr1	196705234	CFH	NM_000186.4	TSSBody	NA	35604553	II	Both	+	FALSE	TRUE
cg01776387_BO1	chr1	196712388	CFH	NM_000186.4	TSSBody	94666507	98665478	I	Grn	-	FALSE	TRUE
cg01776387_BO21	chr1	196712388	CFH	NM_000186.4	TSSBody	NA	64678222	II	Both	-	FALSE	TRUE
cg01776387_TO1	chr1	196712388	CFH	NM_000186.4	TSSBody	70658546	97773472	I	Grn	+	FALSE	TRUE
cg01776387_TO21	chr1	196712388	CFH	NM_000186.4	TSSBody	NA	35700298	II	Both	+	TRUE	TRUE
cg01776401_BC1	chr1	196714080	CFH	NM_000186.4	TSSBody	1677437	82773593	I	Red	-	FALSE	TRUE
cg01776401_BC21	chr1	196714080	CFH	NM_000186.4	TSSBody	NA	97716212	II	Both	-	FALSE	TRUE
cg01776401_TC1	chr1	196714080	CFH	NM_000186.4	TSSBody	40755291	45609597	I	Red	+	TRUE	TRUE
cg01776401_TC2	chr1	196714080	CFH	NM_000186.4	TSSBody	97746567	45609597	I	Red	+	TRUE	TRUE
cg01776401_TC21	chr1	196714080	CFH	NM_000186.4	TSSBody	NA	3675236	II	Both	+	TRUE	TRUE
cg01776401_TC22	chr1	196714080	CFH	NM_000186.4	TSSBody	NA	66753959	II	Both	+	TRUE	TRUE
cg01776401_TC3	chr1	196714080	CFH	NM_000186.4	TSSBody	40755291	60799142	I	Red	+	TRUE	TRUE
cg01776401_TC4	chr1	196714080	CFH	NM_000186.4	TSSBody	97746567	60799142	I	Red	+	TRUE	TRUE
cg01776589_BC21	chr1	196743021	CFHR3	NM_001166624.1	TSS1500	NA	49794520	II	Both	-	FALSE	TRUE
cg01776704_BC1	chr1	196757176	CFHR3	NM_001166624.1	TSSBody	90788428	62713905	I	Red	-	FALSE	TRUE
cg01776704_BC21	chr1	196757176	CFHR3	NM_001166624.1	TSSBody	NA	25640258	II	Both	-	FALSE	TRUE
cg01776715_BC21	chr1	196758153	CFHR3	NM_001166624.1	TSSBody	NA	76614824	II	Both	-	FALSE	TRUE
cg01776721_TO1	chr1	196759266	CFHR3	NM_001166624.1	TSSBody	81759941	25645132	I	Grn	+	FALSE	TRUE
cg01776907_TO1	chr1	196789771	CFHR1	NM_002113.2	TSSBody	2643909	12631287	I	Grn	+	FALSE	TRUE
cg01776907_TO21	chr1	196789771	CFHR1	NM_002113.2	TSSBody	NA	30683870	II	Both	+	FALSE	TRUE
cg01776971_BC1	chr1	196798707	CFHR1	NM_002113.2	TSSBody	68797853	68757972	I	Red	-	FALSE	TRUE
cg01776971_BC21	chr1	196798707	CFHR1	NM_002113.2	TSSBody	NA	45604176	II	Both	-	FALSE	TRUE
cg01777508_TC1	chr1	196881700	CFHR4	NM_001201551.2	TSSBody	9707959	99785980	I	Red	+	TRUE	TRUE
cg01777508_TC21	chr1	196881700	CFHR4	NM_001201551.2	TSSBody	NA	72657185	II	Both	+	TRUE	TRUE
cg01777522_BC1	chr1	196884177	CFHR4	NM_001201551.2	TSSBody	49793242	19795205	I	Red	-	TRUE	TRUE
cg01777522_BC21	chr1	196884177	CFHR4	NM_001201551.2	TSSBody	NA	91717938	II	Both	-	TRUE	TRUE
cg01777522_TC1	chr1	196884177	CFHR4	NM_001201551.2	TSSBody	85800125	2654856	I	Red	+	TRUE	TRUE
cg01777522_TC21	chr1	196884177	CFHR4	NM_001201551.2	TSSBody	NA	9680214	II	Both	+	TRUE	TRUE
cg01777705_BO1	chr1	196913807	CFHR2	NM_005666.4	TSSBody	22652550	81678489	I	Grn	-	TRUE	TRUE
cg01777705_BO21	chr1	196913807	CFHR2	NM_005666.4	TSSBody	NA	46684129	II	Both	-	TRUE	TRUE
cg01778552_TC1	chr1	197056441	ASPM	NM_001206846.1	TSSBody	10725829	3769246	I	Red	+	TRUE	TRUE
cg01787953_BC21	chr6	31707589	MSH5	NM_172165.3	TSS200	NA	57653166	II	Both	-	FALSE	TRUE
cg01859195_BC21	chr12	64845239	TBK1	NM_013254.4	TSS1500	NA	68806543	II	Both	-	FALSE	TRUE
cg01859195_TC21	chr12	64845239	TBK1	NM_013254.4	TSS1500	NA	91787193	II	Both	+	FALSE	TRUE
cg01869058_BC21	chr6	31926196	NELFE	NM_002904.6	TSSBody	NA	14780581	II	Both	-	FALSE	TRUE
cg01869058_BO21	chr6	31926196	NELFE	NM_002904.6	TSSBody	NA	42761560	II	Both	-	FALSE	TRUE
cg01869058_TC21	chr6	31926196	NELFE	NM_002904.6	TSSBody	NA	90675540	II	Both	+	FALSE	TRUE
cg01874713_BC21	chr10	104153773	NFKB2	NM_001322935.1	TSS200	NA	61609122	II	Both	-	FALSE	TRUE
cg01878788_BC21	chr6	33176342	RING1	NM_002931.4	TSSBody	NA	85783582	II	Both	-	FALSE	TRUE
cg01880149_BC21	chr1	152284601	FLG	NM_002016.2	TSSBody	NA	69740876	II	Both	-	FALSE	TRUE
cg01886988_BC21	chr11	312560	IFITM1	NM_003641.4	TSS1500	NA	97716282	II	Both	-	FALSE	TRUE
cg01897517_BC21	chr6	32821111	TAP1	NM_000593.5	TSSBody	NA	43687219	II	Both	-	FALSE	TRUE
cg01897517_TC21	chr6	32821111	TAP1	NM_000593.5	TSSBody	NA	5709227	II	Both	+	FALSE	TRUE
cg01909833_BO21	chr6	32937267	BRD2	NM_001113182.3	TSS1500	NA	64604275	II	Both	-	FALSE	TRUE
cg01909833_TC21	chr6	32937267	BRD2	NM_001113182.3	TSS1500	NA	97649841	II	Both	+	FALSE	TRUE
cg01925063_BC1	chr1	212482718	PPP2R5A	NM_006243.4	TSSBody	9787335	41768181	I	Grn	-	TRUE	TRUE
cg01927550_BC21	chr14	103336789	TRAF3	NM_001199427.2	TSSBody	NA	78603189	II	Both	-	FALSE	TRUE
cg01934658_BC1	chr1	213324422	RPS6KC1	NM_001349665.1	TSSBody	2702576	9602203	I	Grn	-	TRUE	TRUE
cg01934658_BC2	chr1	213324422	RPS6KC1	NM_001349665.1	TSSBody	75762118	9602203	I	Grn	-	TRUE	FALSE
cg01934781_BC21	chr12	12223947	BCL2L14	NM_001370268.1	TSSBody	NA	7734861	II	Both	-	FALSE	TRUE
cg01934781_TC21	chr12	12223947	BCL2L14	NM_001370268.1	TSSBody	NA	9710847	II	Both	+	FALSE	TRUE
cg01934783_TC1	chr1	213325875	RPS6KC1	NM_001349665.1	TSSBody	58707934	68612961	I	Red	+	TRUE	TRUE
cg01941836_BC21	chr6	31049336	NA	NA	NA	NA	61644551	II	Both	-	FALSE	TRUE
cg01941836_TO21	chr6	31049336	NA	NA	NA	NA	71674202	II	Both	+	FALSE	TRUE
cg01943874_TC21	chr20	44746944	CD40	NM_001322422.2	TSS200	NA	17699113	II	Both	+	FALSE	TRUE
cg01949572_TC1	chr9	128090905	GAPVD1	NM_001282681.3	TSSBody	71715879	81711391	I	Red	+	TRUE	TRUE
cg01963064_TC21	chr6	32319256	TSBP1	NM_006781.5	TSSBody	NA	97803181	II	Both	+	FALSE	TRUE
cg01963278_TC1	chr6	30457850	HLA-E	NM_005516.6	TSSBody	66745551	65740117	I	Red	+	FALSE	TRUE
cg01983105_BC21	chr4	103421224	NFKB1	NM_001165412.2	TSS1500	NA	2624378	II	Both	-	FALSE	TRUE
cg01983105_TC21	chr4	103421224	NFKB1	NM_001165412.2	TSS1500	NA	78807868	II	Both	+	FALSE	TRUE
cg01999046_BC21	chr9	139779708	TRAF2	NM_021138.4	TSS1500	NA	9745970	II	Both	-	FALSE	TRUE
cg01999046_TC21	chr9	139779708	TRAF2	NM_021138.4	TSS1500	NA	97754843	II	Both	+	FALSE	TRUE
cg02007150_TC21	chr6	30293518	TRIM39	NM_001369522.1	TSS1500	NA	50664580	II	Both	+	FALSE	TRUE
cg02017634_BC21	chr21	42791359	MX1	NM_001144925.2	TSS1500	NA	6603246	II	Both	-	FALSE	TRUE
cg02017634_BO21	chr21	42791359	MX1	NM_001144925.2	TSS1500	NA	94734173	II	Both	-	FALSE	TRUE
cg02035039_BC1	chr6	29691888	HLA-F	NM_018950.2	TSSBody	89653943	81784173	I	Grn	-	FALSE	TRUE
cg02035039_BC21	chr6	29691888	HLA-F	NM_018950.2	TSSBody	NA	93744418	II	Both	-	FALSE	TRUE
cg02035097_BC21	chr6	32945219	BRD2	NM_005104.4	TSSBody	NA	76675130	II	Both	-	FALSE	TRUE
cg02035097_TC21	chr6	32945219	BRD2	NM_005104.4	TSSBody	NA	53645295	II	Both	+	FALSE	TRUE
cg02046600_BO21	chr6	30878499	GTF2H4	NM_001517.5	TSSBody	NA	32619856	II	Both	-	FALSE	TRUE
cg02046600_TC21	chr6	30878499	GTF2H4	NM_001517.5	TSSBody	NA	58739256	II	Both	+	FALSE	TRUE
cg02060465_BC21	chr1	152941727	SPRR4	NM_173080.3	TSS1500	NA	4657233	II	Both	-	FALSE	TRUE
cg02060465_BO21	chr1	152941727	SPRR4	NM_173080.3	TSS1500	NA	45747584	II	Both	-	FALSE	TRUE
cg02064543_TC21	chr6	33393646	SYNGAP1	NM_001130066.2	TSSBody	NA	47787877	II	Both	+	FALSE	TRUE
cg02067612_TC21	chr6	31725978	MSH5	NM_172165.3	TSSBody	NA	82760337	II	Both	+	FALSE	TRUE
cg02090806_BC21	chr6	33239496	VPS52	NM_001289175.1	TSSBody	NA	90629420	II	Both	-	FALSE	TRUE
cg02108998_BO21	chr6	31690986	MPIG6B	NM_138275.2	TSS200	NA	10628297	II	Both	-	FALSE	TRUE
cg02108998_TC21	chr6	31690986	MPIG6B	NM_138275.2	TSS200	NA	76776131	II	Both	+	FALSE	TRUE
cg02125896_BO21	chr12	6895774	NA	NA	NA	NA	80638957	II	Both	-	FALSE	TRUE
cg02125896_TC21	chr12	6895774	NA	NA	NA	NA	4609284	II	Both	+	FALSE	TRUE
cg02128365_TC21	chr6	31707511	MSH5	NM_172165.3	TSS1500	NA	82672822	II	Both	+	FALSE	TRUE
cg02149965_TC21	chr6	30883203	VARS2	NM_001167733.2	TSSBody	NA	57725553	II	Both	+	FALSE	TRUE
cg02163846_BC21	chr9	139776005	NA	NA	NA	NA	26782533	II	Both	-	FALSE	TRUE
cg02163846_BO21	chr9	139776005	NA	NA	NA	NA	15606203	II	Both	-	FALSE	TRUE
cg02163846_TC21	chr9	139776005	NA	NA	NA	NA	75752129	II	Both	+	FALSE	TRUE
cg02164110_TC21	chr6	31129244	TCF19	NM_001077511.2	TSSBody	NA	66755876	II	Both	+	FALSE	TRUE
cg02167193_BC21	chr6	30688035	TUBB	NM_001293214.2	TSS200	NA	78796205	II	Both	-	FALSE	TRUE
cg02174486_TC21	chr6	31600348	PRRC2A	NM_080686.3	TSSBody	NA	82762464	II	Both	+	FALSE	TRUE
cg02186769_BC21	chr6	30881645	VARS2	NM_001167733.2	TSS1500	NA	76734525	II	Both	-	FALSE	TRUE
cg02202484_BO21	chr1	152942688	SPRR4	NM_173080.3	TSS1500	NA	15781964	II	Both	-	FALSE	TRUE
cg02202484_TC21	chr1	152942688	SPRR4	NM_173080.3	TSS1500	NA	41636520	II	Both	+	FALSE	TRUE
cg02203106_BC21	chr21	42792390	MX1	NM_001144925.2	TSS200	NA	30771223	II	Both	-	FALSE	TRUE
cg02205181_BC21	chr10	104154811	NFKB2	NM_001322935.1	TSSBody	NA	61706548	II	Both	-	FALSE	TRUE
cg02205181_TC21	chr10	104154811	NFKB2	NM_001322935.1	TSSBody	NA	72778876	II	Both	+	FALSE	TRUE
cg02248037_BC21	chr6	31465876	MICB	NM_001289161.2	TSS200	NA	87668470	II	Both	-	FALSE	TRUE
cg02254152_TC21	chr6	30295036	TRIM39	NM_001369522.1	TSSBody	NA	95745171	II	Both	+	FALSE	TRUE
cg02259877_TC21	chr6	33217421	HCG25	NR_044997.1	TSSBody	NA	76609529	II	Both	+	FALSE	TRUE
cg02270108_BO21	chr6	32938475	BRD2	NM_001113182.3	TSS1500	NA	1644914	II	Both	-	FALSE	TRUE
cg02270108_TC21	chr6	32938475	BRD2	NM_001113182.3	TSS1500	NA	51645527	II	Both	+	FALSE	TRUE
cg02279848_BC21	chr1	247578322	NLRP3	NM_001079821.2	TSS1500	NA	41683272	II	Both	-	FALSE	TRUE
cg02279848_TO21	chr1	247578322	NLRP3	NM_001079821.2	TSS1500	NA	55759843	II	Both	+	FALSE	TRUE
cg02279850_TC21	chr1	247578767	NLRP3	NM_001079821.2	TSS1500	NA	90707357	II	Both	+	FALSE	TRUE
cg02279851_TC21	chr1	247578795	NLRP3	NM_001079821.2	TSS1500	NA	89798204	II	Both	+	FALSE	TRUE
cg02279853_BC21	chr1	247578855	NLRP3	NM_001079821.2	TSS1500	NA	76611431	II	Both	-	FALSE	TRUE
cg02279853_BO21	chr1	247578855	NLRP3	NM_001079821.2	TSS1500	NA	69793836	II	Both	-	FALSE	TRUE
cg02279853_TO21	chr1	247578855	NLRP3	NM_001079821.2	TSS1500	NA	78763832	II	Both	+	FALSE	TRUE
cg02279854_TC21	chr1	247579024	NLRP3	NM_001079821.2	TSS1500	NA	9797267	II	Both	+	FALSE	TRUE
cg02279855_BC21	chr1	247579176	NLRP3	NM_001079821.2	TSS1500	NA	38664980	II	Both	-	FALSE	TRUE
cg02279855_TO21	chr1	247579176	NLRP3	NM_001079821.2	TSS1500	NA	45742833	II	Both	+	FALSE	TRUE
cg02279856_BC21	chr1	247579184	NLRP3	NM_001079821.2	TSS1500	NA	7756542	II	Both	-	FALSE	TRUE
cg02279856_TC21	chr1	247579184	NLRP3	NM_001079821.2	TSS1500	NA	79733121	II	Both	+	FALSE	TRUE
cg02279857_TC21	chr1	247579220	NLRP3	NM_001079821.2	TSS1500	NA	97700394	II	Both	+	FALSE	TRUE
cg02279880_TC21	chr1	247581474	NLRP3	NM_001079821.2	TSSBody	NA	85616218	II	Both	+	FALSE	TRUE
cg02279881_BC21	chr1	247581570	NLRP3	NM_001079821.2	TSSBody	NA	44701575	II	Both	-	FALSE	TRUE
cg02279890_BC21	chr1	247582115	NLRP3	NM_001079821.2	TSSBody	NA	2794284	II	Both	-	FALSE	TRUE
cg02279890_TC21	chr1	247582115	NLRP3	NM_001079821.2	TSSBody	NA	44730109	II	Both	+	FALSE	TRUE
cg02279892_BC21	chr1	247582221	NLRP3	NM_001079821.2	TSSBody	NA	76702903	II	Both	-	FALSE	TRUE
cg02280219_TC21	chr1	247605717	NLRP3	NM_001079821.2	TSSBody	NA	24780117	II	Both	+	FALSE	TRUE
cg02280219_TO21	chr1	247605717	NLRP3	NM_001079821.2	TSSBody	NA	81753179	II	Both	+	FALSE	TRUE
cg02280220_BC21	chr1	247605812	NLRP3	NM_001079821.2	TSSBody	NA	8800125	II	Both	-	FALSE	TRUE
cg02280220_TC21	chr1	247605812	NLRP3	NM_001079821.2	TSSBody	NA	99807428	II	Both	+	FALSE	TRUE
cg02280229_TC21	chr1	247606672	NLRP3	NM_001079821.2	TSSBody	NA	58777863	II	Both	+	FALSE	TRUE
cg02280231_TC21	chr1	247606712	NLRP3	NM_001079821.2	TSSBody	NA	70776868	II	Both	+	FALSE	TRUE
cg02280238_BO21	chr1	247607051	NLRP3	NM_001079821.2	TSSBody	NA	93688577	II	Both	-	FALSE	TRUE
cg02280238_TC21	chr1	247607051	NLRP3	NM_001079821.2	TSSBody	NA	59706103	II	Both	+	FALSE	TRUE
cg02280239_TC21	chr1	247607195	NLRP3	NM_001079821.2	TSSBody	NA	89725888	II	Both	+	FALSE	TRUE
cg02300308_TC21	chr6	32134270	EGFL8	NM_030652.4	TSSBody	NA	91609387	II	Both	+	FALSE	TRUE
cg02303399_BC21	chr1	153175248	LELP1	NM_001010857.3	TSS1500	NA	97695905	II	Both	-	FALSE	TRUE
cg02303399_BO21	chr1	153175248	LELP1	NM_001010857.3	TSS1500	NA	88688560	II	Both	-	FALSE	TRUE
cg02303399_TC21	chr1	153175248	LELP1	NM_001010857.3	TSS1500	NA	9713849	II	Both	+	FALSE	TRUE
cg02306936_TC21	chr6	30881316	VARS2	NM_001167733.2	TSS1500	NA	26725285	II	Both	+	FALSE	TRUE
cg02341058_BC21	chr1	152094977	NA	NA	NA	NA	11694260	II	Both	-	FALSE	TRUE
cg02341058_BO21	chr1	152094977	NA	NA	NA	NA	15645979	II	Both	-	FALSE	TRUE
cg02357491_BC21	chr6	31105744	PSORS1C1	NM_014068.3	TSSBody	NA	7664977	II	Both	-	FALSE	TRUE
cg02357491_BO21	chr6	31105744	PSORS1C1	NM_014068.3	TSSBody	NA	68618584	II	Both	-	FALSE	TRUE
cg02376496_TC21	chr6	30860175	DDR1	NM_001297652.1	TSSBody	NA	81807411	II	Both	+	FALSE	TRUE
cg02387583_BC21	chr6	32937621	BRD2	NM_001113182.3	TSS1500	NA	81747981	II	Both	-	FALSE	TRUE
cg02420130_BC21	chr15	74286415	PML	NM_033246.2	TSS1500	NA	97697293	II	Both	-	FALSE	TRUE
cg02420130_TO21	chr15	74286415	PML	NM_033246.2	TSS1500	NA	95606865	II	Both	+	FALSE	TRUE
cg02452732_BC21	chr17	41158611	IFI35	NM_001330230.2	TSS200	NA	45652523	II	Both	-	FALSE	TRUE
cg02452732_TO21	chr17	41158611	IFI35	NM_001330230.2	TSS200	NA	94739332	II	Both	+	FALSE	TRUE
cg02460426_BC21	chr6	32122147	LOC100507547	NR_037169.1	TSS200	NA	85680883	II	Both	-	FALSE	TRUE
cg02471378_BC21	chr6	32943025	BRD2	NM_005104.4	TSSBody	NA	93808930	II	Both	-	FALSE	TRUE
cg02475416_BC21	chr6	33175891	RING1	NM_002931.4	TSS1500	NA	80724506	II	Both	-	FALSE	TRUE
cg02482497_BC21	chr1	153610672	CHTOP	NM_001244664.1	TSSBody	NA	37617837	II	Both	-	FALSE	TRUE
cg02482497_TC21	chr1	153610672	CHTOP	NM_001244664.1	TSSBody	NA	81753499	II	Both	+	FALSE	TRUE
cg02493440_TC21	chr16	57023485	NLRC5	NM_001330552.2	TSSBody	NA	95608861	II	Both	+	FALSE	TRUE
cg02497902_BC21	chr19	10380810	ICAM1	NM_000201.3	TSS1500	NA	49753969	II	Both	-	FALSE	TRUE
cg02520020_TC21	chr11	57364890	SERPING1	NM_000062.3	TSS1500	NA	97804194	II	Both	+	FALSE	TRUE
cg02520020_TO21	chr11	57364890	SERPING1	NM_000062.3	TSS1500	NA	85683131	II	Both	+	FALSE	TRUE
cg02524941_TC21	chr6	33394326	SYNGAP1	NM_001130066.2	TSSBody	NA	20668890	II	Both	+	FALSE	TRUE
cg02531797_BC21	chr6	31588317	PRRC2A	NM_080686.3	TSS200	NA	65612543	II	Both	-	FALSE	TRUE
cg02563952_TC21	chr6	31707803	MSH5	NM_172165.3	TSSBody	NA	97757425	II	Both	+	FALSE	TRUE
cg02564596_TC1	chr2	25763672	DTNB	NM_001256304.2	TSSBody	15699195	26600927	I	Red	+	TRUE	TRUE
cg02567488_BO21	chr6	32822565	TAP1	NM_000593.5	TSS1500	NA	2739864	II	Both	-	FALSE	TRUE
cg02573566_BC21	chr1	153599479	S100A13	NM_001024210.2	TSSBody	NA	45754296	II	Both	-	FALSE	TRUE
cg02595098_BC1	chr2	27817482	ZNF512	NM_001271289.1	TSSBody	72614527	90706125	I	Red	-	TRUE	TRUE
cg02610906_BO21	chr16	57059749	NLRC5	NM_001330552.2	TSSBody	NA	35797536	II	Both	-	FALSE	TRUE
cg02610906_TC21	chr16	57059749	NLRC5	NM_001330552.2	TSSBody	NA	90723215	II	Both	+	FALSE	TRUE
cg02610906_TO21	chr16	57059749	NLRC5	NM_001330552.2	TSSBody	NA	92690838	II	Both	+	FALSE	TRUE
cg02652579_TC21	chr6	33386967	CUTA	NM_015921.3	TSS1500	NA	70683937	II	Both	+	FALSE	TRUE
cg02653117_TC21	chr6	32938824	BRD2	NM_005104.4	TSSBody	NA	55653905	II	Both	+	FALSE	TRUE
cg02663496_BC21	chr6	31105852	PSORS1C1	NM_014068.3	TSSBody	NA	75795419	II	Both	-	FALSE	TRUE
cg02680314_TC21	chr16	3097387	MMP25	NM_022468.5	TSSBody	NA	70694267	II	Both	+	FALSE	TRUE
cg02680487_BC21	chr6	30851529	DDR1	NM_001954.4	TSS1500	NA	40644544	II	Both	-	FALSE	TRUE
cg02692313_BC21	chr6	33048444	HLA-DPA1	NM_001242524.2	TSSBody	NA	62652541	II	Both	-	FALSE	TRUE
cg02695062_BC21	chr6	30851417	DDR1	NM_001954.4	TSS1500	NA	19758136	II	Both	-	FALSE	TRUE
cg02696067_BC21	chr6	30850977	DDR1	NM_001954.4	TSS1500	NA	88784314	II	Both	-	FALSE	TRUE
cg02700447_BC21	chr6	31591642	PRRC2A	NM_080686.3	TSSBody	NA	93788254	II	Both	-	FALSE	TRUE
cg02703032_BC21	chr6	32938830	BRD2	NM_005104.4	TSSBody	NA	24731886	II	Both	-	FALSE	TRUE
cg02705619_TC21	chr16	57059562	NLRC5	NM_001330552.2	TSSBody	NA	75607420	II	Both	+	FALSE	TRUE
cg02707277_BO21	chr6	32945906	BRD2	NM_005104.4	TSSBody	NA	25607566	II	Both	-	FALSE	TRUE
cg02707277_TC21	chr6	32945906	BRD2	NM_005104.4	TSSBody	NA	97633213	II	Both	+	FALSE	TRUE
cg02737149_BC21	chr6	31708032	MSH5	NM_172165.3	TSSBody	NA	64672275	II	Both	-	FALSE	TRUE
cg02744413_BC21	chr16	57060187	NLRC5	NM_001330552.2	TSSBody	NA	49700536	II	Both	-	FALSE	TRUE
cg02753826_BC21	chr11	119041910	NLRX1	NM_001282358.1	TSSBody	NA	68758199	II	Both	-	FALSE	TRUE
cg02769614_BC21	chr6	32135052	EGFL8	NM_030652.4	TSSBody	NA	99808323	II	Both	-	FALSE	TRUE
cg02772121_BC21	chr6	30130881	TRIM15	NM_033229.3	TSS1500	NA	3744828	II	Both	-	FALSE	TRUE
cg02778334_TC21	chr6	31864682	EHMT2	NM_006709.5	TSSBody	NA	9624546	II	Both	+	FALSE	TRUE
cg02786267_TC21	chr6	32708524	HLA-DQA2	NM_020056.5	TSS1500	NA	45692166	II	Both	+	FALSE	TRUE
cg02797183_BC21	chr1	153189521	PRR9	NM_001195571.2	TSS1500	NA	97681497	II	Both	-	FALSE	TRUE
cg02825296_TC21	chr1	152691483	C1orf68	NM_001024679.3	TSS1500	NA	2755341	II	Both	+	FALSE	TRUE
cg02867250_BC21	chr6	31107835	PSORS1C1	NM_014068.3	TSSBody	NA	48671827	II	Both	-	FALSE	TRUE
cg02867250_TO21	chr6	31107835	PSORS1C1	NM_014068.3	TSSBody	NA	77622357	II	Both	+	FALSE	TRUE
cg02879159_TC21	chr6	30135449	TRIM15	NM_033229.3	TSSBody	NA	95782393	II	Both	+	FALSE	TRUE
cg02879793_BC21	chr2	61107185	LINC01185	NR_033980.1	TSSBody	NA	72718980	II	Both	-	FALSE	TRUE
cg02879793_TO21	chr2	61107185	LINC01185	NR_033980.1	TSSBody	NA	48740950	II	Both	+	FALSE	TRUE
cg02879795_BC21	chr2	61107214	REL	NM_001291746.2	TSS1500	NA	69713520	II	Both	-	FALSE	TRUE
cg02879799_BC21	chr2	61107504	REL	NM_001291746.2	TSS1500	NA	84750228	II	Both	-	FALSE	TRUE
cg02879800_TC21	chr2	61107511	REL	NM_001291746.2	TSS1500	NA	97695330	II	Both	+	FALSE	TRUE
cg02879801_BC21	chr2	61107619	REL	NM_001291746.2	TSS1500	NA	87657549	II	Both	-	FALSE	TRUE
cg02879801_TC21	chr2	61107619	REL	NM_001291746.2	TSS1500	NA	46674933	II	Both	+	FALSE	TRUE
cg02879802_TC21	chr2	61107749	REL	NM_001291746.2	TSS1500	NA	34662841	II	Both	+	FALSE	TRUE
cg02879803_TC21	chr2	61107785	REL	NM_001291746.2	TSS1500	NA	6725842	II	Both	+	FALSE	TRUE
cg02879805_BO21	chr2	61107893	REL	NM_001291746.2	TSS1500	NA	81618410	II	Both	-	FALSE	TRUE
cg02879805_TC21	chr2	61107893	REL	NM_001291746.2	TSS1500	NA	24652975	II	Both	+	FALSE	TRUE
cg02879806_BC21	chr2	61107968	REL	NM_001291746.2	TSS1500	NA	27753578	II	Both	-	FALSE	TRUE
cg02879806_TC21	chr2	61107968	REL	NM_001291746.2	TSS1500	NA	68616231	II	Both	+	FALSE	TRUE
cg02879807_BC21	chr2	61108000	REL	NM_001291746.2	TSS1500	NA	43630211	II	Both	-	FALSE	TRUE
cg02879828_BC21	chr2	61108272	REL	NM_001291746.2	TSS1500	NA	3771301	II	Both	-	FALSE	TRUE
cg02879835_TC21	chr2	61108355	REL	NM_001291746.2	TSS1500	NA	31770879	II	Both	+	FALSE	TRUE
cg02880014_BC21	chr2	61121149	REL	NM_001291746.2	TSSBody	NA	41793833	II	Both	-	FALSE	TRUE
cg02880014_TC21	chr2	61121149	REL	NM_001291746.2	TSSBody	NA	78614176	II	Both	+	FALSE	TRUE
cg02880015_BC21	chr2	61121192	REL	NM_001291746.2	TSSBody	NA	46798112	II	Both	-	FALSE	TRUE
cg02880016_BC21	chr2	61121405	REL	NM_001291746.2	TSSBody	NA	41640134	II	Both	-	FALSE	TRUE
cg02888917_TC21	chr6	32940425	BRD2	NM_005104.4	TSSBody	NA	85692831	II	Both	+	FALSE	TRUE
cg02889647_BC21	chr1	152879586	IVL	NM_005547.3	TSS1500	NA	85698497	II	Both	-	FALSE	TRUE
cg02889647_TC21	chr1	152879586	IVL	NM_005547.3	TSS1500	NA	80754870	II	Both	+	FALSE	TRUE
cg02919982_BO21	chr1	153005121	SPRR1B	NM_003125.3	TSSBody	NA	94676894	II	Both	-	FALSE	TRUE
cg02919982_TO21	chr1	153005121	SPRR1B	NM_003125.3	TSSBody	NA	88794591	II	Both	+	TRUE	TRUE
cg02925581_TC21	chr21	42803740	MX1	NM_001144925.2	TSSBody	NA	45780111	II	Both	+	FALSE	TRUE
cg02936944_TC21	chr6	31168943	HCG27	NR_026791.1	TSSBody	NA	34764116	II	Both	+	FALSE	TRUE
cg02939958_BC21	chr6	33216457	HCG25	NR_044997.1	TSS1500	NA	62776527	II	Both	-	FALSE	TRUE
cg02939958_TO21	chr6	33216457	HCG25	NR_044997.1	TSS1500	NA	87729303	II	Both	+	FALSE	TRUE
cg02942965_BC21	chr6	30457081	HLA-E	NM_005516.6	TSS1500	NA	97629489	II	Both	-	FALSE	TRUE
cg02953039_BC21	chr6	32007916	CYP21A2	NM_001368144.1	TSSBody	NA	96659879	II	Both	-	FALSE	TRUE
cg02954111_BC21	chr6	31795116	HSPA1B	NM_005346.6	TSS1500	NA	85771284	II	Both	-	FALSE	TRUE
cg02954111_TC21	chr6	31795116	HSPA1B	NM_005346.6	TSS1500	NA	88619271	II	Both	+	FALSE	TRUE
cg02956248_TC21	chr6	32120901	LOC100507547	NR_037169.1	TSSBody	NA	62664243	II	Both	+	FALSE	TRUE
cg02971879_BC21	chr1	196706028	CFH	NM_000186.4	TSSBody	NA	20727934	II	Both	-	FALSE	TRUE
cg02971879_TC21	chr1	196706028	CFH	NM_000186.4	TSSBody	NA	61776880	II	Both	+	FALSE	TRUE
cg02973270_BO21	chr6	32146548	AGPAT1	NM_001371438.1	TSS1500	NA	29633147	II	Both	-	FALSE	TRUE
cg02973270_TC21	chr6	32146548	AGPAT1	NM_001371438.1	TSS1500	NA	45762859	II	Both	+	FALSE	TRUE
cg02980260_BC1	chr2	71769968	DYSF	NM_001130976.2	TSSBody	3686990	71688100	I	Red	-	TRUE	TRUE
cg02988397_BC21	chr15	45007647	B2M	NM_004048.3	TSSBody	NA	8753295	II	Both	-	FALSE	TRUE
cg02988397_TC21	chr15	45007647	B2M	NM_004048.3	TSSBody	NA	9716433	II	Both	+	FALSE	TRUE
cg03007907_BC21	chr9	139793832	TRAF2	NM_021138.4	TSSBody	NA	52730540	II	Both	-	FALSE	TRUE
cg03007907_TC21	chr9	139793832	TRAF2	NM_021138.4	TSSBody	NA	3636383	II	Both	+	FALSE	TRUE
cg03010186_BC21	chr6	32122528	LOC100507547	NR_037169.1	TSS1500	NA	60724574	II	Both	-	FALSE	TRUE
cg03010186_BO21	chr6	32122528	LOC100507547	NR_037169.1	TSS1500	NA	6625173	II	Both	-	FALSE	TRUE
cg03010186_TC21	chr6	32122528	LOC100507547	NR_037169.1	TSS1500	NA	5643868	II	Both	+	FALSE	TRUE
cg03012115_TC21	chr6	33216271	HCG25	NR_044997.1	TSS1500	NA	52740992	II	Both	+	FALSE	TRUE
cg03029752_TC21	chr11	119038708	NLRX1	NM_001282358.1	TSS1500	NA	68741973	II	Both	+	FALSE	TRUE
cg03030317_BC21	chr6	31164924	HCG27	NR_026791.1	TSS1500	NA	4761420	II	Both	-	FALSE	TRUE
cg03034365_BC21	chr6	31105872	PSORS1C1	NM_014068.3	TSSBody	NA	28784820	II	Both	-	FALSE	TRUE
cg03037030_TC21	chr6	31543300	TNF	NM_000594.4	TSS200	NA	76720561	II	Both	+	FALSE	TRUE
cg03037740_BC21	chr6	33176666	RING1	NM_002931.4	TSSBody	NA	93653407	II	Both	-	FALSE	TRUE
cg03077751_BC21	chr6	32937207	BRD2	NM_001113182.3	TSS1500	NA	61798184	II	Both	-	FALSE	TRUE
cg03077751_TC21	chr6	32937207	BRD2	NM_001113182.3	TSS1500	NA	68632139	II	Both	+	FALSE	TRUE
cg03085696_BC21	chr6	30901598	NA	NA	NA	NA	97624422	II	Both	-	FALSE	TRUE
cg03085696_TC21	chr6	30901598	NA	NA	NA	NA	92661499	II	Both	+	FALSE	TRUE
cg03094134_BC21	chr6	30297174	TRIM39	NM_001369522.1	TSSBody	NA	70701520	II	Both	-	FALSE	TRUE
cg03101645_BC21	chr20	12989700	SPTLC3	NM_001349945.2	TSSBody	NA	64671833	II	Both	-	FALSE	TRUE
cg03101645_TC21	chr20	12989700	SPTLC3	NM_001349945.2	TSSBody	NA	79741228	II	Both	+	FALSE	TRUE
cg03102031_BC21	chr1	152757457	LCE1E	NM_178353.2	TSS1500	NA	26724569	II	Both	-	FALSE	TRUE
cg03102031_TC21	chr1	152757457	LCE1E	NM_178353.2	TSS1500	NA	88694238	II	Both	+	FALSE	TRUE
cg03105070_TC21	chr6	31105844	PSORS1C1	NM_014068.3	TSSBody	NA	72654898	II	Both	+	FALSE	TRUE
cg03108777_TC21	chr6	31169142	HCG27	NR_026791.1	TSSBody	NA	88772931	II	Both	+	FALSE	TRUE
cg03130533_TC21	chr6	30688665	TUBB	NM_001293214.2	TSSBody	NA	97685371	II	Both	+	FALSE	TRUE
cg03134653_TC21	chr6	31600558	PRRC2A	NM_080686.3	TSSBody	NA	87749866	II	Both	+	FALSE	TRUE
cg03146965_BC21	chr6	31864071	EHMT2	NM_006709.5	TSSBody	NA	61805522	II	Both	-	FALSE	TRUE
cg03146965_BO21	chr6	31864071	EHMT2	NM_006709.5	TSSBody	NA	52754159	II	Both	-	FALSE	TRUE
cg03151709_BC21	chr6	30686511	MDC1	NM_014641.3	TSS1500	NA	69666929	II	Both	-	FALSE	TRUE
cg03151709_TC21	chr6	30686511	MDC1	NM_014641.3	TSS1500	NA	42627954	II	Both	+	FALSE	TRUE
cg03155896_BC21	chr6	30879000	GTF2H4	NM_001517.5	TSSBody	NA	48799112	II	Both	-	FALSE	TRUE
cg03157610_BC21	chr6	33377317	PHF1	NM_002636.5	TSS1500	NA	46624285	II	Both	-	FALSE	TRUE
cg03200136_BC21	chr6	33405517	SYNGAP1	NM_001130066.2	TSSBody	NA	76622908	II	Both	-	FALSE	TRUE
cg03200136_TC21	chr6	33405517	SYNGAP1	NM_001130066.2	TSSBody	NA	68653586	II	Both	+	FALSE	TRUE
cg03200136_TO21	chr6	33405517	SYNGAP1	NM_001130066.2	TSSBody	NA	29665132	II	Both	+	FALSE	TRUE
cg03201507_TC21	chr6	32940060	BRD2	NM_005104.4	TSSBody	NA	79750505	II	Both	+	FALSE	TRUE
cg03215005_TC21	chr21	42792304	MX1	NM_001144925.2	TSS200	NA	94757566	II	Both	+	FALSE	TRUE
cg03215160_TC21	chr6	29424926	OR2H1	NM_001318022.1	TSS200	NA	71629821	II	Both	+	FALSE	TRUE
cg03217090_TC21	chr6	31600351	PRRC2A	NM_080686.3	TSSBody	NA	15694589	II	Both	+	FALSE	TRUE
cg03217090_TO21	chr6	31600351	PRRC2A	NM_080686.3	TSSBody	NA	57749283	II	Both	+	FALSE	TRUE
cg03226054_BC21	chr6	30907401	MUCL3	NM_080870.4	TSS1500	NA	85743499	II	Both	-	FALSE	TRUE
cg03226993_TC1	chr6	30457968	HLA-E	NM_005516.6	TSSBody	97711988	28668537	I	Red	+	FALSE	TRUE
cg03229061_BC1	chr6	33048483	HLA-DPA1	NM_001242524.2	TSSBody	41777130	28798855	I	Grn	-	FALSE	TRUE
cg03229061_TC1	chr6	33048483	HLA-DPA1	NM_001242524.2	TSSBody	13703289	92804953	I	Red	+	FALSE	TRUE
cg03229061_TC21	chr6	33048483	HLA-DPA1	NM_001242524.2	TSSBody	NA	81777329	II	Both	+	FALSE	TRUE
cg03242458_BC21	chr6	30135644	TRIM15	NM_033229.3	TSSBody	NA	43759549	II	Both	-	FALSE	TRUE
cg03270204_TC21	chr6	30851638	DDR1	NM_001954.4	TSS1500	NA	6753579	II	Both	+	FALSE	TRUE
cg03276956_BC21	chr6	30034558	PPP1R11	NM_021959.3	TSS1500	NA	6623209	II	Both	-	FALSE	TRUE
cg03299066_TC21	chr6	32821617	TAP1	NM_000593.5	TSSBody	NA	61789561	II	Both	+	FALSE	TRUE
cg03342114_BC21	chr19	10381577	ICAM1	NM_000201.3	TSS1500	NA	43604855	II	Both	-	FALSE	TRUE
cg03354376_BC21	chr6	31371103	MICA	NM_001289154.2	TSSBody	NA	68653926	II	Both	-	FALSE	TRUE
cg03361297_BC1	chr6	29976906	ZNRD1ASP	NR_026751.2	TSSBody	76601489	57781593	I	Red	-	FALSE	TRUE
cg03368908_BC21	chr11	57378693	SERPING1	NM_000062.3	TSSBody	NA	69798234	II	Both	-	FALSE	TRUE
cg03369055_TC21	chr6	33395420	SYNGAP1	NM_001130066.2	TSSBody	NA	2667847	II	Both	+	FALSE	TRUE
cg03380860_BO21	chr20	13107266	SPTLC3	NM_001349945.2	TSSBody	NA	43734212	II	Both	-	FALSE	TRUE
cg03380860_TC21	chr20	13107266	SPTLC3	NM_001349945.2	TSSBody	NA	76765239	II	Both	+	FALSE	TRUE
cg03399814_BC21	chr6	31592041	PRRC2A	NM_080686.3	TSSBody	NA	86753162	II	Both	-	FALSE	TRUE
cg03413835_BO21	chr6	33394537	SYNGAP1	NM_001130066.2	TSSBody	NA	20648213	II	Both	-	FALSE	TRUE
cg03413835_TC21	chr6	33394537	SYNGAP1	NM_001130066.2	TSSBody	NA	41754962	II	Both	+	FALSE	TRUE
cg03419151_BC21	chr17	6658728	XAF1	NM_001353140.2	TSS1500	NA	7706121	II	Both	-	FALSE	TRUE
cg03419151_BO21	chr17	6658728	XAF1	NM_001353140.2	TSS1500	NA	2663375	II	Both	-	FALSE	TRUE
cg03425812_BC21	chr15	45005363	B2M	NM_004048.3	TSSBody	NA	92707171	II	Both	-	FALSE	TRUE
cg03431846_TC21	chr14	24641183	REC8	NM_005132.3	TSS200	NA	8659292	II	Both	+	FALSE	TRUE
cg03433870_BC21	chr16	11034092	DEXI	NM_014015.4	TSSBody	NA	92672384	II	Both	-	FALSE	TRUE
cg03434432_BC21	chr6	32122393	LOC100507547	NR_037169.1	TSS1500	NA	44784594	II	Both	-	FALSE	TRUE
cg03462677_BC21	chr6	31165452	HCG27	NR_026791.1	TSS200	NA	58718820	II	Both	-	FALSE	TRUE
cg03465320_TC21	chr6	32823078	TAP1	NM_000593.5	TSS1500	NA	76647872	II	Both	+	FALSE	TRUE
cg03465714_BC21	chr1	152285911	FLG	NM_002016.2	TSSBody	NA	66601175	II	Both	-	FALSE	TRUE
cg03490138_TC21	chr12	6553843	CD27-AS1	NR_015382.2	TSSBody	NA	72769941	II	Both	+	FALSE	TRUE
cg03529043_BC21	chr6	31021134	HCG22	NR_145427.1	TSS200	NA	87629451	II	Both	-	FALSE	TRUE
cg03529043_BO21	chr6	31021134	HCG22	NR_145427.1	TSS200	NA	65622888	II	Both	-	FALSE	TRUE
cg03532223_TC21	chr6	32935858	BRD2	NM_005104.4	TSS1500	NA	9682444	II	Both	+	FALSE	TRUE
cg03532223_TO21	chr6	32935858	BRD2	NM_005104.4	TSS1500	NA	20806846	II	Both	+	FALSE	TRUE
cg03564455_BC21	chr6	29274096	OR14J1	NM_030946.1	TSS1500	NA	92671836	II	Both	-	FALSE	TRUE
cg03564455_TC21	chr6	29274096	OR14J1	NM_030946.1	TSS1500	NA	86703215	II	Both	+	FALSE	TRUE
cg03570577_BC1	chr6	29765324	HLA-V	NR_132323.1	TSSBody	95666428	19775542	I	Red	-	FALSE	TRUE
cg03570577_TC1	chr6	29765324	HLA-V	NR_132323.1	TSSBody	40787904	51798962	I	Red	+	FALSE	TRUE
cg03591350_BC21	chr1	151990514	NBPF18P	NR_103561.1	TSS1500	NA	64770174	II	Both	-	FALSE	TRUE
cg03591350_TC21	chr1	151990514	NBPF18P	NR_103561.1	TSS1500	NA	80742332	II	Both	+	FALSE	TRUE
cg03593812_BC21	chr6	33382862	PHF1	NM_002636.5	TSSBody	NA	85793122	II	Both	-	FALSE	TRUE
cg03607951_TC21	chr1	79085586	IFI44L	NM_006820.4	TSS1500	NA	5738222	II	Both	+	FALSE	TRUE
cg03607951_TO21	chr1	79085586	IFI44L	NM_006820.4	TSS1500	NA	55797184	II	Both	+	FALSE	TRUE
cg03625897_BC21	chr6	31587864	PRRC2A	NM_080686.3	TSS1500	NA	44658267	II	Both	-	FALSE	TRUE
cg03625897_TC21	chr6	31587864	PRRC2A	NM_080686.3	TSS1500	NA	84777256	II	Both	+	FALSE	TRUE
cg03664893_BC21	chr6	31903780	C2	NM_001282457.2	TSSBody	NA	41716201	II	Both	-	FALSE	TRUE
cg03664893_BO21	chr6	31903780	C2	NM_001282457.2	TSSBody	NA	14639550	II	Both	-	FALSE	TRUE
cg03664893_TC21	chr6	31903780	C2	NM_001282457.2	TSSBody	NA	61723988	II	Both	+	FALSE	TRUE
cg03665259_BO21	chr6	31021826	HCG22	NR_145427.1	TSSBody	NA	78806213	II	Both	-	FALSE	TRUE
cg03665259_TC21	chr6	31021826	HCG22	NR_145427.1	TSSBody	NA	9690120	II	Both	+	FALSE	TRUE
cg03693749_TC1	chr6	33085470	HLA-DPB2	NR_001435.2	TSSBody	88642238	97786321	I	Red	+	FALSE	TRUE
cg03697570_TC21	chr6	33358411	KIFC1	NM_002263.4	TSS1500	NA	27692118	II	Both	+	FALSE	TRUE
cg03731673_BC21	chr6	33393599	SYNGAP1	NM_001130066.2	TSSBody	NA	71744910	II	Both	-	FALSE	TRUE
cg03739609_BC21	chr6	31555016	LST1	NM_205838.3	TSSBody	NA	3738449	II	Both	-	FALSE	TRUE
cg03739609_TC21	chr6	31555016	LST1	NM_205838.3	TSSBody	NA	71716563	II	Both	+	FALSE	TRUE
cg03754428_TC21	chr16	57075229	NLRC5	NM_001330552.2	TSSBody	NA	98622454	II	Both	+	FALSE	TRUE
cg03755226_BO21	chr6	31707667	MSH5	NM_172165.3	TSS200	NA	23618218	II	Both	-	FALSE	TRUE
cg03755226_TC21	chr6	31707667	MSH5	NM_172165.3	TSS200	NA	63725836	II	Both	+	FALSE	TRUE
cg03758774_BC21	chr6	32936478	BRD2	NM_005104.4	TSSBody	NA	67685861	II	Both	-	FALSE	TRUE
cg03825488_BC21	chr6	30885460	VARS2	NM_001167733.2	TSSBody	NA	75718870	II	Both	-	FALSE	TRUE
cg03869743_BC21	chr6	30034645	PPP1R11	NM_021959.3	TSS1500	NA	49704284	II	Both	-	FALSE	TRUE
cg03869743_TC21	chr6	30034645	PPP1R11	NM_021959.3	TSS1500	NA	90762965	II	Both	+	FALSE	TRUE
cg03873511_BC21	chr19	10380754	ICAM1	NM_000201.3	TSS1500	NA	45672594	II	Both	-	FALSE	TRUE
cg03873511_TC21	chr19	10380754	ICAM1	NM_000201.3	TSS1500	NA	87740122	II	Both	+	FALSE	TRUE
cg03878435_BC21	chr6	33111074	HCG24	NR_138084.1	TSS200	NA	68652965	II	Both	-	FALSE	TRUE
cg03878435_BO21	chr6	33111074	HCG24	NR_138084.1	TSS200	NA	25613214	II	Both	-	FALSE	TRUE
cg03878435_TC21	chr6	33111074	HCG24	NR_138084.1	TSS200	NA	81769831	II	Both	+	FALSE	TRUE
cg03891808_TC21	chr6	31630422	GPANK1	NM_033177.4	TSSBody	NA	53792963	II	Both	+	FALSE	TRUE
cg03895692_BC21	chr6	29003956	LOC100129636	NR_125387.1	TSSBody	NA	67653121	II	Both	-	FALSE	TRUE
cg03923227_BC21	chr6	31691050	MPIG6B	NM_138275.2	TSS200	NA	97731533	II	Both	-	FALSE	TRUE
cg03935949_BC1	chr2	192006501	STAT4	NM_001243835.2	TSSBody	84740933	67772238	I	Grn	-	TRUE	TRUE
cg03943025_TC1	chr6	33084549	HLA-DPB2	NR_001435.2	TSSBody	2781214	2604446	I	Red	+	FALSE	TRUE
cg03948609_BC21	chr6	30136085	TRIM15	NM_033229.3	TSSBody	NA	61711258	II	Both	-	FALSE	TRUE
cg03948609_TC21	chr6	30136085	TRIM15	NM_033229.3	TSSBody	NA	90780370	II	Both	+	FALSE	TRUE
cg03960217_TO1	chr1	152647777	LCE2C	NM_178429.3	TSS200	21762581	45727885	I	Grn	+	TRUE	TRUE
cg03960217_TO21	chr1	152647777	LCE2C	NM_178429.3	TSS200	NA	99631942	II	Both	+	TRUE	TRUE
cg03990811_BC21	chr6	31371318	MICA	NM_001289154.2	TSSBody	NA	1725237	II	Both	-	FALSE	TRUE
cg04005434_BC21	chr19	45504494	RELB	NM_006509.4	TSS1500	NA	52737264	II	Both	-	FALSE	TRUE
cg04005434_TC21	chr19	45504494	RELB	NM_006509.4	TSS1500	NA	60768564	II	Both	+	FALSE	TRUE
cg04021562_BO21	chr6	31845527	SLC44A4	NM_001178044.1	TSSBody	NA	50759203	II	Both	-	FALSE	TRUE
cg04021562_TC21	chr6	31845527	SLC44A4	NM_001178044.1	TSSBody	NA	16606256	II	Both	+	FALSE	TRUE
cg04054303_BC1	chr6	32606445	HLA-DQA1	NM_002122.5	TSSBody	59642160	68606582	I	Grn	-	FALSE	TRUE
cg04059338_TC21	chr13	108922375	TNFSF13B	NM_001145645.2	TSSBody	NA	9652575	II	Both	+	FALSE	TRUE
cg04077668_BC21	chr1	153600064	S100A13	NM_001024210.2	TSSBody	NA	41675114	II	Both	-	FALSE	TRUE
cg04105091_BC21	chr6	32121355	LOC100507547	NR_037169.1	TSSBody	NA	75758234	II	Both	-	FALSE	TRUE
cg04115366_BC21	chr17	6663802	XAF1	NM_001353135.1	TSSBody	NA	52782240	II	Both	-	FALSE	TRUE
cg04115366_BO21	chr17	6663802	XAF1	NM_001353135.1	TSSBody	NA	65677218	II	Both	-	FALSE	TRUE
cg04115366_TC21	chr17	6663802	XAF1	NM_001353135.1	TSSBody	NA	66712282	II	Both	+	FALSE	TRUE
cg04125972_TC21	chr5	40936418	C7	NM_000587.4	TSSBody	NA	58697579	II	Both	+	FALSE	TRUE
cg04138756_BC21	chr1	152973849	SPRR3	NM_005416.2	TSS1500	NA	81655940	II	Both	-	FALSE	TRUE
cg04143539_TC21	chr6	30614650	C6orf136	NM_145029.4	TSS1500	NA	9623472	II	Both	+	FALSE	TRUE
cg04173139_BC21	chr6	31601385	PRRC2A	NM_080686.3	TSSBody	NA	33707882	II	Both	-	FALSE	TRUE
cg04178207_BC21	chr6	30878437	GTF2H4	NM_001517.5	TSSBody	NA	22621151	II	Both	-	FALSE	TRUE
cg04178207_TC21	chr6	30878437	GTF2H4	NM_001517.5	TSSBody	NA	94775205	II	Both	+	FALSE	TRUE
cg04186657_TC21	chr6	29690893	HLA-F	NM_018950.2	TSS1500	NA	59647538	II	Both	+	FALSE	TRUE
cg04191297_TC21	chr6	33359192	KIFC1	NM_002263.4	TSS1500	NA	68639284	II	Both	+	FALSE	TRUE
cg04217471_BC21	chr12	6895978	NA	NA	NA	NA	94609488	II	Both	-	FALSE	TRUE
cg04217471_TC21	chr12	6895978	NA	NA	NA	NA	97710848	II	Both	+	FALSE	TRUE
cg04223697_BC21	chr10	104159643	NFKB2	NM_001322935.1	TSSBody	NA	58749228	II	Both	-	FALSE	TRUE
cg04253671_BC21	chr14	103338122	TRAF3	NM_001199427.2	TSSBody	NA	93690589	II	Both	-	FALSE	TRUE
cg04253671_TC21	chr14	103338122	TRAF3	NM_001199427.2	TSSBody	NA	2600566	II	Both	+	FALSE	TRUE
cg04257745_BC21	chr6	31591482	PRRC2A	NM_080686.3	TSSBody	NA	53767880	II	Both	-	FALSE	TRUE
cg04257745_TO21	chr6	31591482	PRRC2A	NM_080686.3	TSSBody	NA	98784376	II	Both	+	FALSE	TRUE
cg04290620_TC21	chr17	6665000	XAF1	NM_001353135.1	TSSBody	NA	59700297	II	Both	+	FALSE	TRUE
cg04290620_TO21	chr17	6665000	XAF1	NM_001353135.1	TSSBody	NA	55806546	II	Both	+	FALSE	TRUE
cg04294331_TC21	chr6	32133978	EGFL8	NM_030652.4	TSSBody	NA	97744366	II	Both	+	FALSE	TRUE
cg04302946_TC21	chr6	33386168	CUTA	NM_015921.3	TSS1500	NA	44781293	II	Both	+	FALSE	TRUE
cg04305858_BC21	chr6	30457182	HLA-E	NM_005516.6	TSS200	NA	49664280	II	Both	-	FALSE	TRUE
cg04305858_BO21	chr6	30457182	HLA-E	NM_005516.6	TSS200	NA	99797178	II	Both	-	FALSE	TRUE
cg04305858_TC21	chr6	30457182	HLA-E	NM_005516.6	TSS200	NA	58724556	II	Both	+	FALSE	TRUE
cg04312107_TC21	chr6	33167310	RXRB	NM_001291989.1	TSSBody	NA	20762148	II	Both	+	FALSE	TRUE
cg04314650_BC21	chr1	153609084	CHTOP	NM_001244664.1	TSSBody	NA	80663861	II	Both	-	FALSE	TRUE
cg04314650_TC21	chr1	153609084	CHTOP	NM_001244664.1	TSSBody	NA	29668972	II	Both	+	FALSE	TRUE
cg04315646_BC1	chr6	33084922	HLA-DPB2	NR_001435.2	TSSBody	71640906	76670312	I	Red	-	FALSE	TRUE
cg04347230_BC21	chr6	31723603	MSH5	NM_172165.3	TSSBody	NA	93661176	II	Both	-	FALSE	TRUE
cg04381081_BC21	chr19	56510013	NLRP5	NM_153447.4	TSS1500	NA	18664147	II	Both	-	FALSE	TRUE
cg04397817_TC21	chr6	31591343	PRRC2A	NM_080686.3	TSSBody	NA	71621102	II	Both	+	FALSE	TRUE
cg04420786_TC1	chr6	29908374	NA	NA	NA	60646171	9767235	I	Red	+	FALSE	TRUE
cg04423542_BC21	chr6	30293581	TRIM39	NM_001369522.1	TSS1500	NA	88629851	II	Both	-	FALSE	TRUE
cg04466273_BC21	chr12	64845556	TBK1	NM_013254.4	TSS1500	NA	90627182	II	Both	-	FALSE	TRUE
cg04466273_TO21	chr12	64845556	TBK1	NM_013254.4	TSS1500	NA	68722893	II	Both	+	FALSE	TRUE
cg04493778_TC1	chr6	32713018	HLA-DQA2	NM_020056.5	TSSBody	7740418	98664157	I	Red	+	FALSE	TRUE
cg04493778_TO1	chr6	32713018	HLA-DQA2	NM_020056.5	TSSBody	75703112	23754558	I	Grn	+	TRUE	TRUE
cg04493778_TO21	chr6	32713018	HLA-DQA2	NM_020056.5	TSSBody	NA	21686260	II	Both	+	TRUE	TRUE
cg04502390_BC21	chr9	120466347	TLR4	NM_138557.3	TSS1500	NA	85638396	II	Both	-	FALSE	TRUE
cg04502390_TC21	chr9	120466347	TLR4	NM_138557.3	TSS1500	NA	76668955	II	Both	+	FALSE	TRUE
cg04517643_BC21	chr6	30878530	GTF2H4	NM_001517.5	TSSBody	NA	71733924	II	Both	-	FALSE	TRUE
cg04528217_BC21	chr6	32122484	LOC100507547	NR_037169.1	TSS1500	NA	77695887	II	Both	-	FALSE	TRUE
cg04551914_BC21	chr6	29428676	OR2H1	NM_001318022.1	TSSBody	NA	19784905	II	Both	-	FALSE	TRUE
cg04557868_TC21	chr2	61107981	REL	NM_001291746.2	TSS1500	NA	74633929	II	Both	+	FALSE	TRUE
cg04568823_BC21	chr6	29767977	NA	NA	NA	NA	75797242	II	Both	-	FALSE	TRUE
cg04572540_BC21	chr6	30908739	MUCL3	NM_080870.4	TSS200	NA	75723341	II	Both	-	FALSE	TRUE
cg04572540_BO21	chr6	30908739	MUCL3	NM_080870.4	TSS200	NA	59807290	II	Both	-	FALSE	TRUE
cg04573510_TC21	chr6	31707458	MSH5	NM_172165.3	TSS1500	NA	9716402	II	Both	+	FALSE	TRUE
cg04580300_TC21	chr6	30205478	HCG17	NR_052012.1	TSSBody	NA	78716125	II	Both	+	FALSE	TRUE
cg04607679_TC21	chr6	32935803	BRD2	NM_005104.4	TSS1500	NA	88758141	II	Both	+	FALSE	TRUE
cg04607679_TO21	chr6	32935803	BRD2	NM_005104.4	TSS1500	NA	98657224	II	Both	+	FALSE	TRUE
cg04660374_TC1	chr3	24422434	THRB	NM_001354708.2	TSSBody	97617476	81639479	I	Red	+	TRUE	TRUE
cg04671518_BC21	chr12	64845608	TBK1	NM_013254.4	TSS1500	NA	94777544	II	Both	-	FALSE	TRUE
cg04671518_TO21	chr12	64845608	TBK1	NM_013254.4	TSS1500	NA	77772168	II	Both	+	FALSE	TRUE
cg04683891_BC21	chr6	30453500	NA	NA	NA	NA	6783260	II	Both	-	FALSE	TRUE
cg04710276_BC21	chr6	31164994	HCG27	NR_026791.1	TSS1500	NA	7710405	II	Both	-	FALSE	TRUE
cg04710641_BC21	chr6	31928257	SKIV2L	NM_006929.5	TSSBody	NA	98767879	II	Both	-	FALSE	TRUE
cg04717959_TC1	chr6	33052111	HLA-DPB1	NM_002121.6	TSSBody	92802253	93794475	I	Grn	+	FALSE	TRUE
cg04729768_TC21	chr6	31595653	PRRC2A	NM_080686.3	TSSBody	NA	38664836	II	Both	+	FALSE	TRUE
cg04744301_TC21	chr6	31936154	SKIV2L	NM_006929.5	TSSBody	NA	2668395	II	Both	+	FALSE	TRUE
cg04749507_BC21	chr6	32120203	PRRT1	NM_001363780.1	TSSBody	NA	4743597	II	Both	-	FALSE	TRUE
cg04749507_BO21	chr6	32120203	PRRT1	NM_001363780.1	TSSBody	NA	85666157	II	Both	-	FALSE	TRUE
cg04755954_BC21	chr1	152691297	C1orf68	NM_001024679.3	TSS1500	NA	2603982	II	Both	-	FALSE	TRUE
cg04762213_TC21	chr6	31587888	PRRC2A	NM_080686.3	TSS1500	NA	67663248	II	Both	+	FALSE	TRUE
cg04772947_TC21	chr11	57363540	NA	NA	NA	NA	3754339	II	Both	+	FALSE	TRUE
cg04772947_TO21	chr11	57363540	NA	NA	NA	NA	64777887	II	Both	+	FALSE	TRUE
cg04785007_BC21	chr19	56369416	NLRP4	NM_134444.5	TSSBody	NA	5798871	II	Both	-	FALSE	TRUE
cg04798369_BC21	chr6	32935521	BRD2	NM_005104.4	TSS1500	NA	90769206	II	Both	-	FALSE	TRUE
cg04798369_TC21	chr6	32935521	BRD2	NM_005104.4	TSS1500	NA	87668844	II	Both	+	FALSE	TRUE
cg04799664_TC21	chr16	57053850	NLRC5	NM_001330552.2	TSSBody	NA	7697323	II	Both	+	FALSE	TRUE
cg04802302_BC21	chr6	33395290	SYNGAP1	NM_001130066.2	TSSBody	NA	59689520	II	Both	-	FALSE	TRUE
cg04802801_BC21	chr6	30034711	PPP1R11	NM_021959.3	TSS1500	NA	21744870	II	Both	-	FALSE	TRUE
cg04805131_BC21	chr1	158978812	IFI16	NM_001206567.2	TSS1500	NA	79706238	II	Both	-	FALSE	TRUE
cg04805131_TC21	chr1	158978812	IFI16	NM_001206567.2	TSS1500	NA	37730986	II	Both	+	FALSE	TRUE
cg04807188_TC21	chr6	30457039	HLA-E	NM_005516.6	TSS1500	NA	70804162	II	Both	+	FALSE	TRUE
cg04846720_BC21	chr14	103295640	TRAF3	NM_001199427.2	TSSBody	NA	50723954	II	Both	-	FALSE	TRUE
cg04846720_TO21	chr14	103295640	TRAF3	NM_001199427.2	TSSBody	NA	87716850	II	Both	+	FALSE	TRUE
cg04873698_BC21	chr6	33306706	NA	NA	NA	NA	60704982	II	Both	-	FALSE	TRUE
cg04873698_TO21	chr6	33306706	NA	NA	NA	NA	84741573	II	Both	+	FALSE	TRUE
cg04877280_BC21	chr6	32122738	LOC100507547	NR_037169.1	TSS1500	NA	5797955	II	Both	-	FALSE	TRUE
cg04883847_BC1	chr3	49564924	DAG1	NM_001177643.2	TSSBody	91722820	41692208	I	Red	-	TRUE	TRUE
cg04885678_TC21	chr6	33046344	HLA-DPA1	NM_001242524.2	TSSBody	NA	16692172	II	Both	+	FALSE	TRUE
cg04896295_TC21	chr6	33388054	SYNGAP1	NM_001130066.2	TSSBody	NA	92616499	II	Both	+	FALSE	TRUE
cg04911821_TC21	chr12	6492579	LTBR	NM_001270987.2	TSSBody	NA	34725949	II	Both	+	FALSE	TRUE
cg04945153_TC21	chr6	31914068	CFB	NM_001710.6	TSSBody	NA	91762956	II	Both	+	FALSE	TRUE
cg04965412_BC1	chr3	56618578	CCDC66	NM_001012506.5	TSSBody	26794175	98767527	I	Grn	-	TRUE	TRUE
cg05023116_BC21	chr19	56510892	NLRP5	NM_153447.4	TSS200	NA	93804339	II	Both	-	FALSE	TRUE
cg05023116_TC21	chr19	56510892	NLRP5	NM_153447.4	TSS200	NA	5805575	II	Both	+	FALSE	TRUE
cg05037488_TC21	chr6	33395495	SYNGAP1	NM_001130066.2	TSSBody	NA	44755207	II	Both	+	FALSE	TRUE
cg05051142_BC21	chr6	33387205	CUTA	NM_015921.3	TSS1500	NA	46657185	II	Both	-	FALSE	TRUE
cg05051142_BO21	chr6	33387205	CUTA	NM_015921.3	TSS1500	NA	38624239	II	Both	-	FALSE	TRUE
cg05057014_BC21	chr6	30034882	PPP1R11	NM_021959.3	TSS200	NA	58711972	II	Both	-	FALSE	TRUE
cg05074892_BC21	chr6	32939292	BRD2	NM_005104.4	TSSBody	NA	50654898	II	Both	-	FALSE	TRUE
cg05074892_TO21	chr6	32939292	BRD2	NM_005104.4	TSSBody	NA	84808123	II	Both	+	FALSE	TRUE
cg05075708_BC21	chr6	32940440	BRD2	NM_005104.4	TSSBody	NA	93694931	II	Both	-	FALSE	TRUE
cg05076289_BC21	chr19	13049269	CALR	NM_004343.3	TSS200	NA	88672212	II	Both	-	FALSE	TRUE
cg05076289_TC21	chr19	13049269	CALR	NM_004343.3	TSS200	NA	93691427	II	Both	+	FALSE	TRUE
cg05103231_TC21	chr6	30881664	VARS2	NM_001167733.2	TSS1500	NA	93805252	II	Both	+	FALSE	TRUE
cg05111146_BC21	chr6	32935025	BRD2	NM_005104.4	TSS1500	NA	25742847	II	Both	-	FALSE	TRUE
cg05111146_BO21	chr6	32935025	BRD2	NM_005104.4	TSS1500	NA	16774183	II	Both	-	FALSE	TRUE
cg05111645_TC21	chr6	29427519	OR2H1	NM_001318022.1	TSSBody	NA	59642130	II	Both	+	FALSE	TRUE
cg05113688_TC21	chr14	103296121	TRAF3	NM_001199427.2	TSSBody	NA	9789206	II	Both	+	FALSE	TRUE
cg05115162_TC21	chr6	32811701	PSMB8-AS1	NR_037176.1	TSS200	NA	87706550	II	Both	+	FALSE	TRUE
cg05135714_TO21	chr6	32812165	PSMB8-AS1	NR_037176.1	TSSBody	NA	10689856	II	Both	+	FALSE	TRUE
cg05154222_TC21	chr16	57067229	NLRC5	NM_001330552.2	TSSBody	NA	2790141	II	Both	+	FALSE	TRUE
cg05176844_BC21	chr6	31168558	HCG27	NR_026791.1	TSSBody	NA	24711231	II	Both	-	FALSE	TRUE
cg05181025_BC21	chr6	33393662	SYNGAP1	NM_001130066.2	TSSBody	NA	91632307	II	Both	-	FALSE	TRUE
cg05187508_TC1	chr6	29974306	ZNRD1ASP	NR_026751.2	TSSBody	13653948	81686309	I	Red	+	FALSE	TRUE
cg05195129_BC21	chr6	31893767	C2	NM_001282457.2	TSSBody	NA	19646197	II	Both	-	FALSE	TRUE
cg05195129_TC21	chr6	31893767	C2	NM_001282457.2	TSSBody	NA	59801107	II	Both	+	FALSE	TRUE
cg05197770_BC21	chr6	28494884	GPX5	NM_001509.3	TSSBody	NA	20719172	II	Both	-	FALSE	TRUE
cg05199148_BC21	chr6	31604290	PRRC2A	NM_080686.3	TSSBody	NA	85649141	II	Both	-	FALSE	TRUE
cg05206351_TC21	chr9	139802196	TRAF2	NM_021138.4	TSSBody	NA	70606171	II	Both	+	FALSE	TRUE
cg05211920_TC21	chr16	11034499	DEXI	NM_014015.4	TSSBody	NA	46799248	II	Both	+	FALSE	TRUE
cg05212664_BC21	chr14	24639769	NA	NA	NA	NA	98681156	II	Both	-	FALSE	TRUE
cg05212664_TC21	chr14	24639769	NA	NA	NA	NA	95802820	II	Both	+	FALSE	TRUE
cg05212664_TO21	chr14	24639769	NA	NA	NA	NA	46681203	II	Both	+	FALSE	TRUE
cg05233535_BC21	chr12	6497969	LTBR	NM_001270987.2	TSSBody	NA	87616240	II	Both	-	FALSE	TRUE
cg05236424_BC21	chr1	153600830	S100A13	NM_001024213.1	TSS1500	NA	76710408	II	Both	-	FALSE	TRUE
cg05237001_BC21	chr6	29691245	HLA-F	NM_018950.2	TSSBody	NA	50799584	II	Both	-	FALSE	TRUE
cg05242261_BC21	chr6	32812073	PSMB8-AS1	NR_037176.1	TSSBody	NA	5778427	II	Both	-	FALSE	TRUE
cg05243421_BC21	chr6	29364245	OR12D2	NM_013936.3	TSS200	NA	86784260	II	Both	-	FALSE	TRUE
cg05246277_BC21	chr6	32821365	TAP1	NM_000593.5	TSSBody	NA	92788419	II	Both	-	FALSE	TRUE
cg05276175_BC21	chr6	32940312	BRD2	NM_005104.4	TSSBody	NA	53798136	II	Both	-	FALSE	TRUE
cg05292460_BC21	chr6	31600180	PRRC2A	NM_080686.3	TSSBody	NA	74775528	II	Both	-	FALSE	TRUE
cg05293117_BC21	chr6	31371353	MICA	NM_001289154.2	TSSBody	NA	93640400	II	Both	-	FALSE	TRUE
cg05295536_BC21	chr6	30749628	HCG20	NR_138037.1	TSSBody	NA	74664870	II	Both	-	FALSE	TRUE
cg05295536_TC21	chr6	30749628	HCG20	NR_138037.1	TSSBody	NA	41625234	II	Both	+	FALSE	TRUE
cg05303503_BC21	chr9	139776336	NA	NA	NA	NA	5686550	II	Both	-	FALSE	TRUE
cg05303503_TC21	chr9	139776336	NA	NA	NA	NA	3772279	II	Both	+	FALSE	TRUE
cg05312377_TC21	chr1	152094931	NA	NA	NA	NA	44680970	II	Both	+	FALSE	TRUE
cg05323467_BC21	chr6	32121758	LOC100507547	NR_037169.1	TSSBody	NA	58786861	II	Both	-	FALSE	TRUE
cg05346947_BC21	chr6	31164968	HCG27	NR_026791.1	TSS1500	NA	90749899	II	Both	-	FALSE	TRUE
cg05358170_BC21	chr6	29692399	HLA-F	NM_018950.2	TSSBody	NA	99750410	II	Both	-	FALSE	TRUE
cg05360220_TO21	chr1	2488036	TNFRSF14	NM_001297605.1	TSSBody	NA	11766168	II	Both	+	FALSE	TRUE
cg05368949_BC21	chr22	39474371	APOBEC3G	NM_001349436.1	TSSBody	NA	9772365	II	Both	-	FALSE	TRUE
cg05370853_BC1	chr6	32606634	HLA-DQA1	NM_002122.5	TSSBody	9800392	54643921	I	Red	-	FALSE	TRUE
cg05379324_TC21	chr6	33372938	KIFC1	NM_002263.4	TSSBody	NA	7763900	II	Both	+	FALSE	TRUE
cg05385119_BC21	chr6	30539063	ABCF1	NM_001090.3	TSS200	NA	5766102	II	Both	-	FALSE	TRUE
cg05393509_TC21	chr6	30294475	HCG18	NR_102327.1	TSSBody	NA	41799883	II	Both	+	FALSE	TRUE
cg05412930_BC21	chr6	32820586	TAP1	NM_000593.5	TSSBody	NA	89743563	II	Both	-	FALSE	TRUE
cg05413918_BC21	chr6	33387188	CUTA	NM_015921.3	TSS1500	NA	86662329	II	Both	-	FALSE	TRUE
cg05429895_BC21	chr9	120466640	TLR4	NM_138557.3	TSS200	NA	51703254	II	Both	-	FALSE	TRUE
cg05429895_TC21	chr9	120466640	TLR4	NM_138557.3	TSS200	NA	13704123	II	Both	+	FALSE	TRUE
cg05465342_BC21	chr6	32121841	LOC100507547	NR_037169.1	TSSBody	NA	66664582	II	Both	-	FALSE	TRUE
cg05520765_TC21	chr15	74290287	PML	NM_033246.2	TSSBody	NA	99614504	II	Both	+	FALSE	TRUE
cg05523142_TC1	chr3	130659993	ATP2C1	NM_001199182.2	TSSBody	92724121	39664189	I	Red	+	TRUE	TRUE
cg05525200_BC21	chr6	33405993	SYNGAP1	NM_001130066.2	TSSBody	NA	5683284	II	Both	-	FALSE	TRUE
cg05525200_BO21	chr6	33405993	SYNGAP1	NM_001130066.2	TSSBody	NA	1711533	II	Both	-	FALSE	TRUE
cg05525200_TC21	chr6	33405993	SYNGAP1	NM_001130066.2	TSSBody	NA	2800253	II	Both	+	FALSE	TRUE
cg05538358_BC21	chr6	33409388	SYNGAP1	NM_001130066.2	TSSBody	NA	97617545	II	Both	-	FALSE	TRUE
cg05545172_TC21	chr6	32811777	PSMB8-AS1	NR_037176.1	TSS200	NA	13799895	II	Both	+	FALSE	TRUE
cg05600758_BC21	chr6	32939783	BRD2	NM_005104.4	TSSBody	NA	91740150	II	Both	-	FALSE	TRUE
cg05603292_TC21	chr6	29691631	HLA-F	NM_018950.2	TSSBody	NA	18691100	II	Both	+	FALSE	TRUE
cg05608716_TC21	chr16	3096484	MMP25	NM_022468.5	TSS200	NA	79748255	II	Both	+	FALSE	TRUE
cg05614351_BC21	chr6	31636368	CSNK2B	NM_001282385.1	TSSBody	NA	16725543	II	Both	-	FALSE	TRUE
cg05614351_BO21	chr6	31636368	CSNK2B	NM_001282385.1	TSSBody	NA	21808297	II	Both	-	FALSE	TRUE
cg05614351_TC21	chr6	31636368	CSNK2B	NM_001282385.1	TSSBody	NA	33786175	II	Both	+	FALSE	TRUE
cg05625773_BC21	chr6	30614796	C6orf136	NM_145029.4	TSS200	NA	13802883	II	Both	-	FALSE	TRUE
cg05629721_BO21	chr6	32812280	PSMB8-AS1	NR_037176.1	TSSBody	NA	1670944	II	Both	-	FALSE	TRUE
cg05629721_TC21	chr6	32812280	PSMB8-AS1	NR_037176.1	TSSBody	NA	97642835	II	Both	+	FALSE	TRUE
cg05632020_BC21	chr6	30885310	VARS2	NM_001167733.2	TSSBody	NA	52665858	II	Both	-	FALSE	TRUE
cg05632020_BO21	chr6	30885310	VARS2	NM_001167733.2	TSSBody	NA	10718979	II	Both	-	FALSE	TRUE
cg05668779_BC21	chr1	153190009	PRR9	NM_001195571.2	TSS200	NA	3753834	II	Both	-	FALSE	TRUE
cg05668779_TC21	chr1	153190009	PRR9	NM_001195571.2	TSS200	NA	52701880	II	Both	+	FALSE	TRUE
cg05703744_TC21	chr6	30849187	DDR1	NM_001297652.1	TSS1500	NA	92706233	II	Both	+	FALSE	TRUE
cg05745845_BC21	chr19	56348195	NLRP4	NM_134444.5	TSSBody	NA	1767425	II	Both	-	FALSE	TRUE
cg05789250_BC21	chr6	31804306	SNHG32	NR_160950.1	TSSBody	NA	9632421	II	Both	-	FALSE	TRUE
cg05826626_BC21	chr6	32820862	TAP1	NM_000593.5	TSSBody	NA	31713139	II	Both	-	FALSE	TRUE
cg05850971_BO21	chr6	32135027	EGFL8	NM_030652.4	TSSBody	NA	45793179	II	Both	-	FALSE	TRUE
cg05850971_TC21	chr6	32135027	EGFL8	NM_030652.4	TSSBody	NA	23805107	II	Both	+	FALSE	TRUE
cg05851866_TC21	chr13	108955075	TNFSF13B	NM_001145645.2	TSSBody	NA	78700313	II	Both	+	FALSE	TRUE
cg05867050_TC21	chr3	187084698	RTP4	NM_022147.3	TSS1500	NA	56754906	II	Both	+	FALSE	TRUE
cg05870356_BC21	chr1	79093646	IFI44L	NM_006820.4	TSSBody	NA	24617974	II	Both	-	FALSE	TRUE
cg05872513_BC21	chr6	32811988	PSMB8-AS1	NR_037176.1	TSSBody	NA	49753555	II	Both	-	FALSE	TRUE
cg05891181_BC21	chr6	31165581	HCG27	NR_026791.1	TSSBody	NA	5748312	II	Both	-	FALSE	TRUE
cg05891181_TC21	chr6	31165581	HCG27	NR_026791.1	TSSBody	NA	4646107	II	Both	+	FALSE	TRUE
cg05894653_BC21	chr6	30882084	VARS2	NM_001167733.2	TSSBody	NA	97751238	II	Both	-	FALSE	TRUE
cg05908077_TC21	chr6	32940100	BRD2	NM_005104.4	TSSBody	NA	90754384	II	Both	+	FALSE	TRUE
cg05911799_BC21	chr6	32708899	HLA-DQA2	NM_020056.5	TSS1500	NA	7716420	II	Both	-	FALSE	TRUE
cg05931684_BC21	chr6	31865274	EHMT2	NM_001318833.1	TSS1500	NA	80604375	II	Both	-	FALSE	TRUE
cg05953594_BC21	chr3	187085639	RTP4	NM_022147.3	TSS1500	NA	97632108	II	Both	-	FALSE	TRUE
cg05953595_TC21	chr3	187085643	RTP4	NM_022147.3	TSS1500	NA	95697183	II	Both	+	FALSE	TRUE
cg05970434_BC21	chr6	32134461	EGFL8	NM_030652.4	TSSBody	NA	32804538	II	Both	-	FALSE	TRUE
cg05970434_TO21	chr6	32134461	EGFL8	NM_030652.4	TSSBody	NA	89695977	II	Both	+	FALSE	TRUE
cg05982236_BC21	chr6	33358419	KIFC1	NM_002263.4	TSS1500	NA	86623966	II	Both	-	FALSE	TRUE
cg05982236_BO21	chr6	33358419	KIFC1	NM_002263.4	TSS1500	NA	32804864	II	Both	-	FALSE	TRUE
cg06003169_BC21	chr4	103422460	NFKB1	NM_001165412.2	TSS200	NA	87708387	II	Both	-	FALSE	TRUE
cg06012011_BC21	chr6	30852761	DDR1	NM_001297652.1	TSSBody	NA	67621859	II	Both	-	FALSE	TRUE
cg06012011_TC21	chr6	30852761	DDR1	NM_001297652.1	TSSBody	NA	4716339	II	Both	+	FALSE	TRUE
cg06025456_BC21	chr6	32120863	LOC100507547	NR_037169.1	TSSBody	NA	58725286	II	Both	-	FALSE	TRUE
cg06025456_TO21	chr6	32120863	LOC100507547	NR_037169.1	TSSBody	NA	80672118	II	Both	+	FALSE	TRUE
cg06050636_TC21	chr1	153600597	S100A13	NM_001024213.1	TSS1500	NA	2612954	II	Both	+	FALSE	TRUE
cg06051311_BC21	chr6	30131001	TRIM15	NM_033229.3	TSS1500	NA	44740181	II	Both	-	FALSE	TRUE
cg06051311_BO21	chr6	30131001	TRIM15	NM_033229.3	TSS1500	NA	94612195	II	Both	-	FALSE	TRUE
cg06055293_BO21	chr11	119037210	NA	NA	NA	NA	99775956	II	Both	-	FALSE	TRUE
cg06055293_TC21	chr11	119037210	NA	NA	NA	NA	53769525	II	Both	+	FALSE	TRUE
cg06055293_TO21	chr11	119037210	NA	NA	NA	NA	94663247	II	Both	+	FALSE	TRUE
cg06059055_TC21	chr6	31919030	CFB	NM_001710.6	TSSBody	NA	92618914	II	Both	+	FALSE	TRUE
cg06083200_BC21	chr6	30033850	PPP1R11	NM_021959.3	TSS1500	NA	45630258	II	Both	-	FALSE	TRUE
cg06085204_BC21	chr17	6659164	XAF1	NM_001353140.2	TSS1500	NA	90725175	II	Both	-	FALSE	TRUE
cg06092729_BC21	chr12	64845451	TBK1	NM_013254.4	TSS1500	NA	2794335	II	Both	-	FALSE	TRUE
cg06092729_BO21	chr12	64845451	TBK1	NM_013254.4	TSS1500	NA	76783933	II	Both	-	FALSE	TRUE
cg06092729_TO21	chr12	64845451	TBK1	NM_013254.4	TSS1500	NA	50698225	II	Both	+	FALSE	TRUE
cg06102149_TC21	chr6	33391615	SYNGAP1	NM_001130066.2	TSSBody	NA	87802826	II	Both	+	FALSE	TRUE
cg06108383_BC21	chr6	32120899	LOC100507547	NR_037169.1	TSSBody	NA	58782118	II	Both	-	FALSE	TRUE
cg06127619_BC21	chr6	30292755	HCG18	NR_102327.1	TSSBody	NA	46607175	II	Both	-	FALSE	TRUE
cg06138160_BO21	chr6	30749576	HCG20	NR_138037.1	TSSBody	NA	82638845	II	Both	-	FALSE	TRUE
cg06138160_TC21	chr6	30749576	HCG20	NR_138037.1	TSSBody	NA	3629541	II	Both	+	FALSE	TRUE
cg06138160_TO21	chr6	30749576	HCG20	NR_138037.1	TSSBody	NA	99678980	II	Both	+	FALSE	TRUE
cg06181531_BC21	chr16	57023355	NLRC5	NM_001330552.2	TSS200	NA	41664285	II	Both	-	FALSE	TRUE
cg06182584_BC21	chr6	30614329	C6orf136	NM_145029.4	TSS1500	NA	81788462	II	Both	-	FALSE	TRUE
cg06195280_BC21	chr17	6658706	XAF1	NM_001353140.2	TSS1500	NA	62614938	II	Both	-	FALSE	TRUE
cg06195280_TC21	chr17	6658706	XAF1	NM_001353140.2	TSS1500	NA	11682582	II	Both	+	FALSE	TRUE
cg06200824_BO21	chr6	30859855	DDR1	NM_001297652.1	TSSBody	NA	24708893	II	Both	-	FALSE	TRUE
cg06200824_TC21	chr6	30859855	DDR1	NM_001297652.1	TSSBody	NA	42704869	II	Both	+	FALSE	TRUE
cg06235437_BC21	chr6	32122300	LOC100507547	NR_037169.1	TSS200	NA	90792148	II	Both	-	FALSE	TRUE
cg06241803_BC21	chr6	30538984	ABCF1	NM_001090.3	TSS1500	NA	85603338	II	Both	-	FALSE	TRUE
cg06244333_TC21	chr6	29555026	OR2H2	NM_007160.3	TSS1500	NA	3803383	II	Both	+	FALSE	TRUE
cg06244333_TO21	chr6	29555026	OR2H2	NM_007160.3	TSS1500	NA	64678108	II	Both	+	FALSE	TRUE
cg06250213_BC21	chr6	31934523	SKIV2L	NM_006929.5	TSSBody	NA	9692319	II	Both	-	FALSE	TRUE
cg06265737_TC21	chr16	57060491	NLRC5	NM_001330552.2	TSSBody	NA	2654439	II	Both	+	FALSE	TRUE
cg06297863_BC21	chr6	29626990	MOG	NM_206814.6	TSSBody	NA	91717104	II	Both	-	FALSE	TRUE
cg06308109_BC21	chr6	29548691	SNORD32B	NR_003049.1	TSS1500	NA	3604286	II	Both	-	FALSE	TRUE
cg06308109_BO21	chr6	29548691	SNORD32B	NR_003049.1	TSS1500	NA	91776528	II	Both	-	FALSE	TRUE
cg06315442_BC1	chr4	17586687	LAP3	NM_015907.2	TSSBody	44652537	68720949	I	Grn	-	FALSE	TRUE
cg06315442_BC21	chr4	17586687	LAP3	NM_015907.2	TSSBody	NA	92756100	II	Both	-	FALSE	TRUE
cg06315442_TC1	chr4	17586687	LAP3	NM_015907.2	TSSBody	48700880	9768199	I	Red	+	TRUE	TRUE
cg06315442_TC21	chr4	17586687	LAP3	NM_015907.2	TSSBody	NA	40619553	II	Both	+	TRUE	TRUE
cg06315442_TO21	chr4	17586687	LAP3	NM_015907.2	TSSBody	NA	68601278	II	Both	+	FALSE	TRUE
cg06315472_BC1	chr4	17590505	LAP3	NM_015907.2	TSSBody	68626904	24719895	I	Red	-	TRUE	TRUE
cg06315472_BC21	chr4	17590505	LAP3	NM_015907.2	TSSBody	NA	13777922	II	Both	-	TRUE	TRUE
cg06315472_BO1	chr4	17590505	LAP3	NM_015907.2	TSSBody	64785882	18648838	I	Grn	-	FALSE	TRUE
cg06315472_BO21	chr4	17590505	LAP3	NM_015907.2	TSSBody	NA	39729559	II	Both	-	FALSE	TRUE
cg06315472_TO1	chr4	17590505	LAP3	NM_015907.2	TSSBody	92683320	91662548	I	Grn	+	TRUE	TRUE
cg06315472_TO21	chr4	17590505	LAP3	NM_015907.2	TSSBody	NA	48773848	II	Both	+	TRUE	TRUE
cg06315697_TC21	chr4	17606287	LAP3	NM_015907.2	TSSBody	NA	73784988	II	Both	+	FALSE	TRUE
cg06316695_BC21	chr6	33176607	RING1	NM_002931.4	TSSBody	NA	88806271	II	Both	-	FALSE	TRUE
cg06316695_TC21	chr6	33176607	RING1	NM_002931.4	TSSBody	NA	99640965	II	Both	+	FALSE	TRUE
cg06346150_BC21	chr1	152093622	NA	NA	NA	NA	47744841	II	Both	-	FALSE	TRUE
cg06346150_TC21	chr1	152093622	NA	NA	NA	NA	76664903	II	Both	+	FALSE	TRUE
cg06351503_BC21	chr6	31928060	NELFE	NM_002904.6	TSS1500	NA	77793376	II	Both	-	FALSE	TRUE
cg06351503_TC21	chr6	31928060	NELFE	NM_002904.6	TSS1500	NA	93692345	II	Both	+	FALSE	TRUE
cg06358442_TC21	chr6	33239202	VPS52	NM_001289175.1	TSSBody	NA	57620114	II	Both	+	FALSE	TRUE
cg06363559_TC21	chr6	33175156	MIR219A1	NR_029633.1	TSS1500	NA	79632500	II	Both	+	FALSE	TRUE
cg06365108_TC21	chr6	30104626	TRIM40	NM_001286633.2	TSSBody	NA	76733194	II	Both	+	FALSE	TRUE
cg06365108_TO21	chr6	30104626	TRIM40	NM_001286633.2	TSSBody	NA	8622193	II	Both	+	FALSE	TRUE
cg06370542_BC21	chr12	6923187	CD4	NM_001195017.3	TSSBody	NA	75780338	II	Both	-	FALSE	TRUE
cg06370542_TC21	chr12	6923187	CD4	NM_001195017.3	TSSBody	NA	73683252	II	Both	+	FALSE	TRUE
cg06404930_BO21	chr9	139779624	TRAF2	NM_021138.4	TSS1500	NA	45756536	II	Both	-	FALSE	TRUE
cg06404930_TC21	chr9	139779624	TRAF2	NM_021138.4	TSS1500	NA	21614534	II	Both	+	FALSE	TRUE
cg06405222_TC21	chr4	154605276	TLR2	NM_001318793.2	TSS200	NA	40609537	II	Both	+	FALSE	TRUE
cg06408571_TC21	chr6	33376675	KIFC1	NM_002263.4	TSSBody	NA	73766260	II	Both	+	FALSE	TRUE
cg06472065_TC21	chr6	33394446	SYNGAP1	NM_001130066.2	TSSBody	NA	9709263	II	Both	+	FALSE	TRUE
cg06474435_BC1	chr4	39772955	UBE2K	NM_001312647.2	TSSBody	88800888	60767956	I	Red	-	TRUE	TRUE
cg06474435_BC21	chr4	39772955	UBE2K	NM_001312647.2	TSSBody	NA	61664578	II	Both	-	TRUE	TRUE
cg06474435_TO21	chr4	39772955	UBE2K	NM_001312647.2	TSSBody	NA	33719168	II	Both	+	TRUE	TRUE
cg06484169_BC1	chr6	33052354	HLA-DPB1	NM_002121.6	TSSBody	47630171	40784100	I	Grn	-	FALSE	TRUE
cg06484169_TC1	chr6	33052354	HLA-DPB1	NM_002121.6	TSSBody	88605450	9653870	I	Red	+	FALSE	TRUE
cg06485787_BC21	chr11	57365717	SERPING1	NM_000062.3	TSSBody	NA	48729946	II	Both	-	FALSE	TRUE
cg06486622_TC21	chr6	29718119	HLA-F-AS1	NR_026972.1	TSS1500	NA	23678255	II	Both	+	FALSE	TRUE
cg06495803_BC21	chr12	6553489	CD27-AS1	NR_015382.2	TSSBody	NA	6723986	II	Both	-	FALSE	TRUE
cg06495803_TC21	chr12	6553489	CD27-AS1	NR_015382.2	TSSBody	NA	75810266	II	Both	+	FALSE	TRUE
cg06498520_BC21	chr4	186990006	TLR3	NM_003265.2	TSS1500	NA	85787549	II	Both	-	FALSE	TRUE
cg06498520_TC21	chr4	186990006	TLR3	NM_003265.2	TSS1500	NA	27657858	II	Both	+	FALSE	TRUE
cg06518831_BC21	chr6	31632541	GPANK1	NM_033177.4	TSSBody	NA	71739271	II	Both	-	FALSE	TRUE
cg06551553_BC21	chr1	152769098	LCE1D	NM_178352.3	TSS200	NA	68744130	II	Both	-	FALSE	TRUE
cg06562291_TC21	chr1	153599573	S100A13	NM_001024210.2	TSSBody	NA	72788100	II	Both	+	FALSE	TRUE
cg06570298_BC21	chr6	30025281	ZNRD1ASP	NR_026751.2	TSSBody	NA	34614884	II	Both	-	FALSE	TRUE
cg06570818_TC21	chr6	32146466	AGPAT1	NM_001371438.1	TSS1500	NA	53699587	II	Both	+	FALSE	TRUE
cg06571407_BC21	chr20	44746823	CD40	NM_001322422.2	TSS200	NA	43794234	II	Both	-	FALSE	TRUE
cg06588136_BC21	chr1	196619755	CFH	NM_001014975.2	TSS1500	NA	38664820	II	Both	-	FALSE	TRUE
cg06588136_TC21	chr1	196619755	CFH	NM_001014975.2	TSS1500	NA	45697522	II	Both	+	FALSE	TRUE
cg06618866_BC21	chr4	154605087	TLR2	NM_001318793.2	TSS1500	NA	91653925	II	Both	-	FALSE	TRUE
cg06624527_BC21	chr12	6898647	CD4	NM_001195017.3	TSS200	NA	97738977	II	Both	-	FALSE	TRUE
cg06629935_BC21	chr6	30620232	C6orf136	NM_145029.4	TSSBody	NA	76688220	II	Both	-	FALSE	TRUE
cg06629935_TC21	chr6	30620232	C6orf136	NM_145029.4	TSSBody	NA	85700584	II	Both	+	FALSE	TRUE
cg06632214_BC21	chr11	314074	IFITM1	NM_003641.4	TSSBody	NA	92719249	II	Both	-	FALSE	TRUE
cg06632214_BO21	chr11	314074	IFITM1	NM_003641.4	TSSBody	NA	8619842	II	Both	-	FALSE	TRUE
cg06634056_TC21	chr6	32820608	TAP1	NM_000593.5	TSSBody	NA	64681583	II	Both	+	FALSE	TRUE
cg06671577_BC21	chr6	33176604	RING1	NM_002931.4	TSSBody	NA	18701175	II	Both	-	FALSE	TRUE
cg06685111_BC21	chr6	30295466	TRIM39	NM_001369522.1	TSSBody	NA	75603164	II	Both	-	FALSE	TRUE
cg06685111_TC21	chr6	30295466	TRIM39	NM_001369522.1	TSSBody	NA	15767240	II	Both	+	FALSE	TRUE
cg06702163_BC21	chr6	30557162	ABCF1	NM_001090.3	TSSBody	NA	90637276	II	Both	-	FALSE	TRUE
cg06716283_TC21	chr19	45504390	RELB	NM_006509.4	TSS1500	NA	29787825	II	Both	+	FALSE	TRUE
cg06789667_BC21	chr6	33393635	SYNGAP1	NM_001130066.2	TSSBody	NA	80790262	II	Both	-	FALSE	TRUE
cg06791592_BC21	chr6	32823292	PSMB9	NM_002800.5	TSSBody	NA	87617231	II	Both	-	FALSE	TRUE
cg06801569_BC21	chr6	32862729	LOC100294145	NR_037178.1	TSSBody	NA	69736836	II	Both	-	FALSE	TRUE
cg06801569_TO21	chr6	32862729	LOC100294145	NR_037178.1	TSSBody	NA	56803218	II	Both	+	FALSE	TRUE
cg06804411_BC21	chr1	153174654	LELP1	NM_001010857.3	TSS1500	NA	41713589	II	Both	-	FALSE	TRUE
cg06804411_BO21	chr1	153174654	LELP1	NM_001010857.3	TSS1500	NA	24669908	II	Both	-	FALSE	TRUE
cg06818415_BC21	chr6	33379267	PHF1	NM_002636.5	TSSBody	NA	63697233	II	Both	-	FALSE	TRUE
cg06818415_BO21	chr6	33379267	PHF1	NM_002636.5	TSSBody	NA	42621940	II	Both	-	FALSE	TRUE
cg06818415_TO21	chr6	33379267	PHF1	NM_002636.5	TSSBody	NA	85732330	II	Both	+	FALSE	TRUE
cg06819431_BC21	chr1	153605367	CHTOP	NM_001244664.1	TSS1500	NA	16715111	II	Both	-	FALSE	TRUE
cg06819687_BC21	chr6	31165567	HCG27	NR_026791.1	TSSBody	NA	25716275	II	Both	-	FALSE	TRUE
cg06819993_BC21	chr1	152177342	NA	NA	NA	NA	75742140	II	Both	-	FALSE	TRUE
cg06820197_TC21	chr6	31707640	MSH5	NM_172165.3	TSS200	NA	50639949	II	Both	+	FALSE	TRUE
cg06852255_TC21	chr6	32821611	TAP1	NM_000593.5	TSSBody	NA	81692139	II	Both	+	FALSE	TRUE
cg06862692_BC21	chr16	57023236	NLRC5	NM_001330552.2	TSS1500	NA	88675920	II	Both	-	FALSE	TRUE
cg06866282_BC21	chr12	12202803	BCL2L14	NM_001370268.1	TSSBody	NA	38769171	II	Both	-	FALSE	TRUE
cg06872964_TC21	chr1	79085250	IFI44L	NM_006820.4	TSS1500	NA	40733246	II	Both	+	FALSE	TRUE
cg06879746_BC21	chr6	30883768	VARS2	NM_001167733.2	TSSBody	NA	95642175	II	Both	-	FALSE	TRUE
cg06893977_TC21	chr6	30851928	DDR1	NM_001297653.1	TSS1500	NA	58800531	II	Both	+	FALSE	TRUE
cg06898592_BC21	chr4	103421149	NFKB1	NM_001165412.2	TSS1500	NA	90657966	II	Both	-	FALSE	TRUE
cg06898593_BC21	chr4	103421251	NFKB1	NM_001165412.2	TSS1500	NA	97696553	II	Both	-	FALSE	TRUE
cg06898593_TC21	chr4	103421251	NFKB1	NM_001165412.2	TSS1500	NA	73737273	II	Both	+	FALSE	TRUE
cg06898594_BC21	chr4	103421273	NFKB1	NM_001165412.2	TSS1500	NA	79788485	II	Both	-	FALSE	TRUE
cg06898594_BO21	chr4	103421273	NFKB1	NM_001165412.2	TSS1500	NA	99686478	II	Both	-	FALSE	TRUE
cg06898595_BC21	chr4	103421278	NFKB1	NM_001165412.2	TSS1500	NA	26746120	II	Both	-	FALSE	TRUE
cg06898595_TC21	chr4	103421278	NFKB1	NM_001165412.2	TSS1500	NA	10654115	II	Both	+	FALSE	TRUE
cg06898596_BC21	chr4	103421310	NFKB1	NM_001165412.2	TSS1500	NA	9610251	II	Both	-	FALSE	TRUE
cg06898596_TO21	chr4	103421310	NFKB1	NM_001165412.2	TSS1500	NA	29704944	II	Both	+	FALSE	TRUE
cg06898597_BC21	chr4	103421421	NFKB1	NM_001165412.2	TSS1500	NA	2738353	II	Both	-	FALSE	TRUE
cg06898598_TC21	chr4	103421568	NFKB1	NM_001165412.2	TSS1500	NA	70784947	II	Both	+	FALSE	TRUE
cg06898599_BC21	chr4	103421604	NFKB1	NM_001165412.2	TSS1500	NA	7697383	II	Both	-	FALSE	TRUE
cg06898599_TC21	chr4	103421604	NFKB1	NM_001165412.2	TSS1500	NA	82613335	II	Both	+	FALSE	TRUE
cg06898600_BC21	chr4	103421707	NFKB1	NM_001165412.2	TSS1500	NA	26729181	II	Both	-	FALSE	TRUE
cg06898601_TC21	chr4	103421887	NFKB1	NM_001165412.2	TSS1500	NA	86784946	II	Both	+	FALSE	TRUE
cg06898602_TC21	chr4	103421990	NFKB1	NM_001165412.2	TSS1500	NA	71775147	II	Both	+	FALSE	TRUE
cg06898602_TO21	chr4	103421990	NFKB1	NM_001165412.2	TSS1500	NA	22665986	II	Both	+	FALSE	TRUE
cg06898603_BC21	chr4	103422066	NFKB1	NM_001165412.2	TSS1500	NA	70702854	II	Both	-	FALSE	TRUE
cg06898603_TC21	chr4	103422066	NFKB1	NM_001165412.2	TSS1500	NA	85810870	II	Both	+	FALSE	TRUE
cg06898605_BC21	chr4	103422108	NFKB1	NM_001165412.2	TSS1500	NA	40798825	II	Both	-	FALSE	TRUE
cg06898609_BC21	chr4	103422132	NFKB1	NM_001165412.2	TSS1500	NA	82784342	II	Both	-	FALSE	TRUE
cg06898610_BC21	chr4	103422143	NFKB1	NM_001165412.2	TSS1500	NA	90688970	II	Both	-	FALSE	TRUE
cg06898616_TC21	chr4	103422255	NFKB1	NM_001165412.2	TSS1500	NA	93631964	II	Both	+	FALSE	TRUE
cg06898728_BC21	chr4	103423159	NFKB1	NM_001165412.2	TSSBody	NA	52695827	II	Both	-	FALSE	TRUE
cg06898737_TC21	chr4	103423210	NFKB1	NM_001165412.2	TSSBody	NA	73706183	II	Both	+	FALSE	TRUE
cg06898738_BC21	chr4	103423215	NFKB1	NM_001165412.2	TSSBody	NA	43640905	II	Both	-	FALSE	TRUE
cg06898754_BC21	chr4	103423584	NFKB1	NM_001165412.2	TSSBody	NA	3719405	II	Both	-	FALSE	TRUE
cg06898754_TO21	chr4	103423584	NFKB1	NM_001165412.2	TSSBody	NA	52735190	II	Both	+	FALSE	TRUE
cg06898755_BC21	chr4	103423623	NFKB1	NM_001165412.2	TSSBody	NA	47723940	II	Both	-	FALSE	TRUE
cg06898756_TC21	chr4	103423735	NFKB1	NM_001165412.2	TSSBody	NA	97694413	II	Both	+	FALSE	TRUE
cg06898757_BC21	chr4	103424156	NFKB1	NM_001165412.2	TSSBody	NA	3754384	II	Both	-	FALSE	TRUE
cg06898962_BC21	chr4	103457770	NFKB1	NM_001165412.2	TSSBody	NA	61718224	II	Both	-	FALSE	TRUE
cg06898966_BC21	chr4	103458525	NFKB1	NM_001165412.2	TSSBody	NA	60746561	II	Both	-	FALSE	TRUE
cg06898966_BO21	chr4	103458525	NFKB1	NM_001165412.2	TSSBody	NA	18708867	II	Both	-	FALSE	TRUE
cg06898966_TC21	chr4	103458525	NFKB1	NM_001165412.2	TSSBody	NA	93621931	II	Both	+	FALSE	TRUE
cg06898966_TO21	chr4	103458525	NFKB1	NM_001165412.2	TSSBody	NA	73699196	II	Both	+	FALSE	TRUE
cg06899086_BC21	chr4	103477285	NFKB1	NM_001165412.2	TSSBody	NA	69713566	II	Both	-	FALSE	TRUE
cg06899087_TC21	chr4	103477396	NFKB1	NM_001165412.2	TSSBody	NA	97723503	II	Both	+	FALSE	TRUE
cg06899088_BC21	chr4	103477579	NFKB1	NM_001165412.2	TSSBody	NA	90605489	II	Both	-	FALSE	TRUE
cg06899089_TC21	chr4	103477792	NFKB1	NM_001165412.2	TSSBody	NA	56658879	II	Both	+	FALSE	TRUE
cg06899201_TC21	chr4	103497567	NFKB1	NM_001165412.2	TSSBody	NA	81750869	II	Both	+	FALSE	TRUE
cg06899204_BO21	chr4	103497767	NFKB1	NM_001165412.2	TSSBody	NA	82616269	II	Both	-	FALSE	TRUE
cg06899204_TC21	chr4	103497767	NFKB1	NM_001165412.2	TSSBody	NA	97606599	II	Both	+	FALSE	TRUE
cg06899205_BC21	chr4	103497784	NFKB1	NM_001165412.2	TSSBody	NA	45770233	II	Both	-	FALSE	TRUE
cg06899205_TC21	chr4	103497784	NFKB1	NM_001165412.2	TSSBody	NA	10704963	II	Both	+	FALSE	TRUE
cg06899206_TC21	chr4	103498036	NFKB1	NM_001165412.2	TSSBody	NA	49626537	II	Both	+	FALSE	TRUE
cg06899208_BC21	chr4	103498107	NFKB1	NM_001165412.2	TSSBody	NA	96619191	II	Both	-	FALSE	TRUE
cg06899208_BO21	chr4	103498107	NFKB1	NM_001165412.2	TSSBody	NA	7678957	II	Both	-	FALSE	TRUE
cg06899209_BO21	chr4	103498184	NFKB1	NM_001165412.2	TSSBody	NA	89601265	II	Both	-	FALSE	TRUE
cg06899209_TC21	chr4	103498184	NFKB1	NM_001165412.2	TSSBody	NA	99711130	II	Both	+	FALSE	TRUE
cg06899212_BC21	chr4	103498796	NFKB1	NM_001165412.2	TSSBody	NA	90773103	II	Both	-	FALSE	TRUE
cg06899212_TO21	chr4	103498796	NFKB1	NM_001165412.2	TSSBody	NA	86663203	II	Both	+	FALSE	TRUE
cg06899213_TC21	chr4	103498804	NFKB1	NM_001165412.2	TSSBody	NA	70723554	II	Both	+	FALSE	TRUE
cg06899213_TO21	chr4	103498804	NFKB1	NM_001165412.2	TSSBody	NA	19755950	II	Both	+	FALSE	TRUE
cg06909315_BC21	chr9	139796221	TRAF2	NM_021138.4	TSSBody	NA	63752233	II	Both	-	FALSE	TRUE
cg06909315_TC21	chr9	139796221	TRAF2	NM_021138.4	TSSBody	NA	53762176	II	Both	+	FALSE	TRUE
cg06933031_TC21	chr6	32940391	BRD2	NM_005104.4	TSSBody	NA	40740835	II	Both	+	FALSE	TRUE
cg06937619_BC21	chr6	31104593	PSORS1C1	NM_014068.3	TSSBody	NA	62682526	II	Both	-	FALSE	TRUE
cg06974409_BC21	chr6	32134323	EGFL8	NM_030652.4	TSSBody	NA	71606234	II	Both	-	FALSE	TRUE
cg06974409_TC21	chr6	32134323	EGFL8	NM_030652.4	TSSBody	NA	46772992	II	Both	+	FALSE	TRUE
cg06979645_BC21	chr6	33386196	CUTA	NM_015921.3	TSS1500	NA	58760523	II	Both	-	FALSE	TRUE
cg06988236_TC21	chr6	30293962	TRIM39	NM_001369522.1	TSS1500	NA	2780574	II	Both	+	FALSE	TRUE
cg06993041_BC21	chr6	30687972	TUBB	NM_001293214.2	TSS200	NA	10770925	II	Both	-	FALSE	TRUE
cg06993041_TC21	chr6	30687972	TUBB	NM_001293214.2	TSS200	NA	13758155	II	Both	+	FALSE	TRUE
cg06993041_TO21	chr6	30687972	TUBB	NM_001293214.2	TSS200	NA	63604589	II	Both	+	FALSE	TRUE
cg06996599_BC21	chr6	30619232	C6orf136	NM_145029.4	TSSBody	NA	5722237	II	Both	-	FALSE	TRUE
cg06998181_BC21	chr11	57368043	SERPING1	NM_000062.3	TSSBody	NA	62637946	II	Both	-	FALSE	TRUE
cg06998181_TC21	chr11	57368043	SERPING1	NM_000062.3	TSSBody	NA	93713162	II	Both	+	FALSE	TRUE
cg07016276_TC21	chr6	29692009	HLA-F	NM_018950.2	TSSBody	NA	22690137	II	Both	+	FALSE	TRUE
cg07021538_BC21	chr6	30034451	PPP1R11	NM_021959.3	TSS1500	NA	45664279	II	Both	-	FALSE	TRUE
cg07022880_BC21	chr6	31465461	MICB	NM_001289161.2	TSS1500	NA	4707302	II	Both	-	FALSE	TRUE
cg07022880_TO21	chr6	31465461	MICB	NM_001289161.2	TSS1500	NA	11755989	II	Both	+	FALSE	TRUE
cg07028241_BC21	chr6	32134378	EGFL8	NM_030652.4	TSSBody	NA	81796992	II	Both	-	FALSE	TRUE
cg07028241_BO21	chr6	32134378	EGFL8	NM_030652.4	TSSBody	NA	86790902	II	Both	-	FALSE	TRUE
cg07028241_TC21	chr6	32134378	EGFL8	NM_030652.4	TSSBody	NA	6713550	II	Both	+	FALSE	TRUE
cg07054754_TC21	chr16	57092957	NLRC5	NM_001330552.2	TSSBody	NA	97689963	II	Both	+	FALSE	TRUE
cg07063572_TC21	chr15	74315539	PML	NM_033246.2	TSSBody	NA	77777585	II	Both	+	FALSE	TRUE
cg07068375_BC21	chr6	30294032	TRIM39	NM_001369522.1	TSS1500	NA	35669925	II	Both	-	FALSE	TRUE
cg07078789_BC21	chr6	31465720	MICB	NM_001289161.2	TSS1500	NA	2680175	II	Both	-	FALSE	TRUE
cg07089321_TC21	chr6	31804739	SNHG32	NR_160950.1	TSSBody	NA	82750383	II	Both	+	FALSE	TRUE
cg07099052_BO21	chr1	153610760	CHTOP	NM_001244664.1	TSSBody	NA	94737967	II	Both	-	FALSE	TRUE
cg07099052_TC21	chr1	153610760	CHTOP	NM_001244664.1	TSSBody	NA	20761201	II	Both	+	FALSE	TRUE
cg07107453_BC21	chr1	79114976	IFI44	NR_135640.1	TSS1500	NA	75709958	II	Both	-	FALSE	TRUE
cg07107453_BO21	chr1	79114976	IFI44	NR_135640.1	TSS1500	NA	15638590	II	Both	-	FALSE	TRUE
cg07148032_TC21	chr6	32935354	BRD2	NM_005104.4	TSS1500	NA	7723474	II	Both	+	FALSE	TRUE
cg07156249_BC21	chr6	32822911	TAP1	NM_000593.5	TSS1500	NA	76743870	II	Both	-	FALSE	TRUE
cg07156249_TC21	chr6	32822911	TAP1	NM_000593.5	TSS1500	NA	91707186	II	Both	+	FALSE	TRUE
cg07187855_TC21	chr6	30854161	DDR1	NM_001297652.1	TSSBody	NA	49642125	II	Both	+	FALSE	TRUE
cg07192821_BC21	chr15	45003560	B2M	NM_004048.3	TSS200	NA	64651122	II	Both	-	FALSE	TRUE
cg07192857_BC21	chr6	31795181	HSPA1B	NM_005346.6	TSS1500	NA	51737598	II	Both	-	FALSE	TRUE
cg07194295_BC21	chr15	74314816	PML	NM_033246.2	TSSBody	NA	60653943	II	Both	-	FALSE	TRUE
cg07194295_BO21	chr15	74314816	PML	NM_033246.2	TSSBody	NA	96798585	II	Both	-	FALSE	TRUE
cg07203873_BO21	chr6	32937586	BRD2	NM_001113182.3	TSS1500	NA	22612562	II	Both	-	FALSE	TRUE
cg07203873_TC21	chr6	32937586	BRD2	NM_001113182.3	TSS1500	NA	99769187	II	Both	+	FALSE	TRUE
cg07217980_BC1	chr4	151884590	LRBA	NM_001367550.1	TSSBody	52724930	96713191	I	Red	-	TRUE	TRUE
cg07223713_BC21	chr6	32936520	BRD2	NM_005104.4	TSSBody	NA	69670175	II	Both	-	FALSE	TRUE
cg07235456_BC21	chr6	31935499	SKIV2L	NM_006929.5	TSSBody	NA	92638931	II	Both	-	FALSE	TRUE
cg07235456_TO21	chr6	31935499	SKIV2L	NM_006929.5	TSSBody	NA	57669184	II	Both	+	FALSE	TRUE
cg07243669_BC21	chr4	154603874	NA	NA	NA	NA	7737899	II	Both	-	FALSE	TRUE
cg07243670_TC21	chr4	154604804	TLR2	NM_001318793.2	TSS1500	NA	35754863	II	Both	+	FALSE	TRUE
cg07243672_TC21	chr4	154604950	TLR2	NM_001318793.2	TSS1500	NA	73716247	II	Both	+	FALSE	TRUE
cg07243674_BC21	chr4	154605029	TLR2	NM_001318793.2	TSS1500	NA	27711553	II	Both	-	FALSE	TRUE
cg07243855_TC21	chr4	154622705	TLR2	NM_001318793.2	TSSBody	NA	99804303	II	Both	+	FALSE	TRUE
cg07243858_TC21	chr4	154623443	TLR2	NM_001318793.2	TSSBody	NA	88749575	II	Both	+	FALSE	TRUE
cg07243859_BC21	chr4	154623613	TLR2	NM_001318793.2	TSSBody	NA	42716961	II	Both	-	FALSE	TRUE
cg07243859_TO21	chr4	154623613	TLR2	NM_001318793.2	TSSBody	NA	6622279	II	Both	+	FALSE	TRUE
cg07243860_BC21	chr4	154623784	TLR2	NM_001318793.2	TSSBody	NA	8781582	II	Both	-	FALSE	TRUE
cg07243860_TC21	chr4	154623784	TLR2	NM_001318793.2	TSSBody	NA	97616834	II	Both	+	FALSE	TRUE
cg07243878_TC1	chr4	154625890	TLR2	NM_001318793.2	TSSBody	36725213	59655111	I	Red	+	FALSE	TRUE
cg07243878_TC21	chr4	154625890	TLR2	NM_001318793.2	TSSBody	NA	51763593	II	Both	+	FALSE	TRUE
cg07243880_BC1	chr4	154626088	TLR2	NM_001318793.2	TSSBody	66720868	7642598	I	Red	-	FALSE	TRUE
cg07243880_BC21	chr4	154626088	TLR2	NM_001318793.2	TSSBody	NA	34713595	II	Both	-	FALSE	TRUE
cg07243880_BO1	chr4	154626088	TLR2	NM_001318793.2	TSSBody	94738218	29771884	I	Grn	-	TRUE	TRUE
cg07243880_BO21	chr4	154626088	TLR2	NM_001318793.2	TSSBody	NA	55765258	II	Both	-	TRUE	TRUE
cg07249939_TC21	chr6	31867995	C2	NM_001282457.2	TSSBody	NA	91796234	II	Both	+	FALSE	TRUE
cg07266533_BC21	chr6	31850795	EHMT2	NM_006709.5	TSSBody	NA	59707235	II	Both	-	FALSE	TRUE
cg07266533_TC21	chr6	31850795	EHMT2	NM_006709.5	TSSBody	NA	99762462	II	Both	+	FALSE	TRUE
cg07269567_TC21	chr6	30886161	VARS2	NM_001167733.2	TSSBody	NA	2747316	II	Both	+	FALSE	TRUE
cg07270511_BC21	chr6	31929131	SKIV2L	NM_006929.5	TSSBody	NA	78708593	II	Both	-	FALSE	TRUE
cg07275218_TC21	chr6	32942714	BRD2	NM_005104.4	TSSBody	NA	43623559	II	Both	+	FALSE	TRUE
cg07285403_TC21	chr12	12201985	BCL2L14	NM_001370268.1	TSS1500	NA	9629434	II	Both	+	FALSE	TRUE
cg07299144_BC21	chr16	3105939	MMP25	NM_022468.5	TSSBody	NA	5710330	II	Both	-	FALSE	TRUE
cg07313373_BC21	chr1	247579131	NLRP3	NM_001079821.2	TSS1500	NA	97730495	II	Both	-	FALSE	TRUE
cg07343578_TC21	chr12	6494214	LTBR	NM_001270987.2	TSSBody	NA	52738545	II	Both	+	FALSE	TRUE
cg07352834_TC21	chr11	57364100	SERPING1	NM_000062.3	TSS1500	NA	89757525	II	Both	+	FALSE	TRUE
cg07383539_BC21	chr6	31462234	MICB-DT	NR_149132.1	TSSBody	NA	93794399	II	Both	-	FALSE	TRUE
cg07387607_BC21	chr6	31587714	PRRC2A	NM_080686.3	TSS1500	NA	84700897	II	Both	-	FALSE	TRUE
cg07405796_TC21	chr6	30104552	TRIM40	NM_001286633.2	TSSBody	NA	99790125	II	Both	+	FALSE	TRUE
cg07421596_TC21	chr6	31913770	CFB	NM_001710.6	TSS200	NA	50735906	II	Both	+	FALSE	TRUE
cg07436934_BC21	chr16	11033974	DEXI	NM_014015.4	TSSBody	NA	71741901	II	Both	-	FALSE	TRUE
cg07436981_TC21	chr1	153606312	CHTOP	NM_001244664.1	TSS200	NA	86645456	II	Both	+	FALSE	TRUE
cg07456831_BC21	chr6	32812275	PSMB8-AS1	NR_037176.1	TSSBody	NA	84700181	II	Both	-	FALSE	TRUE
cg07457785_BC1	chr6	29760096	HCG4	NR_002139.2	TSSBody	76706875	90640564	I	Red	-	FALSE	TRUE
cg07482220_TC21	chr6	32146520	AGPAT1	NM_001371438.1	TSS1500	NA	76810825	II	Both	+	FALSE	TRUE
cg07489624_BC21	chr6	30294195	HCG18	NR_102327.1	TSSBody	NA	90621356	II	Both	-	FALSE	TRUE
cg07489624_BO21	chr6	30294195	HCG18	NR_102327.1	TSSBody	NA	80791400	II	Both	-	FALSE	TRUE
cg07489624_TC21	chr6	30294195	HCG18	NR_102327.1	TSSBody	NA	90627334	II	Both	+	FALSE	TRUE
cg07495061_TC21	chr4	186988943	TLR3	NM_003265.2	TSS1500	NA	99791836	II	Both	+	FALSE	TRUE
cg07495063_TC21	chr4	186989158	TLR3	NM_003265.2	TSS1500	NA	8780548	II	Both	+	FALSE	TRUE
cg07495064_TC21	chr4	186989330	TLR3	NM_003265.2	TSS1500	NA	71769588	II	Both	+	FALSE	TRUE
cg07495066_TC21	chr4	186989381	TLR3	NM_003265.2	TSS1500	NA	23706255	II	Both	+	FALSE	TRUE
cg07495066_TO21	chr4	186989381	TLR3	NM_003265.2	TSS1500	NA	1630300	II	Both	+	FALSE	TRUE
cg07495067_BC21	chr4	186989437	TLR3	NM_003265.2	TSS1500	NA	58765164	II	Both	-	FALSE	TRUE
cg07495067_TC21	chr4	186989437	TLR3	NM_003265.2	TSS1500	NA	5792210	II	Both	+	FALSE	TRUE
cg07495069_BC21	chr4	186989762	TLR3	NM_003265.2	TSS1500	NA	61789957	II	Both	-	FALSE	TRUE
cg07495070_TC21	chr4	186989772	TLR3	NM_003265.2	TSS1500	NA	54661836	II	Both	+	FALSE	TRUE
cg07495071_BC21	chr4	186989882	TLR3	NM_003265.2	TSS1500	NA	3719425	II	Both	-	FALSE	TRUE
cg07495071_TC21	chr4	186989882	TLR3	NM_003265.2	TSS1500	NA	2799362	II	Both	+	FALSE	TRUE
cg07495073_BC21	chr4	186990070	TLR3	NM_003265.2	TSS1500	NA	5629179	II	Both	-	FALSE	TRUE
cg07495073_BO21	chr4	186990070	TLR3	NM_003265.2	TSS1500	NA	21676824	II	Both	-	FALSE	TRUE
cg07495188_TC21	chr4	187001615	TLR3	NM_003265.2	TSSBody	NA	94678129	II	Both	+	FALSE	TRUE
cg07495205_TC21	chr4	187002658	TLR3	NM_003265.2	TSSBody	NA	87642510	II	Both	+	FALSE	TRUE
cg07498938_TC21	chr6	31851155	EHMT2	NM_006709.5	TSSBody	NA	46642985	II	Both	+	FALSE	TRUE
cg07504780_TC21	chr6	32821684	TAP1	NM_000593.5	TSSBody	NA	60621921	II	Both	+	FALSE	TRUE
cg07516252_BC21	chr14	24641201	REC8	NM_005132.3	TSS200	NA	78760520	II	Both	-	FALSE	TRUE
cg07516252_TO21	chr14	24641201	REC8	NM_005132.3	TSS200	NA	80720943	II	Both	+	FALSE	TRUE
cg07528974_TC21	chr15	74332777	PML	NM_033246.2	TSSBody	NA	29719540	II	Both	+	FALSE	TRUE
cg07535798_BC21	chr19	45503719	RELB	NM_006509.4	TSS1500	NA	12601836	II	Both	-	FALSE	TRUE
cg07535798_TC21	chr19	45503719	RELB	NM_006509.4	TSS1500	NA	2715118	II	Both	+	FALSE	TRUE
cg07535798_TO21	chr19	45503719	RELB	NM_006509.4	TSS1500	NA	65657874	II	Both	+	FALSE	TRUE
cg07608094_BO21	chr6	32134964	EGFL8	NM_030652.4	TSSBody	NA	94654410	II	Both	-	FALSE	TRUE
cg07608094_TC21	chr6	32134964	EGFL8	NM_030652.4	TSSBody	NA	95674364	II	Both	+	FALSE	TRUE
cg07628233_TC21	chr6	33359543	KIFC1	NM_002263.4	TSS200	NA	2716246	II	Both	+	FALSE	TRUE
cg07644026_TC21	chr1	152758235	LCE1E	NM_178353.2	TSS1500	NA	4734450	II	Both	+	FALSE	TRUE
cg07648238_BC21	chr12	6493264	LTBR	NM_001270987.2	TSSBody	NA	36789960	II	Both	-	FALSE	TRUE
cg07657521_BC21	chr6	30539059	ABCF1	NM_001090.3	TSS200	NA	2724572	II	Both	-	FALSE	TRUE
cg07657521_TC21	chr6	30539059	ABCF1	NM_001090.3	TSS200	NA	56694592	II	Both	+	FALSE	TRUE
cg07682871_BC21	chr6	31105377	PSORS1C1	NM_014068.3	TSSBody	NA	5695214	II	Both	-	FALSE	TRUE
cg07682871_TC21	chr6	31105377	PSORS1C1	NM_014068.3	TSSBody	NA	81705317	II	Both	+	FALSE	TRUE
cg07713538_TC21	chr6	30879930	GTF2H4	NM_001517.5	TSSBody	NA	12674866	II	Both	+	FALSE	TRUE
cg07720160_TC1	chr6	30232814	HCG17	NR_052012.1	TSSBody	69776960	67663226	I	Red	+	FALSE	TRUE
cg07723114_BC21	chr6	31864706	EHMT2	NM_006709.5	TSSBody	NA	95796186	II	Both	-	FALSE	TRUE
cg07725191_BC21	chr6	31636239	CSNK2B	NM_001282385.1	TSSBody	NA	99735980	II	Both	-	FALSE	TRUE
cg07725389_BC21	chr6	33174613	MIR219A1	NR_029633.1	TSS1500	NA	26689228	II	Both	-	FALSE	TRUE
cg07732471_BC21	chr6	31635946	CSNK2B	NM_001282385.1	TSSBody	NA	85774315	II	Both	-	FALSE	TRUE
cg07732471_BO21	chr6	31635946	CSNK2B	NM_001282385.1	TSSBody	NA	84776939	II	Both	-	FALSE	TRUE
cg07794698_BC21	chr6	32939788	BRD2	NM_005104.4	TSSBody	NA	75682549	II	Both	-	FALSE	TRUE
cg07794698_TO21	chr6	32939788	BRD2	NM_005104.4	TSSBody	NA	41618570	II	Both	+	FALSE	TRUE
cg07820696_BC21	chr6	32935843	BRD2	NM_005104.4	TSS1500	NA	73614972	II	Both	-	FALSE	TRUE
cg07820696_TC21	chr6	32935843	BRD2	NM_005104.4	TSS1500	NA	97676249	II	Both	+	FALSE	TRUE
cg07827717_BC21	chr6	31602599	PRRC2A	NM_080686.3	TSSBody	NA	3709247	II	Both	-	FALSE	TRUE
cg07827717_TC21	chr6	31602599	PRRC2A	NM_080686.3	TSSBody	NA	89757555	II	Both	+	FALSE	TRUE
cg07829740_TC21	chr6	31850189	EHMT2	NM_006709.5	TSSBody	NA	99724304	II	Both	+	FALSE	TRUE
cg07830103_TC21	chr4	103422050	NFKB1	NM_001165412.2	TSS1500	NA	69614553	II	Both	+	FALSE	TRUE
cg07832951_TC21	chr11	119040829	NLRX1	NM_001282358.1	TSSBody	NA	9641138	II	Both	+	FALSE	TRUE
cg07876903_TC21	chr19	13049426	CALR	NM_004343.3	TSSBody	NA	4600882	II	Both	+	FALSE	TRUE
cg07880384_BC21	chr6	31913323	C2	NM_001282457.2	TSSBody	NA	81734918	II	Both	-	FALSE	TRUE
cg07889936_BC21	chr6	30616472	C6orf136	NM_145029.4	TSSBody	NA	2690330	II	Both	-	FALSE	TRUE
cg07896173_BO21	chr5	38845010	OSMR	NM_001168355.2	TSS1500	NA	77753295	II	Both	-	FALSE	TRUE
cg07896173_TC21	chr5	38845010	OSMR	NM_001168355.2	TSS1500	NA	97615859	II	Both	+	FALSE	TRUE
cg07896174_TC21	chr5	38845033	OSMR	NM_001168355.2	TSS1500	NA	42804239	II	Both	+	FALSE	TRUE
cg07896175_BC21	chr5	38845044	OSMR	NM_001168355.2	TSS1500	NA	23620934	II	Both	-	FALSE	TRUE
cg07896175_TC21	chr5	38845044	OSMR	NM_001168355.2	TSS1500	NA	86781441	II	Both	+	FALSE	TRUE
cg07896195_BC21	chr5	38845479	OSMR	NM_001168355.2	TSS1500	NA	26796991	II	Both	-	FALSE	TRUE
cg07896195_BO21	chr5	38845479	OSMR	NM_001168355.2	TSS1500	NA	42810531	II	Both	-	FALSE	TRUE
cg07896199_TC21	chr5	38845541	OSMR	NM_001168355.2	TSS1500	NA	16691114	II	Both	+	FALSE	TRUE
cg07896200_BC21	chr5	38845556	OSMR	NM_001168355.2	TSS1500	NA	82799473	II	Both	-	FALSE	TRUE
cg07896200_TC21	chr5	38845556	OSMR	NM_001168355.2	TSS1500	NA	52683255	II	Both	+	FALSE	TRUE
cg07896201_TC21	chr5	38845558	OSMR	NM_001168355.2	TSS1500	NA	48715250	II	Both	+	FALSE	TRUE
cg07896203_TC21	chr5	38845589	OSMR	NM_001168355.2	TSS1500	NA	65698520	II	Both	+	FALSE	TRUE
cg07896204_BC21	chr5	38845618	OSMR	NM_001168355.2	TSS1500	NA	67663194	II	Both	-	FALSE	TRUE
cg07896204_TC21	chr5	38845618	OSMR	NM_001168355.2	TSS1500	NA	1790140	II	Both	+	FALSE	TRUE
cg07896205_BC21	chr5	38845633	OSMR	NM_001168355.2	TSS1500	NA	51754255	II	Both	-	FALSE	TRUE
cg07896205_TO21	chr5	38845633	OSMR	NM_001168355.2	TSS1500	NA	6614983	II	Both	+	FALSE	TRUE
cg07896206_BC21	chr5	38845676	OSMR	NM_001168355.2	TSS1500	NA	51754123	II	Both	-	FALSE	TRUE
cg07896206_BO21	chr5	38845676	OSMR	NM_001168355.2	TSS1500	NA	17677159	II	Both	-	FALSE	TRUE
cg07896207_BC21	chr5	38845680	OSMR	NM_001168355.2	TSS1500	NA	90607916	II	Both	-	FALSE	TRUE
cg07896207_TC21	chr5	38845680	OSMR	NM_001168355.2	TSS1500	NA	48787245	II	Both	+	FALSE	TRUE
cg07896208_BC21	chr5	38845691	OSMR	NM_001168355.2	TSS1500	NA	6795235	II	Both	-	FALSE	TRUE
cg07896209_BC21	chr5	38845754	OSMR	NM_001168355.2	TSS1500	NA	94737207	II	Both	-	FALSE	TRUE
cg07896812_BC21	chr5	38903003	OSMR	NM_001323507.1	TSSBody	NA	49740534	II	Both	-	FALSE	TRUE
cg07896815_TC21	chr5	38903261	OSMR	NM_001323507.1	TSSBody	NA	10668851	II	Both	+	FALSE	TRUE
cg07896817_BC21	chr5	38903384	OSMR	NM_001323507.1	TSSBody	NA	50780956	II	Both	-	FALSE	TRUE
cg07896817_BO21	chr5	38903384	OSMR	NM_001323507.1	TSSBody	NA	6630561	II	Both	-	FALSE	TRUE
cg07896817_TC21	chr5	38903384	OSMR	NM_001323507.1	TSSBody	NA	67715972	II	Both	+	FALSE	TRUE
cg07896818_BO21	chr5	38903480	OSMR	NM_001323507.1	TSSBody	NA	25773273	II	Both	-	FALSE	TRUE
cg07896818_TC21	chr5	38903480	OSMR	NM_001323507.1	TSSBody	NA	73672938	II	Both	+	FALSE	TRUE
cg07896820_BC21	chr5	38903497	OSMR	NM_001323507.1	TSSBody	NA	2720264	II	Both	-	FALSE	TRUE
cg07896821_BC21	chr5	38903683	OSMR	NM_001323507.1	TSSBody	NA	20632154	II	Both	-	FALSE	TRUE
cg07896980_TC21	chr5	38931352	OSMR	NM_001323505.2	TSSBody	NA	24612827	II	Both	+	FALSE	TRUE
cg07896981_TC21	chr5	38931406	OSMR	NM_001323505.2	TSSBody	NA	82714191	II	Both	+	FALSE	TRUE
cg07896982_BC21	chr5	38931474	OSMR	NM_001323505.2	TSSBody	NA	71763964	II	Both	-	FALSE	TRUE
cg07896982_TC21	chr5	38931474	OSMR	NM_001323505.2	TSSBody	NA	70672821	II	Both	+	FALSE	TRUE
cg07896988_BC21	chr5	38931988	OSMR	NM_001323505.2	TSSBody	NA	15723988	II	Both	-	FALSE	TRUE
cg07896988_TO21	chr5	38931988	OSMR	NM_001323505.2	TSSBody	NA	56641986	II	Both	+	FALSE	TRUE
cg07896989_TC21	chr5	38932025	OSMR	NM_001323505.2	TSSBody	NA	47740536	II	Both	+	FALSE	TRUE
cg07898899_TC21	chr1	153600156	S100A13	NM_001024210.2	TSSBody	NA	87799382	II	Both	+	FALSE	TRUE
cg07908039_BC21	chr6	30856439	DDR1	NM_001297652.1	TSSBody	NA	85767192	II	Both	-	FALSE	TRUE
cg07909128_BO21	chr1	152957379	SPRR1A	NM_005987.4	TSSBody	NA	87677875	II	Both	-	FALSE	TRUE
cg07909128_TC21	chr1	152957379	SPRR1A	NM_005987.4	TSSBody	NA	56653166	II	Both	+	FALSE	TRUE
cg07910769_BC21	chr5	40933153	C7	NM_000587.4	TSSBody	NA	92746534	II	Both	-	FALSE	TRUE
cg07910769_BO21	chr5	40933153	C7	NM_000587.4	TSSBody	NA	6803845	II	Both	-	FALSE	TRUE
cg07910769_TC21	chr5	40933153	C7	NM_000587.4	TSSBody	NA	79735276	II	Both	+	FALSE	TRUE
cg07910771_BO21	chr5	40933289	C7	NM_000587.4	TSSBody	NA	22729138	II	Both	-	FALSE	TRUE
cg07910771_TC21	chr5	40933289	C7	NM_000587.4	TSSBody	NA	88618228	II	Both	+	FALSE	TRUE
cg07910771_TO21	chr5	40933289	C7	NM_000587.4	TSSBody	NA	94797953	II	Both	+	FALSE	TRUE
cg07910782_BC21	chr5	40935234	C7	NM_000587.4	TSSBody	NA	81736282	II	Both	-	FALSE	TRUE
cg07910783_TC21	chr5	40935375	C7	NM_000587.4	TSSBody	NA	45793821	II	Both	+	FALSE	TRUE
cg07910785_BC21	chr5	40935702	C7	NM_000587.4	TSSBody	NA	3678404	II	Both	-	FALSE	TRUE
cg07910785_BO21	chr5	40935702	C7	NM_000587.4	TSSBody	NA	90775461	II	Both	-	FALSE	TRUE
cg07910787_BC21	chr5	40935992	C7	NM_000587.4	TSSBody	NA	81618145	II	Both	-	FALSE	TRUE
cg07910790_TC21	chr5	40936297	C7	NM_000587.4	TSSBody	NA	93771391	II	Both	+	FALSE	TRUE
cg07910790_TO21	chr5	40936297	C7	NM_000587.4	TSSBody	NA	39797549	II	Both	+	FALSE	TRUE
cg07910791_BC21	chr5	40936334	C7	NM_000587.4	TSSBody	NA	71711931	II	Both	-	FALSE	TRUE
cg07910791_TC21	chr5	40936334	C7	NM_000587.4	TSSBody	NA	78642470	II	Both	+	FALSE	TRUE
cg07910979_BO21	chr5	40963316	C7	NM_000587.4	TSSBody	NA	20698551	II	Both	-	FALSE	TRUE
cg07910979_TC21	chr5	40963316	C7	NM_000587.4	TSSBody	NA	58735834	II	Both	+	FALSE	TRUE
cg07910980_BC21	chr5	40963370	C7	NM_000587.4	TSSBody	NA	75774392	II	Both	-	FALSE	TRUE
cg07910980_TC21	chr5	40963370	C7	NM_000587.4	TSSBody	NA	85617245	II	Both	+	FALSE	TRUE
cg07910981_BC21	chr5	40963448	C7	NM_000587.4	TSSBody	NA	9765931	II	Both	-	FALSE	TRUE
cg07910984_BC21	chr5	40963877	C7	NM_000587.4	TSSBody	NA	64786575	II	Both	-	FALSE	TRUE
cg07910984_TC21	chr5	40963877	C7	NM_000587.4	TSSBody	NA	90748206	II	Both	+	FALSE	TRUE
cg07910985_BC21	chr5	40963905	C7	NM_000587.4	TSSBody	NA	45767979	II	Both	-	FALSE	TRUE
cg07911043_BC21	chr5	40972381	C7	NM_000587.4	TSSBody	NA	61613267	II	Both	-	FALSE	TRUE
cg07911070_TC21	chr5	40975526	C7	NM_000587.4	TSSBody	NA	41623112	II	Both	+	FALSE	TRUE
cg07911081_BC21	chr5	40976143	C7	NM_000587.4	TSSBody	NA	26683124	II	Both	-	FALSE	TRUE
cg07911081_TC21	chr5	40976143	C7	NM_000587.4	TSSBody	NA	81692429	II	Both	+	FALSE	TRUE
cg07911083_BC21	chr5	40976306	C7	NM_000587.4	TSSBody	NA	8781439	II	Both	-	FALSE	TRUE
cg07911083_TC21	chr5	40976306	C7	NM_000587.4	TSSBody	NA	69710250	II	Both	+	FALSE	TRUE
cg07912416_BC21	chr6	30860130	DDR1	NM_001297652.1	TSSBody	NA	3772207	II	Both	-	FALSE	TRUE
cg07912501_TC21	chr6	30295909	TRIM39	NM_001369522.1	TSSBody	NA	8799250	II	Both	+	FALSE	TRUE
cg07916323_TC21	chr19	13048623	CALR	NM_004343.3	TSS1500	NA	9702369	II	Both	+	FALSE	TRUE
cg07916323_TO21	chr19	13048623	CALR	NM_004343.3	TSS1500	NA	89662596	II	Both	+	FALSE	TRUE
cg07930587_TC21	chr6	32823566	PSMB9	NM_002800.5	TSSBody	NA	55772992	II	Both	+	FALSE	TRUE
cg07931652_BO21	chr6	33166966	RXRB	NM_001291989.1	TSSBody	NA	94695270	II	Both	-	FALSE	TRUE
cg07931652_TC21	chr6	33166966	RXRB	NM_001291989.1	TSSBody	NA	90738116	II	Both	+	FALSE	TRUE
cg07939626_BC21	chr6	30853073	DDR1	NM_001297652.1	TSSBody	NA	26776937	II	Both	-	FALSE	TRUE
cg07945879_BC21	chr6	30879673	GTF2H4	NM_001517.5	TSSBody	NA	86799227	II	Both	-	FALSE	TRUE
cg07946923_BC21	chr6	33176087	RING1	NM_002931.4	TSS200	NA	45717151	II	Both	-	FALSE	TRUE
cg07954885_BC21	chr6	32935263	BRD2	NM_005104.4	TSS1500	NA	3766377	II	Both	-	FALSE	TRUE
cg07966123_TC21	chr6	32862953	LOC100294145	NR_037178.1	TSSBody	NA	92787920	II	Both	+	FALSE	TRUE
cg07979747_BC21	chr6	30860136	DDR1	NM_001297652.1	TSSBody	NA	9652345	II	Both	-	FALSE	TRUE
cg07990412_BC21	chr16	57092513	NLRC5	NM_001330552.2	TSSBody	NA	78618130	II	Both	-	FALSE	TRUE
cg07990412_TC21	chr16	57092513	NLRC5	NM_001330552.2	TSSBody	NA	76640315	II	Both	+	FALSE	TRUE
cg07990412_TO21	chr16	57092513	NLRC5	NM_001330552.2	TSSBody	NA	96800168	II	Both	+	FALSE	TRUE
cg07999508_BC21	chr21	42797488	MX1	NM_001178046.2	TSS1500	NA	45668593	II	Both	-	FALSE	TRUE
cg08009669_BC21	chr6	31465202	MICB	NM_001289161.2	TSS1500	NA	11723931	II	Both	-	FALSE	TRUE
cg08057899_BC21	chr6	32122460	LOC100507547	NR_037169.1	TSS1500	NA	80788505	II	Both	-	FALSE	TRUE
cg08085597_BC21	chr6	31164776	HCG27	NR_026791.1	TSS1500	NA	82772430	II	Both	-	FALSE	TRUE
cg08088295_TC1	chr6	33084741	HLA-DPB2	NR_001435.2	TSSBody	51701198	42771593	I	Red	+	FALSE	TRUE
cg08090835_TC21	chr6	33243391	RPS18	NM_022551.3	TSSBody	NA	61795913	II	Both	+	FALSE	TRUE
cg08099136_TC21	chr6	32811251	PSMB8-AS1	NR_037176.1	TSS1500	NA	88796917	II	Both	+	FALSE	TRUE
cg08103317_TC21	chr6	31707527	MSH5	NM_172165.3	TSS200	NA	97716232	II	Both	+	FALSE	TRUE
cg08105217_BC21	chr6	33405496	SYNGAP1	NM_001130066.2	TSSBody	NA	41633538	II	Both	-	FALSE	TRUE
cg08124791_BC21	chr6	33386124	CUTA	NM_015921.3	TSS1500	NA	6760569	II	Both	-	FALSE	TRUE
cg08127941_TC21	chr6	30293955	TRIM39	NM_001369522.1	TSS1500	NA	9692381	II	Both	+	FALSE	TRUE
cg08149789_TC21	chr6	32940799	BRD2	NM_005104.4	TSSBody	NA	95651238	II	Both	+	FALSE	TRUE
cg08159663_BC21	chr16	57022486	NLRC5	NM_001330552.2	TSS1500	NA	46733111	II	Both	-	FALSE	TRUE
cg08159663_TC21	chr16	57022486	NLRC5	NM_001330552.2	TSS1500	NA	88607118	II	Both	+	FALSE	TRUE
cg08177495_BC21	chr6	30878952	GTF2H4	NM_001517.5	TSSBody	NA	57741949	II	Both	-	FALSE	TRUE
cg08196667_BC21	chr6	29549180	SNORD32B	NR_003049.1	TSS1500	NA	99704844	II	Both	-	FALSE	TRUE
cg08196667_TC21	chr6	29549180	SNORD32B	NR_003049.1	TSS1500	NA	80798445	II	Both	+	FALSE	TRUE
cg08227896_TC21	chr6	31894831	C2	NM_001282459.2	TSS1500	NA	79710304	II	Both	+	FALSE	TRUE
cg08228316_BC21	chr6	32940322	BRD2	NM_005104.4	TSSBody	NA	49709542	II	Both	-	FALSE	TRUE
cg08228422_BC21	chr6	32940241	BRD2	NM_005104.4	TSSBody	NA	9727352	II	Both	-	FALSE	TRUE
cg08256922_TC21	chr6	31050292	NA	NA	NA	NA	69637593	II	Both	+	FALSE	TRUE
cg08267698_BC21	chr6	33386073	CUTA	NM_015921.3	TSS200	NA	95645322	II	Both	-	FALSE	TRUE
cg08275608_TC21	chr6	32940303	BRD2	NM_005104.4	TSSBody	NA	98629541	II	Both	+	FALSE	TRUE
cg08301960_TC21	chr5	40934309	C7	NM_000587.4	TSSBody	NA	92740253	II	Both	+	FALSE	TRUE
cg08306589_BC21	chr6	31997059	C4B	NM_001002029.3	TSSBody	NA	86674226	II	Both	-	FALSE	TRUE
cg08319332_BC21	chr6	33386042	CUTA	NM_015921.3	TSS200	NA	97609142	II	Both	-	FALSE	TRUE
cg08319332_TC21	chr6	33386042	CUTA	NM_015921.3	TSS200	NA	31799165	II	Both	+	FALSE	TRUE
cg08329753_BC21	chr6	30876844	GTF2H4	NM_001517.5	TSSBody	NA	96675132	II	Both	-	FALSE	TRUE
cg08329753_BO21	chr6	30876844	GTF2H4	NM_001517.5	TSSBody	NA	82804989	II	Both	-	FALSE	TRUE
cg08339825_BC21	chr9	4984186	JAK2	NM_001322195.1	TSS1500	NA	75783489	II	Both	-	FALSE	TRUE
cg08350173_BC21	chr15	45003678	B2M	NM_004048.3	TSS200	NA	97694993	II	Both	-	FALSE	TRUE
cg08361185_BC21	chr6	32936069	BRD2	NM_005104.4	TSS1500	NA	3780257	II	Both	-	FALSE	TRUE
cg08367659_TC21	chr6	31601226	PRRC2A	NM_080686.3	TSSBody	NA	90629585	II	Both	+	FALSE	TRUE
cg08369201_TC21	chr1	153303815	PGLYRP4	NM_020393.4	TSSBody	NA	51712166	II	Both	+	FALSE	TRUE
cg08385906_TC21	chr6	31634065	GPANK1	NM_033177.4	TSS1500	NA	82604262	II	Both	+	FALSE	TRUE
cg08405587_TC21	chr6	33043138	HLA-DPA1	NM_001242524.2	TSSBody	NA	62692286	II	Both	+	FALSE	TRUE
cg08432075_TC21	chr6	31636301	CSNK2B	NM_001282385.1	TSSBody	NA	60715962	II	Both	+	FALSE	TRUE
cg08444284_BC21	chr6	30688882	TUBB	NM_001293214.2	TSSBody	NA	75699599	II	Both	-	FALSE	TRUE
cg08459087_BC21	chr15	45003643	B2M	NM_004048.3	TSS200	NA	55758154	II	Both	-	FALSE	TRUE
cg08459087_BO21	chr15	45003643	B2M	NM_004048.3	TSS200	NA	66788924	II	Both	-	FALSE	TRUE
cg08459087_TC21	chr15	45003643	B2M	NM_004048.3	TSS200	NA	9807392	II	Both	+	FALSE	TRUE
cg08460022_TC21	chr6	31795392	HSPA1B	NM_005346.6	TSS200	NA	71742879	II	Both	+	FALSE	TRUE
cg08466770_BC21	chr6	32820993	TAP1	NM_000593.5	TSSBody	NA	85764117	II	Both	-	FALSE	TRUE
cg08484518_BC21	chr6	31105526	PSORS1C1	NM_014068.3	TSSBody	NA	59728171	II	Both	-	FALSE	TRUE
cg08491668_BO21	chr6	32935236	BRD2	NM_005104.4	TSS1500	NA	96703313	II	Both	-	FALSE	TRUE
cg08509237_BC21	chr6	32122065	LOC100507547	NR_037169.1	TSSBody	NA	60803585	II	Both	-	FALSE	TRUE
cg08509237_TC21	chr6	32122065	LOC100507547	NR_037169.1	TSSBody	NA	87623408	II	Both	+	FALSE	TRUE
cg08578823_BC21	chr19	10380218	NA	NA	NA	NA	89737114	II	Both	-	FALSE	TRUE
cg08593216_BC21	chr1	153609573	CHTOP	NM_001244664.1	TSSBody	NA	5708255	II	Both	-	FALSE	TRUE
cg08593216_TO21	chr1	153609573	CHTOP	NM_001244664.1	TSSBody	NA	86673479	II	Both	+	FALSE	TRUE
cg08617970_BC21	chr6	30881112	VARS2	NM_001167733.2	TSS1500	NA	3692437	II	Both	-	FALSE	TRUE
cg08639424_BC21	chr6	31542556	TNF	NM_000594.4	TSS1500	NA	3707322	II	Both	-	FALSE	TRUE
cg08657824_TC1	chr5	143760338	KCTD16	NM_020768.4	TSSBody	43746561	88637242	I	Red	+	TRUE	TRUE
cg08669816_BC21	chr1	153610803	CHTOP	NM_001244664.1	TSSBody	NA	20610946	II	Both	-	FALSE	TRUE
cg08669816_TC21	chr1	153610803	CHTOP	NM_001244664.1	TSSBody	NA	5760992	II	Both	+	FALSE	TRUE
cg08675092_TC21	chr6	32811181	PSMB8-AS1	NR_037176.1	TSS1500	NA	87772315	II	Both	+	FALSE	TRUE
cg08684361_BC21	chr6	30852823	DDR1	NM_001297652.1	TSSBody	NA	71609111	II	Both	-	FALSE	TRUE
cg08698936_BC21	chr6	29689809	HLA-F	NM_018950.2	TSS1500	NA	86603953	II	Both	-	FALSE	TRUE
cg08709879_TC21	chr6	33359098	KIFC1	NM_002263.4	TSS1500	NA	26769224	II	Both	+	FALSE	TRUE
cg08709879_TO21	chr6	33359098	KIFC1	NM_002263.4	TSS1500	NA	1637200	II	Both	+	FALSE	TRUE
cg08711281_TC21	chr6	30908302	MUCL3	NM_080870.4	TSS1500	NA	7617250	II	Both	+	FALSE	TRUE
cg08717423_BC21	chr6	31710687	MSH5	NM_172165.3	TSSBody	NA	60629132	II	Both	-	FALSE	TRUE
cg08719551_BC21	chr6	30876159	GTF2H4	NM_001517.5	TSSBody	NA	5629891	II	Both	-	FALSE	TRUE
cg08729914_BC21	chr12	64845936	TBK1	NM_013254.4	TSSBody	NA	1635992	II	Both	-	FALSE	TRUE
cg08740698_BC21	chr12	6493270	LTBR	NM_001270987.2	TSSBody	NA	56795116	II	Both	-	FALSE	TRUE
cg08772265_TC21	chr6	32812395	PSMB8-AS1	NR_037176.1	TSSBody	NA	39600949	II	Both	+	FALSE	TRUE
cg08798692_TC21	chr6	33377958	PHF1	NM_002636.5	TSS1500	NA	87787229	II	Both	+	FALSE	TRUE
cg08799765_BC21	chr15	74287128	PML	NM_033246.2	TSSBody	NA	82637462	II	Both	-	FALSE	TRUE
cg08805748_BC21	chr6	30538523	ABCF1	NM_001090.3	TSS1500	NA	45661821	II	Both	-	FALSE	TRUE
cg08814206_TC21	chr6	32122676	LOC100507547	NR_037169.1	TSS1500	NA	9684303	II	Both	+	FALSE	TRUE
cg08831072_BC21	chr6	32685319	NA	NA	NA	NA	99749244	II	Both	-	FALSE	TRUE
cg08848598_BC21	chr6	31850920	EHMT2	NM_006709.5	TSSBody	NA	59668537	II	Both	-	FALSE	TRUE
cg08880054_BC21	chr6	32820868	TAP1	NM_000593.5	TSSBody	NA	7788403	II	Both	-	FALSE	TRUE
cg08902905_TC21	chr9	120466635	TLR4	NM_138557.3	TSS200	NA	72707580	II	Both	+	FALSE	TRUE
cg08904491_BO21	chr6	30844007	NA	NA	NA	NA	20643283	II	Both	-	FALSE	TRUE
cg08912276_TC21	chr1	152371717	NA	NA	NA	NA	66645271	II	Both	+	FALSE	TRUE
cg08948338_BC21	chr6	32936102	BRD2	NM_005104.4	TSS1500	NA	21711219	II	Both	-	FALSE	TRUE
cg08960812_BC21	chr14	24647118	REC8	NM_005132.3	TSSBody	NA	5614334	II	Both	-	FALSE	TRUE
cg08960812_TC21	chr14	24647118	REC8	NM_005132.3	TSSBody	NA	9715573	II	Both	+	FALSE	TRUE
cg08961072_BO21	chr6	31591771	PRRC2A	NM_080686.3	TSSBody	NA	51699273	II	Both	-	FALSE	TRUE
cg08961072_TC21	chr6	31591771	PRRC2A	NM_080686.3	TSSBody	NA	9608252	II	Both	+	FALSE	TRUE
cg08968507_TC21	chr6	31495090	NA	NA	NA	NA	70711138	II	Both	+	FALSE	TRUE
cg08985333_BC21	chr16	10970960	CIITA	NM_000246.3	TSS200	NA	90668379	II	Both	-	FALSE	TRUE
cg08985333_BO21	chr16	10970960	CIITA	NM_000246.3	TSS200	NA	46730842	II	Both	-	FALSE	TRUE
cg09006592_TC21	chr6	32811768	PSMB8-AS1	NR_037176.1	TSS200	NA	7795988	II	Both	+	FALSE	TRUE
cg09015246_TC21	chr16	10971105	CIITA	NM_000246.3	TSSBody	NA	23799935	II	Both	+	FALSE	TRUE
cg09026253_BC21	chr11	313267	IFITM1	NM_003641.4	TSS1500	NA	76615858	II	Both	-	FALSE	TRUE
cg09042759_TC21	chr6	32134176	EGFL8	NM_030652.4	TSSBody	NA	11616177	II	Both	+	FALSE	TRUE
cg09043226_BC21	chr6	32146099	AGPAT1	NM_001371437.1	TSS1500	NA	4788326	II	Both	-	FALSE	TRUE
cg09043226_BO21	chr6	32146099	AGPAT1	NM_001371437.1	TSS1500	NA	43731869	II	Both	-	FALSE	TRUE
cg09053081_TC21	chr20	44746392	CD40	NM_001322422.2	TSS1500	NA	95667555	II	Both	+	FALSE	TRUE
cg09058747_BO21	chr6	33358564	KIFC1	NM_002263.4	TSS1500	NA	45621550	II	Both	-	FALSE	TRUE
cg09058747_TC21	chr6	33358564	KIFC1	NM_002263.4	TSS1500	NA	62619855	II	Both	+	FALSE	TRUE
cg09061733_BC21	chr11	57364841	SERPING1	NM_000062.3	TSS1500	NA	96715529	II	Both	-	FALSE	TRUE
cg09061733_TC21	chr11	57364841	SERPING1	NM_000062.3	TSS1500	NA	71804175	II	Both	+	FALSE	TRUE
cg09072601_BC21	chr6	30686652	TUBB	NM_001293214.2	TSS1500	NA	99603122	II	Both	-	FALSE	TRUE
cg09072601_TC21	chr6	30686652	TUBB	NM_001293214.2	TSS1500	NA	82737418	II	Both	+	FALSE	TRUE
cg09093811_BC21	chr6	33359130	KIFC1	NM_002263.4	TSS1500	NA	64653115	II	Both	-	FALSE	TRUE
cg09093989_TC1	chr6	5050137	LYRM4-AS1	NR_126015.1	TSSBody	79767258	46752523	I	Red	+	TRUE	TRUE
cg09121623_TC21	chr6	31465344	MICB	NM_001289161.2	TSS1500	NA	97697332	II	Both	+	FALSE	TRUE
cg09158314_BC21	chr13	108922150	TNFSF13B	NM_001145645.2	TSSBody	NA	96772885	II	Both	-	FALSE	TRUE
cg09158314_TO21	chr13	108922150	TNFSF13B	NM_001145645.2	TSSBody	NA	49665868	II	Both	+	FALSE	TRUE
cg09163505_TC21	chr6	31105944	PSORS1C1	NM_014068.3	TSSBody	NA	2704552	II	Both	+	FALSE	TRUE
cg09163778_BC21	chr6	31125417	CCHCR1	NM_019052.4	TSSBody	NA	2671330	II	Both	-	FALSE	TRUE
cg09163778_TC21	chr6	31125417	CCHCR1	NM_019052.4	TSSBody	NA	5606858	II	Both	+	FALSE	TRUE
cg09174467_TC21	chr16	57060748	NLRC5	NM_001330552.2	TSSBody	NA	3702827	II	Both	+	FALSE	TRUE
cg09196959_BC21	chr6	30104440	TRIM40	NM_001286633.2	TSSBody	NA	81776140	II	Both	-	FALSE	TRUE
cg09196959_TC21	chr6	30104440	TRIM40	NM_001286633.2	TSSBody	NA	74798112	II	Both	+	FALSE	TRUE
cg09209606_BC21	chr6	32937910	BRD2	NM_001113182.3	TSS1500	NA	5643325	II	Both	-	FALSE	TRUE
cg09222890_TC21	chr12	6494180	LTBR	NM_001270987.2	TSSBody	NA	93674422	II	Both	+	FALSE	TRUE
cg09222890_TO21	chr12	6494180	LTBR	NM_001270987.2	TSSBody	NA	77777235	II	Both	+	FALSE	TRUE
cg09228194_BC21	chr6	33405457	SYNGAP1	NM_001130066.2	TSSBody	NA	76707497	II	Both	-	FALSE	TRUE
cg09234582_BC21	chr6	33048286	HLA-DPA1	NM_001242524.2	TSSBody	NA	20724906	II	Both	-	FALSE	TRUE
cg09241284_BC21	chr6	30294441	HCG18	NR_102327.1	TSSBody	NA	89717168	II	Both	-	FALSE	TRUE
cg09251764_TC21	chr17	6659070	XAF1	NM_001353140.2	TSS1500	NA	90663551	II	Both	+	FALSE	TRUE
cg09276739_BC21	chr6	31588427	PRRC2A	NM_080686.3	TSS200	NA	9751494	II	Both	-	FALSE	TRUE
cg09281154_BC21	chr6	30852777	DDR1	NM_001297652.1	TSSBody	NA	49704182	II	Both	-	FALSE	TRUE
cg09281154_TC21	chr6	30852777	DDR1	NM_001297652.1	TSSBody	NA	50769139	II	Both	+	FALSE	TRUE
cg09296730_BC21	chr6	30885567	VARS2	NM_001167733.2	TSSBody	NA	5751211	II	Both	-	FALSE	TRUE
cg09312995_BC21	chr6	33418656	SYNGAP1	NM_001130066.2	TSSBody	NA	35692577	II	Both	-	FALSE	TRUE
cg09312995_TC21	chr6	33418656	SYNGAP1	NM_001130066.2	TSSBody	NA	75666441	II	Both	+	FALSE	TRUE
cg09321494_BC21	chr4	103422437	NFKB1	NM_001165412.2	TSS200	NA	60617169	II	Both	-	FALSE	TRUE
cg09321494_TO21	chr4	103422437	NFKB1	NM_001165412.2	TSS200	NA	1633355	II	Both	+	FALSE	TRUE
cg09331876_TC21	chr6	28492217	GPX5	NM_001509.3	TSS1500	NA	86710215	II	Both	+	FALSE	TRUE
cg09331877_BC21	chr6	28493001	GPX5	NM_001509.3	TSS1500	NA	84694458	II	Both	-	FALSE	TRUE
cg09331882_BC21	chr6	28493588	GPX5	NM_001509.3	TSS200	NA	8773397	II	Both	-	FALSE	TRUE
cg09331885_TC21	chr6	28495604	GPX5	NM_001509.3	TSSBody	NA	97661136	II	Both	+	FALSE	TRUE
cg09331885_TO21	chr6	28495604	GPX5	NM_001509.3	TSSBody	NA	91729106	II	Both	+	FALSE	TRUE
cg09334388_BC21	chr6	28698563	NA	NA	NA	NA	61754561	II	Both	-	FALSE	TRUE
cg09334390_BC21	chr6	28698807	NA	NA	NA	NA	92712441	II	Both	-	FALSE	TRUE
cg09334393_BC21	chr6	28699172	NA	NA	NA	NA	49606139	II	Both	-	FALSE	TRUE
cg09334393_TC21	chr6	28699172	NA	NA	NA	NA	22741100	II	Both	+	FALSE	TRUE
cg09334393_TO21	chr6	28699172	NA	NA	NA	NA	82621888	II	Both	+	FALSE	TRUE
cg09334394_BC21	chr6	28699323	NA	NA	NA	NA	11617826	II	Both	-	FALSE	TRUE
cg09334394_TC21	chr6	28699323	NA	NA	NA	NA	97757366	II	Both	+	FALSE	TRUE
cg09334396_TC21	chr6	28699472	NA	NA	NA	NA	58632882	II	Both	+	FALSE	TRUE
cg09334397_TC21	chr6	28699557	NA	NA	NA	NA	13635228	II	Both	+	FALSE	TRUE
cg09334397_TO21	chr6	28699557	NA	NA	NA	NA	69630889	II	Both	+	FALSE	TRUE
cg09337082_BC21	chr21	42792302	MX1	NM_001144925.2	TSS200	NA	9699284	II	Both	-	FALSE	TRUE
cg09338671_TC21	chr6	28944484	NA	NA	NA	NA	68806255	II	Both	+	FALSE	TRUE
cg09338672_TC21	chr6	28944527	NA	NA	NA	NA	76625922	II	Both	+	FALSE	TRUE
cg09338673_BC21	chr6	28944824	NA	NA	NA	NA	60700214	II	Both	-	FALSE	TRUE
cg09338673_TC21	chr6	28944824	NA	NA	NA	NA	26704929	II	Both	+	FALSE	TRUE
cg09338673_TO21	chr6	28944824	NA	NA	NA	NA	17626123	II	Both	+	FALSE	TRUE
cg09338674_TC21	chr6	28944908	NA	NA	NA	NA	51805208	II	Both	+	FALSE	TRUE
cg09338679_BC21	chr6	28945148	NA	NA	NA	NA	26603547	II	Both	-	FALSE	TRUE
cg09338680_BC21	chr6	28945155	NA	NA	NA	NA	44740885	II	Both	-	FALSE	TRUE
cg09338680_TO21	chr6	28945155	NA	NA	NA	NA	77658894	II	Both	+	FALSE	TRUE
cg09338681_TC21	chr6	28945163	NA	NA	NA	NA	31715869	II	Both	+	FALSE	TRUE
cg09338682_TC21	chr6	28945166	NA	NA	NA	NA	3690550	II	Both	+	FALSE	TRUE
cg09338683_TC21	chr6	28945175	NA	NA	NA	NA	9626948	II	Both	+	FALSE	TRUE
cg09338685_TC21	chr6	28945209	NA	NA	NA	NA	41735555	II	Both	+	FALSE	TRUE
cg09339421_BC21	chr6	29002960	LOC100129636	NR_125387.1	TSS1500	NA	76606373	II	Both	-	FALSE	TRUE
cg09339423_TC21	chr6	29003515	LOC100129636	NR_125387.1	TSS1500	NA	50715210	II	Both	+	FALSE	TRUE
cg09339425_BC21	chr6	29003630	LOC100129636	NR_125387.1	TSS200	NA	80600879	II	Both	-	FALSE	TRUE
cg09339425_TC21	chr6	29003630	LOC100129636	NR_125387.1	TSS200	NA	81743949	II	Both	+	FALSE	TRUE
cg09339425_TO21	chr6	29003630	LOC100129636	NR_125387.1	TSS200	NA	6780298	II	Both	+	FALSE	TRUE
cg09339427_BC21	chr6	29003648	LOC100129636	NR_125387.1	TSS200	NA	61768542	II	Both	-	FALSE	TRUE
cg09339817_BC1	chr6	29066711	NA	NA	NA	51672895	4608345	I	Grn	-	FALSE	TRUE
cg09339817_BC21	chr6	29066711	NA	NA	NA	NA	91692195	II	Both	-	FALSE	TRUE
cg09339817_BO21	chr6	29066711	NA	NA	NA	NA	80615914	II	Both	-	TRUE	TRUE
cg09339865_TC21	chr6	29074815	NA	NA	NA	NA	34652271	II	Both	+	FALSE	TRUE
cg09339866_BO21	chr6	29074830	NA	NA	NA	NA	89637857	II	Both	-	FALSE	TRUE
cg09339866_TC21	chr6	29074830	NA	NA	NA	NA	44724221	II	Both	+	FALSE	TRUE
cg09339867_TC21	chr6	29075071	NA	NA	NA	NA	9646458	II	Both	+	FALSE	TRUE
cg09339868_BC21	chr6	29075585	NA	NA	NA	NA	99635431	II	Both	-	FALSE	TRUE
cg09339868_TC21	chr6	29075585	NA	NA	NA	NA	59700865	II	Both	+	FALSE	TRUE
cg09339868_TO21	chr6	29075585	NA	NA	NA	NA	79806992	II	Both	+	FALSE	TRUE
cg09339877_TC21	chr6	29077999	NA	NA	NA	NA	6631397	II	Both	+	FALSE	TRUE
cg09340282_TC21	chr6	29137362	NA	NA	NA	NA	26617542	II	Both	+	FALSE	TRUE
cg09340285_BC21	chr6	29138290	NA	NA	NA	NA	31649558	II	Both	-	FALSE	TRUE
cg09340533_BC21	chr6	29179424	NA	NA	NA	NA	64740240	II	Both	-	FALSE	TRUE
cg09340533_TC21	chr6	29179424	NA	NA	NA	NA	58764255	II	Both	+	FALSE	TRUE
cg09340538_BC21	chr6	29180057	NA	NA	NA	NA	89673282	II	Both	-	FALSE	TRUE
cg09340538_TC21	chr6	29180057	NA	NA	NA	NA	97745505	II	Both	+	FALSE	TRUE
cg09340539_BC21	chr6	29180277	NA	NA	NA	NA	84612247	II	Both	-	FALSE	TRUE
cg09340543_BC21	chr6	29182926	NA	NA	NA	NA	70605113	II	Both	-	FALSE	TRUE
cg09340543_TO21	chr6	29182926	NA	NA	NA	NA	77712200	II	Both	+	FALSE	TRUE
cg09340544_TC21	chr6	29182981	NA	NA	NA	NA	73715165	II	Both	+	FALSE	TRUE
cg09340576_TC21	chr6	29191389	LOC101929006	NR_134629.1	TSS1500	NA	4754547	II	Both	+	FALSE	TRUE
cg09340929_TC21	chr6	29252372	LOC101929006	NR_134630.1	TSSBody	NA	5695160	II	Both	+	FALSE	TRUE
cg09340973_BC21	chr6	29257966	LOC101929006	NR_134630.1	TSSBody	NA	92664841	II	Both	-	FALSE	TRUE
cg09340973_TO21	chr6	29257966	LOC101929006	NR_134630.1	TSSBody	NA	38669953	II	Both	+	FALSE	TRUE
cg09340974_BC21	chr6	29257982	LOC101929006	NR_134630.1	TSSBody	NA	2606261	II	Both	-	FALSE	TRUE
cg09340975_BC21	chr6	29258021	LOC101929006	NR_134630.1	TSSBody	NA	45759184	II	Both	-	FALSE	TRUE
cg09341052_TC21	chr6	29269446	NA	NA	NA	NA	91609384	II	Both	+	FALSE	TRUE
cg09341052_TO21	chr6	29269446	NA	NA	NA	NA	52788828	II	Both	+	FALSE	TRUE
cg09341609_BC21	chr6	29362081	NA	NA	NA	NA	92706115	II	Both	-	FALSE	TRUE
cg09341611_TC21	chr6	29362236	NA	NA	NA	NA	89692863	II	Both	+	FALSE	TRUE
cg09341612_TC21	chr6	29362292	NA	NA	NA	NA	92764362	II	Both	+	FALSE	TRUE
cg09341925_BC21	chr6	29417758	NA	NA	NA	NA	71658529	II	Both	-	FALSE	TRUE
cg09341925_TC21	chr6	29417758	NA	NA	NA	NA	3654543	II	Both	+	FALSE	TRUE
cg09341926_BC21	chr6	29417847	NA	NA	NA	NA	85642877	II	Both	-	FALSE	TRUE
cg09341926_TC21	chr6	29417847	NA	NA	NA	NA	27768577	II	Both	+	FALSE	TRUE
cg09342564_BC21	chr6	29516746	NA	NA	NA	NA	51743865	II	Both	-	FALSE	TRUE
cg09342565_BC21	chr6	29516788	NA	NA	NA	NA	2783912	II	Both	-	FALSE	TRUE
cg09342565_BO21	chr6	29516788	NA	NA	NA	NA	21706525	II	Both	-	FALSE	TRUE
cg09342565_TC21	chr6	29516788	NA	NA	NA	NA	60780534	II	Both	+	FALSE	TRUE
cg09342568_BC21	chr6	29517362	NA	NA	NA	NA	45689868	II	Both	-	FALSE	TRUE
cg09342568_TC21	chr6	29517362	NA	NA	NA	NA	96748928	II	Both	+	FALSE	TRUE
cg09342569_TC21	chr6	29517501	NA	NA	NA	NA	92795343	II	Both	+	FALSE	TRUE
cg09342570_BC21	chr6	29517543	NA	NA	NA	NA	5698946	II	Both	-	FALSE	TRUE
cg09342572_TC21	chr6	29517566	NA	NA	NA	NA	31627258	II	Both	+	FALSE	TRUE
cg09342574_TC21	chr6	29517976	NA	NA	NA	NA	90775418	II	Both	+	FALSE	TRUE
cg09342575_TC21	chr6	29518156	NA	NA	NA	NA	62804125	II	Both	+	FALSE	TRUE
cg09342778_BC21	chr6	29540211	NA	NA	NA	NA	76667341	II	Both	-	FALSE	TRUE
cg09342779_BC21	chr6	29540342	NA	NA	NA	NA	89750881	II	Both	-	FALSE	TRUE
cg09342783_TC21	chr6	29541442	NA	NA	NA	NA	26746270	II	Both	+	FALSE	TRUE
cg09342805_BC21	chr6	29544285	NA	NA	NA	NA	67603904	II	Both	-	FALSE	TRUE
cg09342805_TC21	chr6	29544285	NA	NA	NA	NA	81615223	II	Both	+	FALSE	TRUE
cg09342806_TC21	chr6	29544458	NA	NA	NA	NA	2608901	II	Both	+	FALSE	TRUE
cg09342810_BC21	chr6	29545181	NA	NA	NA	NA	50616820	II	Both	-	FALSE	TRUE
cg09342810_BO21	chr6	29545181	NA	NA	NA	NA	85601407	II	Both	-	FALSE	TRUE
cg09342811_TC21	chr6	29545189	NA	NA	NA	NA	71672242	II	Both	+	FALSE	TRUE
cg09342812_BC21	chr6	29545208	NA	NA	NA	NA	66675247	II	Both	-	FALSE	TRUE
cg09342812_BO21	chr6	29545208	NA	NA	NA	NA	2806503	II	Both	-	FALSE	TRUE
cg09342812_TC21	chr6	29545208	NA	NA	NA	NA	97779495	II	Both	+	FALSE	TRUE
cg09342813_BC21	chr6	29545231	NA	NA	NA	NA	81683253	II	Both	-	FALSE	TRUE
cg09342813_TC21	chr6	29545231	NA	NA	NA	NA	85609900	II	Both	+	FALSE	TRUE
cg09342847_BC21	chr6	29548775	SNORD32B	NR_003049.1	TSS1500	NA	41762275	II	Both	-	FALSE	TRUE
cg09342848_BC21	chr6	29549119	SNORD32B	NR_003049.1	TSS1500	NA	34603295	II	Both	-	FALSE	TRUE
cg09342848_TC21	chr6	29549119	SNORD32B	NR_003049.1	TSS1500	NA	49736830	II	Both	+	FALSE	TRUE
cg09342849_TC21	chr6	29549659	SNORD32B	NR_003049.1	TSS1500	NA	52743549	II	Both	+	FALSE	TRUE
cg09342850_BC1	chr6	29550058	SNORD32B	NR_003049.1	TSSBody	53605225	76615886	I	Red	-	FALSE	TRUE
cg09342850_BC21	chr6	29550058	SNORD32B	NR_003049.1	TSSBody	NA	90654105	II	Both	-	FALSE	TRUE
cg09342870_BC21	chr6	29551522	NA	NA	NA	NA	60657925	II	Both	-	FALSE	TRUE
cg09342872_TC21	chr6	29551737	NA	NA	NA	NA	23767855	II	Both	+	FALSE	TRUE
cg09342873_BC21	chr6	29551781	NA	NA	NA	NA	3612115	II	Both	-	FALSE	TRUE
cg09342873_TC21	chr6	29551781	NA	NA	NA	NA	88722121	II	Both	+	FALSE	TRUE
cg09342875_TC21	chr6	29551954	NA	NA	NA	NA	1723111	II	Both	+	FALSE	TRUE
cg09342876_BO21	chr6	29552140	NA	NA	NA	NA	59680892	II	Both	-	FALSE	TRUE
cg09342878_TC21	chr6	29552358	NA	NA	NA	NA	49706158	II	Both	+	FALSE	TRUE
cg09342880_BC21	chr6	29552497	NA	NA	NA	NA	90727229	II	Both	-	FALSE	TRUE
cg09342880_TO21	chr6	29552497	NA	NA	NA	NA	6615350	II	Both	+	FALSE	TRUE
cg09343677_BC21	chr6	29623314	NA	NA	NA	NA	17695255	II	Both	-	FALSE	TRUE
cg09343677_TO21	chr6	29623314	NA	NA	NA	NA	49636953	II	Both	+	FALSE	TRUE
cg09343679_TC21	chr6	29623559	MOG	NM_206814.6	TSS1500	NA	71640928	II	Both	+	FALSE	TRUE
cg09343680_TC21	chr6	29623730	MOG	NM_206814.6	TSS1500	NA	98727959	II	Both	+	FALSE	TRUE
cg09343693_TC21	chr6	29626000	MOG	NM_206814.6	TSSBody	NA	94799423	II	Both	+	FALSE	TRUE
cg09343693_TO21	chr6	29626000	MOG	NM_206814.6	TSSBody	NA	93740546	II	Both	+	FALSE	TRUE
cg09343696_TC21	chr6	29626581	MOG	NM_206814.6	TSSBody	NA	90632147	II	Both	+	FALSE	TRUE
cg09343799_BC21	chr6	29636415	MOG	NM_206814.6	TSSBody	NA	75777412	II	Both	-	FALSE	TRUE
cg09343800_TC21	chr6	29636419	MOG	NM_206814.6	TSSBody	NA	5617542	II	Both	+	FALSE	TRUE
cg09343810_BC21	chr6	29636993	MOG	NM_206814.6	TSSBody	NA	40795130	II	Both	-	FALSE	TRUE
cg09344533_TC1	chr6	29689126	NA	NA	NA	1723127	82789462	I	Red	+	FALSE	TRUE
cg09344534_BC1	chr6	29689250	NA	NA	NA	91805588	56668821	I	Red	-	FALSE	TRUE
cg09344534_TC1	chr6	29689250	NA	NA	NA	19749104	58710972	I	Red	+	FALSE	TRUE
cg09344541_BC1	chr6	29690155	HLA-F	NM_018950.2	TSS1500	97787113	76660922	I	Red	-	FALSE	TRUE
cg09344546_TC1	chr6	29690159	HLA-F	NM_018950.2	TSS1500	90657186	43762566	I	Red	+	FALSE	TRUE
cg09344547_BC1	chr6	29690167	HLA-F	NM_018950.2	TSS1500	81622330	13777936	I	Red	-	FALSE	TRUE
cg09344548_BC1	chr6	29690191	HLA-F	NM_018950.2	TSS1500	66622979	68745900	I	Red	-	TRUE	TRUE
cg09344555_BC1	chr6	29690253	HLA-F	NM_018950.2	TSS1500	5712293	13760898	I	Grn	-	TRUE	TRUE
cg09344564_TC1	chr6	29691075	HLA-F	NM_018950.2	TSS200	96666288	69624827	I	Red	+	FALSE	TRUE
cg09344564_TC21	chr6	29691075	HLA-F	NM_018950.2	TSS200	NA	95780534	II	Both	+	FALSE	TRUE
cg09344606_TC1	chr6	29691750	HLA-F	NM_018950.2	TSSBody	74653989	81719974	I	Red	+	FALSE	TRUE
cg09344606_TC21	chr6	29691750	HLA-F	NM_018950.2	TSSBody	NA	10639112	II	Both	+	FALSE	TRUE
cg09344608_BC1	chr6	29691764	HLA-F	NM_018950.2	TSSBody	91640929	99784141	I	Red	-	FALSE	TRUE
cg09344621_BC1	chr6	29692470	HLA-F	NM_018950.2	TSSBody	65779559	3803466	I	Red	-	FALSE	TRUE
cg09344623_TO1	chr6	29692512	HLA-F	NM_018950.2	TSSBody	81629964	69741928	I	Grn	+	FALSE	TRUE
cg09344624_TC1	chr6	29692892	HLA-F	NM_018950.2	TSSBody	9734979	15698263	I	Red	+	TRUE	TRUE
cg09344624_TC2	chr6	29692892	HLA-F	NM_018950.2	TSSBody	75624137	15698263	I	Red	+	TRUE	TRUE
cg09344624_TC3	chr6	29692892	HLA-F	NM_018950.2	TSSBody	9734979	45716189	I	Red	+	TRUE	TRUE
cg09344624_TC4	chr6	29692892	HLA-F	NM_018950.2	TSSBody	75624137	45716189	I	Red	+	TRUE	TRUE
cg09344625_BC1	chr6	29692901	HLA-F	NM_018950.2	TSSBody	5793575	40626298	I	Grn	-	TRUE	TRUE
cg09344625_TC1	chr6	29692901	HLA-F	NM_018950.2	TSSBody	1766962	56668969	I	Red	+	FALSE	TRUE
cg09344626_BC1	chr6	29692915	HLA-F	NM_018950.2	TSSBody	34781861	13766992	I	Red	-	TRUE	TRUE
cg09344628_TC1	chr6	29693113	HLA-F	NM_018950.2	TSSBody	20753571	92803260	I	Red	+	FALSE	TRUE
cg09344633_BC1	chr6	29694150	HLA-F	NM_018950.2	TSSBody	5679223	87803547	I	Red	-	FALSE	TRUE
cg09344633_TC1	chr6	29694150	HLA-F	NM_018950.2	TSSBody	34664539	90621936	I	Red	+	FALSE	TRUE
cg09344634_TC1	chr6	29694250	HLA-F	NM_018950.2	TSSBody	42606214	45654889	I	Red	+	FALSE	TRUE
cg09344636_BO1	chr6	29694501	HLA-F-AS1	NR_026972.1	TSSBody	15614825	46748215	I	Grn	-	FALSE	TRUE
cg09344636_TC1	chr6	29694501	HLA-F-AS1	NR_026972.1	TSSBody	41782825	46616988	I	Red	+	FALSE	TRUE
cg09344636_TO1	chr6	29694501	HLA-F-AS1	NR_026972.1	TSSBody	2677863	35809273	I	Grn	+	FALSE	TRUE
cg09344637_TC1	chr6	29694752	HLA-F-AS1	NR_026972.1	TSSBody	55622169	2604269	I	Red	+	TRUE	TRUE
cg09344641_TC1	chr6	29694902	HLA-F-AS1	NR_026972.1	TSSBody	35753271	2664180	I	Red	+	FALSE	TRUE
cg09344643_BO1	chr6	29697760	HLA-F-AS1	NR_026972.1	TSSBody	67669219	86674454	I	Grn	-	FALSE	TRUE
cg09344643_TC1	chr6	29697760	HLA-F-AS1	NR_026972.1	TSSBody	89617121	90716957	I	Red	+	FALSE	TRUE
cg09344645_TC1	chr6	29697968	HLA-F-AS1	NR_026972.1	TSSBody	99663836	76635112	I	Red	+	FALSE	TRUE
cg09344646_TC1	chr6	29698592	HLA-F-AS1	NR_026972.1	TSSBody	21653926	20771952	I	Red	+	FALSE	TRUE
cg09344650_BC1	chr6	29699389	HLA-F-AS1	NR_026972.1	TSSBody	8773228	76614373	I	Grn	-	FALSE	TRUE
cg09344650_TC1	chr6	29699389	HLA-F-AS1	NR_026972.1	TSSBody	57603181	10810835	I	Red	+	FALSE	TRUE
cg09344651_BO1	chr6	29699447	HLA-F-AS1	NR_026972.1	TSSBody	7601200	15655846	I	Grn	-	FALSE	TRUE
cg09344651_TC1	chr6	29699447	HLA-F-AS1	NR_026972.1	TSSBody	3612945	85618963	I	Red	+	FALSE	TRUE
cg09344652_BC1	chr6	29699784	HLA-F-AS1	NR_026972.1	TSSBody	87783392	10712921	I	Red	-	FALSE	TRUE
cg09344657_BC1	chr6	29700504	HLA-F-AS1	NR_026972.1	TSSBody	81616190	90701567	I	Grn	-	FALSE	TRUE
cg09344658_TC1	chr6	29700519	HLA-F-AS1	NR_026972.1	TSSBody	41640828	80674258	I	Red	+	FALSE	TRUE
cg09344659_TC1	chr6	29700754	HLA-F-AS1	NR_026972.1	TSSBody	71603281	91612836	I	Red	+	TRUE	TRUE
cg09344667_BC1	chr6	29701023	HLA-F-AS1	NR_026972.1	TSSBody	91792137	10678871	I	Grn	-	FALSE	TRUE
cg09344667_TC1	chr6	29701023	HLA-F-AS1	NR_026972.1	TSSBody	97745957	11773905	I	Red	+	FALSE	TRUE
cg09344670_BC1	chr6	29701993	HLA-F-AS1	NR_026972.1	TSSBody	91663377	70601585	I	Grn	-	FALSE	TRUE
cg09344670_TC1	chr6	29701993	HLA-F-AS1	NR_026972.1	TSSBody	90612925	40773897	I	Red	+	FALSE	TRUE
cg09344671_TC1	chr6	29704083	HLA-F-AS1	NR_026972.1	TSSBody	87796397	61787893	I	Red	+	FALSE	TRUE
cg09344672_BC1	chr6	29704320	HLA-F-AS1	NR_026972.1	TSSBody	80652905	18664249	I	Red	-	FALSE	TRUE
cg09344673_BC1	chr6	29704638	HLA-F-AS1	NR_026972.1	TSSBody	45660542	59620912	I	Red	-	FALSE	TRUE
cg09344675_BC1	chr6	29705528	HLA-F-AS1	NR_026972.1	TSSBody	87677937	6783970	I	Red	-	FALSE	TRUE
cg09344675_TC1	chr6	29705528	HLA-F-AS1	NR_026972.1	TSSBody	92810121	78684822	I	Grn	+	FALSE	TRUE
cg09344677_BC1	chr6	29706179	HLA-F-AS1	NR_026972.1	TSSBody	66780242	65642906	I	Red	-	FALSE	TRUE
cg09344677_TC1	chr6	29706179	HLA-F-AS1	NR_026972.1	TSSBody	7750910	66770166	I	Red	+	FALSE	TRUE
cg09344678_BC1	chr6	29706183	HLA-F-AS1	NR_026972.1	TSSBody	11737859	3761176	I	Red	-	FALSE	TRUE
cg09344678_TC1	chr6	29706183	HLA-F-AS1	NR_026972.1	TSSBody	28687122	76766467	I	Red	+	FALSE	TRUE
cg09344759_BC21	chr6	29716781	HLA-F-AS1	NR_026972.1	TSSBody	NA	64689171	II	Both	-	FALSE	TRUE
cg09344760_BC21	chr6	29716802	HLA-F-AS1	NR_026972.1	TSSBody	NA	24777550	II	Both	-	FALSE	TRUE
cg09344761_BC21	chr6	29716847	HLA-F-AS1	NR_026972.1	TSS200	NA	44723167	II	Both	-	FALSE	TRUE
cg09344785_BC21	chr6	29717785	HLA-F-AS1	NR_026972.1	TSS1500	NA	95716359	II	Both	-	FALSE	TRUE
cg09344785_BO21	chr6	29717785	HLA-F-AS1	NR_026972.1	TSS1500	NA	29733875	II	Both	-	FALSE	TRUE
cg09344785_TC21	chr6	29717785	HLA-F-AS1	NR_026972.1	TSS1500	NA	51761525	II	Both	+	FALSE	TRUE
cg09344855_BC1	chr6	29690030	HLA-F	NM_018950.2	TSS1500	41623820	52723242	I	Red	-	FALSE	TRUE
cg09344856_TC1	chr6	29690034	HLA-F	NM_018950.2	TSS1500	52807553	84725411	I	Grn	+	FALSE	TRUE
cg09344856_TC21	chr6	29690034	HLA-F	NM_018950.2	TSS1500	NA	4703396	II	Both	+	FALSE	TRUE
cg09344857_TC1	chr6	29690036	HLA-F	NM_018950.2	TSS1500	2769169	49675955	I	Red	+	FALSE	TRUE
cg09344857_TC21	chr6	29690036	HLA-F	NM_018950.2	TSS1500	NA	67724876	II	Both	+	FALSE	TRUE
cg09344863_TC1	chr6	29690134	HLA-F	NM_018950.2	TSS1500	82653110	3810105	I	Red	+	TRUE	TRUE
cg09344925_BC1	chr6	29691847	HLA-F	NM_018950.2	TSSBody	90706455	51782202	I	Grn	-	FALSE	TRUE
cg09344928_BC1	chr6	29691996	HLA-F	NM_018950.2	TSSBody	76604314	2799918	I	Red	-	FALSE	TRUE
cg09344930_BC1	chr6	29692028	HLA-F	NM_018950.2	TSSBody	78805949	81717381	I	Grn	-	FALSE	TRUE
cg09344931_TC1	chr6	29692032	HLA-F	NM_018950.2	TSSBody	88796847	99723393	I	Red	+	FALSE	TRUE
cg09344933_TC1	chr6	29692069	HLA-F	NM_018950.2	TSSBody	69664222	9763184	I	Grn	+	FALSE	TRUE
cg09345137_BC1	chr6	29757445	NA	NA	NA	11707989	76713506	I	Grn	-	FALSE	TRUE
cg09345137_TC1	chr6	29757445	NA	NA	NA	51789839	41787890	I	Red	+	FALSE	TRUE
cg09345138_BC1	chr6	29757482	NA	NA	NA	76609371	41632889	I	Grn	-	FALSE	TRUE
cg09345138_TC1	chr6	29757482	NA	NA	NA	34652955	75724894	I	Red	+	FALSE	TRUE
cg09345139_BC1	chr6	29757590	NA	NA	NA	4668319	75745169	I	Red	-	FALSE	TRUE
cg09345139_TC1	chr6	29757590	NA	NA	NA	58701880	44777904	I	Red	+	FALSE	TRUE
cg09345140_TO1	chr6	29757832	NA	NA	NA	49658208	34720129	I	Grn	+	FALSE	TRUE
cg09345141_BC1	chr6	29758051	NA	NA	NA	44630912	5686376	I	Red	-	FALSE	TRUE
cg09345145_BC1	chr6	29759309	HLA-V	NR_132323.1	TSS1500	96737422	15784923	I	Red	-	FALSE	TRUE
cg09345145_TC1	chr6	29759309	HLA-V	NR_132323.1	TSS1500	81716387	26683162	I	Red	+	FALSE	TRUE
cg09345150_BO1	chr6	29759700	HCG4	NR_002139.2	TSSBody	10726297	67688173	I	Grn	-	TRUE	FALSE
cg09345150_BO2	chr6	29759700	HCG4	NR_002139.2	TSSBody	23757196	67688173	I	Grn	-	TRUE	TRUE
cg09345150_TC1	chr6	29759700	HCG4	NR_002139.2	TSSBody	63706570	53712114	I	Grn	+	TRUE	TRUE
cg09345150_TC2	chr6	29759700	HCG4	NR_002139.2	TSSBody	76675258	53712114	I	Grn	+	TRUE	FALSE
cg09345150_TC3	chr6	29759700	HCG4	NR_002139.2	TSSBody	63706570	81687429	I	Grn	+	TRUE	FALSE
cg09345150_TC4	chr6	29759700	HCG4	NR_002139.2	TSSBody	76675258	81687429	I	Grn	+	TRUE	TRUE
cg09345157_BC1	chr6	29759989	HCG4	NR_002139.2	TSSBody	8731448	63617227	I	Red	-	FALSE	TRUE
cg09345188_BC1	chr6	29760382	HCG4	NR_002139.2	TSSBody	67697581	99701540	I	Red	-	FALSE	TRUE
cg09345189_BC1	chr6	29760458	HCG4	NR_002139.2	TSSBody	9728273	84731319	I	Red	-	FALSE	TRUE
cg09345190_BC1	chr6	29760499	HCG4	NR_002139.2	TSSBody	45625918	28779253	I	Red	-	FALSE	TRUE
cg09345201_BC1	chr6	29762054	HLA-V	NR_132323.1	TSSBody	96782171	23767565	I	Red	-	FALSE	TRUE
cg09345201_TC1	chr6	29762054	HLA-V	NR_132323.1	TSSBody	11707157	99769827	I	Red	+	FALSE	TRUE
cg09345202_BC1	chr6	29762585	HLA-V	NR_132323.1	TSSBody	22646543	87635571	I	Red	-	FALSE	TRUE
cg09345203_TC1	chr6	29762945	HLA-V	NR_132323.1	TSSBody	97619456	69779846	I	Red	+	FALSE	TRUE
cg09345204_BC1	chr6	29763077	HLA-V	NR_132323.1	TSSBody	20808186	2772206	I	Red	-	FALSE	TRUE
cg09345204_TC1	chr6	29763077	HLA-V	NR_132323.1	TSSBody	85787959	38667163	I	Red	+	FALSE	TRUE
cg09345213_BC1	chr6	29764626	HLA-V	NR_132323.1	TSSBody	19795975	85697313	I	Red	-	FALSE	TRUE
cg09345214_TC1	chr6	29764655	HLA-V	NR_132323.1	TSSBody	78690952	2713449	I	Red	+	FALSE	TRUE
cg09345215_BC1	chr6	29764996	HLA-V	NR_132323.1	TSSBody	67689911	71673877	I	Red	-	FALSE	TRUE
cg09345215_TC1	chr6	29764996	HLA-V	NR_132323.1	TSSBody	51624825	2783166	I	Red	+	FALSE	TRUE
cg09345216_BC1	chr6	29765270	HLA-V	NR_132323.1	TSSBody	61746279	95741286	I	Red	-	FALSE	TRUE
cg09345216_TC1	chr6	29765270	HLA-V	NR_132323.1	TSSBody	98603575	26709905	I	Red	+	FALSE	TRUE
cg09345223_BC1	chr6	29766861	NA	NA	NA	80649298	34715881	I	Grn	-	FALSE	TRUE
cg09345223_BO1	chr6	29766861	NA	NA	NA	5797131	21689836	I	Grn	-	FALSE	TRUE
cg09345223_BO2	chr6	29766861	NA	NA	NA	96726255	21689836	I	Grn	-	FALSE	TRUE
cg09345223_BO21	chr6	29766861	NA	NA	NA	NA	69672555	II	Both	-	TRUE	TRUE
cg09345223_BO3	chr6	29766861	NA	NA	NA	5797131	35686597	I	Grn	-	FALSE	TRUE
cg09345223_BO4	chr6	29766861	NA	NA	NA	96726255	35686597	I	Grn	-	FALSE	TRUE
cg09345223_TC1	chr6	29766861	NA	NA	NA	97760823	9730115	I	Red	+	FALSE	TRUE
cg09345223_TC2	chr6	29766861	NA	NA	NA	97781584	9730115	I	Red	+	FALSE	TRUE
cg09345223_TC21	chr6	29766861	NA	NA	NA	NA	26682226	II	Both	+	FALSE	TRUE
cg09345223_TC22	chr6	29766861	NA	NA	NA	NA	97689523	II	Both	+	FALSE	TRUE
cg09345223_TC3	chr6	29766861	NA	NA	NA	97760823	99760445	I	Red	+	FALSE	TRUE
cg09345223_TC4	chr6	29766861	NA	NA	NA	97781584	99760445	I	Red	+	FALSE	TRUE
cg09345229_BC1	chr6	29767013	NA	NA	NA	41661585	55667573	I	Grn	-	FALSE	TRUE
cg09345230_BC1	chr6	29767015	NA	NA	NA	92771911	5697104	I	Grn	-	TRUE	TRUE
cg09345245_BO1	chr6	29767345	NA	NA	NA	15725854	70770856	I	Grn	-	FALSE	TRUE
cg09345246_TC1	chr6	29767394	NA	NA	NA	94712347	86727493	I	Grn	+	FALSE	TRUE
cg09345247_BO1	chr6	29767566	NA	NA	NA	5673413	19787159	I	Grn	-	FALSE	TRUE
cg09345248_BC1	chr6	29767588	NA	NA	NA	85697115	2651262	I	Grn	-	FALSE	TRUE
cg09345248_TC1	chr6	29767588	NA	NA	NA	24609869	9759341	I	Red	+	FALSE	TRUE
cg09345249_BC1	chr6	29767623	NA	NA	NA	56611567	56777542	I	Grn	-	FALSE	TRUE
cg09345250_BC1	chr6	29767687	NA	NA	NA	81765248	92689206	I	Grn	-	FALSE	TRUE
cg09345251_TC1	chr6	29767765	NA	NA	NA	71775557	10805239	I	Red	+	FALSE	TRUE
cg09345253_TC1	chr6	29767919	NA	NA	NA	70700838	80685244	I	Red	+	FALSE	TRUE
cg09345253_TC21	chr6	29767919	NA	NA	NA	NA	28652273	II	Both	+	FALSE	TRUE
cg09345254_BC1	chr6	29768026	NA	NA	NA	75603186	95802339	I	Red	-	FALSE	TRUE
[truncated: 5,832 more rows]
